# Supplementary material for: Circulating Tumor Reactive KIR+CD8+ T cells Suppress Anti-Tumor Immunity in Patients with Melanoma
Source: Research Square preprint supplement (doi:10.21203/rs.3.rs-3956671/v1), 2024-02-28
Supplement: Supplementary file 1 [file 5185413745065eecf9309d01.xlsx]

## Sheet: Table of contents
	Table of contents
	Table S1	Patient characteristics
	Table S2	Antibody information
	Table S3	Processing information for single-cell sequencing samples
	Table S4	Differentially expressed genes for all T cell clusters (corresponding to Figure 1B)
	Table S5	Differentially expressed genes for CD8 T cell subset
	Table S6	Differentially expressed genes for differential abundance clusters (corresponding to Figure 2B)
	Table S7	Differentially associated genes along pseudotime for Lineage 1 and Lineage 2 (corresponding to Figure 3B)
	Table S8	Conserved signature between KIR+CD8+ T cells in the blood (PBMC) and tumor (TIL)
	Table S9	Spearman correlation coefficient between RNA and CITEseq expression
	Table S10	Flow cytometry cohort data and clinical outcomes (corresponding to Figures 2E and 5D)
	Table S11	Single cell cohort data and clinical outcomes (corresponding to Figures 5B-C)

## Sheet: Table S1 - Clinical information
Table S1: Patient characteristics
	Patient ID	Sex	Age	Stage	Sun-exposed	Lesion location	Prior immune checkpoint blockade	Follow-up time (days)	Outcome (0=censor, 1=death)	scRNA+TCRseq	CITEseq	Whole exome	Bulk RNAseq	MCR screen	Flow Cytometry
	Mel-T-01	F	62	IV	Yes	Lymph node	Yes	164	1	Yes	–	–	Yes	Yes	–
	Mel-T-02	M	40	IIIC	Yes	Lymph node	Yes	904	0	Yes	–	–	Yes	–	–
	Mel-T-03	M	71	IIIB	Yes	Lymph node	Yes	288	0	Yes	–	–	Yes	Yes	–
	Mel-T-04	M	61	IV	Yes	Skin	Yes	–	–	–	–	–	Yes	–	–
	Mel-T-05	F	44	IV	Yes	Lymph node	Yes	1095	0	Yes	–	Yes	Yes	Yes	–
	Mel-T-06	M	57	IV	Yes	Lung	Yes	1095	0	Yes	–	–	–	Yes	–
	Mel-T-07	F	40	IV	Yes	Gall bladder	Yes	963	1	Yes	–	Yes	Yes	Yes	–
	Mel-T-08	M	68	IV	Yes	Small bowel	Yes	1095	0	Yes	–	–	–	Yes	–
	Mel-T-09	M	43	IV	Yes	Lymph node	Yes	1095	0	Yes	–	–	–	Yes	–
	Mel-T-10	M	61	IV	Yes	Soft tissue	Yes	228	1	Yes	–	Yes	Yes	Yes	Yes
	Mel-T-11	M	36	IV	Yes	Lymph node	Yes	474	1	Yes	–	Yes	Yes	Yes	–
	Mel-T-12	M	34	IV	Yes	Lymph node	Yes	1095	0	Yes	–	Yes	Yes	Yes	–
	Mel-T-13	M	83	III	Yes	–	Yes	1003	1	–	–	–	–	–	Yes
	Mel-T-14	M	60	IV	Yes	–	Yes	749	1	–	–	–	–	–	Yes
	Mel-T-15	F	65	IV	Yes	–	Yes	450	1	–	–	–	–	–	Yes
	Mel-T-16	M	37	IV	Yes	–	Yes	335	1	–	–	–	–	–	Yes
	Mel-T-17	M	34	IIIC	Yes	–	Yes	1095	0	–	–	–	–	–	Yes
	Mel-T-18	M	41	IV	Yes	–	Yes	136	1	–	–	–	–	–	Yes
	Mel-T-19	M	41	IV	Yes	–	Yes	46	1	–	–	–	–	–	Yes
	Mel-T-20	M	45	IIIB	Yes	–	Yes	1095	0	–	–	–	–	–	Yes
	Mel-T-21	F	77	IV	Yes	–	Yes	42	1	–	–	–	–	–	Yes
	Mel-T-22	M	58	IV	Yes	–	Yes	1095	0	–	–	–	–	–	Yes
	Mel-T-23	M	33	IIIC	Yes	–	Yes	1085	0	–	–	–	–	–	Yes
	Mel-T-24	M	40	IV	Yes	–	Yes	310	1	–	–	–	–	–	Yes
	Mel-T-25	M	77	IV	Yes	–	Yes	968	0	–	–	–	–	–	Yes
	Mel-T-26	M	64	IV	Yes	–	Yes	933	0	–	–	–	–	–	Yes
	Mel-T-27	M	52	IV	Yes	–	Yes	478	1	–	–	–	–	–	Yes
	Mel-T-28	F	82	IV	Yes	–	Yes	318	1	–	–	–	–	–	Yes
	Mel-T-29	F	64	IV	Yes	–	Yes	45	1	–	–	–	–	–	Yes
	Mel-T-30	F	66	IV	No	–	Yes	400	1	–	–	–	–	–	Yes
	Mel-T-31	M	59	IV	Yes	–	Yes	154	1	–	–	–	–	–	Yes
	Mel-T-32	M	77	IIIC	Yes	–	Yes	135	1	–	–	–	–	–	Yes
	Mel-T-33	M	50	IIIC	Yes	–	Yes	142	1	–	–	–	–	–	Yes
	Mel-T-34	M	67	IIIC	Yes	–	Yes	141	1	–	–	–	–	–	Yes
	Mel-T-35	F	65	IV	Yes	–	Yes	555	0	–	–	–	–	–	Yes
	Mel-T-36	M	69	IV	Yes	–	Yes	111	1	–	–	–	–	–	Yes
	Mel-T-37	F	45	IV	No	–	Yes	400	0	–	–	–	–	–	Yes
	Mel-T-38	F	67	IV	Yes	–	Yes	449	0	–	–	–	–	–	Yes
	Mel-T-39	M	60	IV	Yes	–	Yes	434	0	–	–	–	–	–	Yes
	Mel-T-40	F	62	IV	Yes	–	Yes	142	1	–	–	–	–	–	Yes
	Mel-T-41	M	53	IV	Yes	Lymph node	Yes	–	–	–	–	–	Yes	–	–
	Mel-T-42	M	80	III	Yes	Lymph node	Yes			–	–	–	Yes	–	–
	Mel-T-43	F	45	IV	Yes	Subcutaneous	Yes	–	–	–	–	–	Yes	–	–
	Mel-UT-01	F	79	IIIB	Yes	Lymph node	No	1095	0	Yes	–	–	Yes	Yes	–
	Mel-UT-02	M	71	IIID	No	Lymph node	Yes	400	0	Yes	–	Yes	Yes	Yes	–
	Mel-UT-03	F	66	IV	Yes	Brain	No	136	1	Yes	–	–	–	–	–
	Mel-UT-04	F	63	IIIB	Yes	Lymph node	No	729	0	Yes	–	–	Yes	–	–
	Mel-UT-05	M	80	IIIC	Yes	Lymph node	No	764	0	Yes	–	–	–	–	Yes
	Mel-UT-06	M	59	IIIC	Yes	Abdominal wall	No	1095	0	Yes	–	–	–	–	–
	Mel-UT-07	M	51	IIIB	Yes	Lymph node	No	1095	0	Yes	–	–	–	–	–
	Mel-UT-08	F	66	IIIB	Yes	Lymph node	No	893	0	Yes	–	–	–	–	Yes
	Mel-UT-09	M	67	IIIC	Yes	Lymph node	No	840	0	Yes	Yes	–	–	–	–
	Mel-UT-10	F	51	IIIB	Yes	Lymph node	No	862	0	Yes	–	–	–	–	Yes
	Mel-UT-11	M	75	IIIC	Yes	Lymph node	No	818	0	Yes	–	–	Yes	–	–
	Mel-UT-12	M	61	IIIC	Yes	Lymph node	No	848	0	Yes	Yes	–	–	–	–
	Mel-UT-13	M	86	III	Yes	Lymph node	No	905	0	Yes	–	–	–	–	–
	Mel-UT-14	M	62	IV	Yes	Brain	No	1037	0	Yes	–	–	–	–	–
	Mel-UT-15	M	77	IV	Yes	Soft tissue	No	1048	1	Yes	–	–	–	–	–
	Mel-UT-16	M	62	IB	Yes	Back	No	1023	1	Yes	–	–	–	–	–
	Mel-UT-17	M	60	IIIC	Yes	Back	No	1058	0	Yes	Yes	–	–	–	Yes
	Mel-UT-18	F	55	IV	Yes	Brain	No	41	1	Yes	–	–	–	–	Yes
	Mel-UT-19	M	71	IIB	Yes	–	No	288	0	–	–	–	–	–	Yes
	Mel-UT-20	M	71	IIIC	Yes	–	No	1095	0	–	–	–	–	–	Yes
	Mel-UT-21	F	69	IIIB	No	–	No	963	0	–	–	–	–	–	Yes
	Mel-UT-22	F	71	IV	Yes	–	No	97	1	–	–	–	–	–	Yes
	Mel-UT-23	M	54	IV	Yes	–	No	484	0	–	–	–	–	–	Yes
	Mel-UT-24	M	62	IV	Yes	–	No	437	0	–	–	–	–	–	Yes
	Mel-UT-25	M	75	IV	Yes	–	No	420	0	–	–	–	–	–	Yes
	Mel-UT-26	M	71	IIIC	Yes	–	No	426	0	–	–	–	–	–	Yes
	Mel-UT-27	F	69	IV	No	–	No	218	1	–	–	–	–	–	Yes
	Mel-UT-28	M	65	IV	Yes	–	No	358	0	–	–	–	–	–	Yes
	Mel-UT-29	F	63	IV	Yes	–	No	343	0	–	–	–	–	–	Yes
	Mel-UT-30	M	74	IV	Yes	–	No	326	0	–	–	–	–	–	Yes
	Mel-UT-31	F	70	IV	Yes	–	No	274	0	–	–	–	–	–	Yes

## Sheet: Table S2 - Antibodies
Table S2: Antibodies
	Experiment	Reagent	Clone	Source	Catalog #	RRID	Staining concentration
	Cell sorting
		Human BD Fc Block	Fc1	BD Pharmingen	564220	AB_2728082
		LIVE/DEAD Fixable Red		Invitrogen	L23102		1:1000
		Alexa Fluor 488 anti-human CD3	HIT3a	Biolegend	300320	AB_493691	1:50
		APC/Cyanine7 anti-human CD8	SK1	Biolegend	344714	AB_2044006	1:50
		APC anti-human Melanoma (MCSP)	EP-1	Miltenyi	130-117-347	AB_2661249	1:50
		BB700 anti-human CD279 (PD-1)	EH12.1	BD Horizon	566460	AB_2744348	1:50
		PE/Cyanine7 anti-human TIGIT	MBSA43	eBioscience	25-9500-42	AB_2573548	1:50
		PerCP/Cyanine5.5 anti-human CD3	UCHT1	Biolegend	300430	AB_893299	1:50
		PE anti-human CD56 (NCAM)	5.11H11	Biolegend	362508	AB_2563925	1:50
		PE/Cyanine7 anti-human CD11b	ICRF44	Biolegend	301322	AB_830644	1:50
		FITC anti-human CD45	2D1	Biolegend	36850	AB_2566368	1:50
		Alexa Fluor 488 anti-human CD3	HIT3a	Biolegend	300320	AB_493691	1:50
		PerCP/Cyanine5.5 anti-human CD45	HI30	BD Pharmingen	564105	AB_2744405	1:50
		PerCP/Cyanine5.5 anti-human CD8	HIT8a	Biolegend	300924	AB_1575074	1:50
	Immunophenotyping
		Human BD Fc Block	Fc1	BD Pharmingen	564220	AB_2728082
		LIVE/DEAD Fixable Near-IR (780) viability	–	Invitrogen	L34994		1:1000
		BV650 anti-human CD3	UCHT1	Biolegend	300468	AB_2629574	1:50
		Alexa Fluor 700 anti-human CD8	RPA-T8	BD Pharmingen	561453	AB_10643765	1:50
		Alexa Fluor 647 anti-human CD56	5.1H11	Biolegend	304612	AB_493181	1:50
		BV421 anti-human CD158e1	DX9	Biolegend	312713	AB_10897807	1:100
		PE anti-human CD158b/j	DX27	Biolegend	312605	AB_2296485	1:100
		PE/Cyanine7 anti-human KLRD1	DX22	Biolegend	305516	AB_2632753	1:100
		BV510 anti-human CX3CR1	2A9-1	Biolegend	341621	AB_2687149	1:100
		FITC anti-human KLRG1	SA231A2	Biolegend	367713	AB_2572158	1:100
		PerCP-eFluor 710 anti-human TIGIT	MBSA43	eBioscience	46-9500-42	AB_10853679	1:100
		PE/Cyanine7 anti-human Perforin	B-D48	Biolegend	353316	AB_2571973	1:100
		BV510 anti-human IFN-γ	4S.B3	Biolegend	502544	AB_2563883	1:100
		FITC anti-mouse/human Helios	22F6	Biolegend	137204	AB_10549181	1:100
		PerCP/Cyanine5.5 anti-human T-bet	4B10	Biolegend	644806	AB_1595488	1:100
	MCR screening
		PE anti-human CD4	RPA-T4	Biolegend	300539	AB_2562053	1:500
		APC anti-human TCR α/β	IP26	BioLegend	306718	AB_10612569	1:300

## Sheet: Table S3 - scRNAseq processing
Table S3: Processing information for single-cell sequencing samples
	Patient ID	Lesion location	scRNA+TCRseq	CITEseq	Processing	Sorting strategy	10X kit
	Mel-T-01	Lymph node	Yes	–	Fresh	Total Live T cells	v1.1
	Mel-T-01	Blood	Yes	–	Fresh	Live memory T cells	v1.1
	Mel-T-02	Lymph node	Yes	–	Fresh	Total Live T cells	v1.1
	Mel-T-02	Blood	Yes	–	Fresh	Total Live T cells	v1.1
	Mel-T-03	Lymph node	Yes	–	Fresh	Total Live T cells	v1.1
	Mel-T-03	Blood	Yes	–	Fresh	Live memory T cells	v1.1
	Mel-T-05	Lymph node	Yes	–	Fresh	Total Live T cells	v1.1
	Mel-T-05	Blood	Yes	–	Fresh	Total Live T cells	v1.1
	Mel-T-06	Lung	Yes	–	Fresh	Total Live T cells	v1.1
	Mel-T-06	Blood	Yes	–	Fresh	Live memory T cells	v1.1
	Mel-T-07	Gall bladder	Yes	–	Fresh	Total Live T cells	v1.1
	Mel-T-07	Blood	Yes	–	Fresh	Total Live T cells	v1.1
	Mel-T-08	Small bowel	Yes	–	Fresh	Total Live T cells	v1.1
	Mel-T-08	Blood	Yes	–	Fresh	Total Live T cells	v1.1
	Mel-T-10	Soft tissue	Yes	–	Fresh	Total Live T cells	v1.1
	Mel-T-10	Blood	Yes	–	Fresh	Total Live T cells	v1.1
	Mel-T-12	Lymph node	Yes	–	Fresh	Total Live T cells	v1.1
	Mel-T-12	Blood	Yes	–	Fresh	Total Live T cells	v1.1
	Mel-UT-01	Lymph node	Yes	–	Fresh	Total Live T cells	v1.1
	Mel-UT-01	Blood	Yes	–	Fresh	Total Live T cells	v1.1
	Mel-UT-02	Lymph node	Yes	–	Fresh	Total Live T cells	v1.1
	Mel-UT-02	Blood	Yes	–	Fresh	Total Live T cells	v1.1
	Mel-UT-04	Lymph node	Yes	–	Fresh	Total Live cells	v1.1
	Mel-UT-04	Blood	Yes	–	Fresh	Total Live T cells	v1.1
	Mel-UT-06	Abdominal wall	Yes	–	Fresh	CD45+, CD56+, CD11b+, CD8+, CD45-	v1.1
	Mel-UT-06	Blood	Yes	–	Fresh	CD45+, CD56+, CD11b+, CD8+	v1.1
	Mel-UT-07	Lymph node	Yes	–	Fresh	CD45+, CD56+, CD11b+, CD8+, CD45-	v1.1
	Mel-UT-07	Blood	Yes	–	Fresh	CD45+, CD56+, CD11b+, CD8+	v1.1
	Mel-UT-14	Brain	Yes	–	Fresh	50% Live CD45+CD3-, 50% Live CD45+CD3+	v1.1
	Mel-UT-14	Blood	Yes	–	Fresh	Total Live T cells	v1.1
	Mel-UT-15	Soft tissue	Yes	–	Fresh	CD45+, CD56+, CD11b+, CD8+, CD45-	v1.1
	Mel-UT-15	Blood	Yes	–	Fresh	CD45+, CD56+, CD11b+, CD8+	v1.1
	Mel-UT-16	Back	Yes	–	Fresh	CD45+, CD56+, CD11b+, CD8+, CD45-	v1.1
	Mel-UT-16	Blood	Yes	–	Fresh	CD45+, CD56+, CD11b+, CD8+	v1.1
	Mel-T-09	Lymph node	Yes	–	Frozen	Total Live T cells	v1.1
	Mel-T-09	Blood	Yes	–	Frozen	Total Live T cells	v1.1
	Mel-T-11	Lymph node	Yes	–	Frozen	Live CD8, Treg, Teff	v1.1
	Mel-T-11	Blood	Yes	–	Frozen	Live CD8, Treg, Teff	v1.1
	Mel-UT-03	Brain	Yes	–	Frozen	33% Live CD3+, 67% Live CD45+	v1.1
	Mel-UT-03	Blood	Yes	–	Frozen	Total Live CD45+	v1.1
	Mel-UT-05	Lymph node	Yes	–	Frozen	75% Live CD3+CD8+, 15% Live CD3+CD8-, 10% CD3-	v2
	Mel-UT-05	Blood	Yes	–	Frozen	75% Live CD3+CD8+, 25% Live CD3+CD8	v2
	Mel-UT-08	Lymph node	Yes	–	Frozen	75% Live CD3+CD8+, 15% Live CD3+CD8-, 10% CD3-	v2
	Mel-UT-08	Blood	Yes	–	Frozen	75% Live CD3+CD8+, 25% Live CD3+CD8	v2
	Mel-UT-09	Lymph node	Yes	–	Frozen	75% Live CD3+CD8+, 15% Live CD3+CD8-, 10% CD3-	v2
	Mel-UT-09	Blood	Yes	Yes	Frozen	75% Live CD3+CD8+, 25% Live CD3+CD8	v2
	Mel-UT-10	Lymph node	Yes	–	Frozen	75% Live CD3+CD8+, 15% Live CD3+CD8-, 10% CD3-	v2
	Mel-UT-10	Blood	Yes	–	Frozen	75% Live CD3+CD8+, 25% Live CD3+CD8	v2
	Mel-UT-11	Lymph node	Yes	–	Frozen	75% Live CD3+CD8+, 15% Live CD3+CD8-, 10% CD3-	v2
	Mel-UT-11	Blood	Yes	–	Frozen	75% Live CD3+CD8+, 25% Live CD3+CD8	v2
	Mel-UT-12	Lymph node	Yes	–	Frozen	75% Live CD3+CD8+, 15% Live CD3+CD8-, 10% CD3-	v2
	Mel-UT-12	Blood	Yes	Yes	Frozen	75% Live CD3+CD8+, 25% Live CD3+CD8	v2
	Mel-UT-13	Lymph node	Yes	–	Frozen	75% Live CD3+CD8+, 15% Live CD3+CD8-, 10% CD3-	v2
	Mel-UT-13	Blood	Yes	–	Frozen	75% Live CD3+CD8+, 25% Live CD3+CD8	v2
	Mel-UT-17	Back	Yes	–	Frozen	75% Live CD3+CD8+, 15% Live CD3+CD8-, 10% CD3-	v1.1
	Mel-UT-17	Blood	Yes	Yes	Frozen	75% Live CD3+CD8+, 25% Live CD3+CD8	v1.1, v2 (CITEseq)
	Mel-UT-18	Brain	Yes	–	Frozen	75% Live CD3+CD8+, 15% Live CD3+CD8-, 10% CD3-	v2
	Mel-UT-18	Blood	Yes	–	Frozen	75% Live CD3+CD8+, 25% Live CD3+CD8	v2

## Sheet: Table S4 - T cell cluster DEGs
Table S4: Differentially expressed genes for all T cell clusters (corresponding to Figure 1B)
	Gene	Cluster	pct.1	pct.2	avg_log2FC	p_val	p_val_adj
	CMC1	CD8.1	0.646	0.283	1.41237	5.56425e-61	1.27188e-56
	KLRD1	CD8.1	0.636	0.258	1.328	1.7653e-59	4.03512e-55
	GZMH	CD8.1	0.777	0.281	1.24837	6.68926e-85	1.52903e-80
	GZMA	CD8.1	0.881	0.452	1.21994	1.92146e-78	4.39207e-74
	NKG7	CD8.1	0.981	0.506	1.14831	3.24728e-108	7.42264e-104
	CCL4	CD8.1	0.533	0.216	1.10821	6.91778e-47	1.58127e-42
	SEPT7	CD8.1	0.271	0.109	1.0372	1.28581e-23	2.9391e-19
	KLRG1	CD8.1	0.546	0.313	1.03596	1.97412e-33	4.51244e-29
	GNLY	CD8.1	0.833	0.324	1.02582	9.09678e-90	2.07934e-85
	CCL5	CD8.1	0.956	0.535	1.01164	3.72246e-83	8.5088e-79
	PLEK	CD8.1	0.487	0.247	0.906583	4.97511e-27	1.13721e-22
	RARRES3	CD8.1	0.222	0.09	0.889163	4.29232e-19	9.81139e-15
	C12orf75	CD8.1	0.524	0.322	0.88033	1.36803e-27	3.12705e-23
	KLRF1	CD8.1	0.254	0.109	0.844052	1.89835e-19	4.33924e-15
	CST7	CD8.1	0.813	0.488	0.843797	1.2975e-50	2.96583e-46
	CD8A	CD8.1	0.695	0.495	0.793077	3.79823e-33	8.682e-29
	AOAH	CD8.1	0.31	0.154	0.789367	4.19031e-15	9.57821e-11
	TRGV10	CD8.1	0.196	0.1	0.778144	7.4612e-07	0.0170548
	HLA-DRB1	CD8.1	0.412	0.225	0.776355	7.05967e-24	1.6137e-19
	ZEB2	CD8.1	0.347	0.168	0.76536	3.75677e-21	8.58722e-17
	SAMD3	CD8.1	0.394	0.253	0.742978	4.73655e-12	1.08268e-07
	GZMB	CD8.1	0.538	0.226	0.733886	1.58998e-33	3.63439e-29
	HLA-DPB1	CD8.1	0.529	0.374	0.692741	1.81531e-18	4.14944e-14
	CTSC	CD8.1	0.491	0.358	0.683927	6.02877e-13	1.37806e-08
	TGFBR3	CD8.1	0.285	0.166	0.683758	8.81767e-11	2.01554e-06
	FCRL6	CD8.1	0.302	0.14	0.673467	1.90256e-13	4.34888e-09
	KLRB1	CD8.1	0.403	0.276	0.658096	1.04081e-11	2.37909e-07
	HOPX	CD8.1	0.426	0.249	0.656922	1.12034e-13	2.56086e-09
	CX3CR1	CD8.1	0.265	0.125	0.653619	6.25749e-13	1.43034e-08
	SRGN	CD8.1	0.758	0.641	0.644983	9.08604e-18	2.07689e-13
	PTPRC	CD8.1	0.907	0.894	0.64488	4.15608e-25	9.49998e-21
	FGFBP2	CD8.1	0.507	0.223	0.635772	2.93064e-29	6.69886e-25
	PTP4A2	CD8.1	0.615	0.561	0.618627	2.4447e-13	5.58809e-09
	CLEC2B	CD8.1	0.514	0.44	0.615693	1.22593e-10	2.80224e-06
	AES	CD8.1	0.194	0.1	0.61293	1.06381e-10	2.43166e-06
	SYNE1	CD8.1	0.383	0.282	0.607197	1.88421e-08	0.000430692
	HLA-DPA1	CD8.1	0.481	0.335	0.60595	8.21504e-11	1.87779e-06
	ZBTB38	CD8.1	0.311	0.233	0.604708	2.57034e-07	0.00587527
	LITAF	CD8.1	0.664	0.598	0.600808	1.35625e-14	3.10012e-10
	LCP1	CD8.1	0.675	0.633	0.593884	1.2954e-10	2.96102e-06
	PYHIN1	CD8.1	0.303	0.211	0.592639	2.88088e-08	0.000658511
	EFHD2	CD8.1	0.497	0.331	0.587292	1.09368e-13	2.49993e-09
	PRF1	CD8.1	0.587	0.344	0.583151	8.31812e-25	1.90136e-20
	GZMM	CD8.1	0.614	0.536	0.579482	2.01618e-18	4.60859e-14
	RAP1B	CD8.1	0.635	0.588	0.572764	8.86156e-10	2.02557e-05
	TPST2	CD8.1	0.352	0.252	0.55632	1.54455e-10	3.53054e-06
	C1orf21	CD8.1	0.231	0.111	0.553993	2.6383e-12	6.03063e-08
	B2M	CD8.1	1	1	0.549233	4.02929e-85	9.21014e-81
	XCL1	CD8.1	0.116	0.046	0.545027	2.05929e-11	4.70712e-07
	KIAA1551	CD8.1	0.145	0.073	0.54174	3.41772e-12	7.81222e-08
	APMAP	CD8.1	0.385	0.278	0.537507	9.81567e-07	0.0224367
	EOMES	CD8.1	0.183	0.093	0.536957	1.9872e-07	0.00454233
	HCST	CD8.1	0.826	0.815	0.534942	5.29763e-20	1.21093e-15
	CTSW	CD8.1	0.689	0.577	0.518224	1.07083e-20	2.4477e-16
	LYAR	CD8.1	0.438	0.326	0.500904	1.57043e-08	0.000358968
	MT-CO1	CD8.1	0.999	0.998	0.490472	5.25083e-40	1.20024e-35
	AHNAK	CD8.1	0.595	0.541	0.469385	1.21749e-06	0.0278293
	MYL12A	CD8.1	0.925	0.94	0.465943	1.09607e-22	2.50541e-18
	MATK	CD8.1	0.343	0.232	0.465037	5.8267e-08	0.00133187
	DUSP2	CD8.1	0.566	0.432	0.461215	5.71897e-13	1.30724e-08
	SEPT6	CD8.1	0.11	0.055	0.458934	3.59118e-07	0.00820871
	CCL4L2	CD8.1	0.128	0.052	0.455243	9.42682e-11	2.15478e-06
	PTGDR	CD8.1	0.221	0.132	0.442244	7.9064e-08	0.00180724
	ITGB2	CD8.1	0.674	0.646	0.4403	1.61974e-09	3.70241e-05
	S1PR5	CD8.1	0.224	0.122	0.436273	2.68021e-10	6.12641e-06
	CD8B	CD8.1	0.62	0.5	0.435237	2.02626e-17	4.63162e-13
	CLIC1	CD8.1	0.663	0.62	0.430791	1.31885e-08	0.000301463
	CYTOR	CD8.1	0.269	0.185	0.429699	1.91187e-07	0.00437015
	FGR	CD8.1	0.19	0.099	0.427828	1.58026e-08	0.000361215
	MYL12B	CD8.1	0.757	0.78	0.427725	1.72598e-08	0.000394524
	FYN	CD8.1	0.48	0.449	0.422951	5.52369e-08	0.00126261
	ARPC2	CD8.1	0.772	0.782	0.420555	1.32607e-08	0.000303114
	SLAMF7	CD8.1	0.16	0.09	0.419391	1.8646e-06	0.042621
	CD160	CD8.1	0.112	0.049	0.413924	1.53233e-06	0.0350261
	IGLV2-14	CD8.1	0.13	0.068	0.410296	2.69759e-12	6.16615e-08
	ACTB	CD8.1	0.993	0.988	0.406322	4.51526e-27	1.0321e-22
	CYBA	CD8.1	0.785	0.802	0.40626	8.7133e-13	1.99169e-08
	ADGRG1	CD8.1	0.247	0.135	0.400771	4.84887e-08	0.00110836
	CD74	CD8.1	0.734	0.71	0.383583	1.74014e-12	3.9776e-08
	CD99	CD8.1	0.715	0.716	0.378211	7.44183e-12	1.70105e-07
	PATL2	CD8.1	0.153	0.102	0.376786	1.37168e-06	0.031354
	MAP3K8	CD8.1	0.185	0.119	0.375737	5.10979e-07	0.01168
	SH3BGRL3	CD8.1	0.906	0.923	0.361474	1.85786e-25	4.2467e-21
	TBX21	CD8.1	0.239	0.152	0.361257	8.75878e-08	0.00200208
	PFN1	CD8.1	0.938	0.947	0.353872	1.71802e-20	3.92704e-16
	S100A4	CD8.1	0.908	0.847	0.337321	1.9884e-19	4.54508e-15
	MYL6	CD8.1	0.809	0.851	0.327482	2.96791e-10	6.78404e-06
	MT1E	CD8.1	0.124	0.078	0.315115	8.4668e-07	0.0193534
	HLA-DRB5	CD8.1	0.176	0.114	0.311905	2.48792e-07	0.00568688
	MT-CO2	CD8.1	0.998	0.998	0.289713	1.24253e-15	2.84017e-11
	CALM1	CD8.1	0.863	0.903	0.282301	1.22854e-12	2.80819e-08
	HLA-B	CD8.1	0.994	0.985	0.265297	1.08568e-17	2.48165e-13
	CFL1	CD8.1	0.874	0.913	0.262008	5.26321e-10	1.20307e-05
	FGFBP2	CD8.2	0.886	0.177	2.38687	4.64687e-222	1.06218e-217
	GZMB	CD8.2	0.854	0.191	2.12547	4.45772e-184	1.01895e-179
	GZMH	CD8.2	0.914	0.281	1.9824	4.11776e-175	9.41237e-171
	SPON2	CD8.2	0.556	0.115	1.80237	2.57201e-115	5.87909e-111
	PRF1	CD8.2	0.838	0.316	1.78533	2.61168e-149	5.96978e-145
	GNLY	CD8.2	0.977	0.323	1.78298	1.81451e-159	4.14762e-155
	NKG7	CD8.2	0.995	0.524	1.6802	2.52293e-181	5.76691e-177
	ZNF683	CD8.2	0.333	0.035	1.61447	1.05833e-63	2.41914e-59
	PRSS23	CD8.2	0.495	0.066	1.56296	6.5124e-101	1.48861e-96
	ADGRG1	CD8.2	0.532	0.096	1.49894	1.24775e-105	2.85212e-101
	EFHD2	CD8.2	0.721	0.304	1.48959	4.20049e-110	9.60149e-106
	FCGR3A	CD8.2	0.498	0.101	1.48184	4.6465e-86	1.0621e-81
	CX3CR1	CD8.2	0.477	0.099	1.36464	2.38993e-76	5.4629e-72
	CST7	CD8.2	0.914	0.486	1.33295	3.4344e-128	7.85036e-124
	MTRNR2L8	CD8.2	0.234	0.126	1.31133	7.99892e-13	1.82839e-08
	LGALS1	CD8.2	0.601	0.277	1.22163	1.57396e-58	3.59775e-54
	ZEB2	CD8.2	0.526	0.148	1.20572	5.66814e-68	1.29562e-63
	KLRD1	CD8.2	0.715	0.262	1.1658	6.81691e-76	1.55821e-71
	ASCL2	CD8.2	0.33	0.038	1.16416	6.00943e-82	1.37363e-77
	PLEK	CD8.2	0.625	0.236	1.15106	1.70944e-68	3.90744e-64
	TBX21	CD8.2	0.436	0.126	1.06692	4.74673e-61	1.08501e-56
	CCL5	CD8.2	0.968	0.551	1.00367	2.7532e-88	6.29326e-84
	CTSW	CD8.2	0.817	0.562	0.991332	9.38359e-60	2.1449e-55
	GZMA	CD8.2	0.901	0.467	0.989338	2.02022e-75	4.61781e-71
	ITGB2	CD8.2	0.822	0.625	0.989159	1.38495e-69	3.16571e-65
	FCRL6	CD8.2	0.434	0.127	0.987732	1.23623e-57	2.82578e-53
	CD8A	CD8.2	0.753	0.494	0.971295	8.76265e-60	2.00297e-55
	TTC38	CD8.2	0.312	0.072	0.919012	4.94461e-45	1.13024e-40
	ITGB1	CD8.2	0.64	0.367	0.918693	5.11647e-49	1.16952e-44
	CTSC	CD8.2	0.612	0.345	0.894395	2.28305e-45	5.2186e-41
	CCL4	CD8.2	0.537	0.229	0.892351	6.46352e-46	1.47743e-41
	C12orf75	CD8.2	0.618	0.316	0.883802	7.68707e-47	1.75711e-42
	HOPX	CD8.2	0.491	0.246	0.877638	2.22136e-31	5.07759e-27
	SH3BGRL3	CD8.2	0.966	0.913	0.870188	5.03878e-100	1.15176e-95
	CLIC3	CD8.2	0.302	0.105	0.858422	4.02317e-29	9.19617e-25
	ABHD17A	CD8.2	0.565	0.365	0.854137	1.10371e-40	2.52286e-36
	RAP1B	CD8.2	0.769	0.57	0.853728	6.21368e-52	1.42032e-47
	SLC9A3R1	CD8.2	0.674	0.46	0.850772	8.71234e-48	1.99147e-43
	TGFBR3	CD8.2	0.391	0.155	0.84997	4.43225e-35	1.01312e-30
	S1PR5	CD8.2	0.351	0.107	0.840365	1.14819e-35	2.62454e-31
	FLNA	CD8.2	0.658	0.459	0.838119	3.87846e-34	8.86538e-30
	S100A4	CD8.2	0.967	0.84	0.825403	1.80223e-73	4.11955e-69
	APOBEC3G	CD8.2	0.448	0.215	0.812194	2.4382e-30	5.57323e-26
	C1orf21	CD8.2	0.332	0.101	0.803944	4.99931e-32	1.14274e-27
	CYBA	CD8.2	0.885	0.786	0.79978	2.46136e-62	5.62619e-58
	LAIR2	CD8.2	0.224	0.062	0.799038	7.30471e-27	1.66971e-22
	CD99	CD8.2	0.839	0.696	0.770158	1.9185e-56	4.38531e-52
	TPST2	CD8.2	0.462	0.239	0.760201	3.1592e-27	7.22129e-23
	SYNGR1	CD8.2	0.196	0.033	0.754781	8.67012e-32	1.98182e-27
	CLIC1	CD8.2	0.786	0.603	0.745209	1.57268e-44	3.59483e-40
	ARPC2	CD8.2	0.879	0.765	0.74236	1.53378e-57	3.50591e-53
	LITAF	CD8.2	0.771	0.585	0.73439	1.91438e-38	4.37589e-34
	ABI3	CD8.2	0.314	0.115	0.731489	3.85974e-30	8.82258e-26
	TRGV2	CD8.2	0.169	0.059	0.728	2.59442e-13	5.93032e-09
	FGR	CD8.2	0.29	0.088	0.72577	2.02536e-29	4.62957e-25
	TYROBP	CD8.2	0.186	0.09	0.725005	5.67138e-16	1.29636e-11
	MATK	CD8.2	0.441	0.222	0.710379	5.79917e-28	1.32557e-23
	SPN	CD8.2	0.446	0.27	0.709867	2.21495e-21	5.06294e-17
	APMAP	CD8.2	0.486	0.267	0.707087	7.24648e-28	1.6564e-23
	GSTP1	CD8.2	0.619	0.435	0.697574	1.61624e-29	3.69441e-25
	MYO1F	CD8.2	0.396	0.204	0.685122	4.81514e-23	1.10064e-18
	TGFB1	CD8.2	0.652	0.508	0.682567	2.36974e-28	5.41676e-24
	LSP1	CD8.2	0.789	0.698	0.68016	1.18174e-33	2.70122e-29
	GNG2	CD8.2	0.49	0.309	0.673799	2.9483e-25	6.73923e-21
	SSBP4	CD8.2	0.459	0.295	0.672369	2.7838e-25	6.36321e-21
	DSTN	CD8.2	0.475	0.311	0.671734	2.16188e-22	4.94162e-18
	RASSF1	CD8.2	0.414	0.228	0.668214	2.40588e-22	5.49935e-18
	ITGAM	CD8.2	0.194	0.043	0.667723	2.19003e-23	5.00597e-19
	HLA-DPB1	CD8.2	0.598	0.37	0.663654	3.27214e-24	7.47946e-20
	PFN1	CD8.2	0.972	0.942	0.655327	1.77117e-68	4.04854e-64
	CEP78	CD8.2	0.262	0.104	0.650963	1.02287e-19	2.33808e-15
	CTSD	CD8.2	0.428	0.282	0.64958	2.71969e-22	6.21666e-18
	CHST12	CD8.2	0.339	0.161	0.646174	2.2693e-22	5.18716e-18
	CD247	CD8.2	0.552	0.421	0.645108	7.47034e-23	1.70757e-18
	MTSS1	CD8.2	0.216	0.061	0.644735	7.56528e-29	1.72927e-24
	CD8B	CD8.2	0.687	0.495	0.644541	4.65314e-27	1.06362e-22
	ACTB	CD8.2	0.997	0.988	0.642109	2.08467e-42	4.76514e-38
	KLRK1	CD8.2	0.516	0.329	0.640168	5.36589e-20	1.22653e-15
	CALR	CD8.2	0.598	0.506	0.633752	6.08047e-21	1.38987e-16
	CD63	CD8.2	0.454	0.285	0.629864	7.86044e-19	1.79674e-14
	PTGDR	CD8.2	0.295	0.125	0.627938	5.336e-16	1.2197e-11
	CD81	CD8.2	0.515	0.374	0.615787	1.48999e-20	3.40582e-16
	DBI	CD8.2	0.569	0.423	0.613599	5.80175e-25	1.32616e-20
	MSN	CD8.2	0.596	0.455	0.613467	1.4426e-18	3.2975e-14
	IFITM2	CD8.2	0.757	0.707	0.612412	2.38451e-19	5.45051e-15
	SRGN	CD8.2	0.814	0.637	0.610791	8.09533e-31	1.85043e-26
	YWHAQ	CD8.2	0.558	0.398	0.610039	1.96111e-17	4.48272e-13
	PPP1CA	CD8.2	0.673	0.541	0.608776	9.71745e-27	2.22122e-22
	HCST	CD8.2	0.892	0.805	0.607149	7.6206e-43	1.74192e-38
	ADRB2	CD8.2	0.244	0.086	0.604215	2.80592e-26	6.41378e-22
	CD3G	CD8.2	0.707	0.614	0.603994	1.09511e-28	2.5032e-24
	HLA-C	CD8.2	0.992	0.977	0.600977	2.78297e-79	6.36132e-75
	GNPTAB	CD8.2	0.263	0.124	0.599393	3.48282e-19	7.96102e-15
	GZMM	CD8.2	0.697	0.526	0.594837	1.94317e-31	4.44169e-27
	SYNE1	CD8.2	0.448	0.277	0.59132	1.79087e-25	4.09357e-21
	EMP3	CD8.2	0.828	0.732	0.580678	4.35638e-24	9.95782e-20
	S100A6	CD8.2	0.894	0.837	0.574594	2.00062e-33	4.57302e-29
	ADGRE5	CD8.2	0.439	0.313	0.570121	1.11589e-16	2.55071e-12
	PPP1R18	CD8.2	0.507	0.36	0.569776	8.5444e-22	1.95308e-17
	PLEKHF1	CD8.2	0.216	0.084	0.567095	1.57897e-12	3.60921e-08
	CAP1	CD8.2	0.624	0.499	0.566621	6.0706e-15	1.38762e-10
	MYO1G	CD8.2	0.431	0.289	0.565666	5.39866e-18	1.23403e-13
	DHRS7	CD8.2	0.525	0.388	0.565313	2.30505e-15	5.26888e-11
	VCL	CD8.2	0.221	0.091	0.564699	7.87151e-14	1.79927e-09
	CDK2AP2	CD8.2	0.363	0.231	0.563361	1.1811e-15	2.69975e-11
	DOK2	CD8.2	0.411	0.265	0.56326	2.97164e-17	6.79258e-13
	MXRA7	CD8.2	0.218	0.077	0.558415	4.16971e-29	9.53113e-25
	BIN2	CD8.2	0.617	0.501	0.557892	1.80847e-20	4.13379e-16
	ITGAL	CD8.2	0.357	0.216	0.556765	3.43409e-15	7.84964e-11
	PYHIN1	CD8.2	0.365	0.206	0.549908	1.03434e-10	2.3643e-06
	MYBL1	CD8.2	0.317	0.168	0.549068	4.1259e-19	9.43097e-15
	SAMD3	CD8.2	0.431	0.254	0.548559	5.8422e-16	1.33541e-11
	PROK2	CD8.2	0.123	0.009	0.548526	2.11968e-27	4.84517e-23
	HLA-DPA1	CD8.2	0.537	0.333	0.545526	2.25395e-25	5.15207e-21
	LILRB1	CD8.2	0.164	0.032	0.545505	6.35436e-24	1.45248e-19
	KLRC4	CD8.2	0.279	0.147	0.541638	5.29223e-15	1.2097e-10
	RHOC	CD8.2	0.312	0.17	0.540927	1.37545e-23	3.14399e-19
	CD320	CD8.2	0.27	0.154	0.540246	1.05693e-18	2.41594e-14
	TNFRSF1B	CD8.2	0.304	0.17	0.535971	9.3394e-17	2.1348e-12
	LCP1	CD8.2	0.736	0.625	0.535627	6.76487e-22	1.54631e-17
	MYL6	CD8.2	0.891	0.837	0.535408	5.19381e-34	1.1872e-29
	CFL1	CD8.2	0.937	0.902	0.531822	2.93836e-38	6.7165e-34
	GNAI2	CD8.2	0.58	0.471	0.529029	4.66518e-19	1.06637e-14
	ARL4C	CD8.2	0.704	0.578	0.528787	6.32711e-15	1.44625e-10
	TLN1	CD8.2	0.47	0.346	0.526305	1.14534e-17	2.61802e-13
	SSBP3	CD8.2	0.225	0.102	0.521779	2.45667e-15	5.61546e-11
	HLA-A	CD8.2	0.982	0.965	0.519112	6.70505e-55	1.53264e-50
	LY6E	CD8.2	0.659	0.576	0.51763	9.29105e-12	2.12375e-07
	OSTF1	CD8.2	0.441	0.32	0.512798	9.22789e-18	2.10931e-13
	SCP2	CD8.2	0.407	0.287	0.510671	1.08505e-07	0.00248021
	GPR141	CD8.2	0.132	0.021	0.508456	1.09289e-23	2.49812e-19
	CD53	CD8.2	0.603	0.484	0.506748	8.27505e-18	1.89151e-13
	NDUFB7	CD8.2	0.482	0.376	0.505905	2.62441e-14	5.99888e-10
	PAXX	CD8.2	0.578	0.458	0.505393	7.38184e-20	1.68734e-15
	PTMS	CD8.2	0.189	0.075	0.503195	3.23296e-18	7.3899e-14
	B2M	CD8.2	1	1	0.502555	2.44457e-89	5.58779e-85
	MYL12B	CD8.2	0.837	0.767	0.502282	3.22778e-25	7.37806e-21
	SH2D2A	CD8.2	0.327	0.206	0.501196	4.42692e-14	1.01191e-09
	CISD3	CD8.2	0.275	0.163	0.499444	1.13992e-11	2.60562e-07
	AHNAK	CD8.2	0.676	0.531	0.498377	5.73814e-16	1.31162e-11
	ACTN4	CD8.2	0.3	0.178	0.494141	2.53542e-12	5.79546e-08
	PTP4A2	CD8.2	0.683	0.553	0.493919	4.52437e-16	1.03418e-11
	AKR1C3	CD8.2	0.115	0.018	0.492833	1.23529e-13	2.82362e-09
	RAP2A	CD8.2	0.168	0.051	0.491435	1.69433e-19	3.87289e-15
	MBP	CD8.2	0.524	0.407	0.489507	2.14262e-09	4.89761e-05
	AGTRAP	CD8.2	0.264	0.149	0.489397	1.03967e-12	2.37647e-08
	HLA-B	CD8.2	0.996	0.985	0.4858	1.96477e-78	4.49107e-74
	DYNLL1	CD8.2	0.363	0.262	0.481587	1.07849e-11	2.46521e-07
	CAPNS1	CD8.2	0.374	0.265	0.481271	1.59236e-10	3.63982e-06
	TSEN54	CD8.2	0.324	0.203	0.480385	6.87648e-16	1.57183e-11
	ACTR3	CD8.2	0.577	0.489	0.479798	1.02615e-09	2.34558e-05
	LINC02384	CD8.2	0.125	0.025	0.479367	3.71159e-17	8.48396e-13
	FAM49B	CD8.2	0.436	0.329	0.478183	5.55118e-12	1.26889e-07
	SASH3	CD8.2	0.331	0.217	0.478132	2.90668e-11	6.64409e-07
	AOAH	CD8.2	0.293	0.163	0.47703	1.03964e-14	2.37641e-10
	IQGAP1	CD8.2	0.426	0.319	0.476725	3.8266e-11	8.74685e-07
	CALM1	CD8.2	0.928	0.892	0.475836	1.77284e-35	4.05236e-31
	TRG-AS1	CD8.2	0.275	0.171	0.473577	1.1523e-11	2.63392e-07
	CYTOR	CD8.2	0.322	0.181	0.473	1.01063e-19	2.3101e-15
	F2R	CD8.2	0.2	0.078	0.472947	2.78523e-14	6.36648e-10
	ATP2B4	CD8.2	0.28	0.167	0.470152	2.99475e-17	6.8454e-13
	ARPC5	CD8.2	0.562	0.465	0.468549	3.09735e-12	7.07993e-08
	MT2A	CD8.2	0.57	0.459	0.46681	1.10663e-08	0.000252953
	PXN	CD8.2	0.297	0.193	0.466793	2.04079e-08	0.000466484
	ARPC5L	CD8.2	0.445	0.322	0.466052	1.993e-11	4.55561e-07
	WDR1	CD8.2	0.486	0.394	0.465557	1.2981e-11	2.9672e-07
	ITGB7	CD8.2	0.39	0.293	0.463156	6.88762e-08	0.00157437
	RHOA	CD8.2	0.795	0.737	0.462971	4.69515e-15	1.07322e-10
	ANXA1	CD8.2	0.77	0.625	0.462469	2.53357e-13	5.79123e-09
	UCP2	CD8.2	0.641	0.552	0.461792	4.81427e-11	1.10045e-06
	PDIA3	CD8.2	0.608	0.529	0.458991	6.5776e-18	1.50351e-13
	CD52	CD8.2	0.903	0.874	0.454953	2.74888e-22	6.28339e-18
	DNAJC1	CD8.2	0.308	0.191	0.454656	3.54638e-13	8.10631e-09
	ID2	CD8.2	0.443	0.32	0.45416	1.40593e-08	0.000321368
	MYL12A	CD8.2	0.959	0.934	0.453139	6.37502e-32	1.4572e-27
	SYTL3	CD8.2	0.301	0.188	0.447218	1.24308e-08	0.000284143
	KLRF1	CD8.2	0.211	0.121	0.446608	2.37971e-07	0.00543954
	CES1	CD8.2	0.11	0.015	0.443822	9.14699e-20	2.09082e-15
	ANXA2	CD8.2	0.47	0.334	0.443804	1.91508e-10	4.3775e-06
	IGF2R	CD8.2	0.242	0.137	0.443024	7.88447e-13	1.80223e-08
	PTPN12	CD8.2	0.16	0.063	0.442014	3.09523e-16	7.07508e-12
	KLRB1	CD8.2	0.421	0.279	0.441028	1.57318e-11	3.59598e-07
	UBB	CD8.2	0.761	0.7	0.440383	2.22244e-17	5.08006e-13
	BLOC1S1	CD8.2	0.445	0.351	0.440335	8.61994e-12	1.97034e-07
	CD300A	CD8.2	0.188	0.096	0.438474	8.08913e-09	0.000184901
	BSG	CD8.2	0.463	0.37	0.434921	8.46524e-11	1.93499e-06
	PTPN18	CD8.2	0.235	0.135	0.434177	1.47039e-08	0.000336102
	JAZF1	CD8.2	0.176	0.075	0.433701	2.76318e-14	6.31608e-10
	SYNE2	CD8.2	0.576	0.464	0.433558	1.91365e-09	4.37422e-05
	ANXA6	CD8.2	0.572	0.489	0.432693	1.01279e-09	2.31504e-05
	PTPRC	CD8.2	0.929	0.891	0.432195	1.77526e-20	4.05788e-16
	SUN2	CD8.2	0.548	0.472	0.431766	2.01249e-10	4.60014e-06
	CLEC2B	CD8.2	0.557	0.436	0.431518	1.81385e-11	4.14611e-07
	SLC15A4	CD8.2	0.165	0.063	0.430734	5.87946e-20	1.34393e-15
	ACTG1	CD8.2	0.929	0.902	0.4288	1.48495e-11	3.39431e-07
	RNF213	CD8.2	0.549	0.465	0.427661	1.368e-10	3.12697e-06
	RPS6KA1	CD8.2	0.25	0.155	0.423228	1.36739e-08	0.000312558
	IL2RG	CD8.2	0.663	0.635	0.423123	4.39843e-15	1.00539e-10
	CD3D	CD8.2	0.784	0.766	0.422928	1.14279e-12	2.61218e-08
	RAB5IF	CD8.2	0.332	0.233	0.421489	2.95405e-08	0.000675236
	IQGAP2	CD8.2	0.339	0.241	0.420513	5.55859e-08	0.00127058
	LPCAT1	CD8.2	0.191	0.088	0.418645	4.91216e-12	1.12282e-07
	RAC2	CD8.2	0.817	0.772	0.418474	9.52646e-13	2.17756e-08
	ARPC4	CD8.2	0.422	0.351	0.418287	1.51968e-13	3.47368e-09
	CAST	CD8.2	0.498	0.412	0.418219	7.91719e-07	0.0180971
	CCND3	CD8.2	0.644	0.588	0.418068	1.74158e-15	3.98091e-11
	GK5	CD8.2	0.15	0.064	0.416984	1.53882e-11	3.51743e-07
	SELPLG	CD8.2	0.506	0.421	0.415496	1.7447e-08	0.000398804
	CDC42EP3	CD8.2	0.281	0.186	0.414625	4.29595e-07	0.00981969
	PPP2R5C	CD8.2	0.521	0.419	0.414242	1.06827e-07	0.00244185
	ARL6IP1	CD8.2	0.479	0.403	0.412928	1.54081e-08	0.000352199
	PSMB9	CD8.2	0.666	0.588	0.411383	9.70664e-13	2.21874e-08
	BHLHE40	CD8.2	0.255	0.153	0.411052	7.23712e-09	0.000165426
	PPIB	CD8.2	0.746	0.688	0.410875	3.50427e-12	8.01005e-08
	PSMB10	CD8.2	0.505	0.428	0.410287	1.22703e-09	2.80475e-05
	PATL2	CD8.2	0.189	0.098	0.410161	7.12293e-13	1.62816e-08
	ZAP70	CD8.2	0.485	0.412	0.409519	1.84452e-10	4.2162e-06
	POMP	CD8.2	0.421	0.334	0.409297	3.08959e-07	0.00706219
	MAPK1	CD8.2	0.27	0.177	0.408167	2.51878e-10	5.75743e-06
	PGAM1	CD8.2	0.467	0.385	0.407734	3.2827e-14	7.5036e-10
	UBE2F	CD8.2	0.236	0.145	0.407541	2.89495e-11	6.61728e-07
	HSP90B1	CD8.2	0.625	0.554	0.40437	1.87124e-09	4.27729e-05
	GAB3	CD8.2	0.164	0.07	0.403575	1.6408e-09	3.75054e-05
	LAIR1	CD8.2	0.186	0.095	0.403125	1.1708e-16	2.67622e-12
	MAPRE2	CD8.2	0.322	0.235	0.402875	1.15316e-07	0.00263589
	PLAAT4	CD8.2	0.565	0.531	0.402159	2.07571e-08	0.000474465
	MCTP2	CD8.2	0.168	0.076	0.401178	1.04601e-09	2.39096e-05
	CD226	CD8.2	0.155	0.082	0.398798	6.70295e-08	0.00153216
	HLA-DRB1	CD8.2	0.4	0.235	0.398265	5.08482e-17	1.16229e-12
	PPP2R2B	CD8.2	0.171	0.075	0.396603	2.23564e-12	5.11024e-08
	RNF167	CD8.2	0.399	0.317	0.396602	5.45776e-11	1.24753e-06
	PRELID1	CD8.2	0.464	0.393	0.396379	2.65116e-10	6.06001e-06
	FUT11	CD8.2	0.151	0.064	0.396266	3.91643e-11	8.95218e-07
	OASL	CD8.2	0.132	0.039	0.395945	3.56158e-14	8.14105e-10
	KLRG1	CD8.2	0.472	0.335	0.39483	1.06133e-10	2.42598e-06
	RUNX3	CD8.2	0.305	0.21	0.394074	5.06177e-08	0.00115702
	TFDP2	CD8.2	0.207	0.122	0.393917	7.6428e-09	0.000174699
	PRR5L	CD8.2	0.142	0.048	0.39371	3.973e-12	9.08147e-08
	PSAP	CD8.2	0.417	0.351	0.393448	7.86097e-08	0.00179686
	NDUFB2	CD8.2	0.558	0.499	0.390418	1.03552e-11	2.367e-07
	APOBEC3C	CD8.2	0.2	0.112	0.388579	1.77057e-10	4.04717e-06
	PRR5	CD8.2	0.233	0.138	0.388296	7.31283e-09	0.000167157
	MIR4435-2HG	CD8.2	0.158	0.072	0.38762	2.51395e-08	0.000574639
	IDH2	CD8.2	0.305	0.213	0.387248	7.52667e-07	0.0172045
	TBCB	CD8.2	0.415	0.334	0.387201	2.67017e-09	6.10348e-05
	ARL6IP5	CD8.2	0.712	0.642	0.386929	4.62878e-13	1.05805e-08
	ARPC3	CD8.2	0.771	0.725	0.386194	5.78932e-14	1.32332e-09
	YWHAZ	CD8.2	0.818	0.765	0.38517	3.49223e-12	7.98254e-08
	SELENOT	CD8.2	0.371	0.294	0.384331	3.48967e-09	7.97668e-05
	GLUL	CD8.2	0.18	0.102	0.384182	7.67011e-07	0.0175323
	TPM3	CD8.2	0.758	0.708	0.384083	2.45348e-12	5.60817e-08
	LLGL2	CD8.2	0.155	0.063	0.383877	1.37057e-11	3.13285e-07
	RAC1	CD8.2	0.456	0.378	0.383324	2.74952e-07	0.00628486
	FBXW5	CD8.2	0.338	0.254	0.38319	7.77108e-14	1.77631e-09
	DIP2A	CD8.2	0.217	0.134	0.382146	3.07853e-08	0.00070369
	TBC1D10C	CD8.2	0.542	0.478	0.381886	2.56874e-07	0.00587162
	APLP2	CD8.2	0.165	0.079	0.381601	8.17212e-10	1.86798e-05
	BATF	CD8.2	0.222	0.135	0.379351	5.90008e-12	1.34864e-07
	SLAMF7	CD8.2	0.186	0.089	0.379303	7.65529e-09	0.000174985
	RAB29	CD8.2	0.272	0.189	0.378644	8.7231e-08	0.00199393
	HLA-E	CD8.2	0.921	0.905	0.378173	6.93389e-28	1.58495e-23
	TSPAN2	CD8.2	0.117	0.041	0.375043	4.4155e-10	1.0093e-05
	STOM	CD8.2	0.258	0.165	0.373776	8.09572e-10	1.85052e-05
	DDOST	CD8.2	0.437	0.367	0.373579	1.76864e-07	0.00404275
	PRKCB	CD8.2	0.332	0.251	0.372791	1.04859e-06	0.0239687
	BRK1	CD8.2	0.535	0.465	0.371517	6.01407e-09	0.00013747
	BTN3A2	CD8.2	0.348	0.274	0.371409	8.20567e-09	0.000187565
	STK10	CD8.2	0.335	0.257	0.370287	1.27431e-08	0.000291281
	SRSF9	CD8.2	0.453	0.377	0.370097	4.41658e-07	0.0100954
	MT1E	CD8.2	0.15	0.076	0.368609	1.68261e-07	0.0038461
	CARD16	CD8.2	0.33	0.256	0.368605	1.15878e-07	0.00264873
	USP28	CD8.2	0.154	0.067	0.367521	3.84804e-08	0.000879584
	ANXA4	CD8.2	0.149	0.071	0.366106	1.03499e-06	0.0236579
	GLIPR2	CD8.2	0.222	0.148	0.363092	1.85485e-06	0.0423982
	RAB1B	CD8.2	0.305	0.229	0.361354	2.82709e-07	0.00646217
	ITGA4	CD8.2	0.523	0.418	0.360785	1.56177e-10	3.56989e-06
	PTPRE	CD8.2	0.183	0.106	0.36008	8.89709e-09	0.00020337
	C5orf56	CD8.2	0.24	0.165	0.359952	1.76317e-08	0.000403026
	HMGN3	CD8.2	0.447	0.375	0.35887	2.22438e-07	0.00508449
	RABAC1	CD8.2	0.49	0.42	0.358669	2.73475e-07	0.00625109
	TMEM50A	CD8.2	0.496	0.426	0.358641	1.81027e-07	0.00413793
	MXD4	CD8.2	0.202	0.121	0.356199	1.32667e-09	3.03249e-05
	CCDC88C	CD8.2	0.315	0.244	0.354837	1.7239e-07	0.00394049
	PKN1	CD8.2	0.306	0.235	0.352709	4.01606e-07	0.00917991
	PSMA7	CD8.2	0.554	0.498	0.352579	5.97378e-10	1.36549e-05
	CDC42	CD8.2	0.652	0.602	0.349387	1.92891e-11	4.4091e-07
	TTC16	CD8.2	0.134	0.053	0.349198	6.11571e-10	1.39793e-05
	ARF6	CD8.2	0.497	0.434	0.347065	2.88587e-09	6.59653e-05
	MFSD10	CD8.2	0.324	0.251	0.345762	1.91604e-08	0.000437967
	FERMT3	CD8.2	0.318	0.252	0.345154	3.57834e-07	0.00817937
	H3F3A	CD8.2	0.885	0.851	0.344627	5.05845e-12	1.15626e-07
	CYB561D2	CD8.2	0.225	0.148	0.34283	1.09567e-09	2.50449e-05
	SYTL2	CD8.2	0.174	0.1	0.342363	2.46329e-11	5.63058e-07
	PLEKHG3	CD8.2	0.114	0.039	0.342173	1.18698e-10	2.71319e-06
	SLC20A1	CD8.2	0.184	0.111	0.341627	9.34312e-08	0.00213565
	TAP1	CD8.2	0.366	0.301	0.341402	3.48316e-07	0.00796181
	CD58	CD8.2	0.175	0.098	0.341232	4.42594e-08	0.00101168
	ORAI1	CD8.2	0.326	0.26	0.34097	6.4981e-08	0.00148534
	CAPN2	CD8.2	0.372	0.308	0.340535	2.52721e-07	0.0057767
	MACF1	CD8.2	0.357	0.297	0.33963	9.48524e-07	0.0216814
	TMED9	CD8.2	0.329	0.263	0.338889	1.05704e-08	0.000241618
	TMBIM6	CD8.2	0.62	0.572	0.337987	4.04401e-10	9.2438e-06
	LAG3	CD8.2	0.182	0.103	0.336466	1.78319e-07	0.00407601
	CD164	CD8.2	0.381	0.325	0.333857	2.17994e-08	0.000498291
	SRRT	CD8.2	0.238	0.171	0.332824	4.40337e-07	0.0100652
	PPP3CC	CD8.2	0.357	0.291	0.329846	1.63352e-06	0.0373391
	PIP4K2A	CD8.2	0.34	0.265	0.328105	1.29667e-08	0.000296393
	RGS9	CD8.2	0.107	0.029	0.327742	2.80907e-14	6.42097e-10
	PLAAT3	CD8.2	0.164	0.08	0.325816	6.08392e-10	1.39066e-05
	THEMIS2	CD8.2	0.133	0.066	0.325362	9.65417e-12	2.20675e-07
	ADAM8	CD8.2	0.211	0.141	0.325002	1.52998e-07	0.00349722
	SYT11	CD8.2	0.143	0.07	0.324342	3.88634e-07	0.00888339
	RAP1GAP2	CD8.2	0.133	0.062	0.323941	7.42226e-08	0.00169658
	IFITM1	CD8.2	0.934	0.906	0.323667	2.29882e-16	5.25463e-12
	HSPA5	CD8.2	0.503	0.456	0.32312	1.68443e-09	3.85027e-05
	GNB2	CD8.2	0.466	0.411	0.323095	3.33132e-08	0.000761473
	SERF2	CD8.2	0.902	0.89	0.318562	2.96623e-21	6.78021e-17
	TLE5	CD8.2	0.651	0.664	0.313894	4.79545e-07	0.0109614
	PEPD	CD8.2	0.212	0.149	0.312528	5.46575e-07	0.0124936
	PSMB3	CD8.2	0.395	0.342	0.312156	8.42399e-09	0.000192556
	ARRB2	CD8.2	0.421	0.367	0.31177	4.85589e-08	0.00110996
	TRAPPC10	CD8.2	0.204	0.141	0.311253	1.47424e-06	0.0336981
	CD244	CD8.2	0.13	0.057	0.310495	7.15709e-09	0.000163597
	RAB37	CD8.2	0.182	0.113	0.310341	1.39538e-08	0.000318956
	SUB1	CD8.2	0.701	0.66	0.308884	1.80306e-07	0.00412145
	LMAN2	CD8.2	0.372	0.316	0.308423	1.73638e-06	0.0396902
	PSMA6	CD8.2	0.385	0.335	0.307191	1.22572e-08	0.000280174
	TOX	CD8.2	0.14	0.069	0.306345	9.15677e-07	0.0209305
	RAPGEF1	CD8.2	0.153	0.086	0.304965	1.33411e-06	0.0304952
	ATP6V0B	CD8.2	0.315	0.26	0.30494	1.16319e-09	2.65881e-05
	CST3	CD8.2	0.108	0.035	0.30478	1.19721e-13	2.73659e-09
	TMSB4X	CD8.2	0.999	0.997	0.302323	2.8173e-35	6.43979e-31
	SLC25A20	CD8.2	0.136	0.072	0.301673	2.13046e-09	4.86981e-05
	VAV3	CD8.2	0.136	0.067	0.299728	1.1031e-09	2.52148e-05
	OSBPL5	CD8.2	0.1	0.03	0.299673	2.47904e-11	5.6666e-07
	G6PD	CD8.2	0.199	0.137	0.298966	1.13115e-07	0.00258558
	RALY	CD8.2	0.426	0.381	0.298064	6.37768e-07	0.0145781
	UBC	CD8.2	0.867	0.854	0.297473	9.47962e-14	2.16685e-09
	TRGC2	CD8.2	0.122	0.061	0.297083	1.78237e-06	0.0407415
	RGS3	CD8.2	0.117	0.054	0.29605	8.01192e-08	0.00183137
	IL32	CD8.2	0.921	0.896	0.2954	2.22086e-13	5.07644e-09
	PARP15	CD8.2	0.182	0.119	0.291696	1.02558e-07	0.00234428
	PPIA	CD8.2	0.922	0.9	0.291172	2.55962e-12	5.85077e-08
	RABGAP1L	CD8.2	0.267	0.204	0.289702	6.24008e-07	0.0142636
	KLF2	CD8.2	0.787	0.777	0.289205	2.59358e-10	5.9284e-06
	PARK7	CD8.2	0.537	0.494	0.287634	2.47489e-07	0.00565711
	CORO1A	CD8.2	0.822	0.807	0.287248	1.58985e-07	0.00363408
	P4HB	CD8.2	0.419	0.374	0.287139	1.5517e-06	0.0354688
	METRNL	CD8.2	0.114	0.049	0.284935	2.08717e-09	4.77085e-05
	CRIP1	CD8.2	0.711	0.651	0.283148	5.5778e-13	1.27497e-08
	TXNL4A	CD8.2	0.349	0.298	0.282198	1.98281e-09	4.53232e-05
	IL2RB	CD8.2	0.229	0.163	0.281579	9.81977e-07	0.022446
	PDLIM2	CD8.2	0.262	0.21	0.28102	1.69541e-07	0.00387537
	SERTAD3	CD8.2	0.11	0.048	0.280382	1.3996e-07	0.0031992
	AC090152.1	CD8.2	0.107	0.044	0.279665	1.03147e-09	2.35774e-05
	EBP	CD8.2	0.16	0.103	0.27698	3.4508e-08	0.000788784
	GAPDH	CD8.2	0.881	0.856	0.267598	1.78242e-10	4.07425e-06
	PSMB6	CD8.2	0.363	0.318	0.267064	1.56235e-06	0.0357123
	MAN1A1	CD8.2	0.1	0.048	0.26488	1.95484e-08	0.000446837
	PPP2R5A	CD8.2	0.188	0.139	0.264462	7.92912e-08	0.00181244
	KCNAB2	CD8.2	0.227	0.18	0.263951	5.63532e-09	0.000128812
	OAZ1	CD8.2	0.793	0.778	0.259679	2.03195e-08	0.000464464
	SPSB3	CD8.2	0.322	0.284	0.254702	1.97667e-06	0.0451828
	LINC02446	CD8.3	0.634	0.109	1.95537	3.0506e-120	6.97306e-116
	CCR7	CD8.3	0.646	0.199	1.29125	2.52496e-95	5.77155e-91
	LEF1	CD8.3	0.663	0.263	1.04575	6.15998e-78	1.40805e-73
	AIF1	CD8.3	0.397	0.069	1.03152	7.07517e-72	1.61724e-67
	SNHG29	CD8.3	0.811	0.586	0.970533	5.14866e-60	1.17688e-55
	S100B	CD8.3	0.18	0.019	0.966431	5.07331e-28	1.15966e-23
	NOSIP	CD8.3	0.781	0.44	0.959639	9.76789e-49	2.23275e-44
	NELL2	CD8.3	0.48	0.151	0.957492	1.69862e-64	3.88271e-60
	ACTN1	CD8.3	0.373	0.071	0.923694	1.77151e-46	4.04932e-42
	PRKCQ-AS1	CD8.3	0.551	0.243	0.869325	1.97905e-43	4.5237e-39
	GAS5	CD8.3	0.729	0.457	0.838372	4.23738e-47	9.68581e-43
	TCF7	CD8.3	0.713	0.4	0.814464	1.76658e-51	4.03805e-47
	RGS10	CD8.3	0.691	0.388	0.800058	1.20077e-47	2.74473e-43
	RPS13	CD8.3	0.999	0.986	0.782117	1.00124e-160	2.28862e-156
	EEF1B2	CD8.3	0.983	0.909	0.78016	3.98694e-105	9.11335e-101
	RPS5	CD8.3	0.991	0.949	0.779763	4.98306e-131	1.13903e-126
	SELL	CD8.3	0.748	0.369	0.779375	2.8315e-62	6.47224e-58
	EEF1G	CD8.3	0.839	0.694	0.748891	5.37292e-50	1.22814e-45
	LDHB	CD8.3	0.929	0.699	0.722046	8.3491e-60	1.90844e-55
	CD8B	CD8.3	0.787	0.492	0.717611	1.5518e-39	3.5471e-35
	RPL22	CD8.3	0.993	0.944	0.717298	2.6173e-92	5.98262e-88
	PIK3IP1	CD8.3	0.552	0.288	0.710906	7.17149e-31	1.63926e-26
	RPL32	CD8.3	0.999	0.994	0.693917	1.03451e-150	2.36469e-146
	MAL	CD8.3	0.512	0.219	0.678294	7.12725e-33	1.62915e-28
	RPS8	CD8.3	0.999	0.991	0.666569	5.4005e-136	1.23445e-131
	RPS12	CD8.3	1	0.999	0.656022	1.41252e-145	3.22875e-141
	ARMH1	CD8.3	0.314	0.106	0.65582	6.27238e-38	1.43374e-33
	SNHG8	CD8.3	0.71	0.476	0.644606	2.68297e-35	6.13272e-31
	TRABD2A	CD8.3	0.346	0.126	0.639912	1.92455e-43	4.39914e-39
	MYC	CD8.3	0.427	0.199	0.633147	6.38576e-23	1.45966e-18
	OXNAD1	CD8.3	0.477	0.234	0.628185	7.3665e-28	1.68384e-23
	NPM1	CD8.3	0.95	0.833	0.627169	1.57736e-60	3.60553e-56
	RPL5	CD8.3	0.991	0.961	0.607488	3.99656e-95	9.13533e-91
	RCAN3	CD8.3	0.442	0.213	0.605727	6.20269e-31	1.41781e-26
	RPS3A	CD8.3	0.999	0.997	0.602916	4.28939e-110	9.80469e-106
	RPL12	CD8.3	0.994	0.975	0.598903	9.69356e-111	2.21575e-106
	PASK	CD8.3	0.314	0.12	0.596732	1.69032e-26	3.86372e-22
	ABLIM1	CD8.3	0.446	0.222	0.595693	3.09354e-31	7.07122e-27
	LDLRAP1	CD8.3	0.394	0.176	0.5942	2.02552e-27	4.62993e-23
	SPINT2	CD8.3	0.307	0.097	0.590194	8.38145e-33	1.91583e-28
	RPS23	CD8.3	0.999	0.993	0.58867	1.56414e-131	3.57532e-127
	RPLP1	CD8.3	0.999	0.996	0.581682	4.22775e-87	9.6638e-83
	RPS28	CD8.3	0.999	0.994	0.578976	1.61073e-96	3.68181e-92
	NDFIP1	CD8.3	0.641	0.424	0.576813	4.1128e-25	9.40103e-21
	RPL13	CD8.3	1	0.994	0.566225	9.41707e-125	2.15255e-120
	SATB1	CD8.3	0.355	0.165	0.564925	7.10322e-22	1.62365e-17
	RPL10A	CD8.3	0.984	0.939	0.556657	1.7708e-66	4.04768e-62
	RPL18	CD8.3	0.994	0.973	0.555288	1.29164e-98	2.95243e-94
	LEPROTL1	CD8.3	0.726	0.489	0.550654	5.20635e-23	1.19007e-18
	BACH2	CD8.3	0.228	0.06	0.550423	1.4072e-28	3.21657e-24
	EIF3E	CD8.3	0.828	0.609	0.55036	1.82424e-32	4.16984e-28
	RPL11	CD8.3	0.999	0.99	0.550345	1.79476e-95	4.10245e-91
	RPL9	CD8.3	0.996	0.979	0.549272	6.21064e-80	1.41963e-75
	RPS6	CD8.3	0.998	0.987	0.543419	2.49205e-93	5.69632e-89
	RPS21	CD8.3	0.997	0.983	0.538589	2.26509e-78	5.17755e-74
	FOXP1	CD8.3	0.607	0.38	0.538043	7.94074e-21	1.8151e-16
	PDE3B	CD8.3	0.386	0.191	0.537121	4.62875e-22	1.05804e-17
	RPL19	CD8.3	0.997	0.988	0.533987	1.43249e-104	3.27439e-100
	SARAF	CD8.3	0.956	0.845	0.525157	5.26755e-49	1.20406e-44
	TGFBR2	CD8.3	0.437	0.241	0.523898	8.35254e-13	1.90922e-08
	RPL36A	CD8.3	0.96	0.888	0.520058	1.0561e-43	2.41403e-39
	RPL30	CD8.3	1	0.996	0.518104	2.32734e-107	5.31983e-103
	SERINC5	CD8.3	0.283	0.116	0.518104	7.92117e-19	1.81062e-14
	LRRN3	CD8.3	0.148	0.016	0.517902	1.09908e-31	2.51228e-27
	RPL35A	CD8.3	0.998	0.984	0.513796	1.17161e-94	2.67808e-90
	RPL37	CD8.3	0.999	0.987	0.513244	3.80912e-85	8.70689e-81
	RPLP0	CD8.3	0.987	0.952	0.511684	4.9482e-58	1.13106e-53
	CD55	CD8.3	0.406	0.216	0.510253	1.13143e-19	2.58621e-15
	SH3YL1	CD8.3	0.288	0.12	0.508762	2.54142e-26	5.80918e-22
	CAMK4	CD8.3	0.5	0.288	0.500008	1.36164e-14	3.11243e-10
	CLEC11A	CD8.3	0.168	0.017	0.499209	9.73878e-31	2.22609e-26
	RPS25	CD8.3	0.995	0.975	0.49817	6.14663e-76	1.405e-71
	SNHG5	CD8.3	0.49	0.31	0.497093	1.33587e-13	3.05354e-09
	RPL34	CD8.3	1	0.999	0.491973	1.32679e-77	3.03277e-73
	NUCB2	CD8.3	0.478	0.277	0.488836	1.30911e-17	2.99237e-13
	NACA	CD8.3	0.985	0.951	0.488127	1.8426e-60	4.21181e-56
	RPS14	CD8.3	0.999	0.993	0.484377	9.52768e-101	2.17784e-96
	ALKBH7	CD8.3	0.499	0.305	0.477104	7.20591e-20	1.64713e-15
	ST13	CD8.3	0.639	0.434	0.474286	1.32124e-22	3.02009e-18
	RPS16	CD8.3	0.982	0.939	0.471098	1.28648e-50	2.94064e-46
	HSPB1	CD8.3	0.511	0.324	0.469062	8.93656e-18	2.04272e-13
	RPL36	CD8.3	0.991	0.967	0.464756	5.21454e-65	1.19194e-60
	FLT3LG	CD8.3	0.583	0.387	0.463113	5.57073e-23	1.27336e-18
	RPS4X	CD8.3	0.995	0.984	0.46309	8.47848e-61	1.93801e-56
	RPL10	CD8.3	1	0.998	0.462069	6.47332e-96	1.47967e-91
	RPS9	CD8.3	0.977	0.944	0.458917	1.93032e-58	4.41232e-54
	RPL18A	CD8.3	0.997	0.982	0.458588	4.06819e-69	9.29907e-65
	RPLP2	CD8.3	0.996	0.975	0.455993	2.9606e-62	6.76735e-58
	CD7	CD8.3	0.778	0.593	0.455045	5.34503e-18	1.22177e-13
	RACK1	CD8.3	0.974	0.935	0.454632	1.91954e-67	4.38769e-63
	CD27	CD8.3	0.564	0.341	0.454028	1.45376e-16	3.323e-12
	EEF1A1	CD8.3	1	1	0.450966	1.57576e-101	3.60188e-97
	PCED1B	CD8.3	0.334	0.17	0.450722	1.24535e-21	2.84661e-17
	TXK	CD8.3	0.265	0.11	0.448519	9.54937e-15	2.18279e-10
	PCED1B-AS1	CD8.3	0.74	0.598	0.445781	4.77025e-13	1.09038e-08
	EIF3H	CD8.3	0.766	0.581	0.445449	1.4212e-19	3.24858e-15
	MAML2	CD8.3	0.287	0.139	0.443669	3.43568e-18	7.85327e-14
	RPL4	CD8.3	0.956	0.879	0.441004	1.06718e-38	2.43936e-34
	CD248	CD8.3	0.138	0.006	0.438305	1.63223e-28	3.73095e-24
	RPL8	CD8.3	0.988	0.952	0.436104	6.4023e-51	1.46344e-46
	TPT1	CD8.3	0.999	0.994	0.435775	8.39674e-58	1.91933e-53
	RPL39	CD8.3	1	0.999	0.434188	3.80825e-52	8.7049e-48
	RPL38	CD8.3	0.965	0.893	0.425728	3.42306e-28	7.82443e-24
	A1BG	CD8.3	0.26	0.117	0.424175	1.05082e-17	2.40197e-13
	C12orf57	CD8.3	0.853	0.707	0.419956	2.2498e-19	5.14258e-15
	SNX9	CD8.3	0.207	0.082	0.419174	6.96461e-12	1.59197e-07
	RPS18	CD8.3	1	0.993	0.416426	1.78278e-67	4.07508e-63
	RPL17	CD8.3	0.938	0.862	0.412203	6.25258e-27	1.42921e-22
	PPA1	CD8.3	0.457	0.287	0.409569	2.97694e-11	6.80469e-07
	RPL24	CD8.3	0.98	0.941	0.408766	2.18799e-41	5.0013e-37
	RPL29	CD8.3	0.992	0.97	0.408298	8.97797e-67	2.05219e-62
	RPL28	CD8.3	0.998	0.993	0.408023	8.14275e-66	1.86127e-61
	ZFAS1	CD8.3	0.731	0.551	0.40787	4.81646e-14	1.10095e-09
	PABPC1	CD8.3	0.913	0.835	0.405324	2.34104e-27	5.35114e-23
	RPL14	CD8.3	0.992	0.978	0.399453	7.45414e-64	1.70387e-59
	NT5E	CD8.3	0.144	0.021	0.399425	7.48879e-24	1.71179e-19
	RPSA	CD8.3	0.989	0.962	0.396884	5.87113e-34	1.34202e-29
	PRMT2	CD8.3	0.626	0.446	0.391806	9.89313e-08	0.00226137
	RPS15A	CD8.3	1	0.998	0.391736	1.87382e-77	4.28318e-73
	BEX3	CD8.3	0.213	0.088	0.390933	4.56638e-13	1.04378e-08
	RPS15	CD8.3	0.994	0.981	0.385341	3.31857e-69	7.58558e-65
	RPL7	CD8.3	0.96	0.868	0.383822	2.54668e-21	5.82121e-17
	RPS2	CD8.3	0.989	0.968	0.382825	2.10525e-42	4.81218e-38
	CHRM3-AS2	CD8.3	0.182	0.068	0.380021	6.36271e-15	1.45439e-10
	GYPC	CD8.3	0.688	0.522	0.378697	5.55342e-13	1.2694e-08
	EPHX2	CD8.3	0.193	0.074	0.378502	1.31934e-14	3.01575e-10
	ATP5PO	CD8.3	0.624	0.471	0.376018	2.87598e-09	6.57391e-05
	RSL1D1	CD8.3	0.561	0.393	0.375995	1.2599e-15	2.87988e-11
	RIC3	CD8.3	0.194	0.079	0.374967	5.09676e-15	1.16502e-10
	RPS27A	CD8.3	1	0.998	0.373316	3.30593e-66	7.55669e-62
	COX4I1	CD8.3	0.937	0.861	0.372025	1.0358e-19	2.36763e-15
	CARS	CD8.3	0.199	0.085	0.370644	1.88452e-16	4.30763e-12
	RPL21	CD8.3	0.999	0.993	0.36834	7.06252e-38	1.61435e-33
	SNHG32	CD8.3	0.269	0.142	0.367535	1.12011e-09	2.56035e-05
	LTB	CD8.3	0.875	0.553	0.365191	3.55517e-29	8.1264e-25
	PCSK1N	CD8.3	0.162	0.055	0.36154	9.9649e-19	2.27778e-14
	MGAT4A	CD8.3	0.562	0.394	0.36153	1.93252e-14	4.41736e-10
	TMIGD2	CD8.3	0.196	0.064	0.358975	4.50677e-20	1.03016e-15
	SNHG7	CD8.3	0.379	0.237	0.358752	4.82435e-10	1.10275e-05
	TMEM123	CD8.3	0.561	0.397	0.357451	2.10964e-11	4.82222e-07
	EIF3L	CD8.3	0.717	0.555	0.355335	1.34702e-12	3.07901e-08
	NOP53	CD8.3	0.808	0.674	0.353268	6.81137e-21	1.55694e-16
	RPL31	CD8.3	0.941	0.864	0.352497	5.67898e-18	1.2981e-13
	SEPTIN6	CD8.3	0.532	0.386	0.352409	3.27121e-14	7.47733e-10
	PDK1	CD8.3	0.167	0.058	0.346509	2.26405e-11	5.17516e-07
	SNHG6	CD8.3	0.65	0.496	0.345696	4.61836e-16	1.05567e-11
	BTF3	CD8.3	0.953	0.892	0.344425	1.37145e-22	3.13487e-18
	NFKBIZ	CD8.3	0.293	0.174	0.341306	6.98136e-08	0.0015958
	AC243960.1	CD8.3	0.382	0.239	0.341106	1.06445e-14	2.43312e-10
	CHCHD10	CD8.3	0.431	0.285	0.340213	3.40706e-14	7.78785e-10
	FBL	CD8.3	0.486	0.336	0.338056	8.50689e-09	0.00019445
	IMPDH2	CD8.3	0.312	0.183	0.337231	3.68288e-10	8.41832e-06
	PRDX6	CD8.3	0.495	0.348	0.335887	5.54191e-11	1.26677e-06
	RPS3	CD8.3	0.999	0.993	0.334281	1.14519e-55	2.61767e-51
	CCDC18-AS1	CD8.3	0.319	0.196	0.332654	7.08374e-08	0.0016192
	PIM2	CD8.3	0.371	0.228	0.331896	4.58336e-09	0.000104766
	NSA2	CD8.3	0.628	0.469	0.328844	2.19278e-15	5.01225e-11
	UXT	CD8.3	0.69	0.538	0.328692	1.36385e-20	3.11748e-16
	COX7C	CD8.3	0.935	0.845	0.326879	2.72744e-17	6.23437e-13
	ANP32B	CD8.3	0.678	0.527	0.326152	2.08846e-10	4.77379e-06
	LINC01550	CD8.3	0.201	0.096	0.324943	2.18015e-17	4.9834e-13
	RPL15	CD8.3	0.983	0.959	0.322426	4.31295e-34	9.85854e-30
	RPL37A	CD8.3	0.974	0.939	0.320108	4.58427e-20	1.04787e-15
	SCGB3A1	CD8.3	0.103	0.024	0.317515	1.22327e-12	2.79615e-08
	RPL7A	CD8.3	0.986	0.97	0.315469	3.41532e-40	7.80673e-36
	EIF2S3	CD8.3	0.492	0.344	0.314788	1.19121e-06	0.0272286
	UQCRB	CD8.3	0.898	0.795	0.313984	5.55048e-17	1.26873e-12
	IL6ST	CD8.3	0.233	0.13	0.309764	6.07474e-07	0.0138856
	ITM2C	CD8.3	0.164	0.061	0.307427	1.42257e-12	3.25172e-08
	EEF2	CD8.3	0.912	0.833	0.300945	1.18567e-14	2.71021e-10
	RPL3	CD8.3	0.991	0.972	0.300781	7.68891e-32	1.75753e-27
	RPL6	CD8.3	0.994	0.979	0.300702	2.28607e-21	5.22551e-17
	DGKA	CD8.3	0.329	0.209	0.298062	1.90442e-11	4.35312e-07
	PRKAR1B	CD8.3	0.137	0.045	0.297033	1.8195e-09	4.15902e-05
	RPS17	CD8.3	0.662	0.531	0.29661	1.03939e-10	2.37583e-06
	TMEM243	CD8.3	0.373	0.254	0.293437	1.71147e-08	0.000391207
	SMDT1	CD8.3	0.611	0.467	0.292303	1.22341e-09	2.79648e-05
	FAU	CD8.3	0.99	0.973	0.29108	6.9929e-38	1.59844e-33
	NCF1	CD8.3	0.215	0.115	0.291065	6.87808e-10	1.57219e-05
	TCEA3	CD8.3	0.143	0.056	0.28962	4.66717e-10	1.06682e-05
	APBA2	CD8.3	0.172	0.07	0.286859	2.20642e-13	5.04344e-09
	ATP6V0E2	CD8.3	0.292	0.18	0.286737	2.63377e-10	6.02028e-06
	SELENOH	CD8.3	0.563	0.425	0.284474	1.60266e-09	3.66337e-05
	RPL26	CD8.3	0.992	0.976	0.281644	3.15094e-34	7.20243e-30
	RPS24	CD8.3	0.998	0.992	0.280729	4.19665e-27	9.5927e-23
	FAM153CP	CD8.3	0.118	0.034	0.280574	1.36194e-12	3.11313e-08
	EPB41L4A-AS1	CD8.3	0.3	0.187	0.279965	1.50747e-09	3.44577e-05
	RHOH	CD8.3	0.498	0.361	0.278746	4.80957e-07	0.0109937
	NAA16	CD8.3	0.208	0.108	0.27777	2.99792e-13	6.85265e-09
	LEF1-AS1	CD8.3	0.117	0.031	0.275372	2.60513e-15	5.95482e-11
	APEX1	CD8.3	0.375	0.256	0.273559	1.06563e-12	2.43582e-08
	SERP1	CD8.3	0.695	0.556	0.272759	2.32059e-07	0.00530441
	CITED4	CD8.3	0.165	0.079	0.27019	2.96394e-14	6.77497e-10
	LSM5	CD8.3	0.374	0.252	0.269508	1.50626e-09	3.44301e-05
	ATF7IP2	CD8.3	0.266	0.166	0.268677	6.12965e-09	0.000140111
	COMMD6	CD8.3	0.889	0.789	0.267475	1.57589e-12	3.60216e-08
	RPL41	CD8.3	1	1	0.267232	8.78711e-51	2.00856e-46
	C1QBP	CD8.3	0.472	0.346	0.259774	7.31029e-07	0.0167099
	RPL27	CD8.3	0.959	0.914	0.259201	1.4369e-16	3.28447e-12
	CHMP7	CD8.3	0.191	0.104	0.258531	3.73866e-09	8.54582e-05
	APBB1	CD8.3	0.192	0.102	0.256048	1.60055e-06	0.0365853
	RPS29	CD8.3	0.989	0.969	0.255322	1.91442e-10	4.37599e-06
	ZNF101	CD8.3	0.18	0.095	0.253484	1.18138e-08	0.000270039
	HSP90AB1	CD8.3	0.838	0.726	0.252662	1.34188e-09	3.06727e-05
	THEM4	CD8.3	0.292	0.191	0.25097	5.08294e-08	0.00116186
	RPS27	CD8.3	1	1	0.25001	1.30063e-27	2.97298e-23
	GZMK	CD8.4	0.922	0.232	2.38485	6.87399e-223	1.57126e-218
	DUSP2	CD8.4	0.823	0.422	1.65617	3.51694e-109	8.03901e-105
	CMC1	CD8.4	0.662	0.317	1.12441	7.59401e-49	1.73584e-44
	CD74	CD8.4	0.876	0.7	1.06527	5.98951e-64	1.36908e-59
	LYAR	CD8.4	0.586	0.324	0.852382	4.45937e-39	1.01932e-34
	JUN	CD8.4	0.66	0.542	0.78367	3.55327e-19	8.12206e-15
	CXCR4	CD8.4	0.751	0.594	0.766075	1.14092e-37	2.60791e-33
	CCL5	CD8.4	0.965	0.575	0.765818	6.1672e-58	1.4097e-53
	CLDND1	CD8.4	0.394	0.257	0.731279	6.68749e-16	1.52863e-11
	PIK3R1	CD8.4	0.542	0.417	0.686576	2.58729e-13	5.91404e-09
	SH2D1A	CD8.4	0.348	0.189	0.660045	2.96644e-21	6.78068e-17
	ZFP36L2	CD8.4	0.896	0.835	0.634516	1.71901e-37	3.92932e-33
	MS4A1	CD8.4	0.129	0.013	0.611221	2.67215e-24	6.10801e-20
	RGS1	CD8.4	0.15	0.051	0.599994	1.45215e-09	3.31931e-05
	ZFP36	CD8.4	0.713	0.62	0.59815	8.61009e-17	1.96809e-12
	TENT5C	CD8.4	0.268	0.138	0.592383	2.37736e-10	5.43418e-06
	CST7	CD8.4	0.861	0.516	0.58936	5.67414e-39	1.297e-34
	NR4A2	CD8.4	0.295	0.18	0.588374	9.56553e-09	0.000218649
	DNAJB1	CD8.4	0.592	0.486	0.587253	3.31855e-16	7.58554e-12
	CCL4	CD8.4	0.419	0.257	0.583447	2.03037e-15	4.64102e-11
	CD69	CD8.4	0.612	0.498	0.579951	1.07643e-14	2.46051e-10
	DUSP1	CD8.4	0.688	0.582	0.56153	2.08455e-17	4.76487e-13
	HERPUD1	CD8.4	0.404	0.302	0.532172	1.07565e-13	2.45872e-09
	GZMM	CD8.4	0.678	0.538	0.525266	4.44082e-18	1.01508e-13
	FYN	CD8.4	0.57	0.444	0.525056	8.19118e-17	1.87234e-12
	IFNG-AS1	CD8.4	0.129	0.022	0.513414	4.9871e-21	1.13995e-16
	LYST	CD8.4	0.246	0.136	0.50585	2.94999e-13	6.74308e-09
	FCRL3	CD8.4	0.164	0.057	0.489861	2.46833e-15	5.64212e-11
	JUNB	CD8.4	0.811	0.759	0.484255	1.39959e-16	3.19919e-12
	EOMES	CD8.4	0.212	0.1	0.475124	3.10914e-19	7.10687e-15
	MT-ND2	CD8.4	0.934	0.91	0.459138	5.90179e-22	1.34903e-17
	GZMA	CD8.4	0.831	0.498	0.457514	4.67325e-34	1.06821e-29
	CD81	CD8.4	0.472	0.386	0.451711	6.00414e-09	0.000137243
	CXCR3	CD8.4	0.206	0.107	0.445706	3.75902e-12	8.59237e-08
	HLA-DPA1	CD8.4	0.498	0.348	0.445085	2.11707e-12	4.83919e-08
	IGLV2-14	CD8.4	0.157	0.072	0.442383	1.10904e-09	2.53505e-05
	SRSF7	CD8.4	0.649	0.595	0.439994	2.24497e-12	5.13156e-08
	CD27	CD8.4	0.446	0.355	0.434691	5.72862e-10	1.30945e-05
	BTG1	CD8.4	0.923	0.908	0.429944	2.3183e-26	5.29917e-22
	MT-ND1	CD8.4	0.933	0.914	0.427401	3.05064e-21	6.97316e-17
	PHACTR2	CD8.4	0.207	0.128	0.414358	1.55709e-07	0.00355919
	NFKBIA	CD8.4	0.609	0.559	0.408123	3.51954e-09	8.04496e-05
	CYTOR	CD8.4	0.286	0.192	0.386377	2.18496e-07	0.00499439
	CLEC2B	CD8.4	0.527	0.446	0.377914	2.88822e-08	0.00066019
	ZBTB38	CD8.4	0.315	0.241	0.359914	1.81472e-09	4.14808e-05
	CD8A	CD8.4	0.7	0.514	0.352198	2.80689e-14	6.41599e-10
	MTRNR2L12	CD8.4	0.945	0.934	0.35145	3.17597e-10	7.25963e-06
	XCL2	CD8.4	0.165	0.079	0.345872	1.59622e-07	0.00364863
	CD8B	CD8.4	0.68	0.507	0.342076	8.7483e-09	0.000199969
	HCST	CD8.4	0.855	0.813	0.321289	2.94681e-15	6.73581e-11
	H3F3B	CD8.4	0.942	0.944	0.318285	7.14857e-14	1.63402e-09
	MT-ND3	CD8.4	0.993	0.991	0.315182	2.38404e-13	5.44943e-09
	ENC1	CD8.4	0.113	0.047	0.314131	6.42798e-10	1.46931e-05
	EML4	CD8.4	0.402	0.358	0.313726	1.92141e-06	0.0439196
	EIF1	CD8.4	0.955	0.959	0.305221	5.87071e-23	1.34193e-18
	SRGN	CD8.4	0.747	0.653	0.302902	4.99927e-14	1.14273e-09
	GUK1	CD8.4	0.631	0.585	0.300085	1.74831e-06	0.0399629
	SAMD3	CD8.4	0.352	0.271	0.29727	2.62045e-07	0.00598982
	HLA-DRB1	CD8.4	0.356	0.248	0.297133	2.88067e-07	0.00658463
	RPS29	CD8.4	0.978	0.97	0.29241	8.05655e-16	1.84157e-11
	MT-CO3	CD8.4	0.992	0.991	0.291587	1.82492e-15	4.1714e-11
	TXNIP	CD8.4	0.93	0.934	0.281223	1.12578e-07	0.00257331
	TSC22D3	CD8.4	0.756	0.738	0.2806	2.5981e-08	0.000593873
	SBDS	CD8.4	0.365	0.334	0.267032	4.10295e-07	0.00937853
	MT-CYB	CD8.4	0.992	0.989	0.26139	3.19908e-11	7.31245e-07
	PTPRC	CD8.4	0.909	0.895	0.25927	1.7504e-06	0.0400107
	IL7R	CD8.4	0.714	0.62	0.258057	1.07203e-06	0.0245044
	IL32	CD8.4	0.93	0.897	0.254283	8.85915e-14	2.02502e-09
	FOS	CD8.5	0.715	0.479	0.971376	2.53453e-37	5.79344e-33
	IL7R	CD8.5	0.93	0.601	0.907493	7.00654e-62	1.60156e-57
	JUN	CD8.5	0.719	0.537	0.906084	7.21637e-32	1.64952e-27
	GZMK	CD8.5	0.599	0.261	0.88629	5.1187e-41	1.17003e-36
	JUNB	CD8.5	0.873	0.754	0.867792	1.29266e-36	2.95476e-32
	NELL2	CD8.5	0.421	0.162	0.836901	2.74748e-31	6.2802e-27
	FXYD2	CD8.5	0.182	0.017	0.722256	1.72164e-33	3.93533e-29
	TNFAIP3	CD8.5	0.644	0.422	0.709686	5.83146e-25	1.33296e-20
	ZFP36L2	CD8.5	0.93	0.832	0.695705	7.09092e-34	1.62084e-29
	LYAR	CD8.5	0.585	0.324	0.678449	6.0106e-29	1.3739e-24
	DUSP1	CD8.5	0.757	0.576	0.560075	1.1079e-20	2.53245e-16
	RGCC	CD8.5	0.274	0.155	0.512431	1.49357e-08	0.0003414
	COTL1	CD8.5	0.625	0.403	0.499899	1.99617e-16	4.56285e-12
	DUSP2	CD8.5	0.658	0.437	0.497999	2.43221e-20	5.55954e-16
	CXCR3	CD8.5	0.265	0.102	0.491887	1.03327e-13	2.36184e-09
	NFKBIA	CD8.5	0.713	0.55	0.488609	2.28371e-16	5.22009e-12
	LTB	CD8.5	0.847	0.561	0.481417	4.95438e-18	1.13247e-13
	CLDND1	CD8.5	0.41	0.255	0.465214	1.29433e-11	2.95858e-07
	NR4A2	CD8.5	0.328	0.177	0.464161	1.72108e-18	3.93404e-14
	CXCR4	CD8.5	0.754	0.594	0.462135	5.33511e-14	1.2195e-09
	ARHGAP15	CD8.5	0.583	0.41	0.452347	7.08383e-14	1.61922e-09
	ITM2C	CD8.5	0.188	0.061	0.445554	1.56035e-26	3.56666e-22
	LEPROTL1	CD8.5	0.651	0.5	0.443548	2.03767e-12	4.65771e-08
	IFNG-AS1	CD8.5	0.128	0.022	0.438805	1.23395e-18	2.82057e-14
	TSC22D3	CD8.5	0.846	0.73	0.438094	2.02821e-15	4.63608e-11
	DNAJB1	CD8.5	0.623	0.483	0.437791	9.03051e-08	0.00206419
	GADD45B	CD8.5	0.496	0.402	0.421381	2.45483e-11	5.61125e-07
	FOSB	CD8.5	0.262	0.157	0.408192	4.40126e-09	0.000100604
	MT-ND2	CD8.5	0.96	0.907	0.3964	1.70618e-22	3.89998e-18
	NSG1	CD8.5	0.175	0.067	0.383047	1.64297e-10	3.75549e-06
	ZNF331	CD8.5	0.184	0.091	0.35672	1.83111e-07	0.00418554
	CD69	CD8.5	0.63	0.497	0.356474	6.18606e-09	0.000141401
	LINC02446	CD8.5	0.274	0.15	0.35435	1.46075e-11	3.33899e-07
	CD27	CD8.5	0.496	0.351	0.349459	9.20469e-08	0.00210401
	MT-ND1	CD8.5	0.951	0.913	0.349043	1.58174e-17	3.61554e-13
	FTH1	CD8.5	0.947	0.913	0.342853	1.06673e-11	2.43834e-07
	PAG1	CD8.5	0.263	0.16	0.334286	5.51287e-09	0.000126013
	RCAN3	CD8.5	0.352	0.225	0.320455	4.74082e-09	0.000108366
	SARAF	CD8.5	0.922	0.85	0.320128	1.77679e-12	4.06138e-08
	LGALS3	CD8.5	0.152	0.068	0.301103	3.06581e-08	0.000700782
	BTG1	CD8.5	0.951	0.906	0.296953	8.77136e-11	2.00496e-06
	TNFSF8	CD8.5	0.192	0.1	0.294905	9.03191e-08	0.00206451
	UBXN11	CD8.5	0.172	0.091	0.293284	8.69409e-09	0.00019873
	LSR	CD8.5	0.182	0.09	0.287636	3.99625e-08	0.000913462
	TCF7	CD8.5	0.58	0.417	0.286121	5.23653e-09	0.000119697
	PCSK1N	CD8.5	0.131	0.06	0.276615	1.45167e-06	0.0331822
	MGAT4A	CD8.5	0.511	0.402	0.2747	6.52681e-07	0.014919
	PABPC1	CD8.5	0.902	0.837	0.265675	1.21506e-11	2.77739e-07
	ITGA4	CD8.5	0.537	0.423	0.257617	2.06659e-07	0.00472382
	KLF6	CD8.5	0.68	0.581	0.251505	9.92454e-09	0.000226855
	MT-ND4L	CD8.5	0.97	0.955	0.251108	3.88215e-10	8.87382e-06
	TYROBP	CD8.6	0.61	0.063	2.50599	4.44322e-148	1.01563e-143
	KLRC2	CD8.6	0.49	0.044	2.19792	7.93956e-110	1.81482e-105
	FCER1G	CD8.6	0.304	0.032	1.99872	3.76809e-64	8.61309e-60
	GNLY	CD8.6	0.919	0.37	1.94079	1.6802e-149	3.8406e-145
	KLRF1	CD8.6	0.58	0.099	1.6874	7.77025e-104	1.77612e-99
	TRDC	CD8.6	0.258	0.011	1.65677	7.73515e-58	1.7681e-53
	HOPX	CD8.6	0.714	0.245	1.54064	7.16345e-102	1.63742e-97
	FCGR3A	CD8.6	0.567	0.122	1.49075	5.92348e-85	1.35399e-80
	XCL2	CD8.6	0.358	0.065	1.41483	3.92817e-57	8.979e-53
	GZMB	CD8.6	0.74	0.243	1.39412	6.16498e-99	1.40919e-94
	KLRD1	CD8.6	0.798	0.285	1.34491	1.93586e-106	4.42499e-102
	PRF1	CD8.6	0.804	0.353	1.32833	1.67371e-101	3.82576e-97
	NKG7	CD8.6	0.993	0.555	1.30686	5.28047e-142	1.20701e-137
	CLIC3	CD8.6	0.379	0.112	1.30418	2.63665e-52	6.02686e-48
	KLRC1	CD8.6	0.181	0.03	1.25978	1.26266e-35	2.88619e-31
	CTSW	CD8.6	0.879	0.574	1.21605	4.04359e-102	9.24283e-98
	CST7	CD8.6	0.909	0.515	1.18868	2.77403e-98	6.34088e-94
	CMC1	CD8.6	0.752	0.313	1.17474	1.07819e-79	2.46453e-75
	IFITM2	CD8.6	0.88	0.701	1.11162	1.20907e-72	2.76369e-68
	IL2RB	CD8.6	0.422	0.152	1.10721	6.192e-48	1.41537e-43
	KLRB1	CD8.6	0.579	0.276	1.10037	1.56224e-41	3.57096e-37
	XCL1	CD8.6	0.21	0.046	1.07663	2.82766e-37	6.46346e-33
	KLRC3	CD8.6	0.258	0.018	1.04639	5.35467e-59	1.22397e-54
	PLAC8	CD8.6	0.525	0.26	1.04278	4.26952e-45	9.75927e-41
	CCL4	CD8.6	0.565	0.247	1.04265	4.11865e-45	9.41441e-41
	SH2D1B	CD8.6	0.171	0.006	1.02904	1.28009e-39	2.92604e-35
	EFHD2	CD8.6	0.662	0.336	1.00529	2.34695e-54	5.36466e-50
	CD160	CD8.6	0.26	0.044	0.959534	5.17263e-33	1.18236e-28
	FGFBP2	CD8.6	0.612	0.245	0.953005	1.24481e-54	2.8454e-50
	SRGN	CD8.6	0.881	0.644	0.919506	1.07476e-59	2.45668e-55
	CD63	CD8.6	0.558	0.288	0.919469	1.8456e-46	4.21867e-42
	FGR	CD8.6	0.367	0.095	0.918946	3.75753e-47	8.58896e-43
	GZMA	CD8.6	0.904	0.495	0.914141	3.56121e-75	8.14021e-71
	PTGDR	CD8.6	0.396	0.128	0.906033	1.62462e-44	3.71355e-40
	AOAH	CD8.6	0.451	0.159	0.892121	5.59363e-47	1.27859e-42
	GZMH	CD8.6	0.722	0.338	0.887344	1.12673e-47	2.57547e-43
	RHOC	CD8.6	0.428	0.17	0.884173	2.40854e-36	5.50544e-32
	S1PR5	CD8.6	0.388	0.12	0.8757	4.70047e-36	1.07443e-31
	MATK	CD8.6	0.504	0.231	0.861816	1.16662e-34	2.66666e-30
	CCL5	CD8.6	0.901	0.584	0.861019	3.60065e-63	8.23038e-59
	TTC38	CD8.6	0.335	0.086	0.860936	2.81354e-38	6.43118e-34
	SPON2	CD8.6	0.38	0.158	0.850574	8.05099e-35	1.84029e-30
	CD7	CD8.6	0.747	0.6	0.844432	1.09208e-22	2.49628e-18
	APMAP	CD8.6	0.55	0.276	0.837936	4.92767e-45	1.12637e-40
	TRGV2	CD8.6	0.188	0.064	0.830883	3.18653e-25	7.28376e-21
	ZEB2	CD8.6	0.462	0.178	0.819524	9.1593e-48	2.09363e-43
	IFITM3	CD8.6	0.429	0.259	0.812368	6.21807e-24	1.42133e-19
	PLEK	CD8.6	0.59	0.265	0.812055	5.23523e-53	1.19667e-48
	CCL3	CD8.6	0.168	0.028	0.802404	5.73181e-27	1.31018e-22
	ITGB2	CD8.6	0.819	0.638	0.782886	6.5307e-55	1.49279e-50
	CEP78	CD8.6	0.316	0.11	0.780047	2.58685e-35	5.91302e-31
	TBX21	CD8.6	0.395	0.149	0.777585	1.71547e-37	3.92121e-33
	CX3CR1	CD8.6	0.382	0.131	0.770766	2.0724e-35	4.73709e-31
	CXXC5	CD8.6	0.204	0.038	0.770377	1.77925e-33	4.067e-29
	CYBA	CD8.6	0.901	0.791	0.767415	1.03302e-68	2.36127e-64
	ADGRG1	CD8.6	0.395	0.135	0.760208	6.55038e-30	1.49729e-25
	CD247	CD8.6	0.598	0.426	0.753813	5.93181e-26	1.35589e-21
	CD300A	CD8.6	0.292	0.094	0.753208	2.16385e-26	4.94614e-22
	TIGIT	CD8.6	0.336	0.13	0.747295	3.61202e-16	8.25635e-12
	TRGV8	CD8.6	0.178	0.038	0.740955	4.22992e-33	9.66875e-29
	KLRK1	CD8.6	0.555	0.339	0.733572	1.86644e-27	4.26631e-23
	ABHD17A	CD8.6	0.541	0.38	0.723493	8.5504e-23	1.95445e-18
	IKZF2	CD8.6	0.216	0.04	0.717397	5.50307e-31	1.25789e-26
	TPST2	CD8.6	0.486	0.252	0.715191	1.00291e-28	2.29244e-24
	MAP3K8	CD8.6	0.284	0.118	0.704051	7.25362e-22	1.65803e-17
	FCRL6	CD8.6	0.39	0.15	0.683407	9.61887e-40	2.19868e-35
	SH2D2A	CD8.6	0.397	0.208	0.682217	6.13045e-19	1.4013e-14
	NCR1	CD8.6	0.179	0.019	0.681103	1.65285e-30	3.77807e-26
	KIR2DL3	CD8.6	0.144	0.014	0.657111	2.24513e-27	5.13192e-23
	C1orf21	CD8.6	0.321	0.117	0.642779	7.82705e-26	1.78911e-21
	GSTP1	CD8.6	0.619	0.447	0.637801	2.1371e-20	4.88498e-16
	PYHIN1	CD8.6	0.411	0.213	0.63385	8.18931e-20	1.87191e-15
	SAMD3	CD8.6	0.48	0.261	0.63223	4.50617e-26	1.03002e-21
	HCST	CD8.6	0.911	0.809	0.62321	1.84183e-34	4.21005e-30
	RASSF1	CD8.6	0.43	0.239	0.622981	7.00126e-23	1.60035e-18
	TRGC1	CD8.6	0.161	0.038	0.621196	1.30028e-21	2.97218e-17
	PTPN12	CD8.6	0.203	0.066	0.620948	1.72466e-17	3.94224e-13
	ARPC5L	CD8.6	0.508	0.325	0.620882	1.27677e-16	2.91843e-12
	LITAF	CD8.6	0.764	0.598	0.618877	4.38369e-28	1.00202e-23
	GZMM	CD8.6	0.714	0.536	0.615483	2.85311e-30	6.52164e-26
	TRGV4	CD8.6	0.149	0.044	0.60988	4.87155e-16	1.11354e-11
	CTSC	CD8.6	0.586	0.365	0.601254	2.5577e-28	5.84638e-24
	JAK1	CD8.6	0.751	0.637	0.598358	1.36197e-20	3.11318e-16
	CLIC1	CD8.6	0.791	0.614	0.598219	3.60032e-31	8.2296e-27
	NCR3	CD8.6	0.273	0.12	0.593196	2.66933e-19	6.10156e-15
	CCL4L2	CD8.6	0.181	0.056	0.592992	1.16818e-15	2.67023e-11
	TRGV9	CD8.6	0.122	0.035	0.586811	3.05564e-13	6.98458e-09
	MBP	CD8.6	0.568	0.411	0.584735	2.72833e-17	6.23641e-13
	SLC9A3R1	CD8.6	0.634	0.478	0.56531	2.11579e-21	4.83628e-17
	LYST	CD8.6	0.275	0.135	0.565019	9.88204e-14	2.25884e-09
	MAPK1	CD8.6	0.327	0.179	0.564028	6.10314e-13	1.39506e-08
	FCRL3	CD8.6	0.194	0.056	0.562105	1.33864e-22	3.05986e-18
	ARHGAP9	CD8.6	0.419	0.286	0.561913	4.39676e-14	1.00501e-09
	ID2	CD8.6	0.466	0.326	0.561826	6.93881e-08	0.00158607
	GPR65	CD8.6	0.347	0.21	0.559356	5.76338e-15	1.31739e-10
	KLRG1	CD8.6	0.551	0.337	0.554823	3.74439e-23	8.55893e-19
	RAP1B	CD8.6	0.734	0.586	0.550186	1.07094e-18	2.44796e-14
	MCTP2	CD8.6	0.21	0.079	0.549942	1.1709e-17	2.67644e-13
	CTSD	CD8.6	0.422	0.292	0.545054	1.87043e-18	4.27544e-14
	GNG2	CD8.6	0.486	0.321	0.544965	1.22677e-22	2.80416e-18
	FAM49B	CD8.6	0.482	0.332	0.541057	2.38394e-26	5.44921e-22
	C12orf75	CD8.6	0.56	0.341	0.534895	1.03669e-25	2.36967e-21
	PFN1	CD8.6	0.975	0.944	0.53422	1.43903e-52	3.28934e-48
	LAT2	CD8.6	0.105	0.007	0.527865	8.84927e-20	2.02277e-15
	LYN	CD8.6	0.136	0.023	0.52745	3.74179e-20	8.55298e-16
	TGFBR3	CD8.6	0.341	0.175	0.523253	1.96783e-20	4.49807e-16
	SYNE1	CD8.6	0.457	0.287	0.522364	2.61579e-14	5.97917e-10
	ITGAM	CD8.6	0.179	0.054	0.522298	3.27838e-13	7.49372e-09
	PRSS23	CD8.6	0.277	0.111	0.519314	2.36259e-22	5.40041e-18
	IFITM1	CD8.6	0.961	0.906	0.511949	5.05062e-33	1.15447e-28
	OSTF1	CD8.6	0.455	0.327	0.511693	2.77113e-14	6.33424e-10
	DOK2	CD8.6	0.42	0.274	0.506025	1.93113e-16	4.41417e-12
	MYO1F	CD8.6	0.369	0.218	0.502212	1.35701e-10	3.10186e-06
	APOBEC3G	CD8.6	0.391	0.235	0.501377	2.15333e-12	4.92208e-08
	CHST12	CD8.6	0.316	0.175	0.499867	1.08236e-09	2.47407e-05
	SYTL3	CD8.6	0.333	0.193	0.498939	1.51759e-14	3.46892e-10
	SPN	CD8.6	0.425	0.283	0.498412	3.18977e-14	7.29118e-10
	DHRS7	CD8.6	0.535	0.396	0.493451	6.52078e-17	1.49052e-12
	ARPC2	CD8.6	0.866	0.774	0.491327	1.50616e-31	3.44278e-27
	KIR3DL2	CD8.6	0.103	0.012	0.48683	2.52485e-15	5.77131e-11
	ABI3	CD8.6	0.272	0.131	0.485246	1.98427e-16	4.53564e-12
	GNPTAB	CD8.6	0.253	0.134	0.482956	4.42131e-16	1.01062e-11
	ARL4C	CD8.6	0.715	0.585	0.482906	6.41119e-16	1.46547e-11
	G6PD	CD8.6	0.26	0.137	0.482695	1.22693e-14	2.80451e-10
	HSH2D	CD8.6	0.141	0.051	0.481473	1.22839e-07	0.00280786
	CD244	CD8.6	0.177	0.058	0.473141	8.97581e-17	2.05169e-12
	METRNL	CD8.6	0.165	0.049	0.471318	2.90065e-15	6.63031e-11
	PTPN6	CD8.6	0.386	0.289	0.46879	9.59564e-08	0.00219337
	RUNX3	CD8.6	0.342	0.214	0.468687	8.81736e-08	0.00201547
	LPCAT1	CD8.6	0.22	0.093	0.466964	5.11075e-14	1.16822e-09
	PAXX	CD8.6	0.59	0.465	0.465778	7.04465e-14	1.61027e-09
	IQGAP1	CD8.6	0.451	0.324	0.46213	5.97792e-10	1.36643e-05
	MAPRE2	CD8.6	0.349	0.239	0.461564	5.41363e-10	1.23745e-05
	STARD3NL	CD8.6	0.193	0.094	0.459619	4.60362e-12	1.05229e-07
	UBE2F	CD8.6	0.259	0.15	0.459276	7.71461e-07	0.0176341
	IRF1	CD8.6	0.497	0.384	0.451807	8.23026e-08	0.00188127
	UBB	CD8.6	0.79	0.701	0.451643	6.33368e-18	1.44775e-13
	HMGN3	CD8.6	0.491	0.377	0.449781	9.97015e-11	2.27898e-06
	CDK2AP2	CD8.6	0.362	0.24	0.448747	4.75022e-10	1.08581e-05
	TLN1	CD8.6	0.472	0.354	0.4485	4.59941e-11	1.05133e-06
	ADAM8	CD8.6	0.252	0.142	0.445818	1.02971e-11	2.35372e-07
	GK5	CD8.6	0.166	0.068	0.441412	1.25299e-12	2.86409e-08
	PPP1R18	CD8.6	0.496	0.37	0.439883	5.49401e-10	1.25582e-05
	SASH3	CD8.6	0.343	0.223	0.43906	4.71092e-09	0.000107682
	SLAMF7	CD8.6	0.216	0.093	0.439027	2.55858e-12	5.84841e-08
	ADGRE5	CD8.6	0.438	0.321	0.438476	7.68119e-14	1.75577e-09
	PIK3AP1	CD8.6	0.132	0.031	0.435902	6.49978e-15	1.48572e-10
	EOMES	CD8.6	0.225	0.1	0.435362	9.33649e-18	2.13413e-13
	LAIR2	CD8.6	0.183	0.076	0.434676	4.57099e-07	0.0104484
	DBI	CD8.6	0.548	0.434	0.432754	8.12555e-12	1.85734e-07
	TGFB1	CD8.6	0.622	0.52	0.432717	2.59532e-14	5.93239e-10
	SKAP2	CD8.6	0.159	0.064	0.428455	1.77779e-09	4.06368e-05
	ACTN4	CD8.6	0.303	0.186	0.428194	8.16402e-13	1.86613e-08
	VAV3	CD8.6	0.176	0.068	0.428156	4.51966e-14	1.0331e-09
	MT2A	CD8.6	0.583	0.466	0.426473	2.86602e-10	6.55114e-06
	BIN2	CD8.6	0.607	0.51	0.424793	1.8287e-09	4.18005e-05
	CD81	CD8.6	0.47	0.387	0.423069	1.47503e-08	0.000337162
	NDUFB7	CD8.6	0.487	0.383	0.422122	1.0188e-15	2.32877e-11
	OSBPL5	CD8.6	0.13	0.032	0.419989	8.23162e-19	1.88158e-14
	CD53	CD8.6	0.598	0.493	0.419768	6.5234e-14	1.49112e-09
	LSP1	CD8.6	0.775	0.705	0.418623	1.38171e-17	3.15831e-13
	PPP1CA	CD8.6	0.654	0.551	0.416108	1.99347e-12	4.55667e-08
	CD99	CD8.6	0.802	0.709	0.415969	5.62724e-19	1.28628e-14
	STOM	CD8.6	0.293	0.169	0.413616	1.5177e-18	3.46916e-14
	BZW1	CD8.6	0.496	0.39	0.413593	1.53344e-07	0.00350514
	IGF2R	CD8.6	0.244	0.144	0.40919	5.82102e-10	1.33057e-05
	PTPRE	CD8.6	0.21	0.109	0.405032	7.59761e-14	1.73666e-09
	MSN	CD8.6	0.57	0.466	0.404281	2.81603e-10	6.43689e-06
	JAZF1	CD8.6	0.185	0.081	0.404209	1.70756e-09	3.90314e-05
	RAB5IF	CD8.6	0.337	0.239	0.403865	2.74404e-07	0.00627232
	KLRC4	CD8.6	0.273	0.156	0.402132	1.1013e-09	2.51734e-05
	TFDP2	CD8.6	0.22	0.127	0.399519	6.02717e-07	0.0137769
	FHL3	CD8.6	0.121	0.038	0.398145	1.28839e-10	2.94501e-06
	CFL1	CD8.6	0.943	0.904	0.395253	1.76186e-28	4.02726e-24
	PTPN4	CD8.6	0.341	0.24	0.394409	1.9971e-06	0.0456497
	PSMB10	CD8.6	0.524	0.431	0.394112	3.60791e-08	0.000824697
	PRELID1	CD8.6	0.489	0.395	0.392527	1.09948e-06	0.0251319
	AGTRAP	CD8.6	0.261	0.157	0.391437	4.63198e-09	0.000105878
	CD164	CD8.6	0.42	0.325	0.389919	9.227e-09	0.000210911
	HLA-A	CD8.6	0.983	0.966	0.387951	3.98092e-35	9.09959e-31
	GSAP	CD8.6	0.127	0.049	0.386725	4.04843e-07	0.00925391
	ZFP36	CD8.6	0.69	0.622	0.384616	9.84303e-08	0.00224992
	TSEN54	CD8.6	0.317	0.212	0.37997	6.38327e-13	1.45909e-08
	USP28	CD8.6	0.171	0.072	0.379844	5.07788e-13	1.1607e-08
	PRKACB	CD8.6	0.353	0.257	0.377735	1.78898e-08	0.000408926
	PTPN22	CD8.6	0.274	0.165	0.377513	2.58593e-08	0.000591091
	HLA-DPB1	CD8.6	0.551	0.388	0.37734	1.48271e-08	0.000338919
	CEBPD	CD8.6	0.105	0.049	0.376623	1.84868e-06	0.0422571
	TPI1	CD8.6	0.598	0.518	0.375144	2.0205e-09	4.61846e-05
	PSMB9	CD8.6	0.686	0.592	0.373744	1.0074e-08	0.000230271
	ADRB2	CD8.6	0.207	0.099	0.373663	4.0181e-11	9.18457e-07
	LAIR1	CD8.6	0.186	0.101	0.372326	3.88135e-12	8.872e-08
	UTRN	CD8.6	0.365	0.272	0.372306	4.62583e-08	0.00105737
	ZAP70	CD8.6	0.494	0.416	0.372279	1.71498e-07	0.0039201
	RAC2	CD8.6	0.833	0.774	0.371705	1.84628e-17	4.22024e-13
	SLC15A4	CD8.6	0.162	0.07	0.370108	1.02567e-07	0.00234448
	RAB29	CD8.6	0.295	0.193	0.369682	6.06988e-07	0.0138745
	NDUFB2	CD8.6	0.572	0.502	0.368438	8.29181e-08	0.00189534
	PDIA3	CD8.6	0.619	0.533	0.367949	6.61139e-12	1.51123e-07
	BHLHE40	CD8.6	0.249	0.16	0.367873	1.09117e-07	0.0024942
	F2R	CD8.6	0.194	0.087	0.367529	6.46592e-08	0.00147798
	XBP1	CD8.6	0.453	0.394	0.365635	2.39521e-07	0.00547498
	CAST	CD8.6	0.508	0.417	0.365	3.8558e-10	8.81359e-06
	LCP1	CD8.6	0.727	0.633	0.364881	1.36661e-07	0.00312381
	C5orf56	CD8.6	0.254	0.169	0.364602	9.35764e-10	2.13897e-05
	SIPA1	CD8.6	0.272	0.182	0.364388	8.53115e-11	1.95005e-06
	ANXA6	CD8.6	0.572	0.495	0.363027	9.07528e-10	2.07443e-05
	TXK	CD8.6	0.157	0.123	0.362938	1.98641e-06	0.0454053
	TOX	CD8.6	0.163	0.072	0.361832	1.15044e-06	0.0262968
	PLAAT3	CD8.6	0.179	0.085	0.360245	2.14266e-08	0.000489769
	CISD3	CD8.6	0.265	0.171	0.359784	6.49357e-11	1.4843e-06
	HLA-C	CD8.6	0.989	0.978	0.358856	5.46452e-27	1.24908e-22
	NCALD	CD8.6	0.139	0.06	0.358822	2.39262e-18	5.46906e-14
	ARF6	CD8.6	0.527	0.436	0.358669	2.26762e-08	0.000518332
	ATP2B4	CD8.6	0.276	0.174	0.357995	2.33288e-10	5.33249e-06
	VASP	CD8.6	0.294	0.209	0.3565	1.15063e-08	0.000263011
	PLEKHF1	CD8.6	0.184	0.095	0.348609	4.98531e-11	1.13954e-06
	HLA-DPA1	CD8.6	0.514	0.348	0.344918	1.72335e-12	3.93923e-08
	BST2	CD8.6	0.401	0.331	0.343965	2.19783e-07	0.0050238
	MYL6	CD8.6	0.886	0.841	0.343135	5.53291e-17	1.26471e-12
	SRSF9	CD8.6	0.461	0.381	0.341176	2.21258e-09	5.05751e-05
	BSG	CD8.6	0.458	0.377	0.340818	3.16038e-08	0.000722401
	FLNA	CD8.6	0.574	0.479	0.340503	2.59163e-09	5.92394e-05
	MTSS1	CD8.6	0.159	0.076	0.339144	1.28542e-12	2.9382e-08
	SERPINB6	CD8.6	0.218	0.136	0.336098	4.8096e-08	0.00109938
	FUT11	CD8.6	0.153	0.069	0.33474	5.23378e-12	1.19634e-07
	H3F3A	CD8.6	0.896	0.852	0.334321	1.26142e-19	2.88335e-15
	PDLIM1	CD8.6	0.107	0.029	0.332934	1.79314e-09	4.09875e-05
	HLA-B	CD8.6	0.996	0.986	0.332323	2.6986e-35	6.16846e-31
	CD74	CD8.6	0.792	0.708	0.330662	2.79835e-11	6.39648e-07
	ARHGAP25	CD8.6	0.278	0.188	0.329952	8.52578e-09	0.000194882
	GNG5	CD8.6	0.495	0.414	0.325671	7.96942e-07	0.0182165
	H3F3B	CD8.6	0.972	0.941	0.32447	1.57964e-12	3.61073e-08
	CLEC2B	CD8.6	0.551	0.445	0.324405	1.71031e-08	0.000390943
	ITCH	CD8.6	0.205	0.127	0.323994	3.79474e-07	0.00867401
	TRGC2	CD8.6	0.15	0.063	0.319765	1.04863e-10	2.39697e-06
	RHOA	CD8.6	0.799	0.74	0.319553	2.09357e-09	4.78549e-05
	SUN2	CD8.6	0.533	0.478	0.31948	5.63234e-11	1.28744e-06
	RAC1	CD8.6	0.458	0.383	0.318464	6.24048e-08	0.00142645
	MYO1G	CD8.6	0.39	0.302	0.317625	3.84304e-07	0.00878442
	CALM1	CD8.6	0.925	0.894	0.317424	3.76301e-15	8.60148e-11
	GUK1	CD8.6	0.653	0.584	0.316437	3.06731e-10	7.01126e-06
	ACTB	CD8.6	0.995	0.988	0.316217	6.913e-26	1.58017e-21
	CAPNS1	CD8.6	0.342	0.275	0.315381	7.37437e-11	1.68563e-06
	MACF1	CD8.6	0.377	0.299	0.315083	1.0946e-06	0.0250204
	LGR6	CD8.6	0.113	0.032	0.314244	3.05503e-13	6.98319e-09
	UBE2E3	CD8.6	0.27	0.185	0.313705	3.22122e-08	0.000736306
	SYTL2	CD8.6	0.179	0.104	0.313082	7.53758e-08	0.00172294
	VAMP8	CD8.6	0.497	0.431	0.311922	1.60201e-06	0.0366187
	TNFRSF1B	CD8.6	0.267	0.181	0.311768	1.96754e-06	0.0449739
	RNF213	CD8.6	0.549	0.47	0.311149	1.40017e-06	0.0320051
	BTN3A2	CD8.6	0.356	0.278	0.308961	3.97099e-07	0.0090769
	POLR2L	CD8.6	0.535	0.49	0.3086	1.47477e-08	0.000337103
	SSBP4	CD8.6	0.391	0.311	0.308277	2.08485e-07	0.00476556
	MVD	CD8.6	0.139	0.074	0.308196	7.22264e-07	0.0165095
	ASCL2	CD8.6	0.159	0.071	0.304543	2.63079e-09	6.01346e-05
	MXRA7	CD8.6	0.174	0.09	0.303892	3.45413e-11	7.89546e-07
	LNPEP	CD8.6	0.335	0.268	0.303633	2.28982e-07	0.00523408
	RPS6KA1	CD8.6	0.236	0.163	0.302103	1.81229e-06	0.0414253
	PXN	CD8.6	0.275	0.202	0.300903	3.40534e-07	0.00778392
	RGS3	CD8.6	0.131	0.057	0.30082	8.60034e-08	0.00196587
	MYL12A	CD8.6	0.957	0.936	0.30077	1.0995e-17	2.51323e-13
	IFI16	CD8.6	0.301	0.233	0.3004	3.70655e-08	0.000847244
	AC090152.1	CD8.6	0.115	0.047	0.299645	3.15234e-07	0.00720563
	ZNF600	CD8.6	0.135	0.063	0.297544	3.87773e-08	0.000886372
	PPP2R2B	CD8.6	0.16	0.082	0.296721	1.30309e-08	0.00029786
	PYCARD	CD8.6	0.267	0.192	0.294431	4.3503e-08	0.000994391
	LMAN2	CD8.6	0.381	0.319	0.293602	8.03966e-07	0.018377
	RAB1B	CD8.6	0.304	0.234	0.292647	1.50559e-07	0.00344148
	POLR2G	CD8.6	0.287	0.222	0.29254	7.23178e-07	0.0165304
	CD320	CD8.6	0.234	0.164	0.291293	1.65145e-06	0.0377489
	MPST	CD8.6	0.115	0.051	0.290271	1.60694e-11	3.67314e-07
	YWHAZ	CD8.6	0.822	0.768	0.289306	2.35836e-09	5.39075e-05
	CYB561D2	CD8.6	0.224	0.153	0.287729	4.28528e-08	0.000979529
	LPGAT1	CD8.6	0.159	0.108	0.286005	9.12307e-07	0.0208535
	DTHD1	CD8.6	0.109	0.038	0.285033	3.04237e-10	6.95424e-06
	REL	CD8.6	0.269	0.201	0.284752	6.16488e-08	0.00140917
	TPM3	CD8.6	0.757	0.711	0.28327	2.68937e-09	6.14737e-05
	IFNGR1	CD8.6	0.177	0.122	0.282922	1.51068e-08	0.00034531
	RALY	CD8.6	0.441	0.383	0.281931	7.63274e-07	0.0174469
	SERF2	CD8.6	0.91	0.89	0.281847	6.28577e-15	1.4368e-10
	RBM39	CD8.6	0.62	0.568	0.281808	4.30043e-08	0.000982992
	CMTM6	CD8.6	0.256	0.196	0.280902	1.62521e-06	0.037149
	PTPRC	CD8.6	0.921	0.894	0.280114	2.0142e-10	4.60407e-06
	MFSD10	CD8.6	0.325	0.256	0.277986	6.9684e-09	0.000159284
	SYNGR1	CD8.6	0.122	0.05	0.277348	7.11228e-10	1.62573e-05
	C11orf21	CD8.6	0.135	0.074	0.277252	6.58444e-10	1.50507e-05
	ANXA4	CD8.6	0.146	0.076	0.276952	1.11235e-06	0.0254261
	ANXA2	CD8.6	0.448	0.345	0.275339	2.17085e-09	4.96212e-05
	CDC42	CD8.6	0.663	0.605	0.274823	1.21078e-06	0.0276761
	HLA-E	CD8.6	0.93	0.906	0.273104	3.05482e-12	6.9827e-08
	MYL12B	CD8.6	0.819	0.773	0.271845	5.15286e-13	1.17784e-08
	PPP2R5C	CD8.6	0.508	0.427	0.2699	6.91116e-07	0.0157975
	CAP1	CD8.6	0.58	0.511	0.269672	1.48367e-06	0.0339137
	MT-CO1	CD8.6	0.999	0.998	0.267296	6.21471e-10	1.42056e-05
	HLA-DRB1	CD8.6	0.39	0.246	0.266591	1.80327e-09	4.12192e-05
	HLA-DQA2	CD8.6	0.109	0.041	0.265862	2.30618e-07	0.00527147
	PTMS	CD8.6	0.164	0.085	0.263577	2.91583e-10	6.66501e-06
	DDX5	CD8.6	0.896	0.877	0.261277	6.85246e-11	1.56633e-06
	PSAP	CD8.6	0.406	0.356	0.258314	1.06319e-06	0.0243024
	B2M	CD8.6	1	1	0.255835	4.21403e-43	9.63244e-39
	CCND3	CD8.6	0.621	0.593	0.254591	2.26408e-07	0.00517523
	TMED9	CD8.6	0.321	0.268	0.251173	8.98662e-07	0.0205416
	ARPC5	CD8.6	0.533	0.473	0.250914	9.79847e-08	0.00223974
	HLA-DRA	CD8.7	0.653	0.074	2.12414	1.13713e-155	2.59926e-151
	CD74	CD8.7	0.973	0.705	2.06144	9.82439e-205	2.24566e-200
	HLA-DRB1	CD8.7	0.833	0.237	1.84613	1.68611e-161	3.85412e-157
	GZMK	CD8.7	0.843	0.269	1.63797	1.06991e-123	2.44561e-119
	HLA-DRB5	CD8.7	0.544	0.111	1.48768	2.24428e-96	5.12997e-92
	HLA-DPA1	CD8.7	0.811	0.345	1.38132	1.64198e-125	3.75324e-121
	DUSP2	CD8.7	0.814	0.442	1.22559	1.42211e-66	3.25066e-62
	HLA-DQB1	CD8.7	0.433	0.073	1.19495	8.54162e-78	1.95244e-73
	HLA-DQA1	CD8.7	0.364	0.044	1.18493	8.91821e-70	2.03852e-65
	CCL5	CD8.7	0.983	0.594	1.17046	7.92058e-116	1.81049e-111
	COTL1	CD8.7	0.742	0.41	1.16913	1.09532e-75	2.50368e-71
	HLA-DPB1	CD8.7	0.814	0.386	1.12442	4.18234e-101	9.55999e-97
	HLA-DMA	CD8.7	0.361	0.081	0.902288	2.85883e-51	6.53472e-47
	GZMA	CD8.7	0.926	0.511	0.847529	2.13239e-68	4.87422e-64
	PMAIP1	CD8.7	0.262	0.077	0.702814	7.17143e-30	1.63925e-25
	FABP5	CD8.7	0.269	0.062	0.698648	1.65098e-37	3.77381e-33
	LYAR	CD8.7	0.639	0.335	0.69328	6.86657e-37	1.56956e-32
	SH2D1A	CD8.7	0.451	0.193	0.688041	2.55572e-34	5.84186e-30
	CST7	CD8.7	0.918	0.531	0.638904	8.33958e-53	1.90626e-48
	CD81	CD8.7	0.578	0.386	0.638009	3.19435e-19	7.30164e-15
	CXCR3	CD8.7	0.314	0.108	0.635238	5.77043e-32	1.31901e-27
	IFNG	CD8.7	0.186	0.038	0.622072	1.10629e-22	2.52875e-18
	LIME1	CD8.7	0.702	0.559	0.596982	4.83106e-23	1.10428e-18
	CMC1	CD8.7	0.636	0.334	0.596244	6.42254e-33	1.46806e-28
	ANXA5	CD8.7	0.466	0.263	0.595238	4.48458e-18	1.02509e-13
	RGS1	CD8.7	0.213	0.054	0.594356	2.3971e-20	5.47929e-16
	CLDND1	CD8.7	0.438	0.262	0.590258	3.59595e-14	8.21962e-10
	CNN2	CD8.7	0.707	0.532	0.590197	6.39489e-22	1.46175e-17
	GZMM	CD8.7	0.757	0.542	0.581077	6.85416e-30	1.56672e-25
	CYTOR	CD8.7	0.418	0.192	0.573072	5.82967e-26	1.33255e-21
	TNFAIP3	CD8.7	0.63	0.433	0.569135	1.15817e-18	2.64734e-14
	CCL4	CD8.7	0.524	0.262	0.55713	2.69513e-29	6.16053e-25
	HLA-DQA2	CD8.7	0.171	0.042	0.554607	2.01709e-25	4.61066e-21
	IRF1	CD8.7	0.563	0.386	0.547131	9.76139e-16	2.23126e-11
	IDH2	CD8.7	0.428	0.219	0.544185	2.10237e-26	4.80561e-22
	PFN1	CD8.7	0.985	0.945	0.539568	8.12104e-68	1.85631e-63
	CLIC1	CD8.7	0.813	0.621	0.53666	8.74458e-30	1.99884e-25
	MT2A	CD8.7	0.683	0.467	0.534499	3.92079e-26	8.96215e-22
	CD27	CD8.7	0.496	0.358	0.531681	8.64264e-12	1.97554e-07
	CD8B	CD8.7	0.784	0.512	0.527408	1.05307e-21	2.40711e-17
	LYST	CD8.7	0.333	0.139	0.525349	8.8761e-16	2.0289e-11
	GBP5	CD8.7	0.408	0.228	0.508799	3.09105e-15	7.06552e-11
	APOBEC3G	CD8.7	0.452	0.239	0.505764	3.08019e-22	7.04069e-18
	PLAAT4	CD8.7	0.648	0.532	0.504982	1.33782e-14	3.058e-10
	CD8A	CD8.7	0.794	0.52	0.497154	1.68212e-24	3.845e-20
	GAPDH	CD8.7	0.927	0.857	0.49288	2.36894e-35	5.41492e-31
	PSMB9	CD8.7	0.758	0.593	0.489573	3.24799e-28	7.42424e-24
	ITM2A	CD8.7	0.491	0.328	0.487887	9.06853e-16	2.07289e-11
	NKG7	CD8.7	0.968	0.574	0.484369	3.22637e-42	7.37484e-38
	KLRK1	CD8.7	0.563	0.347	0.479657	2.31726e-15	5.2968e-11
	FYN	CD8.7	0.652	0.448	0.474561	2.44705e-17	5.59346e-13
	IL32	CD8.7	0.968	0.897	0.471399	1.68677e-42	3.85562e-38
	SAT1	CD8.7	0.518	0.363	0.4692	4.7104e-10	1.0767e-05
	DUSP4	CD8.7	0.124	0.022	0.466155	2.89916e-13	6.6269e-09
	PSME2	CD8.7	0.659	0.498	0.459838	5.51637e-22	1.26093e-17
	CDCA7	CD8.7	0.143	0.016	0.457574	1.03313e-30	2.36154e-26
	JPT1	CD8.7	0.377	0.2	0.455114	8.09564e-17	1.8505e-12
	CD2	CD8.7	0.72	0.55	0.452778	2.55113e-25	5.83136e-21
	HERPUD1	CD8.7	0.481	0.305	0.452467	4.68506e-17	1.07091e-12
	TIGIT	CD8.7	0.309	0.14	0.450689	2.04997e-20	4.68581e-16
	KLRG1	CD8.7	0.557	0.346	0.449985	2.16654e-16	4.95228e-12
	PPP2R5C	CD8.7	0.632	0.426	0.444614	3.54413e-27	8.10116e-23
	STK17A	CD8.7	0.627	0.452	0.441365	1.95324e-21	4.46471e-17
	SAMD3	CD8.7	0.491	0.27	0.44073	3.62725e-19	8.29116e-15
	CD99	CD8.7	0.87	0.71	0.439472	5.71999e-29	1.30748e-24
	ARPC1B	CD8.7	0.74	0.615	0.43595	4.42914e-17	1.01241e-12
	PPP1CA	CD8.7	0.721	0.553	0.431978	1.40417e-26	3.20965e-22
	MT1E	CD8.7	0.216	0.082	0.428082	5.08661e-18	1.1627e-13
	CORO1A	CD8.7	0.888	0.807	0.427414	6.14324e-27	1.40422e-22
	TENT5C	CD8.7	0.292	0.144	0.42694	2.47015e-19	5.64627e-15
	YBX3	CD8.7	0.228	0.091	0.426835	1.7644e-14	4.03307e-10
	SUB1	CD8.7	0.808	0.661	0.423999	4.41108e-24	1.00829e-19
	STAT1	CD8.7	0.321	0.201	0.420836	4.67582e-12	1.0688e-07
	PSME1	CD8.7	0.859	0.756	0.414719	2.04114e-21	4.66565e-17
	SRGN	CD8.7	0.855	0.654	0.414445	5.83328e-19	1.33337e-14
	CLEC2B	CD8.7	0.646	0.446	0.413966	1.14324e-18	2.61321e-14
	SH3BGRL3	CD8.7	0.974	0.919	0.413091	6.8686e-42	1.57002e-37
	JUN	CD8.7	0.673	0.547	0.412294	1.97281e-08	0.000450944
	UBE2L6	CD8.7	0.437	0.284	0.411303	6.3726e-12	1.45665e-07
	SLF1	CD8.7	0.222	0.084	0.410806	3.13484e-18	7.16563e-14
	PIK3R1	CD8.7	0.585	0.421	0.407167	1.02039e-07	0.0023324
	MIR4435-2HG	CD8.7	0.218	0.079	0.404997	6.75027e-17	1.54298e-12
	LAG3	CD8.7	0.253	0.109	0.403786	2.29218e-12	5.23946e-08
	MAP3K8	CD8.7	0.276	0.125	0.40188	5.61822e-13	1.28421e-08
	CHI3L2	CD8.7	0.137	0.031	0.40121	1.89833e-15	4.3392e-11
	EZR	CD8.7	0.552	0.403	0.398142	1.58476e-09	3.62245e-05
	C12orf75	CD8.7	0.595	0.348	0.397867	2.37005e-25	5.41746e-21
	ANXA2	CD8.7	0.524	0.346	0.396559	2.36222e-11	5.39957e-07
	SYNE1	CD8.7	0.482	0.293	0.393708	4.06108e-13	9.28283e-09
	OPTN	CD8.7	0.468	0.301	0.386548	1.34268e-15	3.06911e-11
	GNAS	CD8.7	0.651	0.538	0.386088	6.52841e-09	0.000149226
	ITGA4	CD8.7	0.604	0.426	0.385683	1.37871e-17	3.15146e-13
	HLA-A	CD8.7	0.99	0.967	0.382694	8.87409e-38	2.02844e-33
	ENC1	CD8.7	0.174	0.049	0.382514	5.18658e-21	1.18555e-16
	WIPF1	CD8.7	0.596	0.422	0.382466	1.10392e-14	2.52335e-10
	HLA-DMB	CD8.7	0.119	0.017	0.379176	4.29764e-19	9.82354e-15
	MYL6	CD8.7	0.925	0.842	0.377134	3.31727e-34	7.58262e-30
	PECAM1	CD8.7	0.233	0.102	0.375541	8.94389e-11	2.04439e-06
	CTSC	CD8.7	0.583	0.374	0.374874	8.56334e-19	1.95741e-14
	TAP1	CD8.7	0.459	0.304	0.374857	5.61412e-14	1.28327e-09
	CD69	CD8.7	0.674	0.502	0.373579	1.17865e-13	2.69417e-09
	PLEK	CD8.7	0.519	0.28	0.372323	1.02133e-19	2.33456e-15
	RNF213	CD8.7	0.628	0.471	0.371496	1.04781e-12	2.39508e-08
	FLNA	CD8.7	0.646	0.48	0.368096	1.96806e-14	4.49859e-10
	LSP1	CD8.7	0.817	0.706	0.367635	3.35177e-19	7.66149e-15
	HCST	CD8.7	0.918	0.813	0.36034	1.28732e-27	2.94255e-23
	CD160	CD8.7	0.16	0.056	0.357957	6.29425e-15	1.43874e-10
	NIN	CD8.7	0.331	0.19	0.357172	3.51352e-09	8.03121e-05
	UBC	CD8.7	0.919	0.854	0.353051	6.71623e-20	1.5352e-15
	ITGB2	CD8.7	0.798	0.646	0.349911	3.45497e-22	7.89737e-18
	PSMB8	CD8.7	0.607	0.47	0.349758	3.05907e-15	6.99241e-11
	CD3D	CD8.7	0.866	0.765	0.348257	5.38582e-21	1.23109e-16
	GUK1	CD8.7	0.729	0.584	0.348144	7.44481e-12	1.70173e-07
	SLC9A3R1	CD8.7	0.653	0.483	0.347487	2.1251e-14	4.85756e-10
	MAP4K1	CD8.7	0.314	0.174	0.34582	1.48594e-17	3.39656e-13
	PYCARD	CD8.7	0.332	0.193	0.345657	2.73386e-09	6.24906e-05
	IGLV2-14	CD8.7	0.184	0.075	0.343923	1.42506e-10	3.2574e-06
	ARL6IP1	CD8.7	0.542	0.409	0.343292	2.67396e-11	6.11213e-07
	CBLB	CD8.7	0.37	0.222	0.3423	2.37364e-09	5.42567e-05
	MXD4	CD8.7	0.25	0.128	0.340243	2.05344e-11	4.69376e-07
	TXN	CD8.7	0.489	0.326	0.33836	7.28406e-19	1.66499e-14
	NR4A2	CD8.7	0.308	0.185	0.335933	4.65384e-09	0.000106378
	ISG20	CD8.7	0.583	0.469	0.334453	1.31977e-10	3.01673e-06
	PPP1R18	CD8.7	0.534	0.374	0.333059	1.39533e-11	3.18944e-07
	MRPL10	CD8.7	0.291	0.159	0.332853	4.3058e-12	9.8422e-08
	LCK	CD8.7	0.751	0.636	0.331614	1.04542e-16	2.38961e-12
	ATG2A	CD8.7	0.202	0.086	0.330947	1.5249e-07	0.00348561
	TERF2IP	CD8.7	0.53	0.389	0.330857	1.70642e-06	0.0390053
	CRTAM	CD8.7	0.16	0.06	0.327562	3.8642e-11	8.83278e-07
	LIMD2	CD8.7	0.781	0.707	0.327465	2.13597e-09	4.8824e-05
	ISG15	CD8.7	0.311	0.186	0.325638	1.57871e-12	3.6086e-08
	FAM160B1	CD8.7	0.209	0.095	0.324946	1.04868e-07	0.00239706
	UBE2S	CD8.7	0.246	0.126	0.324375	1.11694e-12	2.55311e-08
	PSMB10	CD8.7	0.57	0.433	0.324056	9.07937e-10	2.07536e-05
	LCP1	CD8.7	0.785	0.635	0.324018	2.18302e-16	4.98996e-12
	ODC1	CD8.7	0.358	0.236	0.32124	1.80612e-08	0.000412842
	RNF167	CD8.7	0.477	0.323	0.321112	1.34439e-11	3.07301e-07
	HSPB11	CD8.7	0.303	0.174	0.31966	4.56253e-08	0.0010429
	SSBP4	CD8.7	0.454	0.312	0.31957	5.65643e-07	0.0129295
	ARPC3	CD8.7	0.826	0.728	0.319006	2.06927e-14	4.72993e-10
	DBI	CD8.7	0.594	0.437	0.318778	9.37853e-13	2.14374e-08
	CTSW	CD8.7	0.792	0.589	0.3176	3.73849e-17	8.54544e-13
	CYBA	CD8.7	0.907	0.795	0.316293	2.33225e-22	5.33106e-18
	REL	CD8.7	0.332	0.201	0.315162	1.04103e-06	0.023796
	MYO1F	CD8.7	0.379	0.224	0.314958	1.1309e-12	2.58502e-08
	EOMES	CD8.7	0.235	0.104	0.314875	3.28243e-13	7.50299e-09
	MSC	CD8.7	0.128	0.036	0.314482	1.47093e-16	3.36226e-12
	PTPRC	CD8.7	0.95	0.894	0.314415	2.60393e-21	5.95206e-17
	XCL2	CD8.7	0.19	0.083	0.313978	6.34854e-14	1.45115e-09
	CAPZB	CD8.7	0.71	0.594	0.313788	9.45249e-13	2.16065e-08
	ATP5F1E	CD8.7	0.946	0.903	0.312812	1.3443e-19	3.07281e-15
	ACTB	CD8.7	0.998	0.989	0.311936	9.97888e-32	2.28097e-27
	LITAF	CD8.7	0.763	0.604	0.309031	1.35846e-12	3.10517e-08
	DRAP1	CD8.7	0.581	0.442	0.308885	6.34543e-11	1.45044e-06
	SMS	CD8.7	0.246	0.135	0.306403	1.86713e-08	0.000426789
	ARAP2	CD8.7	0.326	0.185	0.304872	5.80292e-13	1.32643e-08
	PRKCH	CD8.7	0.476	0.337	0.3037	4.98127e-09	0.000113862
	ATP5F1B	CD8.7	0.63	0.508	0.303503	2.12296e-11	4.85267e-07
	MT1F	CD8.7	0.226	0.122	0.300952	2.94842e-09	6.7395e-05
	CCDC167	CD8.7	0.26	0.153	0.300596	1.22527e-08	0.000280073
	CD84	CD8.7	0.214	0.109	0.299773	5.896e-10	1.34771e-05
	TOX	CD8.7	0.188	0.075	0.298821	1.46119e-15	3.34e-11
	LINC01871	CD8.7	0.3	0.173	0.29604	4.44383e-10	1.01577e-05
	MYO1G	CD8.7	0.447	0.304	0.295708	6.21898e-11	1.42154e-06
	TESC	CD8.7	0.156	0.052	0.294788	5.65932e-14	1.29361e-09
	CFL1	CD8.7	0.955	0.905	0.294531	2.62751e-19	6.00597e-15
	MSN	CD8.7	0.614	0.469	0.294291	2.33745e-14	5.34295e-10
	EMP3	CD8.7	0.848	0.742	0.293726	2.94228e-11	6.72546e-07
	PSMB3	CD8.7	0.475	0.345	0.293272	2.25196e-10	5.14753e-06
	PIM3	CD8.7	0.264	0.166	0.293218	1.44106e-10	3.29397e-06
	TTN	CD8.7	0.136	0.057	0.293133	1.31552e-09	3.00703e-05
	IL2RG	CD8.7	0.716	0.636	0.293033	3.01224e-08	0.000688538
	AKIRIN2	CD8.7	0.301	0.192	0.292952	5.0443e-09	0.000115303
	ACTG1	CD8.7	0.944	0.904	0.292822	2.30405e-12	5.2666e-08
	REEP5	CD8.7	0.406	0.269	0.292515	7.88509e-10	1.80237e-05
	TUBA4A	CD8.7	0.424	0.304	0.292089	1.22148e-10	2.79205e-06
	GBP4	CD8.7	0.217	0.118	0.291554	3.49084e-07	0.00797936
	OAZ1	CD8.7	0.866	0.777	0.291516	5.45468e-09	0.000124683
	PARK7	CD8.7	0.621	0.496	0.291475	9.91823e-07	0.0226711
	GBP1	CD8.7	0.208	0.113	0.291426	3.91207e-11	8.94222e-07
	CCL4L2	CD8.7	0.146	0.062	0.290616	2.2038e-10	5.03745e-06
	ARPC5L	CD8.7	0.481	0.333	0.290381	2.42886e-07	0.00555188
	TAP2	CD8.7	0.35	0.236	0.289204	5.04923e-08	0.00115415
	ARHGAP25	CD8.7	0.312	0.19	0.288976	6.23855e-08	0.00142601
	CALR	CD8.7	0.627	0.515	0.288866	3.96848e-07	0.00907114
	ZBTB38	CD8.7	0.389	0.242	0.288017	1.16452e-06	0.0266185
	RAB5IF	CD8.7	0.379	0.242	0.287861	7.99868e-17	1.82834e-12
	ADA	CD8.7	0.188	0.085	0.286589	2.02017e-09	4.6177e-05
	RNF19A	CD8.7	0.308	0.189	0.286541	1.38773e-09	3.17207e-05
	CSK	CD8.7	0.483	0.36	0.285971	2.53693e-07	0.00579892
	AOAH	CD8.7	0.333	0.175	0.285967	1.70113e-10	3.88844e-06
	UCP2	CD8.7	0.657	0.561	0.285879	6.31084e-11	1.44253e-06
	MCOLN2	CD8.7	0.146	0.048	0.285745	4.11164e-13	9.39838e-09
	YWHAB	CD8.7	0.83	0.732	0.2853	5.86632e-12	1.34092e-07
	FNBP1	CD8.7	0.5	0.37	0.285006	1.05438e-06	0.024101
	NDUFB10	CD8.7	0.537	0.406	0.284644	4.72497e-09	0.000108003
	PDLIM1	CD8.7	0.114	0.032	0.28449	2.08634e-12	4.76895e-08
	TRG-AS1	CD8.7	0.304	0.181	0.284067	4.74054e-09	0.000108359
	TMSB4X	CD8.7	0.999	0.997	0.283622	6.51345e-37	1.48884e-32
	SLAMF7	CD8.7	0.217	0.098	0.283367	1.21949e-07	0.00278752
	RAB37	CD8.7	0.234	0.119	0.282336	1.59406e-08	0.000364371
	RAB27A	CD8.7	0.284	0.157	0.282039	9.48721e-08	0.00216859
	MAP2K2	CD8.7	0.387	0.279	0.281081	1.01443e-08	0.000231878
	KLRC4	CD8.7	0.282	0.16	0.280761	2.52972e-08	0.000578244
	ATP5IF1	CD8.7	0.62	0.502	0.279226	1.90268e-07	0.00434915
	NDUFA13	CD8.7	0.604	0.501	0.279125	2.94871e-07	0.00674017
	POMP	CD8.7	0.491	0.341	0.278738	1.12575e-08	0.000257325
	HNRNPLL	CD8.7	0.203	0.108	0.278436	6.35274e-09	0.000145211
	SLC25A5	CD8.7	0.563	0.462	0.278165	1.44845e-06	0.0331087
	B3GNT2	CD8.7	0.222	0.12	0.278159	8.71019e-07	0.0199098
	MFSD10	CD8.7	0.375	0.257	0.277729	5.65711e-08	0.0012931
	HLA-B	CD8.7	0.997	0.986	0.276811	9.54049e-28	2.18076e-23
	PSMA7	CD8.7	0.624	0.501	0.276675	1.63326e-13	3.7333e-09
	ARPC4	CD8.7	0.473	0.356	0.275709	5.68405e-07	0.0129926
	HSP90AA1	CD8.7	0.836	0.739	0.274612	1.84404e-12	4.2151e-08
	EMB	CD8.7	0.514	0.382	0.27427	2.20934e-07	0.00505012
	PTP4A2	CD8.7	0.71	0.566	0.274229	2.50951e-12	5.73624e-08
	ITGAL	CD8.7	0.361	0.23	0.274071	2.0372e-11	4.65663e-07
	PSMB2	CD8.7	0.311	0.197	0.273693	4.44655e-14	1.01639e-09
	TPST2	CD8.7	0.427	0.263	0.273541	3.74485e-09	8.55999e-05
	CASP4	CD8.7	0.354	0.234	0.273363	1.82041e-14	4.16109e-10
	IL10RA	CD8.7	0.499	0.363	0.272753	1.40225e-09	3.20525e-05
	WNK1	CD8.7	0.359	0.235	0.270057	1.9463e-06	0.0444885
	FCRL3	CD8.7	0.151	0.063	0.269757	9.088e-08	0.00207734
	GNAI2	CD8.7	0.592	0.482	0.269295	5.62219e-08	0.00128512
	ELOB	CD8.7	0.741	0.635	0.269106	3.33099e-07	0.00761398
	MRPL54	CD8.7	0.399	0.286	0.268935	3.22031e-08	0.000736098
	TAPBP	CD8.7	0.513	0.386	0.268631	9.54512e-11	2.18182e-06
	THEMIS	CD8.7	0.357	0.232	0.26751	1.67469e-06	0.0382801
	ACTN4	CD8.7	0.314	0.19	0.265836	3.95846e-10	9.04825e-06
	ANXA6	CD8.7	0.618	0.496	0.265602	5.58926e-07	0.0127759
	SLAMF6	CD8.7	0.243	0.134	0.263576	3.94793e-10	9.02418e-06
	IKZF3	CD8.7	0.36	0.23	0.263013	1.83276e-09	4.18932e-05
	ATP5MF	CD8.7	0.581	0.46	0.261975	1.80189e-09	4.11875e-05
	PSMA4	CD8.7	0.308	0.195	0.26155	1.194e-06	0.0272926
	SIT1	CD8.7	0.287	0.19	0.260203	2.9934e-09	6.84232e-05
	CAPN2	CD8.7	0.433	0.313	0.25964	1.08365e-06	0.0247701
	CXCR4	CD8.7	0.715	0.603	0.259051	4.9485e-07	0.0113113
	MIS18BP1	CD8.7	0.23	0.128	0.257552	2.44419e-08	0.000558692
	COPE	CD8.7	0.507	0.388	0.257321	3.44009e-10	7.86335e-06
	ARPC2	CD8.7	0.877	0.777	0.256879	6.82719e-16	1.56056e-11
	PYHIN1	CD8.7	0.374	0.222	0.256669	2.34403e-12	5.35799e-08
	COX5A	CD8.7	0.523	0.404	0.255785	3.15562e-13	7.21313e-09
	ARRB2	CD8.7	0.493	0.37	0.255452	1.094e-07	0.00250067
	BTG3	CD8.7	0.184	0.091	0.255434	1.78261e-10	4.0747e-06
	MYL12B	CD8.7	0.865	0.773	0.254852	2.67652e-11	6.11798e-07
	RAC2	CD8.7	0.84	0.776	0.254725	2.118e-09	4.84132e-05
	ZYX	CD8.7	0.495	0.404	0.254376	4.09861e-07	0.0093686
	GNG2	CD8.7	0.48	0.328	0.25432	6.63284e-09	0.000151613
	ARL4C	CD8.7	0.722	0.59	0.253994	3.90594e-07	0.00892821
	ZFP36	CD8.7	0.721	0.624	0.253326	6.62386e-07	0.0151408
	KLF6	CD8.7	0.695	0.585	0.253083	1.19226e-08	0.000272528
	LY6E	CD8.7	0.681	0.584	0.252824	6.76874e-08	0.0015472
	DZIP3	CD8.7	0.13	0.053	0.252635	5.34001e-12	1.22062e-07
	MAD1L1	CD8.7	0.312	0.205	0.251663	7.15358e-08	0.00163517
	PPBP	CD8.8	0.168	0.005	2.12028	3.78267e-35	8.64642e-31
	NRGN	CD8.8	0.165	0.005	1.79214	1.22646e-33	2.80345e-29
	TUBB1	CD8.8	0.1	0.001	0.933079	6.89326e-23	1.57566e-18
	CAVIN2	CD8.8	0.11	0.001	0.860158	1.77981e-24	4.06829e-20
	GNLY	CD8.8	0.723	0.408	0.802251	2.53309e-31	5.79015e-27
	PF4	CD8.8	0.102	0.001	0.758891	8.88346e-22	2.03058e-17
	SPARC	CD8.8	0.107	0.001	0.714958	1.76182e-24	4.02718e-20
	CCL5	CD8.8	0.868	0.605	0.678966	7.04205e-28	1.60967e-23
	CMC1	CD8.8	0.482	0.343	0.666939	2.88658e-09	6.59814e-05
	GNG11	CD8.8	0.1	0.001	0.65253	1.38328e-23	3.16189e-19
	GZMH	CD8.8	0.626	0.364	0.635102	3.31138e-26	7.56914e-22
	HIST1H2AC	CD8.8	0.16	0.082	0.622286	7.3993e-07	0.0169133
	HIST1H1E	CD8.8	0.572	0.491	0.622234	5.08274e-09	0.000116181
	NKG7	CD8.8	0.868	0.585	0.541651	4.3089e-27	9.84928e-23
	GZMA	CD8.8	0.722	0.523	0.531888	4.23575e-17	9.68207e-13
	KLRD1	CD8.8	0.438	0.322	0.507822	4.76187e-08	0.00108847
	CST7	CD8.8	0.71	0.542	0.507696	8.57678e-18	1.96048e-13
	PLEK	CD8.8	0.411	0.287	0.502814	3.78678e-09	8.65581e-05
	FGFBP2	CD8.8	0.428	0.271	0.449132	1.05695e-10	2.41598e-06
	EFHD2	CD8.8	0.47	0.359	0.44905	3.78881e-07	0.00866046
	MT-ND2	CD8.8	0.925	0.911	0.408342	9.80521e-12	2.24128e-07
	CST3	CD8.8	0.117	0.045	0.407413	7.16752e-07	0.0163835
	MT-CO1	CD8.8	0.998	0.998	0.37277	3.0402e-25	6.94929e-21
	MT-ND4	CD8.8	0.927	0.935	0.356779	1.95362e-11	4.46558e-07
	MT-ND5	CD8.8	0.891	0.879	0.33237	1.61136e-10	3.68324e-06
	PTPRC	CD8.8	0.902	0.896	0.294314	1.95899e-09	4.47785e-05
	HLA-C	CD8.8	0.983	0.979	0.285336	1.78013e-14	4.06902e-10
	MT-CO2	CD8.8	0.997	0.998	0.272163	1.22471e-11	2.79944e-07
	MT-ND1	CD8.8	0.912	0.916	0.268068	3.54983e-08	0.00081142
	GZMB	CD8.8	0.411	0.278	0.263308	1.68152e-06	0.0384362
	MT-ATP6	CD8.8	0.988	0.985	0.25228	1.92141e-08	0.000439195
	B2M	CD8.8	1	1	0.25198	9.66193e-15	2.20852e-10
	CCR7	CD4.1	0.687	0.191	1.46925	3.76152e-133	8.59809e-129
	LEF1	CD4.1	0.711	0.255	1.24776	2.08923e-106	4.77556e-102
	TCF7	CD4.1	0.781	0.39	1.13927	2.72288e-88	6.22397e-84
	TSHZ2	CD4.1	0.367	0.039	1.1255	3.53603e-78	8.08266e-74
	MAL	CD4.1	0.617	0.205	1.11857	1.69322e-81	3.87036e-77
	MYC	CD4.1	0.535	0.185	1.0927	8.81861e-61	2.01576e-56
	SELL	CD4.1	0.804	0.36	1.03172	4.06103e-83	9.2827e-79
	PRKCQ-AS1	CD4.1	0.576	0.238	1.03099	8.10372e-62	1.85235e-57
	FHIT	CD4.1	0.361	0.049	1.02189	9.62039e-76	2.19903e-71
	SOCS3	CD4.1	0.482	0.175	1.00406	1.56873e-55	3.58581e-51
	ADTRP	CD4.1	0.294	0.024	0.968972	3.15432e-64	7.21015e-60
	IL6ST	CD4.1	0.393	0.111	0.939618	4.01738e-58	9.18293e-54
	LTB	CD4.1	0.918	0.546	0.935661	1.25303e-78	2.86417e-74
	NOSIP	CD4.1	0.771	0.438	0.875459	7.56691e-74	1.72964e-69
	GAS5	CD4.1	0.731	0.455	0.852636	1.79893e-41	4.11199e-37
	EEF1G	CD4.1	0.848	0.692	0.817244	8.27595e-70	1.89172e-65
	CHRM3-AS2	CD4.1	0.278	0.056	0.797769	2.68522e-39	6.13787e-35
	TRABD2A	CD4.1	0.387	0.119	0.79017	1.03739e-44	2.37126e-40
	PIM1	CD4.1	0.589	0.318	0.789574	2.18036e-37	4.98386e-33
	SNHG29	CD4.1	0.807	0.585	0.768028	7.22122e-53	1.65063e-48
	SLC40A1	CD4.1	0.243	0.042	0.748819	7.16988e-35	1.63889e-30
	PIM2	CD4.1	0.469	0.216	0.739773	1.13372e-28	2.59145e-24
	PIK3IP1	CD4.1	0.558	0.286	0.738124	1.47384e-37	3.36891e-33
	RPS13	CD4.1	0.999	0.986	0.73331	5.25883e-158	1.20206e-153
	LDHB	CD4.1	0.928	0.697	0.72837	7.07575e-73	1.61738e-68
	RCAN3	CD4.1	0.463	0.209	0.721718	2.77942e-42	6.35321e-38
	CD4	CD4.1	0.306	0.07	0.71362	1.37716e-41	3.1479e-37
	EEF1B2	CD4.1	0.982	0.909	0.710223	9.47015e-95	2.16469e-90
	GIMAP5	CD4.1	0.547	0.307	0.700699	4.10952e-31	9.39353e-27
	PABPC1	CD4.1	0.943	0.831	0.659548	1.45681e-76	3.32998e-72
	RPS5	CD4.1	0.991	0.949	0.659435	7.23147e-107	1.65297e-102
	SATB1	CD4.1	0.383	0.161	0.653208	7.87142e-37	1.79925e-32
	SESN3	CD4.1	0.301	0.106	0.648333	1.53573e-27	3.51037e-23
	RPL22	CD4.1	0.993	0.943	0.636556	1.01206e-90	2.31337e-86
	ANKRD55	CD4.1	0.168	0.012	0.63034	4.70802e-39	1.07616e-34
	RPS8	CD4.1	1	0.991	0.628891	6.078e-143	1.38931e-138
	FOXP1	CD4.1	0.63	0.376	0.627518	1.71507e-36	3.92031e-32
	RPL32	CD4.1	1	0.994	0.623223	9.03099e-138	2.0643e-133
	TRAT1	CD4.1	0.391	0.184	0.621679	3.49193e-18	7.98185e-14
	ACTN1	CD4.1	0.281	0.079	0.616091	3.06002e-38	6.99458e-34
	CAMK4	CD4.1	0.529	0.283	0.610033	1.29518e-38	2.96053e-34
	EIF3E	CD4.1	0.835	0.606	0.602367	9.95943e-42	2.27653e-37
	RPS3A	CD4.1	1	0.997	0.594581	2.6737e-123	6.11155e-119
	ABLIM1	CD4.1	0.435	0.221	0.592316	2.9156e-30	6.66449e-26
	NPM1	CD4.1	0.948	0.833	0.585099	1.4045e-58	3.2104e-54
	RPL9	CD4.1	0.998	0.979	0.580922	7.75745e-93	1.7732e-88
	LDLRAP1	CD4.1	0.385	0.176	0.577943	4.95122e-30	1.13175e-25
	RPL11	CD4.1	0.999	0.99	0.574614	2.04037e-128	4.66388e-124
	CISH	CD4.1	0.245	0.105	0.568205	9.51867e-14	2.17578e-09
	INPP4B	CD4.1	0.435	0.233	0.557503	5.14404e-27	1.17582e-22
	TMEM123	CD4.1	0.618	0.389	0.554848	1.00745e-30	2.30284e-26
	RPL5	CD4.1	0.992	0.961	0.552496	7.26264e-98	1.6601e-93
	RGS10	CD4.1	0.628	0.393	0.551426	3.27715e-23	7.49092e-19
	TPT1	CD4.1	1	0.994	0.548266	2.29553e-94	5.24712e-90
	RPL30	CD4.1	1	0.996	0.546642	2.80271e-132	6.40644e-128
	EPHX2	CD4.1	0.236	0.068	0.537806	5.38962e-31	1.23196e-26
	GIMAP1	CD4.1	0.472	0.283	0.535285	5.238e-19	1.1973e-14
	TCEA3	CD4.1	0.204	0.048	0.535033	5.96716e-27	1.36397e-22
	RPS23	CD4.1	1	0.992	0.534466	8.03341e-122	1.83628e-117
	FLT3LG	CD4.1	0.596	0.384	0.533239	2.06129e-24	4.71169e-20
	PCED1B	CD4.1	0.341	0.168	0.532579	1.11326e-22	2.54468e-18
	RPL18	CD4.1	0.994	0.973	0.530547	3.19451e-88	7.302e-84
	NOP53	CD4.1	0.829	0.67	0.528523	2.88485e-23	6.5942e-19
	SARAF	CD4.1	0.957	0.844	0.528276	4.65553e-46	1.06416e-41
	RPL13	CD4.1	1	0.994	0.525261	1.13199e-117	2.58751e-113
	AC243960.1	CD4.1	0.423	0.234	0.524342	4.43091e-16	1.01282e-11
	OXNAD1	CD4.1	0.438	0.237	0.522866	4.67401e-28	1.06838e-23
	NFKBIZ	CD4.1	0.344	0.168	0.522815	3.71769e-22	8.49789e-18
	UBALD2	CD4.1	0.438	0.296	0.522094	1.57003e-17	3.58877e-13
	SNHG8	CD4.1	0.676	0.478	0.518685	2.08467e-23	4.76513e-19
	ITGA6	CD4.1	0.294	0.117	0.518661	1.13701e-21	2.59898e-17
	SERINC5	CD4.1	0.274	0.116	0.510388	1.26408e-23	2.88943e-19
	RPL35A	CD4.1	0.998	0.984	0.509672	4.83671e-116	1.10557e-111
	RPS12	CD4.1	1	0.999	0.506359	3.54394e-116	8.10073e-112
	RPS25	CD4.1	0.994	0.975	0.50173	9.04329e-86	2.06712e-81
	DGKA	CD4.1	0.388	0.201	0.501523	2.9171e-17	6.66792e-13
	RPL19	CD4.1	0.997	0.988	0.499858	3.39896e-101	7.76935e-97
	RPS6	CD4.1	0.998	0.986	0.49406	1.20608e-88	2.75686e-84
	EEF2	CD4.1	0.921	0.831	0.491776	4.36599e-43	9.97977e-39
	RPL4	CD4.1	0.959	0.878	0.489846	5.6716e-46	1.29641e-41
	CITED4	CD4.1	0.218	0.073	0.489627	1.80633e-19	4.12891e-15
	AIF1	CD4.1	0.232	0.086	0.488019	3.48459e-19	7.96507e-15
	BCL2	CD4.1	0.348	0.191	0.487842	1.96518e-19	4.49202e-15
	RPS16	CD4.1	0.984	0.938	0.487293	5.0282e-47	1.14935e-42
	NDFIP1	CD4.1	0.621	0.425	0.487188	6.89018e-27	1.57496e-22
	SNHG5	CD4.1	0.485	0.309	0.485793	1.93939e-13	4.43305e-09
	EDA	CD4.1	0.152	0.03	0.485195	8.59649e-24	1.96499e-19
	SH3YL1	CD4.1	0.274	0.121	0.484324	2.10585e-17	4.81354e-13
	RPL29	CD4.1	0.991	0.969	0.483574	6.09251e-76	1.39263e-71
	GIMAP7	CD4.1	0.698	0.528	0.48099	5.87774e-17	1.34353e-12
	RPL37	CD4.1	0.999	0.987	0.476434	3.44956e-73	7.885e-69
	MAML2	CD4.1	0.288	0.137	0.475238	2.11277e-13	4.82936e-09
	RPS14	CD4.1	0.999	0.993	0.473852	6.07372e-99	1.38833e-94
	TMIGD2	CD4.1	0.222	0.06	0.470056	4.65964e-28	1.0651e-23
	BEX3	CD4.1	0.242	0.084	0.46717	1.35544e-18	3.09827e-14
	RPS9	CD4.1	0.978	0.944	0.464162	2.93612e-55	6.71138e-51
	TESPA1	CD4.1	0.319	0.164	0.463243	1.28305e-17	2.93279e-13
	SNX9	CD4.1	0.214	0.08	0.459287	8.94538e-26	2.04474e-21
	PCED1B-AS1	CD4.1	0.748	0.596	0.456596	2.86181e-15	6.54154e-11
	RPL24	CD4.1	0.98	0.941	0.45501	3.23509e-63	7.39478e-59
	ST13	CD4.1	0.629	0.434	0.453968	2.52514e-20	5.77196e-16
	BACH2	CD4.1	0.202	0.061	0.45221	5.61281e-25	1.28298e-20
	SNHG7	CD4.1	0.391	0.235	0.45154	1.88905e-11	4.31799e-07
	RPL10A	CD4.1	0.983	0.939	0.445706	6.24183e-56	1.42676e-51
	LINC00861	CD4.1	0.636	0.439	0.443663	7.5546e-21	1.72683e-16
	SNHG32	CD4.1	0.288	0.139	0.443611	8.02105e-11	1.83345e-06
	RPL7	CD4.1	0.965	0.867	0.441854	2.32579e-32	5.31628e-28
	RPL10	CD4.1	1	0.998	0.441595	2.0745e-95	4.74189e-91
	ARMH1	CD4.1	0.255	0.111	0.441078	3.95857e-13	9.0485e-09
	TXK	CD4.1	0.256	0.11	0.43931	1.62865e-17	3.72277e-13
	RPL13A	CD4.1	0.946	0.861	0.43889	4.75266e-30	1.08636e-25
	RPL36	CD4.1	0.991	0.967	0.438389	3.52589e-66	8.05947e-62
	RPS28	CD4.1	0.999	0.994	0.438159	1.51965e-73	3.47362e-69
	AK5	CD4.1	0.161	0.032	0.436598	5.61124e-24	1.28262e-19
	FAM13A	CD4.1	0.112	0.02	0.432757	1.10446e-14	2.52458e-10
	RACK1	CD4.1	0.976	0.935	0.432709	1.21027e-44	2.76643e-40
	RAPGEF6	CD4.1	0.317	0.157	0.432419	4.88568e-21	1.11677e-16
	NACA	CD4.1	0.981	0.951	0.430189	2.92805e-49	6.69293e-45
	EIF3L	CD4.1	0.736	0.552	0.430027	1.20388e-12	2.75182e-08
	CHMP7	CD4.1	0.235	0.098	0.428519	1.76816e-26	4.04166e-22
	RPL12	CD4.1	0.995	0.975	0.428262	1.64441e-73	3.75878e-69
	RPLP2	CD4.1	0.994	0.975	0.426656	2.59635e-61	5.93474e-57
	RPLP1	CD4.1	1	0.996	0.424026	2.06618e-57	4.72288e-53
	USP10	CD4.1	0.257	0.136	0.421857	8.74243e-17	1.99834e-12
	CD27	CD4.1	0.56	0.34	0.419939	1.37808e-21	3.15001e-17
	LINC01550	CD4.1	0.226	0.092	0.419745	1.3035e-18	2.97953e-14
	RPL8	CD4.1	0.987	0.951	0.417267	3.42716e-54	7.83379e-50
	RPL17	CD4.1	0.938	0.861	0.413653	1.45934e-29	3.33575e-25
	TOMM7	CD4.1	0.937	0.851	0.411707	8.30248e-30	1.89778e-25
	SPINT2	CD4.1	0.24	0.103	0.411017	2.8798e-22	6.58264e-18
	RPL18A	CD4.1	0.997	0.982	0.410429	5.58374e-64	1.27633e-59
	AP3M2	CD4.1	0.21	0.09	0.409607	6.6321e-14	1.51596e-09
	EIF3H	CD4.1	0.757	0.58	0.408496	7.0649e-12	1.6149e-07
	RPS18	CD4.1	0.999	0.993	0.408305	1.6162e-65	3.69432e-61
	PRKCA	CD4.1	0.202	0.08	0.40727	9.73196e-20	2.22453e-15
	RSL1D1	CD4.1	0.562	0.392	0.407156	8.26432e-16	1.88906e-11
	ALKBH7	CD4.1	0.469	0.307	0.406387	1.05582e-17	2.41339e-13
	EEF1A1	CD4.1	1	1	0.401857	6.80965e-104	1.55655e-99
	ANP32B	CD4.1	0.695	0.524	0.399438	1.77174e-16	4.04984e-12
	CD55	CD4.1	0.359	0.22	0.398288	4.83186e-14	1.10447e-09
	RPL31	CD4.1	0.942	0.863	0.393801	2.79215e-28	6.38231e-24
	C1orf162	CD4.1	0.414	0.21	0.392652	1.17426e-22	2.68413e-18
	RPS20	CD4.1	0.71	0.55	0.39224	1.17132e-20	2.67739e-16
	RPL34	CD4.1	1	0.999	0.392119	5.54529e-61	1.26754e-56
	RPS4X	CD4.1	0.997	0.984	0.385665	2.78518e-48	6.36636e-44
	CCDC18-AS1	CD4.1	0.333	0.193	0.385336	8.07454e-12	1.84568e-07
	PDK1	CD4.1	0.172	0.056	0.38285	1.63835e-17	3.74495e-13
	RPL38	CD4.1	0.961	0.893	0.380487	9.38959e-27	2.14627e-22
	NSA2	CD4.1	0.635	0.467	0.379256	2.0721e-12	4.7364e-08
	RPS21	CD4.1	0.997	0.983	0.371777	8.2202e-50	1.87897e-45
	IL7R	CD4.1	0.889	0.597	0.370972	1.24332e-29	2.84197e-25
	CMTM8	CD4.1	0.152	0.043	0.370327	4.95713e-21	1.1331e-16
	ATP5PO	CD4.1	0.628	0.47	0.368982	5.03323e-12	1.1505e-07
	SUSD3	CD4.1	0.201	0.085	0.367988	1.47588e-14	3.37358e-10
	MDS2	CD4.1	0.127	0.026	0.36765	6.20658e-18	1.4187e-13
	RPS2	CD4.1	0.989	0.968	0.364298	2.36829e-46	5.41343e-42
	TMEM204	CD4.1	0.227	0.106	0.363415	3.24379e-09	7.41466e-05
	RPL36A	CD4.1	0.958	0.888	0.362706	2.82455e-34	6.45636e-30
	C12orf57	CD4.1	0.848	0.707	0.362249	6.78867e-13	1.55175e-08
	EIF2S3	CD4.1	0.499	0.342	0.360778	1.18374e-14	2.70579e-10
	IL6R	CD4.1	0.161	0.055	0.360035	1.27122e-14	2.90576e-10
	RPL3	CD4.1	0.99	0.972	0.3598	6.78645e-48	1.55125e-43
	SEPTIN6	CD4.1	0.539	0.385	0.359763	1.06223e-14	2.42805e-10
	MLLT3	CD4.1	0.238	0.115	0.359363	1.0989e-20	2.51186e-16
	RPS15A	CD4.1	1	0.998	0.356713	1.58331e-78	3.61913e-74
	HSPB1	CD4.1	0.472	0.327	0.356488	4.54473e-13	1.03883e-08
	DPP4	CD4.1	0.164	0.067	0.355736	4.58369e-13	1.04774e-08
	ZFAS1	CD4.1	0.711	0.552	0.354097	1.93845e-21	4.4309e-17
	RPL39	CD4.1	1	0.999	0.35338	1.20179e-39	2.74706e-35
	SNHG6	CD4.1	0.649	0.495	0.351534	3.82451e-14	8.74206e-10
	RNASET2	CD4.1	0.511	0.364	0.349915	1.89493e-11	4.33143e-07
	IFNGR2	CD4.1	0.129	0.032	0.347672	1.10388e-17	2.52325e-13
	FCMR	CD4.1	0.542	0.387	0.344253	5.8011e-10	1.32601e-05
	THOC3	CD4.1	0.272	0.163	0.337603	3.35848e-11	7.67681e-07
	RPS15	CD4.1	0.995	0.98	0.337279	9.49942e-54	2.17138e-49
	GPR183	CD4.1	0.257	0.141	0.336471	2.60037e-09	5.94393e-05
	PRMT2	CD4.1	0.61	0.447	0.334169	3.72561e-13	8.516e-09
	AC119396.1	CD4.1	0.276	0.159	0.334131	9.88258e-13	2.25896e-08
	RPS27A	CD4.1	1	0.998	0.332954	1.73048e-59	3.95553e-55
	RPL14	CD4.1	0.992	0.978	0.332052	5.74559e-47	1.31333e-42
	IMPDH2	CD4.1	0.304	0.183	0.331952	3.36017e-09	7.68068e-05
	NOG	CD4.1	0.106	0.014	0.32824	6.21613e-17	1.42088e-12
	APP	CD4.1	0.135	0.043	0.327905	8.6511e-12	1.97747e-07
	CD40LG	CD4.1	0.16	0.069	0.327197	3.48775e-08	0.000797229
	MCUB	CD4.1	0.528	0.374	0.32052	4.68342e-09	0.000107054
	RPLP0	CD4.1	0.983	0.952	0.320258	4.09608e-29	9.36281e-25
	RETREG1	CD4.1	0.15	0.061	0.319741	5.53787e-11	1.26585e-06
	RPL21	CD4.1	0.999	0.993	0.319209	5.31258e-33	1.21435e-28
	PPA1	CD4.1	0.427	0.289	0.318442	5.04362e-10	1.15287e-05
	RPS17	CD4.1	0.676	0.529	0.317051	1.62545e-09	3.71546e-05
	PLEKHB1	CD4.1	0.167	0.066	0.316584	8.39727e-11	1.91945e-06
	AQP3	CD4.1	0.361	0.216	0.313755	5.98612e-13	1.36831e-08
	APBB1	CD4.1	0.203	0.101	0.313542	3.66527e-10	8.37808e-06
	AC005842.1	CD4.1	0.109	0.024	0.312658	5.26769e-13	1.20409e-08
	TGFBR2	CD4.1	0.375	0.247	0.308632	3.0962e-09	7.07728e-05
	CD7	CD4.1	0.755	0.594	0.306746	3.15664e-14	7.21545e-10
	RPS3	CD4.1	0.999	0.993	0.304454	2.55527e-53	5.84083e-49
	PSIP1	CD4.1	0.492	0.356	0.303786	1.68128e-10	3.84306e-06
	ATP1A1	CD4.1	0.381	0.256	0.303773	2.51766e-10	5.75486e-06
	ARID5B	CD4.1	0.309	0.204	0.300617	1.05303e-10	2.40703e-06
	EPB41L4A-AS1	CD4.1	0.301	0.186	0.300172	6.05753e-09	0.000138463
	LEF1-AS1	CD4.1	0.117	0.03	0.298333	9.41282e-17	2.15158e-12
	FAU	CD4.1	0.99	0.973	0.296013	8.46598e-41	1.93515e-36
	RPL27	CD4.1	0.957	0.914	0.293329	3.86275e-07	0.00882947
	SERP1	CD4.1	0.701	0.555	0.292621	9.72227e-12	2.22232e-07
	RPS11	CD4.1	0.9	0.804	0.290556	1.71068e-15	3.91028e-11
	TTN	CD4.1	0.126	0.051	0.290455	3.87332e-08	0.000885364
	RPL28	CD4.1	0.999	0.993	0.289742	1.2972e-41	2.96515e-37
	RPL37A	CD4.1	0.974	0.939	0.289637	2.69192e-18	6.15318e-14
	JAK3	CD4.1	0.285	0.173	0.287469	1.06958e-10	2.44485e-06
	CSGALNACT1	CD4.1	0.124	0.044	0.287143	5.58509e-10	1.27664e-05
	FOXO1	CD4.1	0.213	0.118	0.285929	8.33993e-14	1.90634e-09
	FYB1	CD4.1	0.788	0.641	0.285352	2.15766e-13	4.93199e-09
	UBA52	CD4.1	0.967	0.93	0.284273	4.92075e-21	1.12479e-16
	RPSA	CD4.1	0.987	0.962	0.282391	1.95267e-31	4.4634e-27
	PABPC4	CD4.1	0.244	0.144	0.281828	2.2849e-08	0.000522282
	LIMD2	CD4.1	0.827	0.696	0.280432	2.27793e-08	0.00052069
	RPL7A	CD4.1	0.987	0.97	0.277859	1.11311e-32	2.54435e-28
	HSPD1	CD4.1	0.371	0.255	0.276428	2.13122e-07	0.00487153
	EPHB6	CD4.1	0.104	0.038	0.275425	9.99048e-14	2.28362e-09
	ADPRM	CD4.1	0.127	0.05	0.274387	7.81827e-11	1.7871e-06
	RPL23	CD4.1	0.793	0.66	0.273875	1.43445e-07	0.00327887
	SSBP2	CD4.1	0.154	0.068	0.272717	2.04538e-09	4.67534e-05
	LGALS3BP	CD4.1	0.124	0.042	0.26922	2.58873e-12	5.91732e-08
	BIRC3	CD4.1	0.23	0.139	0.265421	6.4253e-08	0.0014687
	UXT	CD4.1	0.672	0.539	0.265137	6.7824e-07	0.0155032
	RAB3GAP1	CD4.1	0.139	0.063	0.265004	8.01102e-09	0.000183116
	RPS27	CD4.1	1	1	0.264352	6.52198e-34	1.49079e-29
	GSTM2	CD4.1	0.112	0.03	0.264091	8.4092e-17	1.92217e-12
	COX4I1	CD4.1	0.931	0.861	0.263688	1.47299e-11	3.36696e-07
	NAP1L1	CD4.1	0.586	0.45	0.262818	9.40014e-09	0.000214868
	RIC3	CD4.1	0.162	0.082	0.262756	1.11744e-14	2.55424e-10
	THEM4	CD4.1	0.29	0.19	0.258614	9.13851e-15	2.08888e-10
	PDE3B	CD4.1	0.301	0.199	0.258454	1.14372e-06	0.0261431
	LINC00402	CD4.1	0.126	0.061	0.257812	2.73924e-07	0.00626135
	NCF1	CD4.1	0.204	0.115	0.257226	4.67729e-10	1.06913e-05
	PLCL1	CD4.1	0.108	0.034	0.25711	3.37334e-11	7.71078e-07
	LINS1	CD4.1	0.186	0.102	0.25533	3.39912e-08	0.000776972
	SMDT1	CD4.1	0.597	0.468	0.254207	4.10679e-09	9.38731e-05
	IL4R	CD4.1	0.161	0.081	0.253995	1.46091e-07	0.00333934
	PPP1R2	CD4.1	0.508	0.388	0.250035	1.79645e-09	4.10632e-05
	LTB	CD4.2	0.914	0.568	1.0322	5.47858e-77	1.25229e-72
	MAL	CD4.2	0.603	0.23	0.921636	1.39812e-49	3.19581e-45
	SOCS3	CD4.2	0.483	0.193	0.921214	5.76903e-45	1.31868e-40
	AQP3	CD4.2	0.51	0.217	0.832637	1.77317e-43	4.05312e-39
	TCF7	CD4.2	0.735	0.415	0.813259	1.45864e-46	3.33416e-42
	GPR183	CD4.2	0.394	0.141	0.802687	9.04649e-34	2.06785e-29
	CD4	CD4.2	0.336	0.082	0.708066	8.78027e-49	2.00699e-44
	SELL	CD4.2	0.696	0.391	0.69898	3.1314e-34	7.15775e-30
	PASK	CD4.2	0.346	0.129	0.695407	6.86711e-25	1.56968e-20
	INPP4B	CD4.2	0.504	0.242	0.670125	3.32114e-28	7.59146e-24
	LDHB	CD4.2	0.923	0.711	0.669955	2.42791e-49	5.54972e-45
	LIMS1	CD4.2	0.34	0.119	0.666883	2.29012e-32	5.23476e-28
	IL7R	CD4.2	0.911	0.613	0.642738	1.51491e-48	3.46279e-44
	TSHZ2	CD4.2	0.264	0.064	0.640241	2.29206e-30	5.2392e-26
	LEF1	CD4.2	0.59	0.287	0.639301	2.38828e-35	5.45913e-31
	RNASET2	CD4.2	0.618	0.367	0.622032	6.36513e-31	1.45494e-26
	RCAN3	CD4.2	0.467	0.224	0.618207	1.99967e-25	4.57084e-21
	CORO1B	CD4.2	0.485	0.257	0.606826	9.00125e-25	2.0575e-20
	CCR7	CD4.2	0.508	0.229	0.599853	2.63815e-28	6.03028e-24
	PIM2	CD4.2	0.452	0.231	0.582632	1.63923e-18	3.74695e-14
	MYC	CD4.2	0.434	0.211	0.574408	3.02831e-18	6.92212e-14
	BIRC3	CD4.2	0.321	0.14	0.551501	7.32309e-20	1.67391e-15
	TMEM123	CD4.2	0.631	0.402	0.536536	4.34383e-24	9.92913e-20
	CD40LG	CD4.2	0.232	0.071	0.530046	4.72512e-26	1.08007e-21
	JUNB	CD4.2	0.853	0.759	0.525006	3.82395e-17	8.74078e-13
	NOSIP	CD4.2	0.686	0.462	0.521953	6.86965e-20	1.57026e-15
	TRAT1	CD4.2	0.402	0.196	0.514782	1.91124e-24	4.36872e-20
	FOS	CD4.2	0.634	0.491	0.509611	6.40848e-16	1.46485e-11
	PABPC1	CD4.2	0.932	0.838	0.506988	7.90796e-35	1.8076e-30
	SLC40A1	CD4.2	0.187	0.056	0.491562	3.341e-23	7.63686e-19
	FXYD5	CD4.2	0.907	0.801	0.487551	9.27279e-38	2.11957e-33
	SESN3	CD4.2	0.269	0.119	0.482911	3.86088e-13	8.8252e-09
	AP3M2	CD4.2	0.241	0.096	0.482694	3.33185e-22	7.61594e-18
	RPS8	CD4.2	0.999	0.992	0.471557	2.672e-72	6.10767e-68
	IL6ST	CD4.2	0.29	0.133	0.470113	5.4286e-17	1.24087e-12
	TRADD	CD4.2	0.43	0.242	0.467546	4.85339e-11	1.10939e-06
	FYB1	CD4.2	0.815	0.648	0.46215	1.77416e-22	4.05537e-18
	TPT1	CD4.2	0.998	0.995	0.460182	9.82201e-62	2.24511e-57
	ARID5B	CD4.2	0.386	0.207	0.45237	2.00432e-21	4.58148e-17
	GIMAP5	CD4.2	0.504	0.323	0.449805	6.01845e-15	1.3757e-10
	EEF2	CD4.2	0.92	0.837	0.448428	4.04378e-29	9.24327e-25
	PLP2	CD4.2	0.558	0.34	0.445193	9.77265e-19	2.23383e-14
	EEF1G	CD4.2	0.803	0.703	0.443266	2.6489e-19	6.05486e-15
	SERINC5	CD4.2	0.285	0.125	0.441222	1.56824e-15	3.58468e-11
	DGKA	CD4.2	0.394	0.212	0.42365	2.59914e-14	5.94111e-10
	CAMK4	CD4.2	0.485	0.299	0.422738	4.80216e-14	1.09768e-09
	PIM1	CD4.2	0.519	0.338	0.419153	7.01026e-12	1.60241e-07
	TESPA1	CD4.2	0.33	0.173	0.418845	3.2845e-10	7.50772e-06
	IL6R	CD4.2	0.195	0.059	0.418025	8.98287e-18	2.0533e-13
	COTL1	CD4.2	0.665	0.409	0.412337	4.1514e-19	9.48927e-15
	RPL4	CD4.2	0.953	0.883	0.411534	7.71916e-28	1.76445e-23
	CYLD	CD4.2	0.461	0.288	0.401078	6.33335e-16	1.44768e-11
	VIM	CD4.2	0.924	0.829	0.400908	8.10754e-18	1.85322e-13
	CD27	CD4.2	0.561	0.352	0.396594	3.72793e-13	8.52131e-09
	CD82	CD4.2	0.275	0.12	0.395284	1.26493e-15	2.89139e-11
	RPL22	CD4.2	0.987	0.947	0.393433	1.04791e-38	2.39532e-34
	SLC2A3	CD4.2	0.475	0.305	0.39281	4.59741e-12	1.05088e-07
	FOXP1	CD4.2	0.583	0.393	0.388587	5.42105e-12	1.23914e-07
	USP10	CD4.2	0.277	0.142	0.385185	1.20343e-11	2.7508e-07
	PLSCR3	CD4.2	0.466	0.295	0.385117	5.06013e-14	1.15664e-09
	RPLP1	CD4.2	0.999	0.996	0.38224	9.47554e-46	2.16592e-41
	RPL11	CD4.2	0.999	0.991	0.378304	8.58915e-54	1.96331e-49
	NFKBIZ	CD4.2	0.323	0.179	0.377294	6.91851e-12	1.58143e-07
	PIK3IP1	CD4.2	0.48	0.305	0.37371	1.41351e-10	3.23101e-06
	CTSB	CD4.2	0.25	0.105	0.372729	9.68492e-20	2.21378e-15
	SH3YL1	CD4.2	0.267	0.13	0.372095	5.11043e-12	1.16814e-07
	BEX3	CD4.2	0.23	0.094	0.371731	1.35189e-18	3.09014e-14
	RPL13A	CD4.2	0.936	0.866	0.370919	4.6992e-21	1.07414e-16
	RPL36	CD4.2	0.99	0.968	0.370788	1.9226e-34	4.39468e-30
	MARCKSL1	CD4.2	0.285	0.146	0.36949	2.25865e-14	5.16281e-10
	SARAF	CD4.2	0.945	0.852	0.3694	2.84052e-26	6.49286e-22
	CMTM8	CD4.2	0.168	0.049	0.36818	4.54652e-20	1.03924e-15
	PRKCQ-AS1	CD4.2	0.433	0.265	0.366758	2.57955e-12	5.89634e-08
	GSTK1	CD4.2	0.77	0.627	0.366606	3.18335e-14	7.2765e-10
	TCEA3	CD4.2	0.175	0.059	0.361063	1.5096e-15	3.45065e-11
	ARMH1	CD4.2	0.245	0.12	0.360482	1.57509e-12	3.60033e-08
	RPL32	CD4.2	0.999	0.994	0.360311	3.81541e-46	8.72126e-42
	GAS5	CD4.2	0.649	0.475	0.358477	2.4366e-10	5.56959e-06
	RPS18	CD4.2	0.998	0.993	0.358117	1.34517e-41	3.0748e-37
	RPS6	CD4.2	0.997	0.987	0.357689	3.07256e-44	7.02326e-40
	RPL13	CD4.2	1	0.995	0.357567	1.84559e-47	4.21864e-43
	RPS13	CD4.2	0.998	0.987	0.357044	2.24055e-46	5.12145e-42
	SNHG29	CD4.2	0.746	0.601	0.35658	3.56225e-10	8.1426e-06
	RPL36A	CD4.2	0.956	0.892	0.356308	2.34677e-29	5.36425e-25
	EEF1B2	CD4.2	0.97	0.914	0.354292	7.80539e-20	1.78416e-15
	LPAR6	CD4.2	0.189	0.084	0.354188	1.34551e-12	3.07558e-08
	EIF3E	CD4.2	0.789	0.622	0.353945	1.01451e-08	0.000231897
	PELI1	CD4.2	0.197	0.086	0.352874	2.13004e-12	4.86885e-08
	FLT3LG	CD4.2	0.569	0.398	0.351418	7.08202e-13	1.61881e-08
	HINT1	CD4.2	0.922	0.828	0.350648	5.95687e-20	1.36162e-15
	RPL9	CD4.2	0.996	0.98	0.349655	1.63569e-28	3.73887e-24
	APP	CD4.2	0.162	0.047	0.344113	1.49916e-17	3.42677e-13
	CRIP2	CD4.2	0.172	0.065	0.342962	4.43417e-11	1.01356e-06
	RGCC	CD4.2	0.289	0.158	0.342232	7.26675e-14	1.66103e-09
	RPL5	CD4.2	0.99	0.963	0.341602	3.24127e-26	7.4089e-22
	CD5	CD4.2	0.392	0.235	0.337464	1.43193e-08	0.00032731
	SPINT2	CD4.2	0.236	0.111	0.336014	9.84018e-10	2.24927e-05
	RPL7	CD4.2	0.952	0.873	0.335854	2.77137e-20	6.33481e-16
	CD69	CD4.2	0.634	0.501	0.334431	5.59199e-11	1.27822e-06
	LINC00402	CD4.2	0.169	0.062	0.33406	3.04563e-12	6.96171e-08
	RPL37	CD4.2	0.998	0.988	0.332146	1.72001e-37	3.93161e-33
	TTC39C	CD4.2	0.423	0.275	0.327462	2.02482e-08	0.000462834
	RPL29	CD4.2	0.991	0.971	0.327102	1.67567e-37	3.83026e-33
	EEF1A1	CD4.2	1	1	0.325965	2.89501e-62	6.61742e-58
	MCUB	CD4.2	0.551	0.382	0.32282	5.53422e-09	0.000126501
	RPS5	CD4.2	0.982	0.952	0.321547	2.19769e-27	5.02348e-23
	ARHGAP15	CD4.2	0.575	0.417	0.321391	8.16719e-11	1.86686e-06
	RPS25	CD4.2	0.993	0.976	0.31867	1.80746e-34	4.1315e-30
	SUSD3	CD4.2	0.205	0.092	0.318567	7.77133e-15	1.77637e-10
	CHRM3-AS2	CD4.2	0.172	0.074	0.314163	7.01891e-08	0.00160438
	RPL18A	CD4.2	0.997	0.983	0.312643	7.69551e-38	1.75904e-33
	RPS12	CD4.2	0.999	0.999	0.311429	5.96971e-40	1.36456e-35
	RPL39	CD4.2	1	0.999	0.309632	1.15085e-34	2.63062e-30
	CD28	CD4.2	0.21	0.099	0.309005	3.48239e-10	7.96005e-06
	TRABD2A	CD4.2	0.257	0.141	0.307812	4.16411e-08	0.000951833
	RPS20	CD4.2	0.702	0.56	0.307286	9.08834e-08	0.00207741
	RPS4X	CD4.2	0.996	0.985	0.30504	2.48481e-27	5.67977e-23
	RPL10A	CD4.2	0.979	0.942	0.304917	1.26416e-18	2.88961e-14
	ANP32B	CD4.2	0.701	0.534	0.300708	2.18826e-07	0.00500192
	THOC3	CD4.2	0.29	0.169	0.30016	1.79664e-08	0.000410675
	RPL18	CD4.2	0.992	0.975	0.299572	1.84739e-31	4.22277e-27
	RPL30	CD4.2	0.999	0.996	0.29857	7.38297e-36	1.6876e-31
	RPL8	CD4.2	0.985	0.954	0.298501	2.01773e-23	4.61213e-19
	BCL2	CD4.2	0.33	0.201	0.293513	3.63773e-09	8.31512e-05
	RACK1	CD4.2	0.968	0.937	0.293245	9.08928e-21	2.07763e-16
	TAB2	CD4.2	0.246	0.14	0.292371	1.00156e-14	2.28936e-10
	RPL19	CD4.2	0.996	0.988	0.29203	1.91159e-34	4.36951e-30
	RPL12	CD4.2	0.992	0.976	0.291582	4.58572e-27	1.0482e-22
	FBLN7	CD4.2	0.116	0.025	0.291434	4.89424e-17	1.11872e-12
	CD6	CD4.2	0.445	0.301	0.291404	1.31829e-07	0.00301336
	RPLP2	CD4.2	0.993	0.976	0.287325	2.1692e-27	4.95836e-23
	RPS16	CD4.2	0.974	0.941	0.287317	3.99547e-19	9.13285e-15
	SNHG8	CD4.2	0.642	0.492	0.286409	3.30992e-12	7.56581e-08
	CDC14A	CD4.2	0.25	0.14	0.286275	7.39115e-07	0.0168947
	RPS3A	CD4.2	0.999	0.997	0.284985	1.43415e-35	3.27818e-31
	SIRPG	CD4.2	0.256	0.137	0.28352	3.14017e-08	0.00071778
	PPP1R2	CD4.2	0.545	0.393	0.279984	1.66229e-08	0.000379967
	PVT1	CD4.2	0.162	0.066	0.279244	6.92961e-11	1.58397e-06
	RPL34	CD4.2	1	0.999	0.278554	4.21558e-28	9.63596e-24
	RPL17	CD4.2	0.925	0.866	0.277473	5.93048e-09	0.000135559
	THEM4	CD4.2	0.312	0.195	0.275727	2.5554e-09	5.84113e-05
	AC119396.1	CD4.2	0.282	0.166	0.275491	1.78785e-09	4.08666e-05
	TNFSF8	CD4.2	0.192	0.103	0.275441	7.91547e-08	0.00180932
	NPM1	CD4.2	0.924	0.841	0.2747	3.45248e-13	7.89169e-09
	RPL35A	CD4.2	0.995	0.985	0.269068	5.12938e-33	1.17247e-28
	RPS17	CD4.2	0.671	0.538	0.26894	9.65979e-07	0.0220803
	RPS2	CD4.2	0.99	0.969	0.268379	1.47913e-23	3.381e-19
	ICOS	CD4.2	0.133	0.047	0.267936	8.41381e-09	0.000192323
	FAAH2	CD4.2	0.123	0.038	0.267083	2.63192e-09	6.01605e-05
	RPS28	CD4.2	0.998	0.994	0.266625	1.35849e-26	3.10523e-22
	TIAM1	CD4.2	0.124	0.042	0.265629	1.39529e-12	3.18935e-08
	RPLP0	CD4.2	0.98	0.954	0.263621	1.74315e-23	3.98448e-19
	PBXIP1	CD4.2	0.403	0.276	0.262227	7.28748e-08	0.00166577
	RPL10	CD4.2	1	0.998	0.262006	5.486e-30	1.25399e-25
	LINC02273	CD4.2	0.157	0.07	0.260841	2.13363e-06	0.0487705
	PIM3	CD4.2	0.275	0.164	0.259335	3.50171e-07	0.0080042
	NOP53	CD4.2	0.79	0.681	0.25775	3.65014e-08	0.000834349
	FHIT	CD4.2	0.162	0.077	0.257049	6.18577e-12	1.41394e-07
	CHMP7	CD4.2	0.207	0.108	0.255207	1.92104e-07	0.00439111
	RPS9	CD4.2	0.973	0.946	0.254303	7.64437e-17	1.74735e-12
	FTH1	CD4.2	0.954	0.914	0.25401	3.51429e-20	8.03296e-16
	TBC1D4	CD4.2	0.115	0.045	0.253373	5.87365e-09	0.00013426
	BTG2	CD4.2	0.453	0.323	0.253041	1.84166e-06	0.0420966
	EPHX2	CD4.2	0.18	0.081	0.251097	9.0661e-07	0.0207233
	GPX4	CD4.2	0.634	0.493	0.250365	1.01915e-07	0.00232958
	TNFRSF25	CD4.2	0.185	0.094	0.250294	2.63681e-08	0.000602722
	COTL1	CD4.3	0.862	0.403	1.33344	2.1482e-123	4.91035e-119
	CRIP1	CD4.3	0.887	0.65	1.30652	1.9988e-92	4.56885e-88
	LGALS1	CD4.3	0.619	0.308	1.13867	4.50346e-54	1.0294e-49
	ITGB1	CD4.3	0.808	0.387	1.0676	4.23298e-80	9.67574e-76
	S100A11	CD4.3	0.789	0.437	0.992041	1.9242e-61	4.39833e-57
	PLP2	CD4.3	0.696	0.336	0.991935	4.42454e-61	1.01136e-56
	VIM	CD4.3	0.97	0.828	0.982562	2.5917e-94	5.92411e-90
	S100A10	CD4.3	0.941	0.74	0.951459	5.88246e-76	1.34461e-71
	LTB	CD4.3	0.91	0.57	0.945112	3.35738e-58	7.6743e-54
	GSTK1	CD4.3	0.884	0.624	0.88576	7.35929e-73	1.68219e-68
	CD82	CD4.3	0.461	0.114	0.88569	5.16196e-63	1.17992e-58
	CAPG	CD4.3	0.353	0.06	0.867494	1.24756e-57	2.85167e-53
	ANXA2	CD4.3	0.677	0.339	0.83633	1.0577e-64	2.41768e-60
	LGALS3	CD4.3	0.243	0.068	0.818898	1.10908e-26	2.53513e-22
	AQP3	CD4.3	0.499	0.22	0.811898	3.89322e-33	8.89912e-29
	CRIP2	CD4.3	0.287	0.061	0.804576	2.17811e-40	4.97873e-36
	CORO1B	CD4.3	0.554	0.256	0.791018	3.09336e-43	7.0708e-39
	ACTG1	CD4.3	0.971	0.903	0.749532	2.22842e-35	5.09373e-31
	NPDC1	CD4.3	0.336	0.09	0.749135	4.68236e-37	1.07029e-32
	ANXA5	CD4.3	0.583	0.257	0.735937	9.61193e-59	2.1971e-54
	S100A4	CD4.3	0.969	0.853	0.73542	1.8037e-56	4.1229e-52
	TAGLN2	CD4.3	0.86	0.629	0.733336	1.65091e-50	3.77364e-46
	LMNA	CD4.3	0.231	0.027	0.728822	5.90101e-42	1.34885e-37
	CD52	CD4.3	0.98	0.874	0.714335	5.35727e-74	1.22456e-69
	CCR10	CD4.3	0.154	0.007	0.711387	1.31007e-34	2.99457e-30
	SLC2A3	CD4.3	0.585	0.301	0.687217	6.12744e-41	1.40061e-36
	PI16	CD4.3	0.244	0.033	0.683859	3.00536e-38	6.86966e-34
	RGCC	CD4.3	0.365	0.156	0.680179	1.31338e-24	3.00213e-20
	TRADD	CD4.3	0.533	0.239	0.678691	2.15905e-38	4.93516e-34
	LIME1	CD4.3	0.789	0.555	0.668709	6.35565e-37	1.45277e-32
	GAPDH	CD4.3	0.958	0.855	0.66671	1.8318e-50	4.18712e-46
	CNN2	CD4.3	0.764	0.528	0.661625	7.26514e-32	1.66067e-27
	GATA3	CD4.3	0.473	0.225	0.651866	1.66914e-29	3.81533e-25
	ARPC1B	CD4.3	0.809	0.612	0.649025	1.46708e-34	3.35345e-30
	FXYD5	CD4.3	0.938	0.801	0.646966	1.00645e-50	2.30053e-46
	FUT7	CD4.3	0.204	0.019	0.6399	1.12228e-40	2.56531e-36
	S100A6	CD4.3	0.953	0.84	0.628966	5.69289e-52	1.30128e-47
	TIMP1	CD4.3	0.44	0.197	0.623155	3.77243e-24	8.62301e-20
	TMSB10	CD4.3	1	0.988	0.616698	1.44692e-92	3.30738e-88
	LIMS1	CD4.3	0.317	0.122	0.60927	4.63062e-21	1.05847e-16
	TNFSF10	CD4.3	0.306	0.094	0.59832	1.53178e-26	3.50134e-22
	RNASET2	CD4.3	0.633	0.368	0.585921	3.13263e-34	7.16057e-30
	WDR86-AS1	CD4.3	0.237	0.041	0.578816	7.44252e-35	1.70121e-30
	AIRE	CD4.3	0.126	0.003	0.576367	1.90244e-29	4.34859e-25
	PLSCR3	CD4.3	0.552	0.293	0.575221	5.03687e-30	1.15133e-25
	NOSIP	CD4.3	0.698	0.463	0.569978	9.68461e-20	2.21371e-15
	LINC00892	CD4.3	0.21	0.028	0.557912	2.27966e-36	5.21084e-32
	PRDX1	CD4.3	0.625	0.344	0.555157	4.33924e-30	9.91863e-26
	PKM	CD4.3	0.691	0.447	0.551322	6.52507e-25	1.4915e-20
	TXN	CD4.3	0.577	0.321	0.549684	7.9768e-27	1.82334e-22
	JUNB	CD4.3	0.872	0.759	0.540023	1.22818e-18	2.80737e-14
	ITM2A	CD4.3	0.561	0.324	0.536468	2.79039e-22	6.37827e-18
	LDHB	CD4.3	0.932	0.712	0.51437	1.04586e-32	2.39062e-28
	FYB1	CD4.3	0.838	0.649	0.511603	6.52569e-24	1.49164e-19
	SOCS3	CD4.3	0.399	0.199	0.507831	1.85659e-17	4.24378e-13
	CCR4	CD4.3	0.186	0.026	0.497772	3.03214e-33	6.93087e-29
	IL32	CD4.3	0.972	0.897	0.497043	3.88473e-30	8.87971e-26
	PLEC	CD4.3	0.288	0.104	0.495205	1.05548e-29	2.41262e-25
	ZYX	CD4.3	0.622	0.399	0.493214	1.55048e-23	3.5441e-19
	CDC25B	CD4.3	0.534	0.309	0.489004	4.68744e-26	1.07146e-21
	CCDC167	CD4.3	0.368	0.148	0.488255	1.8923e-22	4.32543e-18
	ATP2B1	CD4.3	0.338	0.142	0.486349	1.93633e-17	4.42607e-13
	DUSP4	CD4.3	0.154	0.02	0.486076	3.38191e-30	7.73037e-26
	ARID5B	CD4.3	0.441	0.206	0.485881	9.04276e-24	2.06699e-19
	UBXN11	CD4.3	0.251	0.091	0.484679	2.66516e-19	6.09202e-15
	PASK	CD4.3	0.288	0.133	0.483357	1.13244e-16	2.58852e-12
	FLT3LG	CD4.3	0.638	0.396	0.483205	8.51435e-24	1.94621e-19
	TNFRSF4	CD4.3	0.195	0.044	0.480588	1.2209e-17	2.79074e-13
	PIM3	CD4.3	0.366	0.161	0.472301	1.97771e-25	4.52065e-21
	ALOX5AP	CD4.3	0.601	0.347	0.471115	3.27032e-22	7.47529e-18
	PFKL	CD4.3	0.36	0.148	0.467267	1.05822e-31	2.41888e-27
	FTH1	CD4.3	0.976	0.913	0.466982	3.40434e-34	7.78164e-30
	MAL	CD4.3	0.448	0.239	0.466162	2.33582e-18	5.33921e-14
	SEPTIN9	CD4.3	0.646	0.434	0.464869	4.53234e-21	1.036e-16
	TSPO	CD4.3	0.683	0.444	0.463292	2.42798e-18	5.54989e-14
	AHNAK	CD4.3	0.77	0.541	0.463041	1.09269e-24	2.49766e-20
	RNF214	CD4.3	0.268	0.088	0.462675	9.98607e-23	2.28262e-18
	S1PR4	CD4.3	0.489	0.296	0.460302	1.14999e-17	2.62864e-13
	UCP2	CD4.3	0.728	0.557	0.460239	1.84437e-18	4.21585e-14
	ADSL	CD4.3	0.376	0.168	0.458035	1.54488e-21	3.53128e-17
	ANXA1	CD4.3	0.816	0.638	0.447613	1.38135e-20	3.15748e-16
	CAPZB	CD4.3	0.781	0.59	0.442922	1.37234e-19	3.1369e-15
	GPR183	CD4.3	0.314	0.146	0.441161	4.0873e-15	9.34276e-11
	NME2	CD4.3	0.762	0.58	0.440475	3.5085e-17	8.01974e-13
	RILPL2	CD4.3	0.312	0.118	0.439547	9.43182e-20	2.15593e-15
	CXCR3	CD4.3	0.245	0.109	0.43935	1.44798e-17	3.30979e-13
	STAT1	CD4.3	0.367	0.199	0.438137	6.77731e-16	1.54916e-11
	CD27	CD4.3	0.527	0.355	0.435757	1.05248e-11	2.40576e-07
	HLA-DRA	CD4.3	0.216	0.088	0.434809	5.79329e-16	1.32423e-11
	ARHGAP15	CD4.3	0.648	0.415	0.43458	1.07869e-20	2.46566e-16
	PBXIP1	CD4.3	0.488	0.273	0.433245	4.46322e-16	1.0202e-11
	LAT	CD4.3	0.695	0.486	0.433089	6.98745e-20	1.59719e-15
	LRRFIP1	CD4.3	0.677	0.433	0.427902	2.85797e-28	6.53275e-24
	PAG1	CD4.3	0.364	0.16	0.424119	2.55859e-21	5.84843e-17
	CD28	CD4.3	0.268	0.098	0.420948	1.0941e-20	2.5009e-16
	JPT1	CD4.3	0.414	0.198	0.420296	4.17202e-19	9.53639e-15
	GLIPR1	CD4.3	0.465	0.256	0.418922	5.51378e-14	1.26034e-09
	SLC25A5	CD4.3	0.641	0.458	0.417674	4.16069e-14	9.5105e-10
	CLDND1	CD4.3	0.458	0.26	0.415066	9.86844e-19	2.25573e-14
	R3HDM4	CD4.3	0.461	0.253	0.410588	2.48871e-15	5.6887e-11
	RCAN3	CD4.3	0.447	0.227	0.410148	4.32648e-15	9.88947e-11
	LEF1	CD4.3	0.533	0.292	0.409062	1.4292e-16	3.26686e-12
	NDUFB9	CD4.3	0.695	0.48	0.404308	2.80134e-19	6.4033e-15
	TLE5	CD4.3	0.787	0.657	0.404084	2.21743e-11	5.06859e-07
	LDHA	CD4.3	0.715	0.495	0.402417	4.62272e-20	1.05666e-15
	SUSD3	CD4.3	0.249	0.091	0.397615	1.31848e-15	3.01379e-11
	SIT1	CD4.3	0.376	0.186	0.396002	1.16972e-20	2.67375e-16
	EVI2B	CD4.3	0.51	0.297	0.394645	4.93028e-19	1.12696e-14
	EMP3	CD4.3	0.896	0.739	0.392895	9.48333e-24	2.1677e-19
	IL6R	CD4.3	0.205	0.06	0.392224	2.77637e-21	6.34623e-17
	TOB1	CD4.3	0.355	0.204	0.391849	7.63779e-12	1.74585e-07
	OPTN	CD4.3	0.521	0.297	0.389983	1.51817e-28	3.47024e-24
	SPTAN1	CD4.3	0.467	0.263	0.389575	3.31146e-21	7.56934e-17
	ISG20	CD4.3	0.668	0.465	0.389475	5.2021e-16	1.1891e-11
	NIBAN1	CD4.3	0.247	0.089	0.386621	4.31599e-19	9.86549e-15
	LGALS9	CD4.3	0.19	0.046	0.384145	4.56383e-27	1.0432e-22
	EEF2	CD4.3	0.943	0.836	0.382586	4.44347e-21	1.01569e-16
	MAP3K1	CD4.3	0.24	0.085	0.382123	3.20005e-19	7.31466e-15
	SAT1	CD4.3	0.548	0.36	0.380355	4.20104e-15	9.60275e-11
	CYLD	CD4.3	0.502	0.288	0.378744	3.31691e-13	7.5818e-09
	TESPA1	CD4.3	0.348	0.173	0.377072	3.81611e-16	8.72286e-12
	TCF7	CD4.3	0.619	0.422	0.37533	1.20033e-12	2.74371e-08
	ELOVL5	CD4.3	0.375	0.182	0.373463	6.1109e-22	1.39683e-17
	HLA-DRB5	CD4.3	0.25	0.12	0.372949	9.13267e-19	2.08755e-14
	CD40LG	CD4.3	0.218	0.073	0.372684	3.02994e-13	6.92583e-09
	TNFRSF25	CD4.3	0.245	0.092	0.369991	1.02041e-19	2.33245e-15
	FAS	CD4.3	0.27	0.105	0.369886	2.77e-27	6.33166e-23
	CSTB	CD4.3	0.629	0.424	0.369351	6.59415e-13	1.50729e-08
	CD5	CD4.3	0.405	0.236	0.367195	4.97868e-13	1.13803e-08
	SAMHD1	CD4.3	0.65	0.447	0.36395	3.39101e-19	7.75116e-15
	CYTOR	CD4.3	0.369	0.193	0.360467	4.2449e-14	9.703e-10
	TPM4	CD4.3	0.343	0.156	0.360064	3.47488e-12	7.94289e-08
	MYH9	CD4.3	0.71	0.52	0.359014	5.1873e-17	1.18571e-12
	DGKA	CD4.3	0.391	0.214	0.352594	3.24348e-14	7.41396e-10
	C4orf48	CD4.3	0.393	0.202	0.352474	3.95548e-24	9.04144e-20
	CDCA7	CD4.3	0.125	0.016	0.352251	1.94425e-18	4.44416e-14
	CD4	CD4.3	0.213	0.089	0.351537	9.78515e-14	2.23669e-09
	PIM2	CD4.3	0.411	0.235	0.350139	9.47249e-10	2.16522e-05
	FAM102A	CD4.3	0.27	0.118	0.349682	4.70824e-13	1.07621e-08
	CD44	CD4.3	0.702	0.487	0.34876	1.61462e-15	3.69071e-11
	LPAR6	CD4.3	0.215	0.084	0.345994	4.12112e-14	9.42005e-10
	ARMH1	CD4.3	0.255	0.12	0.345374	1.27428e-13	2.91275e-09
	DYNLL1	CD4.3	0.456	0.268	0.342061	1.33225e-23	3.04525e-19
	HINT1	CD4.3	0.945	0.827	0.341806	1.29381e-20	2.9574e-16
	BIRC3	CD4.3	0.289	0.142	0.341153	1.10188e-14	2.51869e-10
	ACTB	CD4.3	0.997	0.989	0.34104	2.63425e-24	6.02136e-20
	TRIB2	CD4.3	0.207	0.077	0.340279	3.96017e-17	9.05215e-13
	SLF1	CD4.3	0.219	0.083	0.33977	1.34157e-15	3.06655e-11
	SH3BGRL3	CD4.3	0.978	0.918	0.339467	1.65096e-32	3.77377e-28
	IATPR	CD4.3	0.131	0.024	0.338723	6.85162e-17	1.56614e-12
	TMSB4X	CD4.3	0.998	0.997	0.338635	1.41495e-33	3.23429e-29
	TUBA4A	CD4.3	0.504	0.3	0.336944	1.50608e-18	3.44261e-14
	TMEM123	CD4.3	0.634	0.404	0.336878	9.98028e-18	2.28129e-13
	MCUB	CD4.3	0.584	0.382	0.336355	1.51725e-10	3.46813e-06
	PPP1CC	CD4.3	0.506	0.314	0.335191	5.3006e-11	1.21161e-06
	PTGER4	CD4.3	0.334	0.176	0.335094	2.24326e-11	5.12764e-07
	MVP	CD4.3	0.397	0.217	0.331728	2.11261e-14	4.82901e-10
	HSPA8	CD4.3	0.927	0.819	0.330473	1.69219e-11	3.86801e-07
	ZFP36L2	CD4.3	0.918	0.837	0.330105	7.54275e-07	0.0172412
	TALDO1	CD4.3	0.452	0.255	0.32965	2.68525e-17	6.13795e-13
	SFXN1	CD4.3	0.403	0.221	0.327623	3.65415e-18	8.35265e-14
	SH3BP5	CD4.3	0.417	0.231	0.326487	2.0694e-16	4.73024e-12
	EZR	CD4.3	0.618	0.399	0.325891	8.11699e-12	1.85538e-07
	MPRIP	CD4.3	0.229	0.087	0.324568	2.85612e-12	6.52853e-08
	LIMD2	CD4.3	0.823	0.705	0.324483	1.98548e-08	0.000453842
	EIF3A	CD4.3	0.495	0.295	0.323699	6.48654e-23	1.48269e-18
	NAP1L1	CD4.3	0.655	0.456	0.322359	1.05433e-11	2.40999e-07
	TTC39C	CD4.3	0.468	0.275	0.321968	1.70697e-16	3.9018e-12
	ALDOA	CD4.3	0.658	0.462	0.321536	2.34883e-18	5.36895e-14
	CTSB	CD4.3	0.254	0.106	0.320564	3.10185e-11	7.09022e-07
	TTC39C-AS1	CD4.3	0.122	0.027	0.320231	1.40685e-16	3.21578e-12
	ADAM19	CD4.3	0.128	0.019	0.320022	9.87461e-21	2.25714e-16
	INPP4B	CD4.3	0.434	0.246	0.319224	1.47326e-11	3.36758e-07
	MFHAS1	CD4.3	0.189	0.063	0.319173	4.31078e-22	9.85357e-18
	HLA-DQB1	CD4.3	0.214	0.079	0.318144	7.49271e-18	1.71268e-13
	TKT	CD4.3	0.432	0.248	0.317388	4.96326e-15	1.1345e-10
	BLVRA	CD4.3	0.219	0.078	0.316818	2.77181e-24	6.3358e-20
	LY96	CD4.3	0.109	0.023	0.314836	1.02907e-12	2.35225e-08
	GMFG	CD4.3	0.82	0.667	0.314436	7.51285e-10	1.71729e-05
	EVL	CD4.3	0.847	0.686	0.314041	6.41107e-15	1.46544e-10
	YBX1	CD4.3	0.881	0.741	0.311634	7.89188e-18	1.80393e-13
	VSIR	CD4.3	0.54	0.351	0.309528	1.70725e-14	3.90244e-10
	NR3C1	CD4.3	0.47	0.282	0.307324	1.06756e-13	2.44023e-09
	PFN1	CD4.3	0.985	0.944	0.307122	2.77771e-18	6.3493e-14
	EEPD1	CD4.3	0.123	0.019	0.30703	2.45517e-21	5.61203e-17
	ETFB	CD4.3	0.362	0.192	0.306703	1.61805e-11	3.69853e-07
	RGS1	CD4.3	0.143	0.055	0.304252	2.73524e-14	6.25221e-10
	AHR	CD4.3	0.169	0.056	0.30368	9.77404e-20	2.23415e-15
	SPOCK2	CD4.3	0.663	0.473	0.303623	3.06524e-14	7.00651e-10
	LINC00426	CD4.3	0.153	0.041	0.30361	6.80965e-16	1.55655e-11
	TYMP	CD4.3	0.179	0.062	0.303425	2.29878e-11	5.25456e-07
	OGDH	CD4.3	0.262	0.111	0.301789	1.12414e-22	2.56955e-18
	NEAT1	CD4.3	0.505	0.336	0.301186	1.78921e-13	4.08978e-09
	PVT1	CD4.3	0.18	0.066	0.300611	1.41761e-19	3.24037e-15
	TRAT1	CD4.3	0.378	0.199	0.300502	2.62426e-07	0.00599854
	PPM1G	CD4.3	0.443	0.261	0.300404	2.34012e-14	5.34905e-10
	TIAM1	CD4.3	0.15	0.041	0.299201	1.99818e-16	4.56745e-12
	ISG15	CD4.3	0.315	0.185	0.297526	1.49208e-12	3.4106e-08
	CTSA	CD4.3	0.31	0.173	0.296979	1.25885e-09	2.87747e-05
	C1orf162	CD4.3	0.403	0.224	0.296002	1.59374e-15	3.64296e-11
	SMC4	CD4.3	0.179	0.064	0.29529	2.75315e-17	6.29315e-13
	ARPC3	CD4.3	0.871	0.725	0.292179	9.23397e-14	2.1107e-09
	FXYD1	CD4.3	0.138	0.043	0.291865	3.6031e-15	8.23596e-11
	NDUFA13	CD4.3	0.68	0.498	0.291387	1.31522e-10	3.00632e-06
	PELI1	CD4.3	0.199	0.087	0.291158	8.14079e-14	1.86082e-09
	SHMT2	CD4.3	0.24	0.108	0.29103	7.95894e-12	1.81925e-07
	MZT2A	CD4.3	0.495	0.317	0.29101	8.061e-14	1.84258e-09
	CITED2	CD4.3	0.482	0.321	0.290539	7.75546e-10	1.77274e-05
	HNRNPLL	CD4.3	0.247	0.105	0.290143	7.20052e-18	1.64589e-13
	AL133415.1	CD4.3	0.217	0.098	0.289773	3.68983e-15	8.43421e-11
	SYNGR2	CD4.3	0.433	0.257	0.289742	9.12918e-09	0.000208675
	TTN	CD4.3	0.135	0.056	0.289197	4.41552e-08	0.0010093
	BIN1	CD4.3	0.58	0.408	0.288231	6.25064e-12	1.42877e-07
	ATP5PD	CD4.3	0.6	0.403	0.286489	3.65756e-13	8.36045e-09
	USP46	CD4.3	0.147	0.041	0.284853	5.35013e-17	1.22293e-12
	ABRACL	CD4.3	0.57	0.384	0.28369	1.07629e-10	2.46018e-06
	COX5A	CD4.3	0.591	0.4	0.283668	1.3974e-11	3.19419e-07
	OCIAD2	CD4.3	0.509	0.334	0.283218	4.91656e-08	0.00112383
	IL2RG	CD4.3	0.787	0.633	0.282615	3.3172e-13	7.58246e-09
[truncated: 2,468 more rows]

## Sheet: Table S5 - CD8 cluster DEGs
Table S5: Differentially expressed genes for CD8 T cell subset
	Gene	Cluster	pct.1	pct.2	avg_log2FC	p_val	p_val_adj
	CMC1	CD8.01	0.674	0.377	1.01779	0	0
	SEPT7	CD8.01	0.199	0.081	0.828476	7.03992e-221	1.60918e-216
	CCL4	CD8.01	0.592	0.35	0.78203	0	0
	RARRES3	CD8.01	0.193	0.083	0.759179	9.35467e-190	2.13829e-185
	KLRD1	CD8.01	0.615	0.385	0.740477	0	0
	GNLY	CD8.01	0.832	0.469	0.721445	0	0
	KLRB1	CD8.01	0.339	0.218	0.684598	3.03741e-132	6.94291e-128
	GZMA	CD8.01	0.926	0.664	0.664257	0	0
	KLRG1	CD8.01	0.597	0.401	0.640166	8.0228e-299	1.83385e-294
	GZMH	CD8.01	0.891	0.509	0.609738	0	0
	AES	CD8.01	0.17	0.083	0.605344	4.25192e-125	9.71904e-121
	NKG7	CD8.01	0.995	0.751	0.584379	0	0
	KLRF1	CD8.01	0.238	0.126	0.540364	6.64614e-151	1.51917e-146
	C12orf75	CD8.01	0.593	0.454	0.473401	1.73799e-158	3.97271e-154
	HOPX	CD8.01	0.468	0.314	0.463135	3.14165e-158	7.18119e-154
	KIAA1551	CD8.01	0.105	0.051	0.439095	2.73738e-76	6.25711e-72
	TRGV10	CD8.01	0.177	0.121	0.401707	1.48794e-45	3.40113e-41
	AOAH	CD8.01	0.338	0.241	0.400263	8.22263e-85	1.87953e-80
	PLEK	CD8.01	0.551	0.415	0.396812	5.72267e-117	1.30809e-112
	SRGN	CD8.01	0.817	0.715	0.38137	8.50388e-174	1.94382e-169
	CCL5	CD8.01	0.988	0.795	0.377205	6.52376e-269	1.4912e-264
	CTSC	CD8.01	0.582	0.471	0.37548	3.71224e-110	8.48543e-106
	SH2D1A	CD8.01	0.304	0.235	0.372871	9.59242e-53	2.19263e-48
	ALOX5AP	CD8.01	0.368	0.317	0.367345	1.30363e-37	2.97984e-33
	GPR65	CD8.01	0.301	0.233	0.365985	2.70165e-53	6.17543e-49
	XCL2	CD8.01	0.203	0.116	0.355676	9.54447e-98	2.18168e-93
	HLA-DRB1	CD8.01	0.468	0.352	0.351279	4.40198e-92	1.0062e-87
	CST7	CD8.01	0.921	0.713	0.348368	1.95391e-212	4.46626e-208
	S100A4	CD8.01	0.966	0.897	0.344844	6.97578e-252	1.59452e-247
	CCL4L2	CD8.01	0.161	0.091	0.331181	3.94026e-78	9.00666e-74
	SAMD3	CD8.01	0.432	0.358	0.328804	6.89131e-52	1.57522e-47
	GNG2	CD8.01	0.463	0.397	0.317974	2.45337e-50	5.60792e-46
	CD160	CD8.01	0.128	0.072	0.312951	1.28114e-63	2.92844e-59
	CLIC1	CD8.01	0.8	0.707	0.304903	2.18329e-131	4.99056e-127
	TGFBR3	CD8.01	0.31	0.245	0.300787	1.93784e-38	4.42951e-34
	ANXA1	CD8.01	0.756	0.683	0.299704	9.01665e-83	2.06103e-78
	FCRL6	CD8.01	0.369	0.271	0.294799	4.68868e-68	1.07174e-63
	APMAP	CD8.01	0.478	0.398	0.283369	5.86701e-59	1.34108e-54
	EOMES	CD8.01	0.206	0.146	0.281682	6.8167e-45	1.55816e-40
	HLA-DPA1	CD8.01	0.595	0.496	0.280664	1.31904e-76	3.01506e-72
	HLA-DPB1	CD8.01	0.615	0.545	0.275276	1.3514e-64	3.08904e-60
	CD63	CD8.01	0.451	0.382	0.275125	3.00588e-48	6.87083e-44
	RHOC	CD8.01	0.332	0.248	0.273376	3.11874e-59	7.12881e-55
	SYNE1	CD8.01	0.437	0.378	0.271858	8.68911e-39	1.98616e-34
	C1orf21	CD8.01	0.277	0.203	0.271151	5.45012e-49	1.24579e-44
	ARPC5L	CD8.01	0.474	0.419	0.270822	1.41916e-40	3.24392e-36
	PTMS	CD8.01	0.188	0.129	0.265753	4.644e-45	1.06152e-40
	MYBL1	CD8.01	0.298	0.236	0.263547	1.24638e-35	2.84896e-31
	CYTOR	CD8.01	0.331	0.26	0.261237	2.59606e-43	5.93406e-39
	MAP3K8	CD8.01	0.222	0.162	0.260398	5.63002e-41	1.28691e-36
	MATK	CD8.01	0.436	0.363	0.259136	1.94008e-47	4.43463e-43
	S100A11	CD8.01	0.513	0.451	0.258198	3.49957e-41	7.99932e-37
	AHNAK	CD8.01	0.659	0.596	0.256262	7.38907e-49	1.68899e-44
	ZEB2	CD8.01	0.392	0.304	0.253406	3.44692e-51	7.87897e-47
	ZNF683	CD8.02	0.448	0.061	1.77812	0	0
	FGFBP2	CD8.02	0.921	0.332	1.68602	0	0
	MTRNR2L8	CD8.02	0.341	0.162	1.42457	4.76523e-292	1.08924e-287
	GZMB	CD8.02	0.875	0.346	1.39202	0	0
	GZMH	CD8.02	0.974	0.508	1.28705	0	0
	PRSS23	CD8.02	0.548	0.146	1.27272	0	0
	ITGB1	CD8.02	0.752	0.357	1.25852	0	0
	SPON2	CD8.02	0.577	0.215	1.24138	0	0
	PRF1	CD8.02	0.89	0.488	1.15559	0	0
	GNLY	CD8.02	0.985	0.452	1.1504	0	0
	ADGRG1	CD8.02	0.595	0.208	1.12335	0	0
	EFHD2	CD8.02	0.812	0.446	1.07724	0	0
	LGALS1	CD8.02	0.666	0.344	1.06486	0	0
	NKG7	CD8.02	0.999	0.761	0.968136	0	0
	ASCL2	CD8.02	0.372	0.093	0.953739	0	0
	CX3CR1	CD8.02	0.485	0.192	0.89082	0	0
	ZEB2	CD8.02	0.568	0.271	0.83671	0	0
	FCGR3A	CD8.02	0.48	0.206	0.799626	0	0
	TBX21	CD8.02	0.494	0.23	0.796104	0	0
	S100A4	CD8.02	0.991	0.895	0.779018	0	0
	KLRD1	CD8.02	0.688	0.38	0.711701	0	0
	CST7	CD8.02	0.966	0.713	0.680003	0	0
	PLEK	CD8.02	0.657	0.398	0.655879	0	0
	FLNA	CD8.02	0.739	0.557	0.64266	0	0
	FCRL6	CD8.02	0.477	0.252	0.637229	0	0
	PROK2	CD8.02	0.171	0.019	0.635798	0	0
	ITGB2	CD8.02	0.89	0.736	0.62924	0	0
	RAP1B	CD8.02	0.802	0.655	0.609029	0	0
	CTSC	CD8.02	0.669	0.458	0.605375	0	0
	ABHD17A	CD8.02	0.668	0.478	0.603417	2.63876e-293	6.03168e-289
	SLC9A3R1	CD8.02	0.746	0.563	0.601213	0	0
	TGFBR3	CD8.02	0.423	0.224	0.60034	8.39927e-288	1.91991e-283
	CD52	CD8.02	0.969	0.912	0.596299	0	0
	DSTN	CD8.02	0.515	0.335	0.595998	8.1191e-255	1.85586e-250
	LAIR2	CD8.02	0.221	0.097	0.589882	9.5209e-193	2.17629e-188
	S1PR5	CD8.02	0.383	0.189	0.581917	1.68158e-285	3.84375e-281
	TGFB1	CD8.02	0.764	0.602	0.580036	4.29216e-298	9.81103e-294
	SSBP4	CD8.02	0.557	0.384	0.573974	1.39005e-247	3.17739e-243
	TTC38	CD8.02	0.307	0.14	0.561251	6.1549e-256	1.40689e-251
	YWHAQ	CD8.02	0.622	0.455	0.557456	5.25707e-250	1.20166e-245
	TNFRSF1B	CD8.02	0.37	0.206	0.550744	1.3677e-224	3.12628e-220
	C1orf21	CD8.02	0.364	0.188	0.547869	5.82656e-246	1.33183e-241
	C12orf75	CD8.02	0.649	0.448	0.541635	1.15613e-265	2.64269e-261
	SYNGR1	CD8.02	0.201	0.077	0.540599	1.83145e-231	4.18633e-227
	VCL	CD8.02	0.253	0.106	0.540332	2.69408e-253	6.15813e-249
	CD99	CD8.02	0.913	0.797	0.532127	0	0
	APOBEC3G	CD8.02	0.493	0.316	0.529076	2.27725e-219	5.20534e-215
	LSP1	CD8.02	0.877	0.794	0.527232	0	0
	SSBP3	CD8.02	0.275	0.131	0.520357	6.82127e-221	1.55921e-216
	CD8A	CD8.02	0.854	0.797	0.501624	2.16568e-286	4.95032e-282
	CRIP1	CD8.02	0.823	0.702	0.50162	4.34214e-263	9.92525e-259
	SPN	CD8.02	0.471	0.326	0.498326	3.9697e-163	9.07395e-159
	CD3G	CD8.02	0.813	0.7	0.494604	6.73336e-269	1.53911e-264
	KLRB1	CD8.02	0.35	0.222	0.49434	2.45226e-115	5.60537e-111
	CHST12	CD8.02	0.374	0.229	0.4915	5.49909e-172	1.25698e-167
	MYBL1	CD8.02	0.367	0.223	0.488215	8.52444e-164	1.94852e-159
	ADRB2	CD8.02	0.273	0.134	0.481791	5.03919e-195	1.15186e-190
	MYO1F	CD8.02	0.434	0.281	0.481043	5.49841e-176	1.25683e-171
	AHNAK	CD8.02	0.738	0.582	0.480686	2.31602e-205	5.29395e-201
	MXRA7	CD8.02	0.26	0.129	0.479286	3.37128e-184	7.70607e-180
	CTSD	CD8.02	0.494	0.362	0.479189	3.98754e-161	9.11471e-157
	BHLHE40	CD8.02	0.308	0.172	0.477987	6.53036e-168	1.49271e-163
	MTSS1	CD8.02	0.225	0.095	0.474953	5.22977e-214	1.19542e-209
	ITGAM	CD8.02	0.195	0.073	0.466812	3.45405e-222	7.89526e-218
	CD320	CD8.02	0.307	0.188	0.465	4.73736e-134	1.08287e-129
	TPST2	CD8.02	0.505	0.36	0.464909	8.76139e-160	2.00268e-155
	SELPLG	CD8.02	0.579	0.446	0.461932	1.19528e-167	2.73217e-163
	CLIC1	CD8.02	0.847	0.702	0.461839	8.26011e-253	1.8881e-248
	ABI3	CD8.02	0.336	0.196	0.461088	8.6339e-166	1.97354e-161
	ARPC2	CD8.02	0.915	0.841	0.459658	0	0
	TLE5	CD8.02	0.799	0.738	0.456511	1.18148e-179	2.70064e-175
	LITAF	CD8.02	0.817	0.695	0.455943	6.50458e-238	1.48682e-233
	CES1	CD8.02	0.132	0.028	0.451532	2.70658e-300	6.18671e-296
	FGR	CD8.02	0.308	0.165	0.449924	2.25839e-176	5.16223e-172
	PLEKHF1	CD8.02	0.239	0.114	0.449494	4.19995e-178	9.60025e-174
	ANXA1	CD8.02	0.829	0.67	0.448313	4.34383e-248	9.92914e-244
	GNAI2	CD8.02	0.682	0.554	0.448217	5.68741e-175	1.30003e-170
	KLRC4	CD8.02	0.375	0.265	0.447196	7.49066e-108	1.71221e-103
	RASSF1	CD8.02	0.469	0.327	0.446575	2.15531e-152	4.9266e-148
	CYBA	CD8.02	0.947	0.885	0.439501	0	0
	CALR	CD8.02	0.665	0.584	0.438541	1.74349e-116	3.98528e-112
	CD81	CD8.02	0.657	0.507	0.43581	2.49174e-170	5.69562e-166
	HOPX	CD8.02	0.447	0.326	0.431285	1.38634e-99	3.16889e-95
	RAP2A	CD8.02	0.194	0.083	0.430728	1.39157e-177	3.18086e-173
	CLIC3	CD8.02	0.294	0.172	0.430192	1.64956e-129	3.77057e-125
	CTSW	CD8.02	0.882	0.797	0.425299	6.95337e-225	1.5894e-220
	LY6E	CD8.02	0.742	0.654	0.423587	1.85005e-152	4.22885e-148
	DYNLL1	CD8.02	0.389	0.283	0.423061	9.2491e-100	2.11416e-95
	UCP2	CD8.02	0.697	0.596	0.422768	1.39672e-143	3.19263e-139
	LILRB1	CD8.02	0.183	0.069	0.42154	1.47088e-199	3.36213e-195
	EMP3	CD8.02	0.894	0.805	0.421045	4.68747e-248	1.07146e-243
	ARL4C	CD8.02	0.773	0.646	0.419572	1.87897e-179	4.29496e-175
	CD247	CD8.02	0.58	0.457	0.417141	1.82215e-143	4.16508e-139
	BIN2	CD8.02	0.686	0.582	0.416609	1.49547e-153	3.41834e-149
	IL2RG	CD8.02	0.786	0.712	0.411413	4.03133e-165	9.21481e-161
	MSN	CD8.02	0.638	0.529	0.410875	2.14684e-135	4.90724e-131
	DOK2	CD8.02	0.447	0.318	0.407437	1.91694e-124	4.38175e-120
	HLA-DPB1	CD8.02	0.683	0.533	0.405128	3.07917e-166	7.03836e-162
	GPR141	CD8.02	0.141	0.042	0.40467	5.48326e-219	1.25336e-214
	GNPTAB	CD8.02	0.271	0.165	0.402886	7.31597e-112	1.67228e-107
	ATP2B4	CD8.02	0.315	0.202	0.402497	6.17465e-113	1.4114e-108
	MATK	CD8.02	0.492	0.354	0.402392	3.57459e-132	8.1708e-128
	SYNE1	CD8.02	0.494	0.368	0.401895	6.40916e-119	1.46501e-114
	PTMS	CD8.02	0.224	0.124	0.40134	1.87366e-112	4.28282e-108
	CD226	CD8.02	0.171	0.075	0.394985	1.352e-145	3.09041e-141
	PXN	CD8.02	0.334	0.224	0.394395	4.02877e-107	9.20897e-103
	CDK2AP2	CD8.02	0.395	0.284	0.39379	1.58793e-98	3.62968e-94
	LINC02384	CD8.02	0.139	0.044	0.393138	1.84023e-202	4.20639e-198
	PPP1CA	CD8.02	0.747	0.64	0.393068	6.98389e-166	1.59638e-161
	BATF	CD8.02	0.258	0.156	0.391866	1.30202e-108	2.97616e-104
	S100A11	CD8.02	0.567	0.442	0.390972	1.0895e-116	2.49038e-112
	MYO1G	CD8.02	0.48	0.368	0.389377	4.74798e-108	1.08529e-103
	CAPNS1	CD8.02	0.434	0.327	0.389145	1.10787e-101	2.53237e-97
	PTPN18	CD8.02	0.273	0.17	0.383687	4.65019e-105	1.06294e-100
	ARL6IP5	CD8.02	0.778	0.68	0.382277	2.17165e-163	4.96396e-159
	APMAP	CD8.02	0.526	0.391	0.380609	6.83046e-124	1.56131e-119
	CEP78	CD8.02	0.263	0.159	0.379017	7.43195e-106	1.6988e-101
	GLUL	CD8.02	0.206	0.107	0.378208	9.70408e-122	2.21816e-117
	GNG2	CD8.02	0.502	0.392	0.377151	3.21314e-103	7.34459e-99
	ITGB7	CD8.02	0.44	0.34	0.375991	7.73728e-95	1.76859e-90
	ACTN4	CD8.02	0.329	0.223	0.375705	4.24063e-95	9.69322e-91
	IGF2R	CD8.02	0.281	0.179	0.374435	2.91657e-102	6.66671e-98
	CYTOR	CD8.02	0.376	0.253	0.373091	6.3077e-108	1.44181e-103
	DBI	CD8.02	0.606	0.508	0.373008	4.38041e-108	1.00127e-103
	ITGAL	CD8.02	0.389	0.289	0.371779	1.50576e-87	3.44187e-83
	SCP2	CD8.02	0.43	0.333	0.369717	2.34235e-89	5.35415e-85
	OASL	CD8.02	0.165	0.068	0.369401	2.03669e-154	4.65547e-150
	UBE2F	CD8.02	0.27	0.171	0.368932	6.17389e-100	1.41123e-95
	ITGA4	CD8.02	0.621	0.52	0.368235	1.31633e-106	3.00887e-102
	CCL5	CD8.02	0.994	0.802	0.367169	3.42007e-217	7.8176e-213
	SUN2	CD8.02	0.64	0.549	0.36618	1.44889e-109	3.31187e-105
	IQGAP2	CD8.02	0.37	0.279	0.364758	4.65527e-76	1.0641e-71
	ADGRE5	CD8.02	0.476	0.384	0.361702	1.1422e-83	2.61083e-79
	GSTP1	CD8.02	0.672	0.576	0.360946	3.96016e-118	9.05213e-114
	GZMA	CD8.02	0.909	0.68	0.358943	2.92881e-189	6.69468e-185
	OSTF1	CD8.02	0.463	0.358	0.357882	2.73601e-99	6.25398e-95
	KLRC1	CD8.02	0.095	0.036	0.357095	3.47572e-99	7.9448e-95
	TRG-AS1	CD8.02	0.329	0.238	0.356798	1.93205e-74	4.41628e-70
	CD2	CD8.02	0.692	0.597	0.353642	3.48179e-113	7.95868e-109
	PPP1R18	CD8.02	0.537	0.429	0.35317	4.24793e-98	9.70993e-94
	DHRS7	CD8.02	0.553	0.458	0.351857	1.30347e-96	2.97947e-92
	MXD4	CD8.02	0.251	0.157	0.351568	3.52475e-92	8.05687e-88
	ARPC4	CD8.02	0.492	0.403	0.349549	1.05249e-84	2.40579e-80
	YPEL3	CD8.02	0.571	0.479	0.348784	2.76145e-87	6.31212e-83
	CD53	CD8.02	0.631	0.537	0.346387	3.89673e-103	8.90714e-99
	CCDC107	CD8.02	0.376	0.278	0.345883	5.33493e-86	1.21946e-81
	SH2D2A	CD8.02	0.367	0.278	0.343923	2.50445e-69	5.72467e-65
	FBXW5	CD8.02	0.398	0.305	0.343691	1.00759e-80	2.30315e-76
	TLN1	CD8.02	0.51	0.413	0.341962	5.43413e-88	1.24213e-83
	PRR5	CD8.02	0.279	0.19	0.341473	1.19369e-82	2.72855e-78
	CAP1	CD8.02	0.657	0.559	0.341468	2.39802e-109	5.48139e-105
	APLP2	CD8.02	0.189	0.101	0.340263	2.28585e-103	5.22499e-99
	PTP4A2	CD8.02	0.743	0.634	0.339985	6.37279e-133	1.45669e-128
	MTPN	CD8.02	0.403	0.317	0.336591	7.31981e-76	1.67316e-71
	DIP2A	CD8.02	0.249	0.164	0.333993	8.27928e-76	1.89248e-71
	DIAPH1	CD8.02	0.359	0.272	0.333944	5.71559e-71	1.30647e-66
	ARL6IP1	CD8.02	0.565	0.474	0.333891	4.30158e-94	9.83256e-90
	RPS6KA1	CD8.02	0.276	0.19	0.33289	8.99119e-76	2.05521e-71
	BLOC1S1	CD8.02	0.51	0.418	0.332568	6.60403e-84	1.50955e-79
	MBP	CD8.02	0.573	0.473	0.331697	6.7125e-96	1.53434e-91
	ORAI1	CD8.02	0.389	0.297	0.331086	2.76566e-78	6.32174e-74
	TMEM173	CD8.02	0.269	0.187	0.330729	3.31206e-70	7.5707e-66
	CDC42EP3	CD8.02	0.312	0.224	0.329312	3.00412e-72	6.86681e-68
	TNFSF12	CD8.02	0.277	0.19	0.328967	8.71255e-78	1.99151e-73
	ID2	CD8.02	0.468	0.368	0.328592	8.90335e-78	2.03513e-73
	TSPAN2	CD8.02	0.127	0.048	0.328244	2.32691e-137	5.31886e-133
	SYNE2	CD8.02	0.628	0.53	0.327408	1.22023e-93	2.7892e-89
	SRPK2	CD8.02	0.329	0.25	0.325513	2.71307e-61	6.20153e-57
	ZYX	CD8.02	0.526	0.45	0.324477	2.08573e-71	4.76755e-67
	CAST	CD8.02	0.538	0.45	0.324318	9.33633e-78	2.1341e-73
	LLGL2	CD8.02	0.182	0.099	0.322276	4.60311e-95	1.05218e-90
	SRRT	CD8.02	0.298	0.222	0.322176	3.70349e-60	8.46544e-56
	RABAC1	CD8.02	0.565	0.485	0.321755	6.23056e-83	1.42418e-78
	ANXA2	CD8.02	0.526	0.399	0.320045	8.03754e-99	1.83722e-94
	PLEKHG3	CD8.02	0.13	0.049	0.319745	7.39536e-143	1.69043e-138
	ARPC5	CD8.02	0.603	0.516	0.319611	4.4181e-86	1.00989e-81
	NDUFB7	CD8.02	0.526	0.449	0.319214	1.86081e-74	4.25344e-70
	SH3BP5	CD8.02	0.305	0.224	0.317633	2.24016e-63	5.12056e-59
	RHOA	CD8.02	0.847	0.795	0.317339	3.50296e-133	8.00706e-129
	C5orf56	CD8.02	0.287	0.211	0.316485	1.42705e-59	3.26196e-55
	BSG	CD8.02	0.524	0.436	0.314758	1.215e-80	2.77724e-76
	SASH3	CD8.02	0.367	0.282	0.314689	8.66966e-66	1.98171e-61
	THEMIS2	CD8.02	0.149	0.071	0.31391	3.14474e-104	7.18825e-100
	PRR5L	CD8.02	0.165	0.083	0.31367	2.08886e-101	4.77472e-97
	CD58	CD8.02	0.2	0.119	0.313415	1.36297e-79	3.11547e-75
	CTDSP1	CD8.02	0.331	0.255	0.312797	4.35224e-61	9.94836e-57
	WDR1	CD8.02	0.526	0.454	0.312061	8.54243e-65	1.95263e-60
	PTGDS	CD8.02	0.082	0.027	0.311977	1.01944e-111	2.33024e-107
	SYTL3	CD8.02	0.332	0.247	0.310591	1.98097e-62	4.52809e-58
	PSAP	CD8.02	0.466	0.392	0.310378	3.72966e-65	8.52527e-61
	LTBP4	CD8.02	0.178	0.107	0.309314	1.3271e-70	3.03349e-66
	PKN1	CD8.02	0.361	0.284	0.309059	4.67695e-61	1.06906e-56
	SLC15A4	CD8.02	0.179	0.101	0.309054	3.3375e-83	7.62885e-79
	RASAL3	CD8.02	0.468	0.384	0.307528	4.24658e-70	9.70684e-66
	CCL4	CD8.02	0.527	0.375	0.307337	2.3653e-114	5.4066e-110
	GBP5	CD8.02	0.336	0.262	0.304993	1.96929e-50	4.50141e-46
	TSEN54	CD8.02	0.364	0.279	0.30491	1.73997e-66	3.97722e-62
	THEMIS	CD8.02	0.355	0.282	0.304582	1.52345e-53	3.4823e-49
	PYHIN1	CD8.02	0.379	0.272	0.304233	2.21018e-81	5.05204e-77
	ZAP70	CD8.02	0.547	0.481	0.303666	5.5556e-69	1.2699e-64
	SAMD3	CD8.02	0.459	0.356	0.30246	7.8045e-75	1.78395e-70
	DDOST	CD8.02	0.497	0.421	0.302019	6.96582e-70	1.59225e-65
	PATL2	CD8.02	0.214	0.141	0.301992	3.39531e-60	7.761e-56
	KLRK1	CD8.02	0.626	0.557	0.301051	4.96991e-66	1.13602e-61
	SYTL1	CD8.02	0.442	0.368	0.300924	4.96496e-61	1.13489e-56
	TRGV2	CD8.02	0.179	0.119	0.300395	2.92804e-41	6.69292e-37
	ACTR3	CD8.02	0.589	0.518	0.299686	2.27393e-69	5.19774e-65
	PEPD	CD8.02	0.248	0.173	0.299479	7.19214e-62	1.64398e-57
	ANXA5	CD8.02	0.354	0.273	0.297653	9.68161e-58	2.21302e-53
	CD63	CD8.02	0.476	0.38	0.297359	1.79422e-70	4.10123e-66
	RAPGEF1	CD8.02	0.186	0.111	0.296873	2.91234e-73	6.65702e-69
	RNPEPL1	CD8.02	0.375	0.302	0.296398	6.32313e-57	1.44534e-52
	ADAM8	CD8.02	0.24	0.161	0.296059	3.40225e-66	7.77687e-62
	TBC1D10C	CD8.02	0.618	0.548	0.29605	4.65796e-73	1.06472e-68
	CCDC88C	CD8.02	0.359	0.294	0.294365	7.00768e-49	1.60181e-44
	PTPN12	CD8.02	0.168	0.092	0.293315	2.96516e-82	6.77777e-78
	GTF3C1	CD8.02	0.192	0.122	0.293054	8.92496e-64	2.04007e-59
	PDIA3	CD8.02	0.661	0.593	0.292839	6.06799e-78	1.38702e-73
	TMEM8A	CD8.02	0.168	0.101	0.292589	2.55054e-65	5.83001e-61
	PREX1	CD8.02	0.278	0.215	0.292466	3.70577e-46	8.47066e-42
	RORA	CD8.02	0.351	0.284	0.292018	1.61586e-47	3.69353e-43
	CISD3	CD8.02	0.284	0.213	0.291888	2.59469e-51	5.93093e-47
	PTGDR	CD8.02	0.3	0.208	0.291852	1.57368e-68	3.59711e-64
	GNB2	CD8.02	0.53	0.46	0.290904	7.19561e-66	1.64477e-61
	PRDM1	CD8.02	0.276	0.198	0.29035	1.03385e-54	2.36317e-50
	HSP90B1	CD8.02	0.674	0.611	0.289032	2.26792e-75	5.18401e-71
	MAPRE2	CD8.02	0.344	0.281	0.288471	1.24667e-43	2.84965e-39
	GAB3	CD8.02	0.184	0.107	0.288186	3.56931e-77	8.15872e-73
	BTN3A2	CD8.02	0.382	0.31	0.287562	3.46282e-50	7.91531e-46
	KIF19	CD8.02	0.085	0.021	0.287206	3.20973e-167	7.3368e-163
	CLEC2D	CD8.02	0.447	0.394	0.2864	2.20134e-41	5.03183e-37
	SYTL2	CD8.02	0.201	0.124	0.28592	4.27452e-69	9.77069e-65
	PGAM1	CD8.02	0.518	0.442	0.285585	6.58606e-64	1.50544e-59
	JAZF1	CD8.02	0.184	0.107	0.285347	6.66009e-75	1.52236e-70
	KIAA2013	CD8.02	0.178	0.109	0.285133	2.25409e-65	5.1524e-61
	AGTRAP	CD8.02	0.274	0.199	0.284619	1.49254e-54	3.41165e-50
	CD47	CD8.02	0.515	0.446	0.284043	3.50722e-57	8.0168e-53
	PTPN4	CD8.02	0.345	0.278	0.283494	9.16495e-47	2.09492e-42
	PAXX	CD8.02	0.648	0.582	0.28271	9.9267e-72	2.26905e-67
	PPP2R5C	CD8.02	0.573	0.488	0.282606	3.41947e-69	7.81622e-65
	FUT11	CD8.02	0.166	0.094	0.281201	4.34251e-74	9.9261e-70
	F2R	CD8.02	0.214	0.137	0.280084	3.44315e-66	7.87036e-62
	HLA-DPA1	CD8.02	0.626	0.494	0.280082	2.40997e-102	5.5087e-98
	SPSB3	CD8.02	0.376	0.309	0.279247	6.93774e-51	1.58583e-46
	TBCB	CD8.02	0.457	0.385	0.27752	1.07546e-56	2.45828e-52
	SEPTIN7	CD8.02	0.648	0.584	0.276573	6.64642e-69	1.51924e-64
	ANXA6	CD8.02	0.626	0.558	0.276416	1.50148e-66	3.43208e-62
	MT1E	CD8.02	0.183	0.113	0.275815	9.68523e-61	2.21385e-56
	AKR1C3	CD8.02	0.093	0.032	0.275571	7.64239e-113	1.7469e-108
	RALGDS	CD8.02	0.219	0.152	0.275435	5.03107e-52	1.15e-47
	MIEN1	CD8.02	0.335	0.26	0.275048	1.13069e-53	2.58454e-49
	DNAJC1	CD8.02	0.339	0.259	0.275035	2.93648e-56	6.71221e-52
	LCP1	CD8.02	0.758	0.693	0.273871	4.01074e-78	9.16776e-74
	MIR4435-2HG	CD8.02	0.174	0.106	0.272573	3.50711e-62	8.01655e-58
	TAP1	CD8.02	0.413	0.35	0.272249	1.29964e-46	2.97071e-42
	SLC1A7	CD8.02	0.076	0.014	0.271328	1.05119e-195	2.4028e-191
	RAB5IF	CD8.02	0.366	0.29	0.270897	3.86896e-54	8.84367e-50
	PDIA6	CD8.02	0.379	0.313	0.270466	2.04092e-45	4.66513e-41
	PLOD1	CD8.02	0.106	0.039	0.270345	1.62467e-120	3.71368e-116
	LAIR1	CD8.02	0.193	0.125	0.270284	3.61921e-58	8.27278e-54
	SYT11	CD8.02	0.167	0.1	0.269497	9.69611e-64	2.21634e-59
	ADAM10	CD8.02	0.251	0.183	0.269043	8.14209e-50	1.86112e-45
	BRK1	CD8.02	0.577	0.516	0.268935	7.89757e-60	1.80523e-55
	PLAAT4	CD8.02	0.685	0.632	0.267923	1.48182e-63	3.38715e-59
	RNF166	CD8.02	0.328	0.268	0.267728	3.62412e-40	8.28401e-36
	SRSF9	CD8.02	0.51	0.442	0.267476	3.96171e-56	9.05567e-52
	NPTN	CD8.02	0.187	0.119	0.267269	1.43808e-60	3.28717e-56
	PABPN1	CD8.02	0.444	0.381	0.267216	2.42314e-47	5.53881e-43
	TRAPPC10	CD8.02	0.245	0.18	0.26666	6.03976e-47	1.38057e-42
	CDC25B	CD8.02	0.389	0.334	0.266652	1.9556e-38	4.4701e-34
	IQGAP1	CD8.02	0.442	0.37	0.26612	2.25118e-48	5.14575e-44
	CAPN2	CD8.02	0.418	0.355	0.266042	2.37082e-44	5.41922e-40
	MACF1	CD8.02	0.38	0.324	0.266037	2.3186e-36	5.29985e-32
	CYTH1	CD8.02	0.43	0.374	0.265443	1.07558e-42	2.45857e-38
	SUPT4H1	CD8.02	0.316	0.251	0.265425	1.07762e-43	2.46323e-39
	DGKZ	CD8.02	0.386	0.326	0.264474	1.35808e-42	3.1043e-38
	AGAP1	CD8.02	0.096	0.03	0.264036	1.92395e-137	4.39777e-133
	UBL3	CD8.02	0.194	0.136	0.264016	4.31366e-43	9.86016e-39
	APOBEC3C	CD8.02	0.216	0.151	0.263096	4.87098e-48	1.11341e-43
	GK5	CD8.02	0.145	0.09	0.262832	7.97443e-49	1.8228e-44
	MFSD10	CD8.02	0.386	0.32	0.262111	4.498e-45	1.02815e-40
	VPS26B	CD8.02	0.23	0.174	0.262079	1.97053e-38	4.50424e-34
	SLC20A1	CD8.02	0.201	0.135	0.261924	1.35098e-52	3.08808e-48
	NFATC2	CD8.02	0.295	0.234	0.261288	1.49874e-39	3.42581e-35
	MAZ	CD8.02	0.354	0.3	0.260931	7.48932e-37	1.71191e-32
	SRGN	CD8.02	0.823	0.718	0.260695	6.99251e-99	1.59835e-94
	CYB561D2	CD8.02	0.254	0.188	0.260291	3.6071e-46	8.24511e-42
	ADGRG5	CD8.02	0.109	0.047	0.260266	3.31002e-91	7.56604e-87
	CSK	CD8.02	0.481	0.413	0.260043	2.39539e-52	5.47537e-48
	FNDC3B	CD8.02	0.104	0.05	0.259787	1.90542e-71	4.35541e-67
	RPTOR	CD8.02	0.127	0.068	0.259533	2.45042e-66	5.60117e-62
	CARD16	CD8.02	0.351	0.29	0.258178	7.51837e-41	1.71855e-36
	TPM4	CD8.02	0.218	0.164	0.257331	7.36462e-34	1.68341e-29
	DDIT4	CD8.02	0.395	0.342	0.257041	1.18326e-29	2.7047e-25
	RNF167	CD8.02	0.446	0.384	0.256664	2.31923e-45	5.30129e-41
	APBB1IP	CD8.02	0.488	0.428	0.256446	7.81104e-48	1.78545e-43
	FMNL1	CD8.02	0.388	0.327	0.256314	1.18589e-42	2.7107e-38
	TMEM50A	CD8.02	0.533	0.468	0.255529	8.48651e-57	1.93985e-52
	ZBTB7A	CD8.02	0.322	0.262	0.254866	9.27474e-39	2.12002e-34
	TFEB	CD8.02	0.108	0.046	0.254755	6.81617e-94	1.55804e-89
	TTC16	CD8.02	0.153	0.091	0.254675	1.32965e-57	3.03932e-53
	ANXA4	CD8.02	0.153	0.093	0.254175	1.00682e-53	2.30139e-49
	TMED9	CD8.02	0.362	0.3	0.253941	6.10507e-44	1.3955e-39
	CYTH4	CD8.02	0.221	0.162	0.253271	7.21849e-42	1.65e-37
	NFATC3	CD8.02	0.266	0.214	0.252725	1.18016e-31	2.6976e-27
	PSMA7	CD8.02	0.607	0.552	0.251911	3.33458e-53	7.62218e-49
	PSMB8	CD8.02	0.596	0.536	0.25045	5.59396e-55	1.27867e-50
	LINC02446	CD8.03	0.708	0.147	1.88772	0	0
	CCR7	CD8.03	0.692	0.071	1.88011	0	0
	LEF1	CD8.03	0.705	0.12	1.63785	0	0
	LTB	CD8.03	0.947	0.381	1.60148	0	0
	NOSIP	CD8.03	0.833	0.33	1.55023	0	0
	MAL	CD8.03	0.562	0.046	1.48907	0	0
	TCF7	CD8.03	0.771	0.28	1.38773	0	0
	SELL	CD8.03	0.795	0.241	1.36784	0	0
	SNHG29	CD8.03	0.891	0.59	1.29554	0	0
	PRKCQ-AS1	CD8.03	0.601	0.158	1.2846	0	0
	MYC	CD8.03	0.463	0.064	1.26001	0	0
	LDHB	CD8.03	0.969	0.649	1.20232	0	0
	GAS5	CD8.03	0.807	0.415	1.16094	0	0
	AIF1	CD8.03	0.424	0.046	1.15165	0	0
	ACTN1	CD8.03	0.394	0.025	1.08264	0	0
	EEF1G	CD8.03	0.919	0.761	1.06346	0	0
	EEF1B2	CD8.03	0.998	0.946	1.04978	0	0
	RCAN3	CD8.03	0.477	0.089	1.04411	0	0
	NELL2	CD8.03	0.516	0.128	0.993365	0	0
	PIK3IP1	CD8.03	0.601	0.217	0.986668	0	0
	S100B	CD8.03	0.198	0.029	0.950402	0	0
	ARMH1	CD8.03	0.35	0.047	0.930038	0	0
	TRABD2A	CD8.03	0.379	0.051	0.924541	0	0
	RGS10	CD8.03	0.755	0.372	0.921271	0	0
	NPM1	CD8.03	0.983	0.852	0.87954	0	0
	EIF3E	CD8.03	0.861	0.53	0.865802	0	0
	OXNAD1	CD8.03	0.529	0.187	0.845246	0	0
	SNHG8	CD8.03	0.759	0.433	0.834941	0	0
	PASK	CD8.03	0.351	0.074	0.827256	0	0
	SPINT2	CD8.03	0.343	0.038	0.82679	0	0
	FLT3LG	CD8.03	0.645	0.311	0.823993	0	0
	CAMK4	CD8.03	0.529	0.197	0.778787	0	0
	ABLIM1	CD8.03	0.474	0.166	0.775782	0	0
	LDLRAP1	CD8.03	0.421	0.126	0.76809	0	0
	SH3YL1	CD8.03	0.313	0.059	0.763753	0	0
	FOXP1	CD8.03	0.635	0.318	0.76004	0	0
	LEPROTL1	CD8.03	0.776	0.444	0.750198	0	0
	SATB1	CD8.03	0.373	0.094	0.74405	0	0
	SARAF	CD8.03	0.981	0.86	0.74219	0	0
	SERINC5	CD8.03	0.307	0.051	0.734666	0	0
	PIM2	CD8.03	0.406	0.136	0.719811	0	0
	NDFIP1	CD8.03	0.68	0.386	0.707594	0	0
	TMEM123	CD8.03	0.589	0.294	0.689061	0	0
	RPL4	CD8.03	0.982	0.906	0.683557	0	0
	RPL36A	CD8.03	0.992	0.94	0.669542	0	0
	SOCS3	CD8.03	0.266	0.072	0.665324	0	0
	TXK	CD8.03	0.288	0.056	0.66274	0	0
	CD55	CD8.03	0.436	0.177	0.659402	0	0
	ST13	CD8.03	0.685	0.395	0.657364	0	0
	AQP3	CD8.03	0.318	0.092	0.645084	0	0
	BACH2	CD8.03	0.243	0.026	0.640953	0	0
	SNHG5	CD8.03	0.531	0.281	0.639917	0	0
	PABPC1	CD8.03	0.927	0.852	0.637521	0	0
	HSPB1	CD8.03	0.571	0.301	0.624797	0	0
	CD7	CD8.03	0.846	0.616	0.611768	0	0
	PCED1B	CD8.03	0.374	0.145	0.610276	0	0
	TMIGD2	CD8.03	0.215	0.014	0.596288	0	0
	PDE3B	CD8.03	0.422	0.178	0.594321	0	0
	BEX3	CD8.03	0.23	0.034	0.593939	0	0
	CHRM3-AS2	CD8.03	0.204	0.017	0.59365	0	0
	RPL7	CD8.03	0.971	0.844	0.59293	0	0
	IL7R	CD8.03	0.852	0.451	0.590202	0	0
	RPL38	CD8.03	0.985	0.908	0.589754	0	0
	EIF3H	CD8.03	0.824	0.569	0.587524	0	0
	TGFBR2	CD8.03	0.47	0.243	0.582405	2.67796e-284	6.12128e-280
	CLEC11A	CD8.03	0.195	0.013	0.580744	0	0
	PIM1	CD8.03	0.49	0.259	0.579172	1.34707e-274	3.07914e-270
	ZFAS1	CD8.03	0.783	0.527	0.57625	0	0
	PPA1	CD8.03	0.496	0.239	0.575764	0	0
	ALKBH7	CD8.03	0.55	0.291	0.572048	0	0
	RPL17	CD8.03	0.979	0.914	0.571768	0	0
	CD27	CD8.03	0.629	0.305	0.571191	0	0
	MAML2	CD8.03	0.31	0.101	0.563509	0	0
	EEF2	CD8.03	0.96	0.884	0.544811	0	0
	NFKBIZ	CD8.03	0.32	0.121	0.544256	0	0
	LRRN3	CD8.03	0.164	0.007	0.54116	0	0
	IL6ST	CD8.03	0.244	0.06	0.536009	0	0
	SNX9	CD8.03	0.217	0.042	0.534357	0	0
	RSL1D1	CD8.03	0.6	0.355	0.52482	7.48075e-271	1.70995e-266
	A1BG	CD8.03	0.304	0.109	0.52366	0	0
	AC243960.1	CD8.03	0.415	0.195	0.520207	1.45245e-280	3.32001e-276
	EPHX2	CD8.03	0.201	0.029	0.519923	0	0
	DGKA	CD8.03	0.356	0.144	0.515302	0	0
	SNHG32	CD8.03	0.292	0.105	0.515287	0	0
	EIF3L	CD8.03	0.772	0.534	0.51494	8.46867e-288	1.93577e-283
	PCBP2	CD8.03	0.844	0.644	0.500131	3.76622e-252	8.60882e-248
	TCEA3	CD8.03	0.165	0.01	0.49873	0	0
	EIF2S3	CD8.03	0.53	0.299	0.49852	4.76985e-248	1.09029e-243
	IMPDH2	CD8.03	0.341	0.144	0.48862	1.83585e-285	4.19639e-281
	PCED1B-AS1	CD8.03	0.829	0.665	0.484856	3.00963e-206	6.87942e-202
	NSA2	CD8.03	0.678	0.444	0.479305	4.93031e-229	1.12697e-224
	COX7C	CD8.03	0.97	0.861	0.476795	0	0
	SERP1	CD8.03	0.747	0.525	0.472792	1.94903e-234	4.45509e-230
	BTF3	CD8.03	0.99	0.931	0.468512	0	0
	RPL31	CD8.03	0.977	0.897	0.465304	0	0
	SNHG7	CD8.03	0.421	0.219	0.464554	8.15351e-223	1.86373e-218
	NOP53	CD8.03	0.865	0.696	0.464396	2.91938e-260	6.67313e-256
	CD248	CD8.03	0.156	0.008	0.463875	0	0
	PCSK1N	CD8.03	0.184	0.04	0.462094	0	0
	SMDT1	CD8.03	0.675	0.448	0.461652	1.72019e-210	3.932e-206
	C1orf162	CD8.03	0.336	0.126	0.458881	0	0
	TESPA1	CD8.03	0.288	0.11	0.457949	6.03987e-279	1.38059e-274
	NT5E	CD8.03	0.175	0.024	0.450669	0	0
	MGAT4A	CD8.03	0.606	0.381	0.449179	2.16072e-208	4.93897e-204
	FHIT	CD8.03	0.144	0.017	0.446777	0	0
	ATP5PO	CD8.03	0.684	0.486	0.441344	1.47369e-177	3.36855e-173
	UXT	CD8.03	0.756	0.541	0.440322	8.27283e-214	1.891e-209
	NCF1	CD8.03	0.24	0.082	0.438694	3.17887e-282	7.26626e-278
	RPS17	CD8.03	0.721	0.526	0.435045	1.00318e-188	2.29306e-184
	ANP32B	CD8.03	0.721	0.504	0.434426	8.33824e-204	1.90595e-199
	SNHG6	CD8.03	0.72	0.509	0.432916	7.66567e-191	1.75222e-186
	SCGB3A1	CD8.03	0.132	0.018	0.430901	0	0
	RIC3	CD8.03	0.211	0.061	0.430464	0	0
	C12orf57	CD8.03	0.914	0.754	0.430034	1.50461e-242	3.43923e-238
	ITGA6	CD8.03	0.236	0.071	0.427817	0	0
	CCDC18-AS1	CD8.03	0.348	0.178	0.424236	1.65895e-182	3.79203e-178
	TMEM243	CD8.03	0.408	0.223	0.423143	3.41501e-186	7.80603e-182
	GYPC	CD8.03	0.759	0.557	0.422234	9.43236e-191	2.15605e-186
	TMEM14C	CD8.03	0.221	0.071	0.414678	1.99141e-283	4.55196e-279
	COX4I1	CD8.03	0.984	0.914	0.412288	0	0
	FBL	CD8.03	0.532	0.327	0.407834	3.37986e-174	7.72569e-170
	PDK1	CD8.03	0.176	0.036	0.406287	0	0
	CITED4	CD8.03	0.192	0.052	0.402759	0	0
	THEM4	CD8.03	0.306	0.136	0.402496	7.66112e-219	1.75118e-214
	SEPTIN6	CD8.03	0.58	0.389	0.402066	4.03748e-152	9.22886e-148
	CHCHD10	CD8.03	0.471	0.28	0.399973	2.03827e-165	4.65907e-161
	ATF7IP2	CD8.03	0.293	0.132	0.399049	1.29754e-205	2.96592e-201
	CHMP7	CD8.03	0.2	0.063	0.398788	3.74983e-265	8.57135e-261
	LINC01550	CD8.03	0.212	0.071	0.397959	1.64381e-253	3.75741e-249
	GIMAP5	CD8.03	0.466	0.287	0.39751	1.02411e-144	2.34092e-140
	RPS11	CD8.03	0.938	0.826	0.394162	8.59802e-260	1.96534e-255
	LEF1-AS1	CD8.03	0.134	0.011	0.389665	0	0
	PRMT2	CD8.03	0.677	0.478	0.378468	6.14015e-152	1.40351e-147
	BCL2	CD8.03	0.301	0.148	0.375685	1.37289e-169	3.13814e-165
	C1QBP	CD8.03	0.526	0.332	0.374141	1.4905e-149	3.40699e-145
	ADTRP	CD8.03	0.097	0.002	0.373335	0	0
	ATP6V0E2	CD8.03	0.332	0.17	0.373282	1.90453e-168	4.35338e-164
	RPL13A	CD8.03	0.955	0.873	0.372238	3.21694e-246	7.35329e-242
	RUNX2	CD8.03	0.165	0.038	0.372138	0	0
	NUCB2	CD8.03	0.518	0.338	0.371552	4.11584e-133	9.408e-129
	HSP90AB1	CD8.03	0.892	0.741	0.371086	7.88011e-202	1.80124e-197
	CD79A	CD8.03	0.111	0.006	0.370167	0	0
	FOS	CD8.03	0.592	0.447	0.368621	1.92985e-105	4.41125e-101
	HNRNPA1	CD8.03	0.971	0.894	0.368605	1.29289e-260	2.95528e-256
	EPB41L4A-AS1	CD8.03	0.325	0.169	0.358598	2.37105e-154	5.41973e-150
	ZNF101	CD8.03	0.202	0.076	0.358098	8.17688e-201	1.86907e-196
	PRDX6	CD8.03	0.544	0.373	0.357432	1.81652e-116	4.1522e-112
	ITM2C	CD8.03	0.18	0.052	0.355945	1.61335e-265	3.68781e-261
	UQCRB	CD8.03	0.917	0.8	0.355496	1.33898e-187	3.06064e-183
	FAM153CP	CD8.03	0.125	0.014	0.354895	0	0
	SESN3	CD8.03	0.172	0.06	0.354351	5.91073e-196	1.35108e-191
	LSM5	CD8.03	0.402	0.234	0.353584	1.20176e-139	2.74699e-135
	PRKCA	CD8.03	0.171	0.045	0.352503	1.39433e-288	3.18717e-284
	APEX1	CD8.03	0.413	0.244	0.351694	1.14173e-138	2.60976e-134
	DNPH1	CD8.03	0.252	0.11	0.350522	6.21173e-186	1.41988e-181
	GPX4	CD8.03	0.669	0.476	0.349344	5.41785e-133	1.23841e-128
	PRKAR1B	CD8.03	0.151	0.036	0.349288	4.04333e-286	9.24225e-282
	MDS2	CD8.03	0.102	0.005	0.34595	0	0
	MCUB	CD8.03	0.555	0.356	0.339902	8.78034e-144	2.00701e-139
	SELENOH	CD8.03	0.621	0.44	0.332118	1.07162e-115	2.4495e-111
	RHOH	CD8.03	0.539	0.354	0.328305	2.71953e-126	6.21631e-122
	CARS	CD8.03	0.218	0.103	0.327904	8.62346e-133	1.97115e-128
	REG4	CD8.03	0.099	0.001	0.327619	0	0
	NOG	CD8.03	0.101	0.001	0.324617	0	0
	RPL23	CD8.03	0.825	0.655	0.32451	8.15448e-154	1.86395e-149
	SUSD3	CD8.03	0.153	0.04	0.324059	5.10425e-257	1.16673e-252
	APBB1	CD8.03	0.215	0.089	0.321602	5.78366e-172	1.32203e-167
	HSPD1	CD8.03	0.388	0.23	0.320455	2.82665e-122	6.46116e-118
	BEX2	CD8.03	0.237	0.1	0.319811	1.15155e-179	2.63222e-175
	COMMD6	CD8.03	0.939	0.829	0.318054	5.47459e-157	1.25138e-152
	IFNGR2	CD8.03	0.099	0.005	0.316453	0	0
	RAPGEF6	CD8.03	0.266	0.129	0.31534	8.40301e-149	1.92076e-144
	PABPC4	CD8.03	0.243	0.112	0.31524	6.33381e-155	1.44778e-150
	FAM102A	CD8.03	0.193	0.075	0.315154	1.29887e-176	2.96896e-172
	HINT1	CD8.03	0.953	0.848	0.314099	6.75203e-172	1.54338e-167
	SFXN1	CD8.03	0.346	0.194	0.313601	2.019e-129	4.61502e-125
	EIF4EBP3	CD8.03	0.119	0.021	0.309971	0	0
	RETREG1	CD8.03	0.14	0.032	0.308848	1.34673e-271	3.07835e-267
	LINC00861	CD8.03	0.605	0.431	0.308615	2.96398e-107	6.77506e-103
	PADI4	CD8.03	0.093	0.005	0.301869	0	0
	SIRPG	CD8.03	0.238	0.107	0.301739	7.91974e-161	1.81029e-156
	LINC00402	CD8.03	0.142	0.041	0.301375	7.90187e-213	1.80621e-208
	PLEKHB1	CD8.03	0.157	0.049	0.298485	9.69099e-209	2.21517e-204
	TMEM204	CD8.03	0.196	0.088	0.296681	1.47212e-131	3.36498e-127
	GIMAP1	CD8.03	0.411	0.273	0.29573	6.77171e-84	1.54788e-79
	BIRC3	CD8.03	0.178	0.071	0.293036	4.6906e-154	1.07218e-149
	ILF3-DT	CD8.03	0.271	0.143	0.292695	6.68053e-121	1.52704e-116
	RAB3GAP1	CD8.03	0.129	0.031	0.292452	1.40696e-236	3.21603e-232
	AK5	CD8.03	0.1	0.014	0.28808	0	0
	PITPNA-AS1	CD8.03	0.18	0.074	0.287353	1.28158e-146	2.92944e-142
	NAP1L1	CD8.03	0.583	0.401	0.28716	6.84256e-112	1.56407e-107
	MMP28	CD8.03	0.084	0.002	0.286311	0	0
	JAML	CD8.03	0.142	0.043	0.285185	1.27631e-193	2.91739e-189
	FXYD5	CD8.03	0.939	0.837	0.28495	1.52826e-134	3.49329e-130
	TNFSF8	CD8.03	0.168	0.068	0.284745	3.63488e-143	8.30861e-139
	YPEL2	CD8.03	0.145	0.05	0.283147	1.87134e-163	4.27751e-159
	GABPB1-AS1	CD8.03	0.221	0.105	0.281506	1.63287e-129	3.73242e-125
	APBA2	CD8.03	0.192	0.077	0.281334	8.19391e-159	1.87296e-154
	GABPB1-IT1	CD8.03	0.241	0.129	0.279806	1.12881e-102	2.58024e-98
	NAA16	CD8.03	0.228	0.113	0.27621	5.5428e-119	1.26697e-114
	SYPL1	CD8.03	0.245	0.119	0.27452	1.27793e-133	2.9211e-129
	TATDN1	CD8.03	0.204	0.098	0.274005	3.60227e-117	8.23407e-113
	SVIP	CD8.03	0.297	0.17	0.273369	4.38102e-102	1.00141e-97
	LGALS3BP	CD8.03	0.11	0.019	0.273355	3.63672e-287	8.31282e-283
	PLP2	CD8.03	0.415	0.275	0.272769	1.00844e-82	2.30508e-78
	CLNS1A	CD8.03	0.36	0.22	0.272009	1.38818e-98	3.1731e-94
	IL6R	CD8.03	0.092	0.008	0.270668	0	0
	ADPRM	CD8.03	0.124	0.034	0.269318	1.24196e-197	2.83888e-193
	CLN5	CD8.03	0.119	0.029	0.267697	9.76313e-221	2.23166e-216
	BEX4	CD8.03	0.214	0.096	0.267432	1.22529e-142	2.80076e-138
	TOB1	CD8.03	0.309	0.181	0.265697	4.26639e-97	9.75211e-93
	RPS20	CD8.03	0.679	0.498	0.261848	1.23242e-120	2.81708e-116
	PDCD4-AS1	CD8.03	0.12	0.036	0.261772	3.25581e-168	7.44212e-164
	U2AF1L4	CD8.03	0.234	0.121	0.260818	4.02175e-108	9.19291e-104
	MT-ATP8	CD8.03	0.861	0.77	0.259815	1.62084e-64	3.70491e-60
	AL138963.4	CD8.03	0.247	0.192	0.259074	8.42553e-20	1.92591e-15
	TOMM20	CD8.03	0.63	0.463	0.258941	1.83887e-85	4.2033e-81
	RNF157	CD8.03	0.107	0.022	0.258896	3.57928e-232	8.18152e-228
	RBIS	CD8.03	0.431	0.298	0.258356	5.67834e-71	1.29795e-66
	BCL11B	CD8.03	0.428	0.281	0.257129	9.5884e-90	2.19172e-85
	SUPT3H	CD8.03	0.224	0.114	0.256191	3.16451e-108	7.23343e-104
	TTN	CD8.03	0.118	0.035	0.254154	1.04878e-165	2.3973e-161
	OXA1L	CD8.03	0.36	0.225	0.253314	1.39413e-88	3.18671e-84
	UBALD2	CD8.03	0.385	0.306	0.25197	1.3458e-31	3.07624e-27
	TOMM7	CD8.03	0.96	0.886	0.250837	2.70532e-119	6.18382e-115
	GZMK	CD8.04	0.956	0.252	2.28128	0	0
	DUSP2	CD8.04	0.892	0.515	1.51147	0	0
	JUN	CD8.04	0.724	0.571	0.917058	1.05887e-285	2.42037e-281
	CD74	CD8.04	0.934	0.782	0.826871	0	0
	JUNB	CD8.04	0.895	0.8	0.816389	0	0
	CXCR4	CD8.04	0.803	0.616	0.782784	0	0
	ZFP36L2	CD8.04	0.943	0.861	0.7799	0	0
	CD69	CD8.04	0.652	0.453	0.72522	1.01943e-293	2.33022e-289
	IL7R	CD8.04	0.754	0.469	0.707145	0	0
	CLDND1	CD8.04	0.439	0.265	0.702522	8.32145e-217	1.90212e-212
	NFKBIA	CD8.04	0.685	0.547	0.674577	1.98462e-194	4.53644e-190
	DUSP1	CD8.04	0.735	0.591	0.67109	1.68233e-219	3.84548e-215
	COTL1	CD8.04	0.591	0.376	0.665707	7.0957e-286	1.62194e-281
	CD27	CD8.04	0.547	0.321	0.653462	1.41225e-298	3.22813e-294
	DNAJB1	CD8.04	0.688	0.531	0.609014	1.33529e-239	3.05221e-235
	PIK3R1	CD8.04	0.591	0.427	0.598821	1.18327e-214	2.70472e-210
	ZFP36	CD8.04	0.793	0.67	0.597163	1.46092e-214	3.33937e-210
	LYAR	CD8.04	0.658	0.446	0.586387	7.58759e-257	1.73437e-252
	TENT5C	CD8.04	0.305	0.138	0.579896	7.85992e-248	1.79662e-243
	RGS1	CD8.04	0.162	0.043	0.573321	4.25672e-279	9.73e-275
	IFNG-AS1	CD8.04	0.148	0.02	0.539365	0	0
	PHACTR2	CD8.04	0.228	0.093	0.533032	7.98162e-220	1.82444e-215
	NR4A2	CD8.04	0.337	0.21	0.518633	1.58965e-127	3.63362e-123
	TNFAIP3	CD8.04	0.541	0.423	0.497247	1.21613e-103	2.77984e-99
	CMC1	CD8.04	0.62	0.408	0.488679	2.00252e-202	4.57736e-198
	MS4A1	CD8.04	0.127	0.012	0.481646	0	0
	TRAT1	CD8.04	0.234	0.11	0.469259	8.04285e-168	1.83844e-163
	BTG2	CD8.04	0.414	0.303	0.468862	3.21291e-99	7.34408e-95
	FOS	CD8.04	0.549	0.455	0.464351	2.28821e-65	5.2304e-61
	GPR183	CD8.04	0.178	0.068	0.456277	3.63136e-180	8.30056e-176
	IER2	CD8.04	0.681	0.613	0.455481	7.56677e-77	1.72961e-72
	PIM3	CD8.04	0.24	0.134	0.455109	4.81582e-117	1.1008e-112
	CXCR3	CD8.04	0.25	0.138	0.436041	1.34275e-120	3.06925e-116
	EML4	CD8.04	0.463	0.345	0.420501	8.71402e-107	1.99185e-102
	MCUB	CD8.04	0.492	0.368	0.405495	4.92621e-108	1.12603e-103
	SH2D1A	CD8.04	0.36	0.229	0.395904	3.84258e-113	8.78338e-109
	SRSF7	CD8.04	0.721	0.639	0.385692	8.38383e-110	1.91638e-105
	CSRNP1	CD8.04	0.189	0.095	0.381658	7.0372e-112	1.60856e-107
	PDE4B	CD8.04	0.181	0.092	0.368723	1.71791e-102	3.9268e-98
	HERPUD1	CD8.04	0.45	0.354	0.361408	2.43911e-64	5.57531e-60
	FCRL3	CD8.04	0.176	0.085	0.361196	3.25688e-110	7.44458e-106
	PDCD4	CD8.04	0.437	0.334	0.359863	2.63769e-79	6.02924e-75
	INPP4B	CD8.04	0.254	0.169	0.33973	2.54716e-66	5.8223e-62
	ZNF331	CD8.04	0.157	0.086	0.335274	5.09877e-72	1.16548e-67
	HNRNPLL	CD8.04	0.173	0.095	0.3338	3.65036e-79	8.34399e-75
	PMAIP1	CD8.04	0.158	0.086	0.331739	1.5928e-70	3.64081e-66
	TSPYL2	CD8.04	0.254	0.183	0.331127	1.37055e-46	3.13279e-42
	CD28	CD8.04	0.131	0.057	0.327878	4.00696e-106	9.15911e-102
	LYST	CD8.04	0.274	0.184	0.324376	1.18496e-65	2.70858e-61
	RHOH	CD8.04	0.453	0.37	0.321426	5.31282e-55	1.2144e-50
	FYN	CD8.04	0.642	0.531	0.318852	7.91896e-89	1.81012e-84
	NCK2	CD8.04	0.277	0.199	0.310522	3.18066e-54	7.27036e-50
	CD82	CD8.04	0.147	0.074	0.308057	9.2042e-83	2.1039e-78
	SELENOM	CD8.04	0.265	0.185	0.304699	3.59606e-58	8.21987e-54
	CNN2	CD8.04	0.651	0.551	0.304311	4.0577e-80	9.27509e-76
	EOMES	CD8.04	0.236	0.144	0.301479	3.00112e-72	6.85996e-68
	SBDS	CD8.04	0.426	0.349	0.301148	5.80309e-50	1.32647e-45
	CKLF	CD8.04	0.435	0.352	0.29824	4.97401e-53	1.13696e-48
	MAP3K8	CD8.04	0.239	0.163	0.294279	5.78191e-50	1.32163e-45
	CBLB	CD8.04	0.353	0.269	0.293917	5.62299e-54	1.2853e-49
	P2RY8	CD8.04	0.404	0.333	0.29169	3.4924e-42	7.98293e-38
	PBXIP1	CD8.04	0.314	0.241	0.29001	5.79856e-44	1.32543e-39
	NCF1	CD8.04	0.162	0.096	0.287243	1.33175e-57	3.04411e-53
	DKK3	CD8.04	0.066	0.009	0.286656	1.8063e-212	4.12883e-208
	ITM2A	CD8.04	0.413	0.338	0.285113	2.54987e-40	5.8285e-36
	IGLV2-14	CD8.04	0.174	0.11	0.282814	5.4761e-46	1.25173e-41
	LEPROTL1	CD8.04	0.561	0.483	0.281563	1.46295e-46	3.34402e-42
	XCL2	CD8.04	0.186	0.126	0.280204	1.4021e-38	3.20493e-34
	AREG	CD8.04	0.101	0.048	0.279345	8.53034e-62	1.94987e-57
	TERF2IP	CD8.04	0.489	0.425	0.278187	5.63747e-42	1.28861e-37
	DDX24	CD8.04	0.601	0.538	0.275646	1.8053e-49	4.12655e-45
	IFRD1	CD8.04	0.235	0.176	0.265281	3.82296e-34	8.73853e-30
	FOSB	CD8.04	0.21	0.157	0.261349	9.8314e-30	2.24726e-25
	TC2N	CD8.04	0.405	0.33	0.259583	1.36045e-43	3.10973e-39
	SELENOK	CD8.04	0.409	0.35	0.257787	4.33453e-34	9.90787e-30
	TUBA4A	CD8.04	0.395	0.336	0.256217	3.70748e-30	8.47456e-26
	IL10RA	CD8.04	0.494	0.416	0.255663	1.86603e-43	4.26538e-39
	KLRC2	CD8.05	0.49	0.063	2.1005	0	0
	TYROBP	CD8.05	0.421	0.057	1.93323	0	0
	FCGR3A	CD8.05	0.716	0.18	1.54249	0	0
	GZMB	CD8.05	0.894	0.367	1.33698	0	0
	PRF1	CD8.05	0.929	0.5	1.27784	0	0
	GNLY	CD8.05	0.959	0.481	1.27396	0	0
	TRGV2	CD8.05	0.306	0.101	1.13551	0	0
	EFHD2	CD8.05	0.863	0.454	1.12079	0	0
	KLRF1	CD8.05	0.457	0.101	1.10914	0	0
	FGFBP2	CD8.05	0.823	0.375	1.09283	0	0
	SPON2	CD8.05	0.549	0.236	1.07516	0	0
	MTRNR2L8	CD8.05	0.291	0.178	0.983281	4.62768e-97	1.0578e-92
	ADGRG1	CD8.05	0.618	0.222	0.983193	0	0
	CX3CR1	CD8.05	0.555	0.195	0.966531	0	0
	NKG7	CD8.05	0.999	0.772	0.958877	0	0
	GZMH	CD8.05	0.953	0.533	0.946971	0	0
	HOPX	CD8.05	0.622	0.303	0.893019	0	0
	ABHD17A	CD8.05	0.772	0.47	0.88594	0	0
	TTC38	CD8.05	0.439	0.127	0.883832	0	0
	CST7	CD8.05	0.984	0.722	0.871225	0	0
	TRGV8	CD8.05	0.252	0.059	0.852624	0	0
	KLRD1	CD8.05	0.786	0.378	0.846455	0	0
	S1PR5	CD8.05	0.504	0.178	0.842063	0	0
	CTSW	CD8.05	0.95	0.79	0.823693	0	0
	KIR2DL3	CD8.05	0.21	0.018	0.815141	0	0
	ZEB2	CD8.05	0.606	0.278	0.790691	0	0
	RHOC	CD8.05	0.516	0.226	0.785323	0	0
	ITGB2	CD8.05	0.934	0.736	0.776258	0	0
	TBX21	CD8.05	0.541	0.234	0.773814	0	0
	PLEK	CD8.05	0.73	0.398	0.746903	0	0
	CD63	CD8.05	0.636	0.359	0.742843	0	0
	PRSS23	CD8.05	0.465	0.177	0.73214	0	0
	IFITM2	CD8.05	0.86	0.729	0.716834	0	0
	KLRC3	CD8.05	0.216	0.025	0.712591	0	0
	FGR	CD8.05	0.419	0.154	0.711124	0	0
	PLAC8	CD8.05	0.518	0.278	0.707497	0	0
	CEP78	CD8.05	0.382	0.145	0.701797	0	0
	FCRL6	CD8.05	0.544	0.252	0.694884	0	0
	PTGDR	CD8.05	0.437	0.19	0.692594	0	0
	CYBA	CD8.05	0.973	0.884	0.686799	0	0
	CLIC3	CD8.05	0.363	0.166	0.671959	2.64449e-263	6.04477e-259
	TIGIT	CD8.05	0.403	0.179	0.667359	0	0
	SLC9A3R1	CD8.05	0.81	0.561	0.666129	0	0
	ASCL2	CD8.05	0.327	0.113	0.661453	0	0
	IKZF2	CD8.05	0.208	0.028	0.653316	0	0
	LAIR2	CD8.05	0.278	0.093	0.652878	0	0
	CD247	CD8.05	0.682	0.447	0.648078	0	0
	SYNGR1	CD8.05	0.255	0.074	0.647527	0	0
	TGFB1	CD8.05	0.814	0.601	0.644174	0	0
	APMAP	CD8.05	0.643	0.379	0.616137	0	0
	MATK	CD8.05	0.596	0.344	0.603412	2.39983e-299	5.48553e-295
	CD300A	CD8.05	0.313	0.116	0.600716	0	0
	KLRB1	CD8.05	0.397	0.22	0.595303	1.06699e-164	2.43893e-160
	CTSD	CD8.05	0.565	0.357	0.588126	3.80245e-244	8.69164e-240
	TRDC	CD8.05	0.094	0.009	0.586593	0	0
	IL2RB	CD8.05	0.392	0.195	0.58581	1.66563e-247	3.8073e-243
	RASSF1	CD8.05	0.552	0.32	0.567063	9.10492e-260	2.0812e-255
	CTSC	CD8.05	0.718	0.46	0.564069	1.71615e-298	3.92277e-294
	AOAH	CD8.05	0.456	0.231	0.559716	2.85395e-267	6.52356e-263
	SPN	CD8.05	0.542	0.321	0.557551	2.6484e-242	6.05372e-238
	LGALS1	CD8.05	0.598	0.369	0.552811	5.1063e-212	1.1672e-207
	FLNA	CD8.05	0.765	0.561	0.551684	9.24991e-254	2.11434e-249
	MTSS1	CD8.05	0.27	0.094	0.549333	2.34207e-298	5.35351e-294
	DOK2	CD8.05	0.536	0.309	0.544853	3.7729e-243	8.62409e-239
	C1orf21	CD8.05	0.405	0.189	0.541543	2.83615e-266	6.48287e-262
	ABI3	CD8.05	0.386	0.194	0.532218	3.55036e-223	8.11542e-219
	MBP	CD8.05	0.665	0.463	0.531728	1.1166e-223	2.55232e-219
	GNAI2	CD8.05	0.749	0.549	0.531267	6.08139e-239	1.39008e-234
	ARPC2	CD8.05	0.949	0.839	0.527218	0	0
	NCR1	CD8.05	0.173	0.025	0.526416	0	0
	SH2D2A	CD8.05	0.464	0.267	0.526113	1.13252e-204	2.58872e-200
	CLIC1	CD8.05	0.894	0.701	0.521868	0	0
	CDK2AP2	CD8.05	0.472	0.277	0.516694	1.44903e-195	3.31219e-191
	CAPNS1	CD8.05	0.506	0.32	0.513742	1.52013e-188	3.47471e-184
	TPST2	CD8.05	0.568	0.357	0.512972	8.98454e-217	2.05369e-212
	ARPC5L	CD8.05	0.609	0.403	0.510226	5.36099e-215	1.22541e-210
	KIR3DL1	CD8.05	0.11	0.012	0.509604	0	0
	SSBP4	CD8.05	0.586	0.387	0.508228	3.05078e-198	6.97347e-194
	GNPTAB	CD8.05	0.328	0.16	0.506175	1.2965e-196	2.96353e-192
	CD81	CD8.05	0.72	0.503	0.504365	8.33211e-221	1.90455e-216
	GZMA	CD8.05	0.957	0.682	0.503299	0	0
	MYO1F	CD8.05	0.483	0.28	0.503075	6.86935e-203	1.5702e-198
	TRGV4	CD8.05	0.152	0.059	0.502036	6.14596e-132	1.40484e-127
	ARL4C	CD8.05	0.841	0.641	0.50049	5.69956e-254	1.3028e-249
	TLN1	CD8.05	0.593	0.404	0.497237	1.10791e-189	2.53245e-185
	PTGDS	CD8.05	0.088	0.028	0.497009	3.41765e-106	7.81206e-102
	NCR3	CD8.05	0.262	0.115	0.49623	2.15164e-193	4.91822e-189
	TGFBR3	CD8.05	0.429	0.232	0.490113	5.47292e-202	1.251e-197
	LITAF	CD8.05	0.867	0.693	0.489971	1.55059e-273	3.54434e-269
	CXXC5	CD8.05	0.162	0.032	0.48723	0	0
	CALR	CD8.05	0.716	0.579	0.484043	3.77591e-142	8.63098e-138
	APOBEC3G	CD8.05	0.525	0.319	0.483385	9.33464e-194	2.13371e-189
	IGF2R	CD8.05	0.337	0.175	0.48099	1.74533e-177	3.98948e-173
	LSP1	CD8.05	0.909	0.792	0.477622	2.9801e-277	6.81191e-273
	ADGRE5	CD8.05	0.557	0.375	0.474133	2.63963e-163	6.03367e-159
	CD160	CD8.05	0.193	0.066	0.467555	3.01152e-210	6.88373e-206
	PYHIN1	CD8.05	0.466	0.263	0.460704	8.38352e-196	1.91631e-191
	SASH3	CD8.05	0.452	0.273	0.45917	6.12792e-169	1.40072e-164
	METRNL	CD8.05	0.207	0.075	0.457201	8.67032e-211	1.98186e-206
	GNG2	CD8.05	0.588	0.383	0.454715	2.43302e-190	5.56139e-186
	ADAM8	CD8.05	0.307	0.154	0.453391	1.11458e-169	2.54771e-165
	PPP1R18	CD8.05	0.61	0.422	0.449035	2.85534e-171	6.52674e-167
	SLC15A4	CD8.05	0.236	0.095	0.448754	7.73629e-200	1.76836e-195
	CCL3	CD8.05	0.143	0.04	0.447241	4.32097e-206	9.87688e-202
	CMC1	CD8.05	0.644	0.408	0.44667	4.61841e-204	1.05568e-199
	BIN2	CD8.05	0.737	0.579	0.44607	2.61538e-175	5.97824e-171
	PPP1CA	CD8.05	0.796	0.637	0.444142	1.13278e-200	2.58932e-196
	PTPN12	CD8.05	0.221	0.087	0.44101	5.91956e-193	1.35309e-188
	ANXA2	CD8.05	0.601	0.392	0.439816	4.14722e-182	9.47971e-178
	ZBTB7A	CD8.05	0.405	0.252	0.438293	2.89398e-137	6.61506e-133
	G6PD	CD8.05	0.318	0.173	0.437957	3.5377e-149	8.08647e-145
	SEPTIN7	CD8.05	0.726	0.574	0.437323	1.53697e-163	3.51322e-159
	ITGAM	CD8.05	0.211	0.076	0.436897	3.96241e-213	9.05729e-209
	ANXA6	CD8.05	0.71	0.548	0.435742	6.40175e-166	1.46331e-161
	SRGN	CD8.05	0.88	0.714	0.435559	6.32307e-212	1.44533e-207
	ZAP70	CD8.05	0.634	0.47	0.431288	2.42896e-149	5.55213e-145
	KLRG1	CD8.05	0.608	0.416	0.42962	2.06259e-155	4.71467e-151
	PKN1	CD8.05	0.422	0.277	0.429562	8.21159e-124	1.87701e-119
	TNFRSF1B	CD8.05	0.377	0.212	0.427446	1.80845e-154	4.13376e-150
	MXRA7	CD8.05	0.275	0.133	0.426172	1.65214e-161	3.77646e-157
	PRELID1	CD8.05	0.61	0.444	0.424569	1.04869e-153	2.39709e-149
	LPCAT1	CD8.05	0.274	0.131	0.423959	3.1037e-163	7.09445e-159
	IL2RG	CD8.05	0.841	0.707	0.422672	2.11515e-177	4.83481e-173
	CAST	CD8.05	0.603	0.443	0.422005	3.28728e-137	7.51406e-133
	ARHGAP9	CD8.05	0.486	0.327	0.421732	2.97762e-134	6.80625e-130
	KIR3DL2	CD8.05	0.107	0.014	0.418015	0	0
	PDIA3	CD8.05	0.735	0.584	0.417483	1.58722e-150	3.62806e-146
	DHRS7	CD8.05	0.636	0.449	0.417133	2.98883e-168	6.83187e-164
	CCL5	CD8.05	0.995	0.811	0.416631	1.89186e-248	4.32442e-244
	PLAAT4	CD8.05	0.765	0.621	0.414679	1.18679e-153	2.71277e-149
	RAP1B	CD8.05	0.814	0.66	0.414668	1.40546e-192	3.21261e-188
	CD99	CD8.05	0.933	0.799	0.412165	3.00444e-228	6.86755e-224
	OSTF1	CD8.05	0.52	0.354	0.411989	5.09658e-139	1.16498e-134
	ITGB7	CD8.05	0.488	0.337	0.411038	4.35837e-121	9.96236e-117
	UBE2F	CD8.05	0.314	0.168	0.410432	2.19249e-148	5.0116e-144
	NDUFB7	CD8.05	0.605	0.439	0.408123	1.72409e-144	3.94092e-140
	MYO1G	CD8.05	0.533	0.365	0.407906	3.48674e-131	7.96998e-127
	RAC2	CD8.05	0.931	0.84	0.406214	7.30743e-213	1.67033e-208
	PTPN6	CD8.05	0.464	0.325	0.405859	1.19365e-105	2.72844e-101
	ARPC4	CD8.05	0.553	0.398	0.405028	7.70888e-129	1.7621e-124
	MSN	CD8.05	0.677	0.527	0.404872	2.46526e-133	5.63509e-129
	ADRB2	CD8.05	0.283	0.138	0.40392	5.13441e-154	1.17362e-149
	RAP2A	CD8.05	0.213	0.085	0.40383	1.63438e-177	3.73586e-173
	TRGV9	CD8.05	0.105	0.051	0.403213	3.95898e-55	9.04943e-51
	PTPN18	CD8.05	0.304	0.17	0.40288	7.56253e-129	1.72864e-124
	FMNL1	CD8.05	0.468	0.317	0.401014	1.75787e-121	4.01815e-117
	SUN2	CD8.05	0.686	0.546	0.39835	2.27561e-127	5.20159e-123
	JAZF1	CD8.05	0.236	0.103	0.397402	2.41094e-168	5.51092e-164
	CSK	CD8.05	0.555	0.404	0.395931	7.04559e-122	1.61048e-117
	PIP4K2A	CD8.05	0.472	0.321	0.394906	4.72415e-120	1.07985e-115
	VASP	CD8.05	0.391	0.249	0.394655	5.9142e-118	1.35187e-113
	IQGAP1	CD8.05	0.528	0.359	0.394622	7.51018e-137	1.71668e-132
	AGTRAP	CD8.05	0.341	0.192	0.391549	4.39036e-135	1.00355e-130
	MAPK1	CD8.05	0.355	0.207	0.390597	8.03449e-134	1.83652e-129
	TNFSF12	CD8.05	0.318	0.188	0.390375	1.80436e-115	4.1244e-111
	MAPRE2	CD8.05	0.412	0.273	0.390228	1.28022e-108	2.92632e-104
	GSTP1	CD8.05	0.72	0.573	0.389222	2.58125e-136	5.90022e-132
	LGR6	CD8.05	0.167	0.052	0.388157	1.97299e-213	4.50986e-209
	LYN	CD8.05	0.135	0.028	0.387084	1.74159e-276	3.98092e-272
	C5orf56	CD8.05	0.34	0.206	0.38656	1.79358e-112	4.09976e-108
	DBI	CD8.05	0.667	0.503	0.386471	2.22727e-143	5.09109e-139
	RPS6KA1	CD8.05	0.325	0.186	0.385266	9.83851e-127	2.24889e-122
	ITGAL	CD8.05	0.442	0.285	0.383375	4.69179e-125	1.07245e-120
	WDR1	CD8.05	0.6	0.446	0.382178	2.70335e-120	6.17931e-116
	TRG-AS1	CD8.05	0.362	0.237	0.381743	3.9009e-93	8.91667e-89
	PSMB10	CD8.05	0.642	0.487	0.379402	5.81075e-128	1.32822e-123
	CISD3	CD8.05	0.343	0.207	0.379286	1.80031e-116	4.11514e-112
	ACTN4	CD8.05	0.367	0.222	0.378059	2.02095e-120	4.61948e-116
	BLOC1S1	CD8.05	0.565	0.414	0.373841	1.36147e-115	3.11205e-111
	C12orf75	CD8.05	0.66	0.455	0.373821	8.54138e-157	1.95239e-152
	RNPEPL1	CD8.05	0.429	0.297	0.373416	1.84836e-99	4.22498e-95
	TSEN54	CD8.05	0.424	0.273	0.372373	2.21545e-119	5.06408e-115
	TBC1D10C	CD8.05	0.681	0.541	0.372223	3.74729e-122	8.56556e-118
	CAP1	CD8.05	0.697	0.557	0.372095	2.63029e-123	6.01232e-119
	MCTP2	CD8.05	0.23	0.105	0.371405	1.25668e-147	2.87253e-143
	PLEKHF1	CD8.05	0.244	0.119	0.368793	7.39286e-132	1.68986e-127
	UCP2	CD8.05	0.73	0.595	0.36686	4.08325e-119	9.33348e-115
	AC092821.3	CD8.05	0.134	0.055	0.365441	2.02952e-106	4.63908e-102
	FAM49B	CD8.05	0.52	0.37	0.364977	1.97205e-111	4.5077e-107
	KLRC1	CD8.05	0.095	0.039	0.36471	9.27719e-73	2.12058e-68
	ACTR3	CD8.05	0.66	0.51	0.364643	9.89193e-122	2.2611e-117
	KLF2	CD8.05	0.922	0.831	0.364461	2.221e-155	5.07677e-151
	AC004687.1	CD8.05	0.33	0.204	0.364109	3.13506e-100	7.16613e-96
	IFITM3	CD8.05	0.414	0.293	0.363984	3.15881e-78	7.22042e-74
	RAC1	CD8.05	0.573	0.427	0.363973	1.03619e-111	2.36853e-107
	CD53	CD8.05	0.681	0.533	0.363559	4.09056e-125	9.35021e-121
	CD3G	CD8.05	0.812	0.706	0.363084	2.76382e-132	6.31754e-128
	AKR1C3	CD8.05	0.117	0.031	0.362853	2.19366e-181	5.01427e-177
	LILRB1	CD8.05	0.193	0.073	0.361809	3.26872e-174	7.47165e-170
	HIST1H1E	CD8.05	0.693	0.556	0.361694	6.83946e-85	1.56336e-80
	ATP2B4	CD8.05	0.343	0.203	0.360435	4.12067e-118	9.41903e-114
	F2R	CD8.05	0.259	0.133	0.359147	3.33552e-124	7.62433e-120
	SYNE1	CD8.05	0.53	0.368	0.358498	2.97268e-116	6.79495e-112
	TRGC1	CD8.05	0.134	0.044	0.356457	5.13489e-157	1.17373e-152
	PLAAT3	CD8.05	0.245	0.127	0.35589	1.37618e-118	3.14568e-114
	YPEL3	CD8.05	0.619	0.475	0.355718	4.98584e-103	1.13966e-98
	LCP1	CD8.05	0.821	0.686	0.355096	7.1981e-134	1.64534e-129
	IQGAP2	CD8.05	0.413	0.277	0.353499	2.22641e-98	5.08912e-94
	KLRK1	CD8.05	0.681	0.551	0.353054	2.90492e-101	6.64007e-97
	CD164	CD8.05	0.476	0.336	0.351798	7.57061e-103	1.73049e-98
	ARL6IP1	CD8.05	0.609	0.471	0.351404	1.45736e-103	3.33123e-99
	PXN	CD8.05	0.356	0.225	0.350888	9.68468e-99	2.21372e-94
	CCL4	CD8.05	0.588	0.372	0.35067	1.92335e-144	4.3964e-140
	CTBP2	CD8.05	0.112	0.019	0.349172	1.46156e-278	3.34084e-274
	SSBP3	CD8.05	0.253	0.141	0.348268	1.00777e-101	2.30357e-97
	SAMD3	CD8.05	0.526	0.35	0.348189	4.78707e-129	1.09423e-124
	OSBPL5	CD8.05	0.15	0.047	0.348013	6.92893e-186	1.58381e-181
	GZMM	CD8.05	0.844	0.706	0.346877	1.20355e-149	2.75108e-145
	TLE5	CD8.05	0.841	0.734	0.346825	2.51554e-116	5.75003e-112
	LAIR1	CD8.05	0.236	0.121	0.345952	1.03929e-115	2.37561e-111
	CHST12	CD8.05	0.377	0.235	0.344237	1.47494e-106	3.37141e-102
	HCST	CD8.05	0.969	0.918	0.343036	1.26691e-182	2.89591e-178
	CD244	CD8.05	0.202	0.087	0.342277	5.06462e-143	1.15767e-138
	CD320	CD8.05	0.317	0.192	0.341691	9.28146e-99	2.12155e-94
	STK10	CD8.05	0.437	0.304	0.341551	1.49005e-94	3.40595e-90
	BTN3A2	CD8.05	0.434	0.305	0.341454	1.04843e-90	2.39651e-86
	SYNE2	CD8.05	0.682	0.525	0.339975	1.7417e-110	3.98117e-106
	ADD1	CD8.05	0.354	0.237	0.339475	1.64405e-84	3.75796e-80
	CRIP1	CD8.05	0.835	0.705	0.338841	2.42457e-123	5.54207e-119
	FBXW5	CD8.05	0.433	0.304	0.338529	6.31608e-88	1.44373e-83
	CCL4L2	CD8.05	0.193	0.092	0.338393	1.85469e-107	4.23946e-103
	PRR5	CD8.05	0.299	0.191	0.336972	2.63732e-81	6.02837e-77
	PTP4A2	CD8.05	0.787	0.631	0.336893	4.18459e-134	9.56514e-130
	PSAP	CD8.05	0.516	0.387	0.336431	1.3313e-89	3.0431e-85
	RNASEK	CD8.05	0.727	0.599	0.336409	7.5854e-106	1.73387e-101
	SLAMF7	CD8.05	0.268	0.143	0.335886	3.96294e-116	9.05848e-112
	RHOA	CD8.05	0.886	0.791	0.335418	1.22689e-146	2.80442e-142
	LMAN2	CD8.05	0.488	0.354	0.334375	4.40108e-95	1.006e-90
	SYTL1	CD8.05	0.49	0.364	0.333739	7.86331e-85	1.79739e-80
	CDC42	CD8.05	0.761	0.639	0.333585	8.57057e-113	1.95906e-108
	RASAL3	CD8.05	0.502	0.383	0.332619	9.72442e-79	2.22281e-74
	PIK3AP1	CD8.05	0.133	0.039	0.331752	3.84011e-178	8.77771e-174
	ARL6IP5	CD8.05	0.809	0.679	0.331739	2.65919e-131	6.07837e-127
	MACF1	CD8.05	0.446	0.316	0.331587	2.19044e-87	5.00692e-83
	TAF10	CD8.05	0.547	0.421	0.331335	4.38305e-80	1.00188e-75
	TPM3	CD8.05	0.872	0.773	0.330763	1.5229e-135	3.48104e-131
	LLGL2	CD8.05	0.205	0.099	0.33068	1.86662e-116	4.26672e-112
	VAV3	CD8.05	0.206	0.097	0.329355	5.43849e-122	1.24313e-117
	ARHGAP25	CD8.05	0.36	0.236	0.328937	1.39302e-87	3.18416e-83
	S100A4	CD8.05	0.983	0.9	0.32852	1.39961e-171	3.19922e-167
	SH2D1B	CD8.05	0.061	0.002	0.328485	0	0
	PABPN1	CD8.05	0.499	0.375	0.327479	1.64432e-81	3.75858e-77
	MYL6	CD8.05	0.965	0.908	0.327002	2.50165e-195	5.71827e-191
	IGFBP7	CD8.05	0.06	0.003	0.326844	0	0
	IRF1	CD8.05	0.561	0.422	0.326342	9.7448e-91	2.22747e-86
	TPI1	CD8.05	0.689	0.562	0.326024	3.0547e-99	6.98244e-95
	SIPA1	CD8.05	0.343	0.232	0.323585	7.42478e-77	1.69716e-72
	CDKN2D	CD8.05	0.445	0.317	0.323173	1.19615e-84	2.73416e-80
	PAXX	CD8.05	0.708	0.575	0.32199	1.68719e-100	3.85657e-96
	BSG	CD8.05	0.571	0.433	0.321445	5.67753e-96	1.29777e-91
	PTPN4	CD8.05	0.392	0.273	0.321334	2.75531e-81	6.29809e-77
	VAMP8	CD8.05	0.591	0.455	0.321201	1.29477e-98	2.95959e-94
	ARF6	CD8.05	0.607	0.467	0.319602	9.37483e-97	2.1429e-92
	ARPC5	CD8.05	0.645	0.513	0.319484	1.34853e-94	3.08247e-90
	GNB2	CD8.05	0.585	0.454	0.318505	2.06715e-90	4.72509e-86
	RASSF4	CD8.05	0.106	0.02	0.316879	7.53724e-239	1.72286e-234
	YWHAZ	CD8.05	0.906	0.809	0.316717	1.70524e-140	3.89784e-136
	GK5	CD8.05	0.189	0.085	0.31612	4.7215e-122	1.07924e-117
	HSPA5	CD8.05	0.629	0.515	0.316087	2.79167e-73	6.38119e-69
	XCL2	CD8.05	0.226	0.12	0.315701	5.70389e-95	1.3038e-90
	CTBP1	CD8.05	0.331	0.222	0.315575	4.87821e-75	1.11506e-70
	HSP90B1	CD8.05	0.726	0.606	0.315543	8.62754e-92	1.97208e-87
	ACADVL	CD8.05	0.373	0.263	0.31354	1.05198e-73	2.40462e-69
	RAB1B	CD8.05	0.397	0.276	0.313125	8.88216e-81	2.03028e-76
	LAMP1	CD8.05	0.466	0.342	0.31214	8.07078e-81	1.84482e-76
	TRGC2	CD8.05	0.182	0.085	0.312056	5.50236e-107	1.25773e-102
	PRKCB	CD8.05	0.423	0.307	0.311883	1.68538e-73	3.85245e-69
	GPR141	CD8.05	0.14	0.047	0.311112	5.93381e-153	1.35635e-148
	STARD3NL	CD8.05	0.199	0.108	0.311032	1.57707e-82	3.60486e-78
	EMP3	CD8.05	0.906	0.807	0.310997	4.84068e-133	1.10648e-128
	DGKZ	CD8.05	0.434	0.321	0.310765	8.03257e-72	1.83609e-67
	FCRL3	CD8.05	0.181	0.086	0.309305	2.34606e-103	5.36262e-99
	FERMT3	CD8.05	0.41	0.29	0.30908	7.48985e-77	1.71203e-72
	DDOST	CD8.05	0.545	0.416	0.307913	9.00369e-85	2.05806e-80
	CYB561D2	CD8.05	0.297	0.184	0.307684	1.35318e-84	3.0931e-80
	HMOX2	CD8.05	0.418	0.294	0.307415	4.14049e-83	9.46433e-79
	KIR2DL1	CD8.05	0.059	0.003	0.307341	1.02963e-303	2.35352e-299
	FUT11	CD8.05	0.194	0.093	0.306896	6.50192e-108	1.48621e-103
	MFSD10	CD8.05	0.437	0.315	0.305334	8.84077e-76	2.02082e-71
	ARHGAP30	CD8.05	0.434	0.323	0.304458	1.25516e-66	2.86903e-62
	SERPINB6	CD8.05	0.272	0.165	0.303687	4.27878e-83	9.78043e-79
	NDUFB2	CD8.05	0.667	0.557	0.303629	2.5211e-78	5.76273e-74
	RALGDS	CD8.05	0.253	0.15	0.303404	2.9855e-83	6.82426e-79
	RAB5IF	CD8.05	0.409	0.287	0.30332	3.50292e-76	8.00698e-72
	APOBEC3C	CD8.05	0.256	0.148	0.303299	2.43361e-88	5.56274e-84
	SELPLG	CD8.05	0.573	0.453	0.302051	7.98778e-75	1.82585e-70
	MAP2K2	CD8.05	0.449	0.331	0.301419	5.52717e-72	1.2634e-67
	USP28	CD8.05	0.204	0.101	0.301102	2.25128e-103	5.14597e-99
	KIAA2013	CD8.05	0.204	0.108	0.300858	1.30644e-90	2.98626e-86
	SIGIRR	CD8.05	0.515	0.401	0.299834	1.15815e-70	2.64731e-66
	MIDN	CD8.05	0.235	0.135	0.299729	3.02316e-84	6.91034e-80
	AHNAK	CD8.05	0.745	0.588	0.298919	3.69119e-102	8.43731e-98
	RAP2B	CD8.05	0.267	0.169	0.29817	2.30526e-70	5.26936e-66
	ADAM10	CD8.05	0.287	0.181	0.298103	1.05582e-77	2.41338e-73
	GRK2	CD8.05	0.374	0.27	0.296889	9.10474e-63	2.08116e-58
	UBE2V1	CD8.05	0.475	0.373	0.296826	5.2234e-61	1.19397e-56
	TOX	CD8.05	0.202	0.102	0.296594	1.10674e-97	2.52978e-93
	MIEN1	CD8.05	0.377	0.257	0.296521	8.68174e-78	1.98447e-73
	CD8A	CD8.05	0.878	0.795	0.295928	2.61535e-106	5.97816e-102
	RALY	CD8.05	0.556	0.424	0.295206	1.87875e-81	4.29445e-77
	TRAPPC10	CD8.05	0.277	0.178	0.295181	8.33884e-70	1.90609e-65
	TMED9	CD8.05	0.412	0.295	0.292316	2.49443e-74	5.70176e-70
	TUBB	CD8.05	0.514	0.393	0.292264	2.31046e-75	5.28125e-71
	SH3BP5	CD8.05	0.339	0.222	0.292092	4.87252e-77	1.11376e-72
	RGS19	CD8.05	0.388	0.274	0.291679	1.00677e-70	2.30128e-66
	RAB8B	CD8.05	0.235	0.14	0.291521	1.42363e-74	3.25414e-70
	SCP2	CD8.05	0.464	0.332	0.291412	1.0232e-84	2.33884e-80
	TAP1	CD8.05	0.466	0.344	0.290591	3.78758e-72	8.65765e-68
	PRDX5	CD8.05	0.47	0.361	0.289187	2.19201e-66	5.01049e-62
	GNG5	CD8.05	0.586	0.455	0.288062	1.35061e-81	3.08723e-77
	DNAJC1	CD8.05	0.378	0.256	0.287782	5.98891e-77	1.36894e-72
	PYCARD	CD8.05	0.336	0.23	0.287304	3.39436e-67	7.75884e-63
	SRSF9	CD8.05	0.557	0.438	0.287101	1.69509e-73	3.87465e-69
	PTPRE	CD8.05	0.236	0.136	0.287075	6.57055e-80	1.5019e-75
	CTDNEP1	CD8.05	0.358	0.26	0.286534	2.00324e-59	4.57901e-55
	NDUFC2	CD8.05	0.513	0.398	0.285705	2.704e-69	6.1808e-65
	HDDC2	CD8.05	0.328	0.221	0.284949	5.18691e-71	1.18562e-66
	DIAPH1	CD8.05	0.386	0.271	0.284799	5.31442e-71	1.21477e-66
	CAPN2	CD8.05	0.465	0.35	0.28476	1.02084e-67	2.33345e-63
	TADA3	CD8.05	0.321	0.224	0.284577	1.60558e-59	3.67003e-55
	MXD4	CD8.05	0.258	0.161	0.283921	7.53975e-70	1.72344e-65
	MYL12B	CD8.05	0.914	0.835	0.283837	2.40182e-134	5.49009e-130
	CORO1A	CD8.05	0.929	0.878	0.283828	2.81115e-102	6.42574e-98
	CTDSP1	CD8.05	0.353	0.255	0.28334	4.6398e-58	1.06057e-53
	PGAM1	CD8.05	0.562	0.438	0.283053	3.77925e-76	8.6386e-72
	TMBIM6	CD8.05	0.722	0.609	0.282529	1.10262e-84	2.52037e-80
	VCL	CD8.05	0.219	0.118	0.282192	2.63163e-91	6.01537e-87
	GNB1	CD8.05	0.369	0.266	0.282052	1.75873e-63	4.02011e-59
	PSMB9	CD8.05	0.786	0.665	0.2816	4.33026e-97	9.8981e-93
	TCIRG1	CD8.05	0.263	0.165	0.281545	1.19067e-70	2.72162e-66
	SH3BP2	CD8.05	0.17	0.085	0.280547	6.70002e-88	1.53149e-83
	ANXA4	CD8.05	0.186	0.09	0.280463	9.22388e-100	2.10839e-95
	TBCB	CD8.05	0.507	0.38	0.28046	3.08877e-76	7.0603e-72
	LAT2	CD8.05	0.075	0.004	0.279686	0	0
	SYT11	CD8.05	0.187	0.099	0.27932	4.0832e-81	9.33337e-77
	MTPN	CD8.05	0.426	0.317	0.277985	2.58942e-65	5.91889e-61
	CDC42SE1	CD8.05	0.457	0.352	0.277899	5.56446e-59	1.27192e-54
	SYTL3	CD8.05	0.365	0.245	0.277211	1.85762e-74	4.24615e-70
	MAP2K3	CD8.05	0.24	0.143	0.276948	5.5529e-76	1.26928e-71
	HMGN3	CD8.05	0.537	0.42	0.276748	1.94606e-70	4.44831e-66
	NFATC3	CD8.05	0.307	0.21	0.276682	3.66905e-63	8.38671e-59
	DSTN	CD8.05	0.471	0.35	0.276312	1.65305e-68	3.77855e-64
	FAM117A	CD8.05	0.302	0.213	0.276231	2.08899e-53	4.77501e-49
	TFDP2	CD8.05	0.248	0.155	0.275843	2.4166e-67	5.52387e-63
	PPP2R5A	CD8.05	0.25	0.159	0.275724	2.56822e-64	5.87043e-60
	TPM4	CD8.05	0.252	0.161	0.275684	8.2128e-62	1.87728e-57
	PTPRC	CD8.05	0.976	0.922	0.275614	2.25603e-163	5.15683e-159
	UBB	CD8.05	0.87	0.78	0.274744	8.74594e-99	1.99915e-94
	DYNLL1	CD8.05	0.408	0.285	0.274624	3.53224e-73	8.07399e-69
	HCLS1	CD8.05	0.734	0.635	0.274272	1.59064e-77	3.63589e-73
	PPP2R5C	CD8.05	0.618	0.485	0.27402	1.61727e-75	3.69676e-71
	RAB29	CD8.05	0.343	0.231	0.273744	7.74356e-72	1.77002e-67
	LYST	CD8.05	0.279	0.185	0.273439	5.83743e-61	1.33432e-56
	TSPAN32	CD8.05	0.259	0.175	0.27319	3.03552e-54	6.93859e-50
	GPS2	CD8.05	0.461	0.352	0.272537	6.54477e-63	1.496e-58
	ACAA2	CD8.05	0.31	0.213	0.272529	2.38126e-60	5.44309e-56
	XBP1	CD8.05	0.485	0.389	0.272378	6.64871e-51	1.51976e-46
	RNF166	CD8.05	0.366	0.265	0.271623	2.55827e-58	5.8477e-54
	ARPC1B	CD8.05	0.796	0.697	0.271522	4.42062e-82	1.01047e-77
	BATF	CD8.05	0.258	0.16	0.271314	1.16305e-68	2.65849e-64
	P4HB	CD8.05	0.518	0.411	0.271035	4.45773e-64	1.01895e-59
	PTPRA	CD8.05	0.325	0.226	0.270743	5.05252e-61	1.1549e-56
	SKAP1	CD8.05	0.547	0.439	0.27046	2.58336e-62	5.90503e-58
	LRP10	CD8.05	0.331	0.242	0.270098	3.54794e-50	8.10989e-46
	AKT1	CD8.05	0.227	0.143	0.269579	8.13257e-60	1.85894e-55
	ACTR2	CD8.05	0.53	0.419	0.26933	2.4444e-66	5.58742e-62
	AKNA	CD8.05	0.435	0.335	0.269258	9.84596e-55	2.25059e-50
	GAB3	CD8.05	0.199	0.108	0.268911	1.16231e-80	2.65681e-76
	PDLIM2	CD8.05	0.355	0.25	0.268307	3.52346e-62	8.05392e-58
	PTPN22	CD8.05	0.302	0.194	0.268104	1.20207e-71	2.7477e-67
	FHL3	CD8.05	0.113	0.04	0.265987	7.24347e-117	1.65571e-112
	CYFIP2	CD8.05	0.476	0.377	0.265927	2.58032e-56	5.89809e-52
	VCP	CD8.05	0.471	0.368	0.265347	1.69301e-57	3.86988e-53
	JAK1	CD8.05	0.777	0.679	0.2653	8.69707e-77	1.98798e-72
	LINC02384	CD8.05	0.126	0.05	0.265202	2.92424e-103	6.68422e-99
	STOM	CD8.05	0.322	0.212	0.264985	1.36968e-70	3.13081e-66
	CXCR2	CD8.05	0.079	0.011	0.264467	1.59338e-229	3.64215e-225
	C11orf21	CD8.05	0.176	0.096	0.264451	1.13953e-71	2.60473e-67
	PRR5L	CD8.05	0.172	0.085	0.264437	2.9222e-85	6.67957e-81
	HNRNPUL2	CD8.05	0.281	0.195	0.264042	1.47202e-53	3.36475e-49
	APLP2	CD8.05	0.191	0.104	0.263809	1.4478e-74	3.30939e-70
	CMKLR1	CD8.05	0.097	0.023	0.263063	3.99708e-169	9.13654e-165
	PTMS	CD8.05	0.22	0.129	0.26291	9.88985e-67	2.26062e-62
	RGS3	CD8.05	0.165	0.079	0.262903	3.49933e-92	7.99876e-88
	PTPN7	CD8.05	0.249	0.158	0.262641	1.36516e-61	3.12047e-57
	USB1	CD8.05	0.206	0.117	0.26142	1.53236e-72	3.50267e-68
	ALYREF	CD8.05	0.307	0.213	0.261262	2.90728e-58	6.64546e-54
	SIRT2	CD8.05	0.229	0.136	0.261076	6.80772e-71	1.55611e-66
	OPTN	CD8.05	0.44	0.327	0.258859	1.17713e-62	2.69068e-58
	LNPEP	CD8.05	0.378	0.278	0.258847	2.15858e-56	4.93408e-52
	ZNF600	CD8.05	0.151	0.069	0.258762	3.22008e-92	7.36046e-88
	S100A11	CD8.05	0.581	0.445	0.258632	9.43016e-73	2.15555e-68
	SLC25A20	CD8.05	0.178	0.095	0.258513	3.00118e-75	6.86011e-71
	HLA-DPB1	CD8.05	0.701	0.537	0.257711	4.35009e-91	9.94343e-87
	PPP2R2B	CD8.05	0.206	0.117	0.257329	1.27354e-72	2.91107e-68
	GLIPR2	CD8.05	0.25	0.165	0.257258	3.38044e-53	7.72702e-49
	PSMB8	CD8.05	0.648	0.53	0.257093	8.36236e-69	1.91147e-64
	PLEKHG3	CD8.05	0.128	0.053	0.256386	1.02557e-97	2.34426e-93
	CCDC92	CD8.05	0.188	0.108	0.256276	8.11248e-66	1.85435e-61
	MAP7D1	CD8.05	0.268	0.189	0.255814	1.85416e-48	4.23824e-44
	PLOD1	CD8.05	0.116	0.04	0.255713	8.68606e-119	1.98546e-114
	YWHAH	CD8.05	0.264	0.175	0.255014	5.51882e-57	1.26149e-52
	SKAP2	CD8.05	0.156	0.073	0.255013	2.50821e-91	5.73326e-87
	SQSTM1	CD8.05	0.474	0.377	0.25494	4.15994e-53	9.50879e-49
	SERPINB1	CD8.05	0.422	0.325	0.254669	1.32172e-52	3.0212e-48
	COMMD7	CD8.05	0.316	0.224	0.254615	6.79186e-53	1.55248e-48
	IDH2	CD8.05	0.388	0.277	0.253314	5.76893e-63	1.31866e-58
	TUBA1B	CD8.05	0.565	0.432	0.253166	4.15304e-81	9.49302e-77
	ORAI1	CD8.05	0.401	0.299	0.252939	1.48225e-55	3.38813e-51
	RGS9	CD8.05	0.13	0.053	0.25256	1.75726e-101	4.01674e-97
	IKBKG	CD8.05	0.198	0.117	0.252169	1.91377e-62	4.3745e-58
	CDC42EP3	CD8.05	0.326	0.225	0.251607	3.18184e-58	7.27304e-54
	RNF213	CD8.05	0.646	0.535	0.251557	1.11119e-63	2.53996e-59
	MAD2L2	CD8.05	0.227	0.146	0.2513	6.51308e-54	1.48876e-49
	GTF3C1	CD8.05	0.201	0.123	0.251111	1.25843e-56	2.87652e-52
	RAP1GAP2	CD8.05	0.164	0.084	0.251094	2.32256e-77	5.30891e-73
	PPP6R1	CD8.05	0.275	0.195	0.250534	7.11185e-48	1.62563e-43
	CNPPD1	CD8.05	0.295	0.203	0.250373	2.18647e-55	4.99783e-51
	TACC1	CD8.05	0.265	0.178	0.250179	2.64268e-55	6.04065e-51
	LTB	CD8.06	0.924	0.422	1.64073	0	0
	IL7R	CD8.06	0.946	0.469	1.42339	0	0
	FOS	CD8.06	0.731	0.443	1.41641	0	0
	JUNB	CD8.06	0.905	0.806	1.05328	0	0
	NELL2	CD8.06	0.499	0.156	0.937553	0	0
	JUN	CD8.06	0.744	0.58	0.929164	2.10713e-192	4.81647e-188
	FXYD2	CD8.06	0.247	0.022	0.911056	0	0
	ARHGAP15	CD8.06	0.647	0.354	0.797037	0	0
	TCF7	CD8.06	0.659	0.325	0.790156	0	0
	RCAN3	CD8.06	0.402	0.123	0.735204	0	0
	NOSIP	CD8.06	0.666	0.382	0.731933	9.38768e-279	2.14584e-274
	PLP2	CD8.06	0.555	0.27	0.731057	6.39392e-293	1.46152e-288
	TNFAIP3	CD8.06	0.666	0.418	0.728493	6.60259e-209	1.50922e-204
	RGCC	CD8.06	0.281	0.104	0.695449	6.5334e-221	1.4934e-216
	LDHB	CD8.06	0.912	0.677	0.691695	0	0
	COTL1	CD8.06	0.717	0.378	0.664963	0	0
	AQP3	CD8.06	0.333	0.106	0.656245	0	0
	ZFP36L2	CD8.06	0.944	0.867	0.650147	1.23533e-228	2.82372e-224
	MAL	CD8.06	0.332	0.105	0.648022	0	0
	ITM2C	CD8.06	0.251	0.053	0.6393	0	0
	PABPC1	CD8.06	0.949	0.855	0.635428	0	0
	CAMK4	CD8.06	0.487	0.224	0.634798	4.40869e-259	1.00774e-254
	DUSP1	CD8.06	0.771	0.597	0.590548	3.83118e-157	8.75732e-153
	TMEM123	CD8.06	0.569	0.316	0.569125	1.33069e-204	3.04169e-200
	NFKBIA	CD8.06	0.753	0.55	0.565281	7.68351e-157	1.7563e-152
	LEPROTL1	CD8.06	0.703	0.474	0.551544	2.87571e-166	6.57329e-162
	FLT3LG	CD8.06	0.574	0.341	0.540164	5.54359e-169	1.26715e-164
	TRADD	CD8.06	0.404	0.205	0.527416	2.96113e-164	6.76856e-160
	LEF1	CD8.06	0.409	0.191	0.514807	5.10161e-187	1.16613e-182
	PAG1	CD8.06	0.294	0.114	0.512617	8.10022e-205	1.85155e-200
	SARAF	CD8.06	0.964	0.87	0.507969	4.33179e-241	9.90161e-237
	VIM	CD8.06	0.953	0.871	0.500639	3.18186e-205	7.2731e-201
	LGALS3	CD8.06	0.172	0.043	0.49021	3.76061e-228	8.59601e-224
	CXCR3	CD8.06	0.318	0.139	0.479187	9.30529e-167	2.127e-162
	TIMP1	CD8.06	0.323	0.145	0.474345	2.57573e-163	5.88761e-159
	CCR7	CD8.06	0.359	0.148	0.449162	4.21814e-204	9.64182e-200
	PASK	CD8.06	0.242	0.104	0.445343	2.77759e-133	6.34902e-129
	INPP4B	CD8.06	0.327	0.167	0.444585	1.50851e-121	3.44814e-117
	SELL	CD8.06	0.479	0.311	0.443411	2.21731e-88	5.06832e-84
	SERINC5	CD8.06	0.231	0.076	0.438933	6.17412e-208	1.41128e-203
	ARMH1	CD8.06	0.222	0.081	0.436129	4.98414e-170	1.13927e-165
	CD27	CD8.06	0.557	0.335	0.433487	1.7068e-132	3.90141e-128
	PIK3IP1	CD8.06	0.445	0.259	0.429462	8.90243e-114	2.03492e-109
	NSG1	CD8.06	0.217	0.082	0.422617	4.45587e-152	1.01852e-147
	GPR183	CD8.06	0.191	0.074	0.420684	5.78642e-124	1.32266e-119
	NPDC1	CD8.06	0.209	0.075	0.417253	2.57895e-162	5.89497e-158
	UBXN11	CD8.06	0.201	0.077	0.413408	3.04721e-136	6.96532e-132
	TNFSF8	CD8.06	0.205	0.071	0.411188	4.23179e-170	9.67302e-166
	LSR	CD8.06	0.207	0.065	0.408067	8.46433e-199	1.93478e-194
	CLDND1	CD8.06	0.436	0.277	0.403577	1.61749e-82	3.69727e-78
	PCSK1N	CD8.06	0.167	0.051	0.402859	7.52938e-168	1.72107e-163
	LYAR	CD8.06	0.615	0.465	0.396939	2.7822e-70	6.35956e-66
	CTSA	CD8.06	0.287	0.152	0.396653	1.23491e-93	2.82276e-89
	BIRC3	CD8.06	0.211	0.075	0.396438	2.30899e-163	5.27788e-159
	BCL2	CD8.06	0.302	0.158	0.395511	1.20476e-102	2.75385e-98
	CD82	CD8.06	0.201	0.073	0.393696	9.95479e-150	2.27547e-145
	SOCS3	CD8.06	0.216	0.09	0.392304	1.86498e-122	4.26296e-118
	TMEM14C	CD8.06	0.223	0.081	0.391846	2.03914e-167	4.66106e-163
	SESN3	CD8.06	0.181	0.066	0.382158	1.13618e-132	2.59708e-128
	PIM1	CD8.06	0.436	0.281	0.380388	1.34203e-78	3.06761e-74
	FXYD5	CD8.06	0.936	0.844	0.379522	9.81704e-141	2.24398e-136
	DGKA	CD8.06	0.312	0.164	0.375903	4.02451e-102	9.19923e-98
	SNHG8	CD8.06	0.663	0.465	0.372261	9.81417e-100	2.24332e-95
	HINT1	CD8.06	0.951	0.855	0.370618	4.50813e-142	1.03047e-137
	FOSB	CD8.06	0.273	0.154	0.369778	4.47104e-73	1.02199e-68
	SPINT2	CD8.06	0.204	0.074	0.368293	7.61005e-156	1.7395e-151
	ZNF331	CD8.06	0.189	0.088	0.365587	4.00072e-84	9.14484e-80
	CD69	CD8.06	0.627	0.469	0.359586	3.55151e-67	8.11804e-63
	GADD45B	CD8.06	0.527	0.456	0.359319	1.77969e-23	4.068e-19
	TSC22D3	CD8.06	0.901	0.786	0.356785	1.3448e-86	3.07394e-82
	MGAT4A	CD8.06	0.564	0.401	0.356316	2.93153e-73	6.70089e-69
	AREG	CD8.06	0.142	0.048	0.353516	1.59155e-119	3.63797e-115
	SLC2A3	CD8.06	0.394	0.259	0.351046	7.0539e-64	1.61238e-59
	CDKN1B	CD8.06	0.474	0.328	0.350467	5.1471e-66	1.17652e-61
	TTC39C	CD8.06	0.387	0.233	0.34818	7.40884e-84	1.69351e-79
	SMDT1	CD8.06	0.628	0.468	0.342485	7.71052e-71	1.76247e-66
	MCUB	CD8.06	0.546	0.371	0.341793	8.08349e-78	1.84772e-73
	NR4A2	CD8.06	0.346	0.217	0.341144	7.01762e-64	1.60409e-59
	LDLRAP1	CD8.06	0.294	0.16	0.339722	3.18663e-87	7.28401e-83
	CDC14A	CD8.06	0.229	0.11	0.339638	1.47502e-94	3.3716e-90
	DPP4	CD8.06	0.133	0.033	0.33759	2.12668e-177	4.86116e-173
	CD55	CD8.06	0.343	0.204	0.334125	4.44976e-76	1.01713e-71
	RPL4	CD8.06	0.964	0.913	0.333899	1.57162e-131	3.59241e-127
	EEF2	CD8.06	0.943	0.891	0.331712	6.04456e-118	1.38167e-113
	GAS5	CD8.06	0.614	0.462	0.328498	5.29709e-65	1.21081e-60
	FAM102A	CD8.06	0.192	0.083	0.323824	1.94383e-102	4.4432e-98
	IFNG-AS1	CD8.06	0.121	0.031	0.323788	1.27931e-151	2.92425e-147
	FOXP1	CD8.06	0.505	0.353	0.318004	6.80077e-62	1.55452e-57
	TAB2	CD8.06	0.221	0.113	0.31768	1.66813e-76	3.81301e-72
	TAGAP	CD8.06	0.426	0.284	0.314729	1.26577e-60	2.89329e-56
	MYC	CD8.06	0.235	0.115	0.314222	8.05434e-91	1.84106e-86
	DNAJB1	CD8.06	0.667	0.544	0.312604	2.46928e-50	5.64428e-46
	GSTK1	CD8.06	0.782	0.654	0.311974	2.15018e-69	4.91488e-65
	SNHG29	CD8.06	0.743	0.626	0.311071	8.53376e-67	1.95065e-62
	ZFAS1	CD8.06	0.706	0.552	0.31015	7.42931e-65	1.69819e-60
	LINC02446	CD8.06	0.366	0.22	0.307565	1.37755e-71	3.1488e-67
	PPP1R15A	CD8.06	0.333	0.227	0.304227	2.35304e-42	5.37857e-38
	SNX9	CD8.06	0.155	0.061	0.300754	4.21895e-101	9.64367e-97
	PTGER2	CD8.06	0.39	0.266	0.298005	3.25664e-50	7.44403e-46
	CD28	CD8.06	0.155	0.059	0.293944	6.05215e-105	1.3834e-100
	NCF1	CD8.06	0.198	0.097	0.283007	1.29774e-75	2.96638e-71
	SUSD3	CD8.06	0.14	0.049	0.282583	2.77106e-112	6.33409e-108
	SNHG6	CD8.06	0.635	0.532	0.279525	1.19655e-36	2.73507e-32
	THEM4	CD8.06	0.269	0.152	0.279252	8.88662e-68	2.0313e-63
	CXCR4	CD8.06	0.754	0.634	0.279177	6.83335e-47	1.56197e-42
	TXK	CD8.06	0.186	0.082	0.273758	1.34797e-91	3.08119e-87
	TNFRSF25	CD8.06	0.141	0.048	0.271118	1.86323e-114	4.25897e-110
	STMN3	CD8.06	0.251	0.143	0.270711	4.19967e-60	9.59961e-56
	CAPG	CD8.06	0.112	0.026	0.269252	1.9482e-165	4.4532e-161
	NPM1	CD8.06	0.939	0.865	0.268956	8.24065e-98	1.88365e-93
	FBXL16	CD8.06	0.099	0.019	0.265583	2.97433e-175	6.79873e-171
	SCML4	CD8.06	0.291	0.174	0.262316	1.0879e-58	2.48673e-54
	BTG2	CD8.06	0.433	0.309	0.262136	4.47273e-44	1.02238e-39
	WDR86-AS1	CD8.06	0.087	0.014	0.261906	2.4273e-197	5.54832e-193
	CYLD	CD8.06	0.363	0.239	0.261805	2.46052e-51	5.62425e-47
	PDE4B	CD8.06	0.189	0.097	0.260525	1.26488e-61	2.89126e-57
	ZFP36	CD8.06	0.752	0.682	0.25496	8.045e-22	1.83893e-17
	SATB1	CD8.06	0.232	0.128	0.254892	2.00196e-62	4.57607e-58
	A1BG	CD8.06	0.226	0.13	0.254109	6.72129e-53	1.53635e-48
	NFKBIZ	CD8.06	0.235	0.143	0.253348	5.3357e-46	1.21963e-41
	IRS2	CD8.06	0.09	0.017	0.253119	7.41281e-165	1.69442e-160
	CRIP2	CD8.06	0.086	0.018	0.252757	4.32902e-140	9.89527e-136
	SYPL1	CD8.06	0.226	0.13	0.251558	5.60189e-54	1.28048e-49
	TESPA1	CD8.06	0.221	0.129	0.250494	7.72679e-49	1.76619e-44
	HLA-DRA	CD8.07	0.686	0.095	2.06921	0	0
	CD74	CD8.07	0.989	0.794	1.86369	0	0
	HLA-DRB1	CD8.07	0.866	0.348	1.64789	0	0
	COTL1	CD8.07	0.797	0.387	1.44299	0	0
	HLA-DRB5	CD8.07	0.598	0.168	1.37275	0	0
	GZMK	CD8.07	0.826	0.334	1.30408	0	0
	HLA-DQB1	CD8.07	0.45	0.078	1.18039	0	0
	HLA-DPA1	CD8.07	0.839	0.498	1.05149	0	0
	HLA-DQA1	CD8.07	0.35	0.059	1.00363	0	0
	DUSP2	CD8.07	0.82	0.559	0.873957	2.99933e-195	6.85587e-191
	HLA-DMA	CD8.07	0.404	0.111	0.851051	0	0
	HLA-DPB1	CD8.07	0.841	0.543	0.832506	1.30657e-252	2.98656e-248
	CNN2	CD8.07	0.758	0.555	0.794289	6.10499e-162	1.39548e-157
	CD27	CD8.07	0.551	0.344	0.76648	7.9819e-115	1.8245e-110
	ANXA5	CD8.07	0.527	0.273	0.708039	2.37295e-157	5.42409e-153
	CCL5	CD8.07	0.958	0.829	0.688003	5.31201e-241	1.21422e-236
	FABP5	CD8.07	0.312	0.083	0.677056	4.07938e-270	9.32464e-266
	LIME1	CD8.07	0.785	0.62	0.666645	3.21296e-137	7.34417e-133
	SH2D1A	CD8.07	0.49	0.235	0.659117	6.9935e-157	1.59857e-152
	PMAIP1	CD8.07	0.278	0.087	0.656386	5.09752e-187	1.16519e-182
	TNFAIP3	CD8.07	0.657	0.429	0.6218	1.83242e-113	4.18855e-109
	GZMA	CD8.07	0.937	0.707	0.618624	1.8787e-164	4.29434e-160
	CD69	CD8.07	0.687	0.472	0.617946	5.95186e-107	1.36048e-102
	CLDND1	CD8.07	0.472	0.281	0.602206	2.71744e-90	6.21153e-86
	IFNG	CD8.07	0.219	0.062	0.577641	1.11201e-168	2.54183e-164
	RGS1	CD8.07	0.214	0.053	0.555942	1.76711e-200	4.03927e-196
	CXCR3	CD8.07	0.346	0.144	0.554313	3.42426e-136	7.82716e-132
	IDH2	CD8.07	0.506	0.279	0.532997	4.04299e-110	9.24146e-106
	SUB1	CD8.07	0.854	0.703	0.523183	3.94342e-105	9.01387e-101
	CDCA7	CD8.07	0.176	0.013	0.521752	0	0
	LIMD2	CD8.07	0.86	0.764	0.505634	7.49728e-92	1.71373e-87
	IRF1	CD8.07	0.605	0.432	0.503389	1.75943e-56	4.02169e-52
	PSME2	CD8.07	0.726	0.551	0.496443	1.14808e-87	2.62427e-83
	JPT1	CD8.07	0.449	0.224	0.494315	1.91303e-115	4.37281e-111
	ARPC1B	CD8.07	0.828	0.703	0.494269	1.10468e-91	2.52507e-87
	ITM2A	CD8.07	0.51	0.34	0.490207	7.80639e-64	1.78438e-59
	HLA-DQA2	CD8.07	0.183	0.062	0.488018	4.47358e-103	1.02257e-98
	CORO1A	CD8.07	0.945	0.881	0.480706	8.65985e-124	1.97947e-119
	MT2A	CD8.07	0.73	0.569	0.480603	3.21077e-62	7.33917e-58
	LYST	CD8.07	0.376	0.187	0.467901	1.69085e-96	3.86494e-92
	GBP5	CD8.07	0.431	0.265	0.46695	1.72013e-62	3.93188e-58
	TTN	CD8.07	0.161	0.041	0.466627	5.42502e-144	1.24005e-139
	SAT1	CD8.07	0.567	0.401	0.461659	1.43677e-56	3.28417e-52
	CMC1	CD8.07	0.634	0.429	0.449765	1.76749e-70	4.04013e-66
	MT1E	CD8.07	0.257	0.118	0.449445	2.23709e-78	5.11355e-74
	ISG20	CD8.07	0.637	0.499	0.440717	6.70985e-50	1.53374e-45
	ANXA2	CD8.07	0.595	0.411	0.439913	3.06347e-61	7.00248e-57
	UBE2L6	CD8.07	0.496	0.318	0.438626	9.55046e-69	2.18304e-64
	MIR4435-2HG	CD8.07	0.276	0.108	0.434858	1.28278e-114	2.93217e-110
	UCP2	CD8.07	0.73	0.607	0.430906	2.43926e-49	5.57565e-45
	CLIC1	CD8.07	0.878	0.718	0.429587	2.18943e-92	5.00461e-88
	TENT5C	CD8.07	0.309	0.155	0.428794	1.02607e-75	2.34539e-71
	STAT1	CD8.07	0.34	0.198	0.427061	6.13179e-56	1.40161e-51
	LYAR	CD8.07	0.67	0.467	0.419567	1.98112e-70	4.52845e-66
	CYTOR	CD8.07	0.443	0.265	0.416291	1.30474e-64	2.98238e-60
	OPTN	CD8.07	0.524	0.331	0.410607	5.28296e-69	1.20758e-64
	MCUB	CD8.07	0.555	0.377	0.408619	2.54548e-61	5.81845e-57
	SLC25A5	CD8.07	0.625	0.496	0.407443	1.40773e-48	3.2178e-44
	HIST1H1C	CD8.07	0.383	0.241	0.40502	7.28737e-49	1.66575e-44
	SIRPG	CD8.07	0.253	0.12	0.404418	4.23293e-73	9.67563e-69
	PSMB9	CD8.07	0.807	0.674	0.400285	4.64271e-69	1.06123e-64
	TAP1	CD8.07	0.534	0.351	0.400207	1.16928e-64	2.67274e-60
	SLF1	CD8.07	0.242	0.098	0.398049	3.04699e-95	6.9648e-91
	CD2	CD8.07	0.762	0.605	0.397813	1.85733e-58	4.24547e-54
	PSMA4	CD8.07	0.371	0.204	0.397412	3.30056e-67	7.54442e-63
	PSME1	CD8.07	0.908	0.829	0.396169	4.96948e-85	1.13592e-80
	JUN	CD8.07	0.71	0.588	0.393783	2.95053e-36	6.74432e-32
	CHI3L2	CD8.07	0.149	0.037	0.393736	5.24773e-134	1.19953e-129
	LIMS1	CD8.07	0.222	0.092	0.393237	9.61736e-84	2.19834e-79
	HIST1H1D	CD8.07	0.464	0.364	0.3889	1.96345e-24	4.48805e-20
	ISG15	CD8.07	0.358	0.204	0.387436	5.46665e-60	1.24957e-55
	DUSP4	CD8.07	0.112	0.015	0.385903	3.66046e-208	8.36707e-204
	CD81	CD8.07	0.671	0.525	0.380095	1.2506e-46	2.85862e-42
	PPP1CA	CD8.07	0.797	0.651	0.379949	1.66691e-70	3.81022e-66
	SRGN	CD8.07	0.895	0.728	0.377699	4.99186e-79	1.14104e-74
	CD160	CD8.07	0.18	0.078	0.375468	1.32099e-60	3.01952e-56
	PLAAT4	CD8.07	0.734	0.636	0.3744	1.25423e-45	2.86692e-41
	TIGIT	CD8.07	0.355	0.202	0.37425	6.03132e-58	1.37864e-53
	GMFG	CD8.07	0.823	0.717	0.371083	4.95719e-63	1.13312e-58
	GBP1	CD8.07	0.23	0.119	0.363795	2.75863e-51	6.30567e-47
	FYB1	CD8.07	0.78	0.659	0.362235	2.27375e-49	5.19733e-45
	WIPF1	CD8.07	0.636	0.475	0.361019	1.58041e-51	3.6125e-47
	STK17A	CD8.07	0.673	0.521	0.357874	2.6507e-47	6.05898e-43
	HLA-DMB	CD8.07	0.127	0.022	0.357766	3.09946e-181	7.08475e-177
	ADA	CD8.07	0.235	0.099	0.357622	1.55093e-85	3.54512e-81
	MYL6	CD8.07	0.966	0.913	0.353727	3.77235e-96	8.62285e-92
	PIM3	CD8.07	0.278	0.143	0.351937	7.69202e-63	1.75824e-58
	GNAS	CD8.07	0.736	0.624	0.351866	4.27894e-45	9.78081e-41
	ATP5F1B	CD8.07	0.7	0.56	0.34871	1.65024e-49	3.77213e-45
	CCL4	CD8.07	0.524	0.394	0.348693	3.05576e-28	6.98485e-24
	TRAT1	CD8.07	0.264	0.121	0.348198	4.58026e-77	1.04696e-72
	APOBEC3G	CD8.07	0.514	0.337	0.348189	6.66191e-53	1.52278e-48
	SMC4	CD8.07	0.19	0.064	0.347686	4.16644e-106	9.52365e-102
	CAPZB	CD8.07	0.782	0.659	0.344299	1.32137e-55	3.02039e-51
	GSTK1	CD8.07	0.775	0.659	0.343465	1.66269e-43	3.80058e-39
	HDAC1	CD8.07	0.475	0.323	0.343145	1.5713e-46	3.59168e-42
	SAMHD1	CD8.07	0.596	0.45	0.339642	1.93253e-40	4.41737e-36
	PYCARD	CD8.07	0.388	0.236	0.338187	2.15759e-51	4.93183e-47
	PPP2R5C	CD8.07	0.675	0.493	0.33502	1.40285e-52	3.20664e-48
	PSMB8	CD8.07	0.667	0.54	0.334443	5.12319e-42	1.17106e-37
	EIF4A1	CD8.07	0.648	0.523	0.33303	1.68429e-38	3.84994e-34
	HERPUD1	CD8.07	0.505	0.361	0.329209	1.03346e-37	2.36228e-33
	LGALS3	CD8.07	0.127	0.051	0.327305	2.05529e-51	4.69798e-47
	PSMB2	CD8.07	0.373	0.219	0.327228	2.76052e-52	6.31e-48
	PIK3R1	CD8.07	0.598	0.444	0.326597	4.40949e-41	1.00792e-36
	SEPTIN6	CD8.07	0.539	0.411	0.326168	7.84248e-31	1.79264e-26
	NIN	CD8.07	0.353	0.211	0.325806	8.04265e-50	1.83839e-45
	MT1F	CD8.07	0.288	0.157	0.325595	2.95295e-52	6.74984e-48
	HMGB2	CD8.07	0.555	0.394	0.325463	2.88713e-42	6.59941e-38
	FKBP1A	CD8.07	0.465	0.309	0.325028	7.82653e-46	1.78899e-41
	ARPC3	CD8.07	0.883	0.804	0.324612	5.90306e-60	1.34932e-55
	DENND2D	CD8.07	0.43	0.314	0.32443	6.94527e-31	1.58755e-26
	ENC1	CD8.07	0.193	0.084	0.323469	3.12656e-63	7.14668e-59
	SIT1	CD8.07	0.354	0.213	0.321436	2.56888e-48	5.87194e-44
	GIMAP4	CD8.07	0.571	0.465	0.321315	1.26503e-27	2.8916e-23
	LCP1	CD8.07	0.835	0.697	0.321033	1.53539e-56	3.50959e-52
	MAP3K8	CD8.07	0.292	0.168	0.319965	2.53917e-45	5.80404e-41
	YBX3	CD8.07	0.243	0.134	0.319259	1.1227e-44	2.56628e-40
	ELOVL5	CD8.07	0.298	0.167	0.319135	1.38901e-50	3.17499e-46
	MAP4K1	CD8.07	0.352	0.2	0.318833	3.24638e-55	7.42058e-51
	ATP5F1C	CD8.07	0.521	0.382	0.316215	4.20024e-38	9.60091e-34
	GYPC	CD8.07	0.703	0.582	0.315395	9.52641e-37	2.17755e-32
	HMGB1	CD8.07	0.902	0.831	0.315342	4.752e-56	1.08621e-51
	PSMB3	CD8.07	0.543	0.389	0.314256	6.44838e-41	1.47397e-36
	FYN	CD8.07	0.693	0.539	0.314205	1.31204e-43	2.99907e-39
	ATP5MF	CD8.07	0.652	0.507	0.314204	1.97219e-41	4.50804e-37
	PHACTR2	CD8.07	0.227	0.107	0.312132	3.15993e-61	7.22296e-57
	RAC2	CD8.07	0.903	0.85	0.311085	7.96756e-50	1.82122e-45
	SEM1	CD8.07	0.484	0.331	0.310902	2.02794e-42	4.63546e-38
	NEAT1	CD8.07	0.476	0.347	0.310778	1.83257e-33	4.1889e-29
	ATG2A	CD8.07	0.229	0.107	0.310561	1.9128e-63	4.37228e-59
	CCDC167	CD8.07	0.287	0.15	0.310221	4.30896e-58	9.84943e-54
	NPDC1	CD8.07	0.169	0.082	0.308229	9.42784e-44	2.15501e-39
	GPR183	CD8.07	0.16	0.081	0.306033	1.18209e-36	2.70203e-32
	CLEC2B	CD8.07	0.697	0.545	0.305345	1.92109e-41	4.39123e-37
	LCK	CD8.07	0.811	0.719	0.303229	4.91976e-44	1.12456e-39
	FAM160B1	CD8.07	0.238	0.116	0.302923	8.28707e-59	1.89426e-54
	FAS	CD8.07	0.23	0.106	0.301531	5.87579e-65	1.34309e-60
	COX5A	CD8.07	0.589	0.446	0.301148	3.74114e-38	8.5515e-34
	LAG3	CD8.07	0.29	0.171	0.300231	1.07821e-40	2.46457e-36
	TXN	CD8.07	0.522	0.357	0.300034	4.5365e-43	1.03695e-38
	LGALS9	CD8.07	0.136	0.032	0.299884	3.93133e-133	8.98623e-129
	IER2	CD8.07	0.741	0.616	0.298033	2.17966e-29	4.98226e-25
	PPP1R18	CD8.07	0.591	0.44	0.294851	8.22827e-40	1.88082e-35
	B3GNT2	CD8.07	0.259	0.138	0.294371	6.27011e-51	1.43322e-46
	KLRG1	CD8.07	0.573	0.435	0.294319	1.11129e-31	2.54019e-27
	HNRNPLL	CD8.07	0.208	0.101	0.293095	1.26253e-51	2.8859e-47
	PPP4C	CD8.07	0.494	0.336	0.290554	2.51506e-41	5.74892e-37
	GBP4	CD8.07	0.23	0.123	0.290251	2.62595e-44	6.00239e-40
	POMP	CD8.07	0.54	0.384	0.289794	2.07185e-39	4.73584e-35
	FNBP1	CD8.07	0.539	0.391	0.288662	5.61637e-35	1.28379e-30
	UBE2S	CD8.07	0.272	0.152	0.288359	9.75164e-45	2.22903e-40
	S1PR4	CD8.07	0.43	0.329	0.288182	2.19823e-22	5.02471e-18
	EZR	CD8.07	0.585	0.459	0.287967	2.53704e-29	5.79917e-25
	DYNLL1	CD8.07	0.43	0.294	0.28767	2.18862e-36	5.00275e-32
	ZYX	CD8.07	0.563	0.458	0.286681	2.21083e-24	5.05352e-20
	TERF2IP	CD8.07	0.576	0.426	0.285891	5.54123e-35	1.26661e-30
	WNK1	CD8.07	0.386	0.254	0.282241	7.28485e-37	1.66517e-32
	CPNE2	CD8.07	0.13	0.049	0.278764	3.33088e-60	7.61372e-56
	MXD4	CD8.07	0.289	0.167	0.278315	1.54844e-42	3.53942e-38
	PSMB10	CD8.07	0.635	0.501	0.278297	4.50421e-34	1.02957e-29
	NDUFA13	CD8.07	0.69	0.564	0.277618	1.1317e-34	2.58685e-30
	PPP1CC	CD8.07	0.434	0.305	0.27749	3.19005e-32	7.29181e-28
	MRPL10	CD8.07	0.336	0.207	0.277132	1.94946e-39	4.45608e-35
	ABRACL	CD8.07	0.506	0.38	0.277023	8.55786e-29	1.95616e-24
	HSPB11	CD8.07	0.337	0.209	0.277021	3.66363e-39	8.37432e-35
	EVI2B	CD8.07	0.43	0.307	0.276321	2.55686e-30	5.84448e-26
	TOX	CD8.07	0.216	0.11	0.27537	2.94339e-46	6.72801e-42
	ATP5MG	CD8.07	0.929	0.867	0.274973	1.71073e-48	3.91038e-44
	H3F3A	CD8.07	0.959	0.904	0.27443	2.90332e-60	6.63641e-56
	PSMD8	CD8.07	0.493	0.341	0.27411	1.46149e-39	3.34068e-35
	IFRD1	CD8.07	0.281	0.18	0.274051	9.18047e-30	2.09847e-25
	CD99	CD8.07	0.925	0.811	0.273321	1.13665e-53	2.59816e-49
	TXNDC17	CD8.07	0.244	0.125	0.271899	4.08331e-52	9.33364e-48
	YWHAB	CD8.07	0.864	0.786	0.271654	1.43201e-43	3.2733e-39
	CRIP1	CD8.07	0.81	0.718	0.271389	5.07081e-27	1.15909e-22
	PARK7	CD8.07	0.698	0.569	0.271187	2.0205e-32	4.61847e-28
	PTTG1	CD8.07	0.182	0.073	0.269796	1.47331e-69	3.36769e-65
	PTPRCAP	CD8.07	0.491	0.358	0.269687	6.18707e-30	1.41424e-25
	MIS18BP1	CD8.07	0.264	0.142	0.268166	1.70879e-48	3.90595e-44
	CORO7	CD8.07	0.299	0.187	0.26744	3.63348e-34	8.30541e-30
	ARPC4	CD8.07	0.547	0.412	0.266542	1.27055e-31	2.90422e-27
	REL	CD8.07	0.355	0.235	0.266308	2.36587e-31	5.40791e-27
	CALM3	CD8.07	0.557	0.433	0.265888	3.36675e-28	7.69572e-24
	CASP4	CD8.07	0.398	0.267	0.265676	1.13619e-31	2.59711e-27
	DZIP3	CD8.07	0.14	0.053	0.264691	5.73481e-62	1.31086e-57
	PECAM1	CD8.07	0.27	0.159	0.264478	7.03656e-38	1.60842e-33
	TESC	CD8.07	0.186	0.08	0.264226	4.63218e-62	1.05882e-57
	XCL2	CD8.07	0.209	0.131	0.264061	1.33937e-23	3.06153e-19
	DRAP1	CD8.07	0.649	0.515	0.262791	3.1127e-30	7.11501e-26
	YWHAZ	CD8.07	0.904	0.817	0.261652	9.78902e-46	2.23758e-41
	ODC1	CD8.07	0.4	0.273	0.261586	1.27562e-31	2.91582e-27
	ATP5IF1	CD8.07	0.68	0.558	0.261527	4.91126e-31	1.12262e-26
	COX8A	CD8.07	0.708	0.584	0.261294	2.95547e-32	6.75562e-28
	SMS	CD8.07	0.265	0.153	0.261205	1.01186e-39	2.31291e-35
	SLFN5	CD8.07	0.455	0.342	0.260451	1.64605e-22	3.76254e-18
	HMGN2	CD8.07	0.664	0.612	0.260321	4.71285e-07	0.0107726
	COX6A1	CD8.07	0.814	0.696	0.259626	8.80675e-38	2.01305e-33
	NOP10	CD8.07	0.382	0.264	0.259397	3.5799e-28	8.18293e-24
	CARD16	CD8.07	0.429	0.293	0.259319	5.58163e-34	1.27585e-29
	BTG3	CD8.07	0.202	0.105	0.259145	4.02147e-42	9.19229e-38
	DNAJA1	CD8.07	0.359	0.232	0.258075	3.35366e-35	7.66581e-31
	PARP1	CD8.07	0.388	0.262	0.257446	1.45263e-31	3.32042e-27
	MYH9	CD8.07	0.661	0.558	0.256547	2.30736e-23	5.27416e-19
	CMTM7	CD8.07	0.292	0.19	0.256341	1.73746e-29	3.97147e-25
	BIN1	CD8.07	0.552	0.44	0.256334	2.59245e-26	5.92583e-22
	TWF2	CD8.07	0.43	0.305	0.256046	5.40512e-29	1.2355e-24
	C17orf49	CD8.07	0.383	0.263	0.25603	3.28525e-30	7.50942e-26
	PSMA6	CD8.07	0.529	0.381	0.255803	1.9946e-33	4.55926e-29
	HACD4	CD8.07	0.306	0.197	0.255746	4.53279e-30	1.03611e-25
	ATXN1	CD8.07	0.183	0.087	0.255716	2.51905e-48	5.75804e-44
	MRPL54	CD8.07	0.456	0.32	0.255034	1.80827e-32	4.13333e-28
	RNF213	CD8.07	0.671	0.543	0.254682	2.26943e-31	5.18746e-27
	IL2RG	CD8.07	0.806	0.721	0.254594	5.49029e-32	1.25497e-27
	FAM107B	CD8.07	0.544	0.42	0.254191	4.04359e-29	9.24284e-25
	SH3KBP1	CD8.07	0.502	0.358	0.252657	1.60764e-32	3.67475e-28
	ACTR2	CD8.07	0.553	0.427	0.252078	2.8671e-28	6.55362e-24
	LPXN	CD8.07	0.374	0.247	0.251939	4.10211e-33	9.3766e-29
	TRIM59	CD8.07	0.175	0.07	0.251914	1.85576e-67	4.24189e-63
	CSK	CD8.07	0.549	0.417	0.251822	5.99046e-29	1.3693e-24
	STMN1	CD8.08	0.995	0.169	3.59673	4.94164e-296	1.12956e-291
	TUBA1B	CD8.08	0.99	0.448	3.1364	2.47401e-141	5.65509e-137
	TYMS	CD8.08	0.84	0.002	2.55899	0	0
	TUBB	CD8.08	0.951	0.407	2.49523	2.34389e-117	5.35767e-113
	HMGB2	CD8.08	0.981	0.4	2.44056	3.51029e-133	8.02383e-129
	HMGN2	CD8.08	0.985	0.613	2.40798	5.66279e-120	1.2944e-115
	COTL1	CD8.08	0.864	0.407	2.28069	1.54768e-88	3.53768e-84
	H2AFZ	CD8.08	0.976	0.478	2.21758	5.75902e-119	1.3164e-114
	RRM2	CD8.08	0.607	0.003	2.11926	0	0
	HIST1H4C	CD8.08	0.913	0.634	2.0998	4.02196e-28	9.19339e-24
	MKI67	CD8.08	0.743	0.005	2.08606	0	0
	GAPDH	CD8.08	1	0.931	2.04097	1.89243e-117	4.32571e-113
	PCLAF	CD8.08	0.762	0.004	1.96879	0	0
	DUT	CD8.08	0.893	0.337	1.83194	2.44397e-100	5.58643e-96
	MCM7	CD8.08	0.757	0.056	1.78954	0	0
	PCNA	CD8.08	0.801	0.071	1.78027	0	0
	HIST1H1B	CD8.08	0.485	0.03	1.77104	6.03329e-299	1.37909e-294
	H2AFV	CD8.08	0.917	0.437	1.69982	2.05854e-96	4.7054e-92
	HLA-DRA	CD8.08	0.748	0.125	1.64917	9.89141e-157	2.26098e-152
	FABP5	CD8.08	0.728	0.092	1.62526	9.84099e-214	2.24945e-209
	DEK	CD8.08	0.966	0.403	1.61697	1.96783e-101	4.49808e-97
	SLC25A5	CD8.08	0.937	0.501	1.58996	4.21615e-88	9.63727e-84
	MCM5	CD8.08	0.718	0.069	1.55722	1.89974e-284	4.34243e-280
	LGALS1	CD8.08	0.84	0.398	1.51904	1.23874e-46	2.83152e-42
	PTTG1	CD8.08	0.68	0.076	1.51308	3.82166e-222	8.73555e-218
	ANXA2	CD8.08	0.922	0.418	1.51272	3.66289e-79	8.37263e-75
	HMGB1	CD8.08	0.985	0.834	1.49804	2.56463e-82	5.86223e-78
	ANXA5	CD8.08	0.864	0.284	1.47559	2.13331e-95	4.87632e-91
	TK1	CD8.08	0.65	0.003	1.46981	0	0
	RAN	CD8.08	0.99	0.585	1.46892	2.79362e-90	6.38565e-86
	PRDX3	CD8.08	0.796	0.111	1.44293	1.73555e-208	3.96711e-204
	LMNB1	CD8.08	0.714	0.038	1.42549	0	0
	MCM3	CD8.08	0.723	0.09	1.40757	6.47899e-213	1.48097e-208
	CLSPN	CD8.08	0.646	0.004	1.3742	0	0
	CENPF	CD8.08	0.515	0.006	1.36477	0	0
	SMC4	CD8.08	0.709	0.067	1.34263	2.6355e-273	6.02423e-269
	NASP	CD8.08	0.767	0.162	1.33324	1.58807e-124	3.63002e-120
	CDCA7	CD8.08	0.612	0.019	1.3321	0	0
	JPT1	CD8.08	0.801	0.234	1.32792	4.05792e-89	9.27559e-85
	RPA3	CD8.08	0.859	0.139	1.32155	1.40479e-183	3.21107e-179
	ANP32E	CD8.08	0.835	0.242	1.31735	2.2083e-94	5.04773e-90
	VIM	CD8.08	0.981	0.878	1.30485	1.09361e-54	2.49976e-50
	NUSAP1	CD8.08	0.529	0.005	1.29637	0	0
	CENPM	CD8.08	0.641	0.011	1.2955	0	0
	CRIP1	CD8.08	0.903	0.722	1.29077	5.74471e-40	1.31313e-35
	CDT1	CD8.08	0.636	0.003	1.29047	0	0
	PRDX1	CD8.08	0.859	0.364	1.28317	7.4914e-63	1.71238e-58
	GINS2	CD8.08	0.583	0.002	1.27184	0	0
	CALM3	CD8.08	0.903	0.437	1.26346	5.94295e-70	1.35844e-65
	COX5A	CD8.08	0.947	0.451	1.2555	1.62881e-76	3.72312e-72
	DHFR	CD8.08	0.631	0.026	1.25458	0	0
	MCM4	CD8.08	0.592	0.016	1.24552	0	0
	TXN	CD8.08	0.903	0.364	1.23452	4.13368e-73	9.44877e-69
	UBE2C	CD8.08	0.403	0.001	1.22617	0	0
	COX8A	CD8.08	0.971	0.589	1.21792	3.04873e-72	6.96878e-68
	RANBP1	CD8.08	0.864	0.248	1.21562	3.5816e-96	8.18683e-92
	CD74	CD8.08	0.99	0.804	1.21158	4.71154e-43	1.07696e-38
	TMPO	CD8.08	0.811	0.196	1.2053	6.68928e-102	1.52904e-97
	SNRPB	CD8.08	0.917	0.387	1.20105	4.65406e-75	1.06383e-70
	TPI1	CD8.08	0.947	0.578	1.19763	2.00295e-64	4.57835e-60
	HMGA1	CD8.08	0.733	0.149	1.19576	2.31874e-119	5.30019e-115
	HNRNPA2B1	CD8.08	0.99	0.856	1.19529	3.50183e-81	8.00447e-77
	CENPU	CD8.08	0.602	0.01	1.19394	0	0
	PSME2	CD8.08	0.927	0.558	1.18233	4.1085e-56	9.3912e-52
	H2AFY	CD8.08	0.84	0.226	1.17991	1.10619e-100	2.52853e-96
	TPM4	CD8.08	0.757	0.17	1.17717	2.08381e-104	4.76318e-100
	LDHA	CD8.08	0.932	0.52	1.17341	8.49085e-59	1.94084e-54
	SLBP	CD8.08	0.767	0.174	1.17087	1.20815e-106	2.7616e-102
	TOP2A	CD8.08	0.466	0.006	1.16947	0	0
	SMC2	CD8.08	0.636	0.041	1.15764	0	0
	ANP32B	CD8.08	0.937	0.535	1.15609	4.1305e-66	9.44149e-62
	IDH2	CD8.08	0.84	0.289	1.15326	1.79645e-72	4.10632e-68
	ALYREF	CD8.08	0.733	0.223	1.15129	4.08461e-74	9.33661e-70
	NUDT1	CD8.08	0.772	0.123	1.14417	5.30851e-162	1.21342e-157
	HELLS	CD8.08	0.626	0.031	1.13195	0	0
	ATP5MC3	CD8.08	0.966	0.584	1.12861	8.49628e-65	1.94208e-60
	MT2A	CD8.08	0.937	0.576	1.12511	2.67724e-45	6.11964e-41
	HIST1H1D	CD8.08	0.762	0.368	1.12467	9.25659e-30	2.11587e-25
	HLA-DRB1	CD8.08	0.816	0.374	1.12453	4.78958e-43	1.0948e-38
	ASF1B	CD8.08	0.544	0.004	1.11883	0	0
	TFDP1	CD8.08	0.752	0.096	1.11227	2.50174e-200	5.71848e-196
	DDX39A	CD8.08	0.83	0.234	1.11146	2.26101e-87	5.16821e-83
	ENO1	CD8.08	0.937	0.55	1.10495	2.91615e-54	6.66573e-50
	CKS2	CD8.08	0.568	0.033	1.10384	0	0
	CBX3	CD8.08	0.893	0.331	1.10009	3.96779e-71	9.06957e-67
	CARHSP1	CD8.08	0.777	0.134	1.09215	6.35172e-143	1.45188e-138
	HSPD1	CD8.08	0.772	0.252	1.0837	1.49361e-63	3.4141e-59
	MCM6	CD8.08	0.636	0.04	1.08241	0	0
	DNMT1	CD8.08	0.84	0.211	1.08123	4.53364e-99	1.0363e-94
	HNRNPAB	CD8.08	0.757	0.171	1.07412	5.03093e-100	1.14997e-95
	HNRNPF	CD8.08	0.908	0.435	1.07173	9.47197e-57	2.1651e-52
	HLA-DRB5	CD8.08	0.67	0.19	1.07069	1.21569e-62	2.77883e-58
	PSMA4	CD8.08	0.796	0.21	1.0672	1.40051e-86	3.20128e-82
	ATAD2	CD8.08	0.573	0.057	1.0664	5.32315e-204	1.21677e-199
	HNRNPD	CD8.08	0.869	0.385	1.05714	2.99075e-61	6.83625e-57
	ZWINT	CD8.08	0.592	0.005	1.04894	0	0
	BIRC5	CD8.08	0.49	0.001	1.04847	0	0
	PGAM1	CD8.08	0.927	0.452	1.04421	1.46992e-57	3.35993e-53
	FEN1	CD8.08	0.578	0.035	1.04313	0	0
	YWHAE	CD8.08	0.704	0.141	1.02991	1.6022e-107	3.66231e-103
	TALDO1	CD8.08	0.84	0.275	1.02453	9.1502e-74	2.09155e-69
	UHRF1	CD8.08	0.466	0	1.02241	0	0
	NAP1L1	CD8.08	0.913	0.427	1.01225	2.08949e-54	4.77615e-50
	UBE2S	CD8.08	0.636	0.157	1.00892	1.14634e-70	2.6203e-66
	TUBB4B	CD8.08	0.66	0.214	1.00834	4.12733e-49	9.43425e-45
	ATP5F1B	CD8.08	0.937	0.566	1.00383	2.34537e-53	5.36104e-49
	LSM4	CD8.08	0.806	0.257	1.00237	8.79386e-71	2.0101e-66
	TXNDC17	CD8.08	0.728	0.128	1.00176	1.14794e-128	2.62396e-124
	HIST1H3B	CD8.08	0.359	0.003	1.00038	0	0
	SNRPG	CD8.08	0.864	0.373	0.999995	1.4861e-57	3.39692e-53
	PSMA2	CD8.08	0.772	0.286	0.999901	2.53303e-58	5.79e-54
	HSP90AA1	CD8.08	0.976	0.793	0.999523	1.00299e-52	2.29264e-48
	ARPC5	CD8.08	0.951	0.529	0.997523	3.64775e-52	8.33803e-48
	CCDC167	CD8.08	0.762	0.155	0.990981	2.42739e-108	5.54854e-104
	HNRNPA3	CD8.08	0.937	0.546	0.989744	2.36329e-52	5.402e-48
	CNN2	CD8.08	0.874	0.565	0.983946	5.77651e-37	1.32039e-32
	YBX1	CD8.08	0.985	0.796	0.98035	2.14498e-62	4.903e-58
	MT1E	CD8.08	0.646	0.123	0.978464	3.08356e-100	7.04841e-96
	MRPL51	CD8.08	0.796	0.235	0.976461	9.72314e-73	2.22252e-68
	CKS1B	CD8.08	0.573	0.04	0.975577	2.49018e-295	5.69206e-291
	EIF4A1	CD8.08	0.806	0.528	0.974718	1.45999e-34	3.33725e-30
	MCM2	CD8.08	0.539	0.012	0.9721	0	0
	RRM1	CD8.08	0.636	0.052	0.970456	9.07959e-277	2.07541e-272
	USP1	CD8.08	0.704	0.14	0.967241	6.45694e-105	1.47593e-100
	SRSF3	CD8.08	0.932	0.472	0.963215	1.78093e-50	4.07085e-46
	PHF19	CD8.08	0.655	0.044	0.947346	0	0
	CORO1A	CD8.08	0.961	0.884	0.946544	7.3973e-49	1.69088e-44
	TPX2	CD8.08	0.481	0.005	0.944457	0	0
	CBX5	CD8.08	0.631	0.077	0.937322	2.77292e-172	6.33835e-168
	EZH2	CD8.08	0.573	0.023	0.936455	0	0
	DNAJC9	CD8.08	0.694	0.124	0.932982	9.31584e-118	2.12941e-113
	TMEM106C	CD8.08	0.65	0.094	0.929949	6.77968e-144	1.5497e-139
	CDC20	CD8.08	0.316	0.001	0.9292	0	0
	PKM	CD8.08	0.864	0.464	0.928449	1.17303e-42	2.6813e-38
	BANF1	CD8.08	0.883	0.301	0.925075	6.90667e-62	1.57873e-57
	HIST1H1C	CD8.08	0.709	0.247	0.92178	5.89834e-46	1.34824e-41
	ARPC1B	CD8.08	0.913	0.709	0.916146	1.52777e-41	3.49217e-37
	PSMB8	CD8.08	0.932	0.545	0.915677	2.3162e-48	5.29438e-44
	NUCKS1	CD8.08	0.913	0.4	0.914963	1.69069e-50	3.86458e-46
	YWHAH	CD8.08	0.767	0.184	0.913709	5.06348e-86	1.15741e-81
	CDKN3	CD8.08	0.485	0.007	0.909356	0	0
	S100A10	CD8.08	0.976	0.819	0.909308	3.98878e-38	9.11756e-34
	MAD2L1	CD8.08	0.578	0.042	0.900523	1.56191e-289	3.57022e-285
	PSMB2	CD8.08	0.811	0.225	0.898784	3.18068e-76	7.2704e-72
	SUB1	CD8.08	0.966	0.71	0.898581	1.10161e-41	2.51807e-37
	H3F3A	CD8.08	0.995	0.906	0.896855	1.33906e-60	3.06082e-56
	SMC3	CD8.08	0.68	0.171	0.893505	1.70944e-73	3.90743e-69
	CENPX	CD8.08	0.714	0.155	0.893081	9.94289e-90	2.27275e-85
	CDK1	CD8.08	0.354	0.002	0.888728	0	0
	SNRPD1	CD8.08	0.806	0.27	0.885064	1.39524e-59	3.18925e-55
	CDK2AP2	CD8.08	0.801	0.301	0.884426	7.43336e-48	1.69912e-43
	CHCHD2	CD8.08	0.966	0.786	0.881247	1.66531e-52	3.80657e-48
	CCNB2	CD8.08	0.398	0.001	0.876434	0	0
	LCP1	CD8.08	0.981	0.703	0.876176	1.7317e-43	3.95833e-39
	GNG5	CD8.08	0.903	0.47	0.876025	3.38137e-46	7.72914e-42
	PSMB3	CD8.08	0.864	0.395	0.875822	1.13431e-47	2.59281e-43
	CLTA	CD8.08	0.752	0.218	0.872581	2.63179e-69	6.01574e-65
	ATP5MF	CD8.08	0.893	0.513	0.864568	1.95682e-43	4.4729e-39
	MYBL2	CD8.08	0.456	0	0.864478	0	0
	SEM1	CD8.08	0.859	0.337	0.864421	1.73851e-54	3.9739e-50
	LIG1	CD8.08	0.544	0.056	0.864276	6.33043e-184	1.44701e-179
	SIVA1	CD8.08	0.811	0.303	0.864253	8.2501e-52	1.88581e-47
	CCT5	CD8.08	0.777	0.22	0.856835	5.46706e-70	1.24966e-65
	HPRT1	CD8.08	0.723	0.145	0.856622	4.85084e-99	1.1088e-94
	SKA2	CD8.08	0.621	0.084	0.854954	5.61397e-147	1.28324e-142
	YWHAQ	CD8.08	0.917	0.482	0.851929	5.64253e-44	1.28977e-39
	HMGN1	CD8.08	0.942	0.574	0.851123	1.65299e-39	3.7784e-35
	CENPW	CD8.08	0.534	0.011	0.843768	0	0
	POMP	CD8.08	0.893	0.39	0.842397	4.23663e-49	9.6841e-45
	SLC25A3	CD8.08	0.932	0.599	0.840685	9.63111e-45	2.20148e-40
	VDAC1	CD8.08	0.748	0.235	0.840171	1.0214e-57	2.33473e-53
	SNRPE	CD8.08	0.801	0.246	0.836141	6.26491e-62	1.43203e-57
	RBX1	CD8.08	0.85	0.367	0.835423	2.37818e-44	5.43605e-40
	HNRNPR	CD8.08	0.883	0.365	0.83489	9.66049e-49	2.20819e-44
	PSMD8	CD8.08	0.854	0.346	0.834472	2.3593e-48	5.3929e-44
	COX6A1	CD8.08	0.947	0.701	0.830615	6.33268e-46	1.44752e-41
	PARP1	CD8.08	0.816	0.267	0.829792	1.50998e-59	3.45151e-55
	RAD21	CD8.08	0.82	0.377	0.822798	1.52042e-35	3.47537e-31
	PSMA7	CD8.08	0.932	0.56	0.821542	1.20591e-41	2.75648e-37
	DBI	CD8.08	0.947	0.523	0.821014	3.40088e-42	7.77374e-38
	ATP5F1C	CD8.08	0.874	0.387	0.817021	3.15969e-47	7.22241e-43
	NDUFB3	CD8.08	0.782	0.25	0.815972	9.25579e-59	2.11569e-54
	PSMA5	CD8.08	0.825	0.316	0.815717	3.52149e-47	8.04942e-43
	ERH	CD8.08	0.874	0.433	0.811698	1.63898e-42	3.74639e-38
	SAE1	CD8.08	0.67	0.109	0.806788	3.84405e-122	8.78673e-118
	S100A9	CD8.08	0.073	0.021	0.803797	2.08637e-07	0.00476903
	PSMA6	CD8.08	0.85	0.387	0.803429	2.71038e-43	6.19538e-39
	PPM1G	CD8.08	0.845	0.294	0.802993	5.81199e-54	1.3285e-49
	ILF2	CD8.08	0.816	0.275	0.801848	1.01619e-53	2.3228e-49
	E2F1	CD8.08	0.461	0.002	0.800769	0	0
	PRKDC	CD8.08	0.728	0.228	0.799618	2.93127e-56	6.70029e-52
	ARPC2	CD8.08	0.985	0.853	0.797422	3.08112e-45	7.04281e-41
	SET	CD8.08	0.927	0.577	0.794898	4.15255e-36	9.4919e-32
	PPP1CA	CD8.08	0.922	0.658	0.792213	2.07479e-36	4.74256e-32
	RTRAF	CD8.08	0.869	0.395	0.788253	2.50043e-40	5.71547e-36
	DECR1	CD8.08	0.748	0.224	0.787145	5.66217e-57	1.29426e-52
	SNRNP25	CD8.08	0.563	0.052	0.787096	4.26445e-214	9.74768e-210
	WDR34	CD8.08	0.495	0.011	0.783907	0	0
	RBBP8	CD8.08	0.5	0.009	0.782028	0	0
	H2AFX	CD8.08	0.553	0.123	0.778009	1.48811e-67	3.40152e-63
	ASPM	CD8.08	0.345	0.002	0.777844	0	0
	PAICS	CD8.08	0.51	0.039	0.777695	1.02983e-239	2.35399e-235
	KIF22	CD8.08	0.597	0.134	0.772166	5.05513e-71	1.1555e-66
	FKBP1A	CD8.08	0.782	0.315	0.771659	4.89766e-41	1.11951e-36
	NDUFS6	CD8.08	0.82	0.29	0.770695	7.09464e-50	1.62169e-45
	CACYBP	CD8.08	0.782	0.258	0.770673	1.78794e-54	4.08687e-50
	BRCA1	CD8.08	0.437	0.009	0.769442	0	0
	SHMT2	CD8.08	0.665	0.103	0.769267	1.2649e-128	2.89131e-124
	NAA38	CD8.08	0.801	0.303	0.767468	2.00226e-44	4.57676e-40
	UBE2T	CD8.08	0.451	0.014	0.76517	0	0
	ACTR3	CD8.08	0.908	0.528	0.763378	4.32574e-38	9.88778e-34
	NME1	CD8.08	0.607	0.118	0.763265	4.91598e-90	1.12369e-85
	NME2	CD8.08	0.893	0.636	0.762321	7.22518e-28	1.65153e-23
	COX7B	CD8.08	0.888	0.452	0.761273	2.00804e-37	4.58998e-33
	PDIA6	CD8.08	0.796	0.322	0.759686	5.66301e-41	1.29445e-36
	TUBA1C	CD8.08	0.558	0.113	0.758003	4.14389e-77	9.47211e-73
	CALR	CD8.08	0.903	0.596	0.757997	3.36597e-25	7.69394e-21
	CENPK	CD8.08	0.617	0.116	0.754408	2.63621e-94	6.02586e-90
	CCNA2	CD8.08	0.34	0.001	0.753684	0	0
	SUPT16H	CD8.08	0.728	0.204	0.753372	4.58123e-60	1.04718e-55
	COPS3	CD8.08	0.66	0.129	0.753011	6.40679e-94	1.46446e-89
	IFI16	CD8.08	0.762	0.249	0.751558	1.73353e-53	3.96249e-49
	EIF4A3	CD8.08	0.665	0.12	0.751098	4.73794e-107	1.083e-102
	SSRP1	CD8.08	0.675	0.157	0.748534	3.76778e-75	8.61239e-71
	ANAPC11	CD8.08	0.801	0.353	0.748457	9.92458e-40	2.26856e-35
	COX6C	CD8.08	0.971	0.739	0.748097	3.23533e-40	7.39533e-36
	DCTPP1	CD8.08	0.568	0.085	0.747949	3.89575e-119	8.9049e-115
	HIST1H3G	CD8.08	0.248	0	0.745837	0	0
	MTHFD2	CD8.08	0.539	0.05	0.744537	8.87619e-200	2.02892e-195
	GGCT	CD8.08	0.583	0.08	0.74416	1.27063e-134	2.90441e-130
	FANCI	CD8.08	0.515	0.015	0.741912	0	0
	PSMB6	CD8.08	0.825	0.38	0.740387	1.33928e-39	3.06133e-35
	ABRACL	CD8.08	0.85	0.384	0.739951	2.63731e-37	6.02836e-33
	EIF5A	CD8.08	0.864	0.544	0.738829	1.01577e-30	2.32184e-26
	TAGLN2	CD8.08	0.956	0.687	0.737783	1.07579e-31	2.45905e-27
	CCT2	CD8.08	0.772	0.253	0.73759	8.29785e-48	1.89672e-43
	UNG	CD8.08	0.476	0.047	0.737535	7.11668e-168	1.62673e-163
	PSMB9	CD8.08	0.942	0.68	0.735222	2.54247e-35	5.81159e-31
	UQCRQ	CD8.08	0.888	0.446	0.73474	4.76015e-36	1.08808e-31
	CDK4	CD8.08	0.612	0.123	0.732757	6.20606e-84	1.41858e-79
	CDC45	CD8.08	0.422	0.001	0.732341	0	0
	CHEK1	CD8.08	0.466	0.006	0.732193	0	0
	HMGB3	CD8.08	0.393	0.006	0.731553	0	0
	DYNLL1	CD8.08	0.806	0.299	0.731513	5.13554e-43	1.17388e-38
	MYL6	CD8.08	0.985	0.915	0.73104	1.67492e-42	3.82854e-38
	HSPB11	CD8.08	0.762	0.213	0.726057	1.63161e-62	3.72953e-58
	AP2S1	CD8.08	0.806	0.303	0.725616	5.01861e-43	1.14715e-38
	MDH1	CD8.08	0.791	0.271	0.72561	1.36178e-48	3.11277e-44
	NDUFA7	CD8.08	0.704	0.198	0.725373	2.39799e-58	5.48133e-54
	SNRPF	CD8.08	0.84	0.364	0.724068	3.74544e-41	8.56132e-37
	GSTP1	CD8.08	0.903	0.591	0.722793	2.86937e-27	6.55881e-23
	ATP5PF	CD8.08	0.903	0.466	0.722149	4.25711e-36	9.7309e-32
	MZT2B	CD8.08	0.898	0.589	0.721107	5.44894e-30	1.24552e-25
	DTYMK	CD8.08	0.587	0.076	0.718637	1.59884e-145	3.65464e-141
	MRPL37	CD8.08	0.641	0.108	0.717652	2.66249e-111	6.08593e-107
	UQCC2	CD8.08	0.641	0.101	0.713807	8.7378e-122	1.99729e-117
	NONO	CD8.08	0.806	0.308	0.713441	4.5652e-40	1.04351e-35
	CLIC1	CD8.08	0.961	0.726	0.712998	7.79247e-31	1.7812e-26
	HIST1H3D	CD8.08	0.417	0.145	0.709813	4.74699e-25	1.08507e-20
	NDUFB9	CD8.08	0.893	0.52	0.708606	1.926e-34	4.40244e-30
	ELOC	CD8.08	0.777	0.251	0.707813	8.88297e-50	2.03047e-45
	SRSF10	CD8.08	0.801	0.323	0.707231	5.15733e-39	1.17886e-34
	MZT2A	CD8.08	0.796	0.322	0.706227	2.05938e-39	4.70734e-35
	ANAPC15	CD8.08	0.704	0.152	0.704848	2.41621e-85	5.52297e-81
	CEP55	CD8.08	0.369	0.001	0.703599	0	0
	NDUFB6	CD8.08	0.767	0.243	0.702692	7.64473e-52	1.74743e-47
	PKMYT1	CD8.08	0.325	0	0.7014	0	0
	XRCC5	CD8.08	0.908	0.452	0.699992	5.99614e-34	1.3706e-29
	TPGS2	CD8.08	0.675	0.128	0.699881	1.47559e-97	3.3729e-93
	CENPH	CD8.08	0.481	0.027	0.697478	0	0
	SRSF2	CD8.08	0.888	0.47	0.696697	3.18065e-30	7.27034e-26
	CCT6A	CD8.08	0.796	0.286	0.695077	2.21663e-45	5.06677e-41
	SRP9	CD8.08	0.917	0.456	0.694235	2.22641e-37	5.08913e-33
	PARK7	CD8.08	0.893	0.574	0.692233	3.11335e-28	7.11649e-24
	RNASEH2B	CD8.08	0.709	0.194	0.690724	2.71251e-59	6.20027e-55
	SMC1A	CD8.08	0.631	0.128	0.690476	1.52199e-84	3.47897e-80
	LBR	CD8.08	0.767	0.254	0.687488	7.99264e-49	1.82696e-44
	HDGF	CD8.08	0.641	0.12	0.687046	4.0948e-95	9.35989e-91
	ACOT7	CD8.08	0.466	0.029	0.68665	2.15653e-267	4.9294e-263
	UBE2N	CD8.08	0.801	0.246	0.685603	3.28928e-55	7.51864e-51
	DTL	CD8.08	0.364	0.001	0.683455	0	0
	LSM3	CD8.08	0.806	0.264	0.683437	8.00194e-49	1.82908e-44
	SFPQ	CD8.08	0.816	0.43	0.682824	8.55471e-29	1.95543e-24
	HDAC1	CD8.08	0.82	0.329	0.681866	2.91205e-37	6.65635e-33
	S100A4	CD8.08	0.99	0.911	0.67888	3.96832e-23	9.07079e-19
	LSM2	CD8.08	0.748	0.233	0.678474	2.17796e-50	4.97837e-46
	MTCH2	CD8.08	0.646	0.133	0.678443	1.35862e-81	3.10554e-77
	S100A6	CD8.08	0.981	0.92	0.678156	1.46636e-22	3.3518e-18
	RBBP4	CD8.08	0.782	0.319	0.677663	6.28021e-36	1.43553e-31
	C17orf49	CD8.08	0.743	0.267	0.674487	1.79544e-40	4.10401e-36
	LSM5	CD8.08	0.801	0.257	0.673587	2.84714e-51	6.508e-47
	RFC4	CD8.08	0.553	0.046	0.672545	3.79502e-230	8.67466e-226
	PSMA3	CD8.08	0.714	0.212	0.671755	8.78024e-53	2.00699e-48
	SMS	CD8.08	0.631	0.157	0.671366	3.06015e-61	6.99489e-57
	PDCD5	CD8.08	0.762	0.281	0.67136	3.35161e-39	7.66112e-35
	TCP1	CD8.08	0.655	0.171	0.670359	9.21288e-59	2.10588e-54
	ATP5PB	CD8.08	0.864	0.456	0.668803	2.5668e-30	5.86719e-26
	NDUFV2	CD8.08	0.83	0.33	0.668602	1.95589e-40	4.47078e-36
	HIST1H3C	CD8.08	0.262	0.005	0.668384	0	0
	IMPDH2	CD8.08	0.665	0.172	0.667211	8.16171e-62	1.8656e-57
	GMNN	CD8.08	0.451	0.015	0.666362	0	0
	DCTN3	CD8.08	0.791	0.317	0.664669	1.783e-36	4.07558e-32
	KNL1	CD8.08	0.33	0.003	0.66336	0	0
	DLGAP5	CD8.08	0.325	0	0.662019	0	0
	ATP5F1A	CD8.08	0.84	0.438	0.661208	1.55308e-29	3.55003e-25
	NABP2	CD8.08	0.587	0.093	0.660834	9.76317e-110	2.23167e-105
	CAP1	CD8.08	0.922	0.574	0.659087	1.90459e-29	4.35352e-25
	HLA-DMA	CD8.08	0.563	0.125	0.657922	4.7817e-66	1.093e-61
	TIMELESS	CD8.08	0.432	0.012	0.657388	0	0
	NSD2	CD8.08	0.451	0.04	0.657232	2.59298e-177	5.92704e-173
	GNAI2	CD8.08	0.883	0.575	0.655897	7.0544e-24	1.6125e-19
	HAUS1	CD8.08	0.587	0.08	0.653359	2.66337e-133	6.08792e-129
	FBXO5	CD8.08	0.359	0.015	0.652881	0	0
	NUDT21	CD8.08	0.718	0.198	0.650254	9.02665e-57	2.06331e-52
	RFC2	CD8.08	0.505	0.043	0.649092	9.33204e-208	2.13312e-203
	HLA-DPA1	CD8.08	0.859	0.516	0.648919	5.63388e-22	1.28779e-17
	MTHFD1	CD8.08	0.461	0.043	0.648176	8.0243e-173	1.83419e-168
	TROAP	CD8.08	0.393	0.001	0.644267	0	0
	S100A11	CD8.08	0.786	0.462	0.643068	1.61794e-17	3.69828e-13
	NDUFA12	CD8.08	0.84	0.384	0.642906	1.16883e-33	2.67171e-29
	C1QBP	CD8.08	0.772	0.36	0.641795	1.18298e-28	2.70406e-24
	GDI2	CD8.08	0.83	0.343	0.641499	9.78851e-37	2.23746e-32
	NDUFA2	CD8.08	0.806	0.342	0.639053	4.53322e-33	1.0362e-28
	PLP2	CD8.08	0.689	0.295	0.635268	1.7273e-25	3.94827e-21
	CDCA7L	CD8.08	0.422	0.013	0.635044	0	0
	GMPS	CD8.08	0.626	0.137	0.632852	1.79746e-73	4.10863e-69
	CAPZB	CD8.08	0.932	0.665	0.630587	4.68694e-26	1.07134e-21
	EIF2S2	CD8.08	0.728	0.268	0.626836	9.62861e-39	2.20091e-34
	PSMB10	CD8.08	0.864	0.507	0.626227	6.95032e-26	1.58871e-21
	HNRNPU	CD8.08	0.893	0.563	0.625538	1.21688e-25	2.78154e-21
	CCNB1	CD8.08	0.282	0.006	0.625356	0	0
	PA2G4	CD8.08	0.845	0.417	0.622453	3.57154e-26	8.16382e-22
	MRPL11	CD8.08	0.718	0.192	0.621664	8.24291e-59	1.88416e-54
	HIST1H1E	CD8.08	0.864	0.573	0.621293	2.89963e-11	6.62797e-07
	NDUFA6	CD8.08	0.835	0.35	0.620003	1.76173e-35	4.02697e-31
	HNRNPC	CD8.08	0.908	0.586	0.619292	6.20165e-26	1.41757e-21
	ARPC3	CD8.08	0.966	0.808	0.618451	6.92716e-33	1.58341e-28
	NUDT5	CD8.08	0.68	0.148	0.617181	7.43365e-78	1.69918e-73
	DAZAP1	CD8.08	0.699	0.237	0.616898	1.21485e-41	2.77691e-37
	NDUFAB1	CD8.08	0.767	0.318	0.616494	1.64983e-33	3.77119e-29
	TXNL4A	CD8.08	0.796	0.358	0.61497	4.97098e-30	1.13627e-25
	PGK1	CD8.08	0.874	0.53	0.614088	8.56919e-26	1.95875e-21
	RNASEH2A	CD8.08	0.476	0.044	0.613837	7.25499e-178	1.65835e-173
	HAT1	CD8.08	0.553	0.108	0.61351	1.51694e-77	3.46743e-73
	CXCR3	CD8.08	0.529	0.154	0.611519	7.57074e-43	1.73052e-38
	BLOC1S1	CD8.08	0.859	0.432	0.61131	1.58007e-30	3.61174e-26
	TOPBP1	CD8.08	0.534	0.082	0.610818	2.31805e-104	5.29859e-100
	UQCRH	CD8.08	0.913	0.581	0.61058	1.63783e-28	3.74374e-24
	WDR1	CD8.08	0.85	0.465	0.60957	1.30753e-26	2.98875e-22
	MRPL52	CD8.08	0.752	0.236	0.609504	2.34342e-46	5.3566e-42
	EIF3I	CD8.08	0.82	0.315	0.608187	2.15053e-38	4.91568e-34
	CCT4	CD8.08	0.791	0.34	0.606492	8.66442e-29	1.98051e-24
	RPS27L	CD8.08	0.83	0.435	0.606194	1.03489e-23	2.36555e-19
	NDUFB11	CD8.08	0.937	0.57	0.605208	4.43357e-29	1.01343e-24
	LDHB	CD8.08	0.927	0.698	0.60346	1.78167e-23	4.07254e-19
	NDUFC2	CD8.08	0.816	0.412	0.603373	9.89186e-28	2.26108e-23
	FDPS	CD8.08	0.68	0.18	0.601484	1.2852e-57	2.93771e-53
	DCPS	CD8.08	0.597	0.093	0.599607	1.9392e-113	4.43262e-109
	ACAT2	CD8.08	0.558	0.078	0.59911	5.1631e-123	1.18018e-118
	ANP32A	CD8.08	0.791	0.324	0.598589	1.70527e-34	3.89791e-30
	NCAPD2	CD8.08	0.476	0.059	0.598561	2.41993e-126	5.53148e-122
	VRK1	CD8.08	0.563	0.091	0.598029	3.05076e-102	6.97342e-98
	HSPE1	CD8.08	0.791	0.402	0.597712	1.36831e-23	3.12768e-19
	LRRFIP1	CD8.08	0.859	0.476	0.597616	5.73354e-23	1.31057e-18
	TPM3	CD8.08	0.971	0.786	0.596987	5.08257e-30	1.16177e-25
	UQCRC1	CD8.08	0.743	0.26	0.596068	3.57806e-40	8.17873e-36
	AC011603.2	CD8.08	0.34	0.025	0.594313	5.15701e-164	1.17879e-159
	CENPN	CD8.08	0.432	0.013	0.593723	0	0
	C19orf48	CD8.08	0.447	0.054	0.593491	2.76877e-123	6.32885e-119
	KIFC1	CD8.08	0.33	0.001	0.593291	0	0
	ATP1B3	CD8.08	0.699	0.18	0.592541	3.07546e-60	7.02989e-56
	LIMS1	CD8.08	0.558	0.097	0.591921	8.09492e-92	1.85034e-87
	MMADHC	CD8.08	0.684	0.235	0.591586	1.08288e-36	2.47524e-32
	PTGES3	CD8.08	0.913	0.583	0.591065	2.03453e-23	4.65053e-19
	CTNNAL1	CD8.08	0.364	0.008	0.591035	0	0
	RALY	CD8.08	0.874	0.44	0.590585	3.21506e-27	7.34899e-23
	MBD2	CD8.08	0.66	0.207	0.588299	1.92061e-43	4.39012e-39
	HINT2	CD8.08	0.665	0.158	0.588297	2.79939e-66	6.39884e-62
	SUZ12	CD8.08	0.665	0.2	0.587787	1.17663e-44	2.68954e-40
	NCAPH	CD8.08	0.35	0.005	0.58732	0	0
	COPE	CD8.08	0.85	0.445	0.58314	1.17881e-26	2.69453e-22
	PPA1	CD8.08	0.738	0.277	0.581692	8.54319e-36	1.9528e-31
	MIF	CD8.08	0.966	0.816	0.581306	2.51403e-21	5.74658e-17
	HNRNPUL2	CD8.08	0.636	0.205	0.579902	1.11755e-38	2.5545e-34
	EIF3A	CD8.08	0.782	0.307	0.57969	1.29542e-35	2.96106e-31
	RMI2	CD8.08	0.359	0.003	0.578048	0	0
	POLR2E	CD8.08	0.748	0.296	0.577231	7.72974e-33	1.76686e-28
	CDCA8	CD8.08	0.267	0.006	0.575188	0	0
	GNAS	CD8.08	0.854	0.629	0.574841	6.1322e-18	1.4017e-13
	ADSL	CD8.08	0.636	0.158	0.574613	6.65623e-60	1.52148e-55
	HIRIP3	CD8.08	0.456	0.048	0.574525	7.54669e-146	1.72502e-141
	SLIRP	CD8.08	0.694	0.193	0.573865	4.88498e-53	1.11661e-48
	SDF2L1	CD8.08	0.699	0.227	0.571586	1.77311e-42	4.05297e-38
	FAM111B	CD8.08	0.345	0	0.569708	0	0
	MAZ	CD8.08	0.699	0.308	0.568607	8.11674e-25	1.85532e-20
	DNAJC15	CD8.08	0.68	0.198	0.568043	1.73895e-49	3.97489e-45
	GLRX3	CD8.08	0.641	0.13	0.567217	7.3547e-82	1.68114e-77
	NDUFB2	CD8.08	0.927	0.57	0.565922	1.35303e-25	3.09275e-21
	COX7A2	CD8.08	0.966	0.669	0.563553	3.58864e-25	8.20292e-21
	MRPL13	CD8.08	0.592	0.106	0.562143	6.61986e-92	1.51317e-87
	GLRX5	CD8.08	0.675	0.196	0.561816	5.838e-48	1.33445e-43
	HIST1H2AH	CD8.08	0.257	0.016	0.56132	4.9965e-148	1.1421e-143
	GTF3C6	CD8.08	0.733	0.212	0.561179	1.95442e-51	4.46741e-47
	HIST1H2AM	CD8.08	0.306	0.052	0.561095	4.60796e-56	1.05329e-51
	SNRPC	CD8.08	0.762	0.284	0.559966	1.3397e-35	3.06229e-31
	CCT8	CD8.08	0.782	0.285	0.558834	1.23834e-37	2.8306e-33
	SUMO1	CD8.08	0.864	0.361	0.558428	3.13216e-30	7.15949e-26
	HIST1H2AL	CD8.08	0.291	0.018	0.556731	3.99471e-176	9.1311e-172
	KPNA2	CD8.08	0.393	0.071	0.55659	1.06262e-63	2.42893e-59
	SAC3D1	CD8.08	0.345	0.024	0.55594	6.51579e-176	1.48938e-171
	PSMB1	CD8.08	0.874	0.499	0.555068	6.01258e-22	1.37436e-17
	PSIP1	CD8.08	0.859	0.365	0.554693	3.48336e-30	7.96227e-26
	RAB1B	CD8.08	0.772	0.29	0.554147	2.97042e-34	6.7898e-30
	MIR4435-2HG	CD8.08	0.592	0.115	0.551643	1.48376e-81	3.39158e-77
	BRCA2	CD8.08	0.359	0.011	0.550642	0	0
	YEATS4	CD8.08	0.505	0.071	0.550538	6.78344e-112	1.55056e-107
	NUTF2	CD8.08	0.806	0.257	0.547412	5.30674e-46	1.21302e-41
	MAD2L2	CD8.08	0.617	0.155	0.547128	1.5184e-55	3.47076e-51
	VDAC3	CD8.08	0.777	0.249	0.546489	2.80603e-44	6.41402e-40
	NDUFA13	CD8.08	0.845	0.57	0.545579	1.0755e-19	2.45838e-15
	GGH	CD8.08	0.383	0.012	0.545388	0	0
	CDC6	CD8.08	0.364	0.001	0.544676	0	0
	VBP1	CD8.08	0.626	0.14	0.544627	9.54338e-68	2.18143e-63
	TAF15	CD8.08	0.738	0.293	0.544334	7.68947e-30	1.75766e-25
	CD99	CD8.08	0.981	0.817	0.544108	2.47607e-22	5.6598e-18
	PLK1	CD8.08	0.248	0.002	0.544042	0	0
	C12orf75	CD8.08	0.888	0.481	0.543547	1.29105e-24	2.95107e-20
	RPA1	CD8.08	0.573	0.126	0.543349	8.35837e-66	1.91056e-61
	RAD51AP1	CD8.08	0.33	0.004	0.541829	0	0
	CDKN2A	CD8.08	0.417	0.047	0.541512	7.79111e-123	1.78089e-118
	ROMO1	CD8.08	0.825	0.369	0.54119	6.34887e-29	1.45122e-24
	PPP1R14B	CD8.08	0.485	0.117	0.541071	3.52146e-51	8.04936e-47
	PRDX2	CD8.08	0.796	0.415	0.540804	2.44051e-21	5.57852e-17
	ARHGDIA	CD8.08	0.854	0.479	0.540401	5.00281e-22	1.14354e-17
	RIF1	CD8.08	0.515	0.103	0.540301	4.04793e-68	9.25275e-64
	RBM3	CD8.08	0.913	0.67	0.539864	1.61379e-20	3.68881e-16
	SERBP1	CD8.08	0.864	0.448	0.539336	1.03687e-24	2.37008e-20
	PSMG2	CD8.08	0.718	0.233	0.539206	1.22457e-42	2.79912e-38
	PSMD1	CD8.08	0.568	0.117	0.537781	5.37899e-72	1.22953e-67
	ETFB	CD8.08	0.65	0.197	0.537077	2.64662e-43	6.04966e-39
	NDUFB4	CD8.08	0.84	0.43	0.536893	9.91345e-24	2.26602e-19
	ACTR2	CD8.08	0.859	0.432	0.53583	6.77067e-25	1.54764e-20
	FKBP3	CD8.08	0.602	0.14	0.535361	4.64804e-62	1.06245e-57
	NCAPD3	CD8.08	0.403	0.055	0.535352	1.54186e-93	3.52439e-89
	CIAO2A	CD8.08	0.689	0.175	0.535225	1.00714e-58	2.30213e-54
	RAC2	CD8.08	0.976	0.852	0.534872	2.62398e-21	5.9979e-17
	GPI	CD8.08	0.743	0.374	0.534836	5.35524e-22	1.2241e-17
	LAGE3	CD8.08	0.641	0.15	0.534654	7.44424e-65	1.7016e-60
	CYC1	CD8.08	0.709	0.26	0.533159	7.29898e-34	1.6684e-29
	ELOB	CD8.08	0.942	0.716	0.532119	1.21867e-22	2.78564e-18
	SNRPA	CD8.08	0.772	0.328	0.531867	1.08747e-28	2.48573e-24
	RECQL	CD8.08	0.67	0.2	0.52968	2.28529e-43	5.22371e-39
	THOC3	CD8.08	0.646	0.135	0.528749	4.09534e-78	9.36112e-74
	KPNB1	CD8.08	0.777	0.278	0.528637	3.49603e-37	7.99123e-33
	PAQR4	CD8.08	0.354	0.006	0.528383	0	0
	UBE2I	CD8.08	0.845	0.401	0.527815	2.16951e-25	4.95906e-21
	ATG3	CD8.08	0.665	0.169	0.527782	3.37477e-57	7.71406e-53
	AHCY	CD8.08	0.447	0.072	0.52769	2.20798e-83	5.047e-79
	EBP	CD8.08	0.626	0.139	0.527668	4.22379e-69	9.65473e-65
	PSMC3	CD8.08	0.714	0.203	0.527167	4.2315e-50	9.67236e-46
	PPIB	CD8.08	0.927	0.774	0.526606	6.39441e-18	1.46163e-13
	ATP5MG	CD8.08	0.966	0.87	0.526182	6.5517e-27	1.49759e-22
	NCAPG2	CD8.08	0.32	0.01	0.526151	0	0
	RBBP7	CD8.08	0.699	0.252	0.524151	1.59856e-33	3.65398e-29
	SPCS3	CD8.08	0.728	0.295	0.523608	3.81661e-28	8.72402e-24
	COA3	CD8.08	0.602	0.128	0.522289	1.43874e-70	3.28866e-66
	TRIM28	CD8.08	0.607	0.171	0.522205	7.11348e-46	1.626e-41
	PSMG1	CD8.08	0.481	0.054	0.521807	8.36284e-139	1.91158e-134
	KIF11	CD8.08	0.306	0.004	0.520294	0	0
	HLA-DQA1	CD8.08	0.369	0.073	0.520133	3.93553e-52	8.99585e-48
	GBP1	CD8.08	0.553	0.122	0.520095	2.30857e-64	5.27693e-60
	RAD23B	CD8.08	0.67	0.18	0.518302	1.021e-52	2.33381e-48
	CANX	CD8.08	0.782	0.344	0.518196	4.09783e-26	9.36681e-22
	ATAD5	CD8.08	0.383	0.024	0.517464	5.00483e-219	1.144e-214
	HLA-DQB1	CD8.08	0.432	0.097	0.51648	4.67304e-51	1.06816e-46
	CKAP2L	CD8.08	0.238	0.001	0.516072	0	0
	ARPC4	CD8.08	0.801	0.417	0.51597	2.42159e-22	5.53527e-18
	TIMM8B	CD8.08	0.617	0.143	0.514446	1.17218e-63	2.67936e-59
	NDUFS5	CD8.08	0.908	0.546	0.513189	7.9908e-21	1.82654e-16
	HSBP1	CD8.08	0.583	0.1	0.512732	1.6154e-94	3.69248e-90
	EWSR1	CD8.08	0.786	0.393	0.512008	6.58497e-23	1.50519e-18
	UBE2L3	CD8.08	0.782	0.329	0.511552	1.45066e-27	3.31593e-23
	PRELID1	CD8.08	0.845	0.465	0.511442	1.63554e-22	3.73851e-18
	CSNK2B	CD8.08	0.806	0.433	0.510107	2.72955e-22	6.23921e-18
	COX6B1	CD8.08	0.932	0.72	0.509696	4.9178e-23	1.12411e-18
	RACGAP1	CD8.08	0.311	0.015	0.50842	5.7266e-236	1.30899e-231
	SEC61B	CD8.08	0.888	0.544	0.507912	5.23844e-21	1.1974e-16
	SH2D1A	CD8.08	0.675	0.247	0.507589	2.79292e-32	6.38405e-28
	MSH6	CD8.08	0.413	0.036	0.507576	9.13788e-165	2.08874e-160
	UBE2A	CD8.08	0.65	0.15	0.505161	1.94858e-66	4.45406e-62
	ACAA2	CD8.08	0.714	0.223	0.504637	1.34734e-42	3.07975e-38
	CHAF1A	CD8.08	0.359	0.02	0.504408	9.65125e-234	2.20608e-229
	HIST1H2AG	CD8.08	0.364	0.054	0.50127	8.44617e-77	1.93063e-72
	NDC80	CD8.08	0.311	0.02	0.501158	4.11714e-177	9.41096e-173
	PSMD2	CD8.08	0.694	0.205	0.500961	7.05939e-45	1.61364e-40
	MPC2	CD8.08	0.718	0.234	0.500931	1.94757e-39	4.45175e-35
	DCXR	CD8.08	0.767	0.277	0.500875	5.28068e-34	1.20706e-29
	ATP5IF1	CD8.08	0.927	0.563	0.500853	5.35335e-21	1.22367e-16
	RHOA	CD8.08	0.976	0.803	0.500429	6.89948e-23	1.57708e-18
	NOP10	CD8.08	0.748	0.268	0.499854	8.8107e-35	2.01395e-30
	MRPS16	CD8.08	0.597	0.123	0.499802	5.77809e-74	1.32076e-69
	MND1	CD8.08	0.311	0.001	0.499634	0	0
	UFD1	CD8.08	0.728	0.219	0.499428	3.20981e-45	7.33698e-41
	ETFA	CD8.08	0.665	0.204	0.498971	1.28901e-42	2.94643e-38
	TMEM258	CD8.08	0.937	0.596	0.498373	1.23915e-21	2.83244e-17
	TPR	CD8.08	0.801	0.374	0.498243	5.07674e-25	1.16044e-20
	HAUS4	CD8.08	0.515	0.065	0.498174	1.786e-129	4.08243e-125
	RNASEH2C	CD8.08	0.636	0.153	0.497878	6.00915e-60	1.37357e-55
	TKT	CD8.08	0.694	0.26	0.497524	1.07332e-29	2.45339e-25
	BOLA3	CD8.08	0.646	0.157	0.496999	1.17314e-59	2.68156e-55
	XRCC6	CD8.08	0.835	0.462	0.496309	1.12085e-19	2.56205e-15
	OSTC	CD8.08	0.767	0.293	0.495839	3.25621e-32	7.44303e-28
	MICOS10	CD8.08	0.728	0.351	0.494617	5.34658e-21	1.22212e-16
	RAD51	CD8.08	0.359	0.001	0.494314	0	0
	GMFG	CD8.08	0.951	0.722	0.492805	2.91927e-20	6.67288e-16
	ITM2A	CD8.08	0.646	0.348	0.492422	1.85343e-13	4.23656e-09
	CD38	CD8.08	0.282	0.018	0.491817	2.08701e-156	4.77048e-152
	MRPL12	CD8.08	0.505	0.078	0.491288	4.57514e-96	1.04579e-91
	ITGB1BP1	CD8.08	0.704	0.235	0.491273	8.02685e-37	1.83478e-32
	MRPL27	CD8.08	0.515	0.076	0.491259	2.92542e-104	6.68692e-100
	ISG15	CD8.08	0.641	0.211	0.491193	5.09813e-36	1.16533e-31
	PTBP1	CD8.08	0.626	0.191	0.490556	1.2029e-40	2.74959e-36
	HSD17B10	CD8.08	0.675	0.178	0.489723	3.2352e-53	7.39502e-49
	PXMP2	CD8.08	0.413	0.028	0.488068	1.92402e-214	4.39792e-210
	ITGAE	CD8.08	0.583	0.133	0.4878	3.1417e-61	7.1813e-57
	TESC	CD8.08	0.495	0.083	0.486884	4.00621e-84	9.1574e-80
	SUMO2	CD8.08	0.971	0.77	0.486858	2.22938e-20	5.09593e-16
	HSPA8	CD8.08	0.976	0.857	0.486716	2.73346e-19	6.24813e-15
	HADH	CD8.08	0.5	0.076	0.486187	8.62505e-98	1.97151e-93
	PCMT1	CD8.08	0.704	0.214	0.485772	1.95787e-43	4.4753e-39
	NDUFS2	CD8.08	0.67	0.196	0.485242	1.89749e-44	4.33728e-40
	CENPE	CD8.08	0.243	0.008	0.484691	2.91762e-261	6.6691e-257
	POLD2	CD8.08	0.524	0.095	0.483844	1.02647e-79	2.34631e-75
	AL133415.1	CD8.08	0.481	0.103	0.483776	3.39728e-59	7.76551e-55
	BAX	CD8.08	0.83	0.425	0.483622	4.32883e-22	9.89484e-18
	FIBP	CD8.08	0.675	0.18	0.48338	4.06086e-53	9.28231e-49
	COX16	CD8.08	0.733	0.231	0.483221	3.04811e-42	6.96737e-38
	POLD1	CD8.08	0.359	0.029	0.48302	2.52229e-158	5.76546e-154
	RTN3	CD8.08	0.539	0.141	0.482858	8.64709e-46	1.97655e-41
	DHX15	CD8.08	0.549	0.112	0.48244	3.05244e-69	6.97726e-65
	P4HB	CD8.08	0.84	0.423	0.48086	4.97111e-21	1.1363e-16
	NPM1	CD8.08	0.985	0.872	0.48006	2.78149e-18	6.35793e-14
	ARL6IP6	CD8.08	0.524	0.126	0.478991	2.24564e-51	5.13309e-47
	BUB3	CD8.08	0.85	0.405	0.478529	3.21452e-21	7.34776e-17
	COX20	CD8.08	0.631	0.153	0.478442	7.78715e-59	1.77999e-54
	CDCA5	CD8.08	0.252	0.001	0.475608	0	0
	YWHAB	CD8.08	0.966	0.789	0.474423	7.9344e-22	1.81365e-17
	PSMC5	CD8.08	0.801	0.375	0.47375	5.92482e-23	1.35429e-18
	MCMBP	CD8.08	0.471	0.079	0.473294	1.05519e-81	2.41196e-77
	E2F2	CD8.08	0.291	0.002	0.472995	0	0
	TMEM167A	CD8.08	0.524	0.108	0.472179	1.43596e-66	3.28232e-62
	RPS17	CD8.08	0.845	0.555	0.47071	6.58122e-15	1.50434e-10
	HNRNPA1	CD8.08	0.99	0.905	0.470577	2.24057e-22	5.12148e-18
	PYCARD	CD8.08	0.718	0.242	0.470024	9.25068e-37	2.11452e-32
	LSM7	CD8.08	0.874	0.485	0.469694	1.94526e-20	4.44647e-16
	NDUFB1	CD8.08	0.786	0.354	0.469519	1.93221e-23	4.41663e-19
	NDUFB10	CD8.08	0.845	0.473	0.469473	1.23808e-15	2.83e-11
	TOMM5	CD8.08	0.811	0.371	0.46878	3.63535e-24	8.30968e-20
	WDR76	CD8.08	0.369	0.027	0.468583	1.46082e-179	3.33914e-175
	BAZ1B	CD8.08	0.607	0.17	0.468181	5.48714e-46	1.25425e-41
	NDUFB8	CD8.08	0.777	0.472	0.468118	1.53026e-15	3.49786e-11
	ZCRB1	CD8.08	0.563	0.129	0.467747	6.28907e-59	1.43755e-54
	OSTF1	CD8.08	0.806	0.375	0.466869	1.05922e-22	2.42117e-18
	SNRNP40	CD8.08	0.597	0.16	0.466843	1.0816e-46	2.47232e-42
	MCUR1	CD8.08	0.471	0.07	0.466405	1.88881e-95	4.31745e-91
	KIF15	CD8.08	0.238	0	0.466371	0	0
	ILF3	CD8.08	0.728	0.277	0.466154	2.17225e-29	4.96534e-25
	STOML2	CD8.08	0.67	0.174	0.465613	2.00926e-54	4.59276e-50
	KIF20B	CD8.08	0.427	0.065	0.465376	1.14028e-85	2.60645e-81
	UBA2	CD8.08	0.655	0.22	0.465114	7.07866e-34	1.61804e-29
	RFC5	CD8.08	0.388	0.027	0.464186	1.96463e-198	4.49076e-194
	PSMA1	CD8.08	0.743	0.354	0.464022	3.02075e-21	6.90483e-17
[truncated: 876 more rows]

## Sheet: Table S6 - DA cluster DEGs
Table S6: Differentially expressed genes for differential abundance clusters (corresponding to Figure 2B)
	Gene	Cluster	pct.1	pct.2	avg_log2FC	p-value	Adjusted p-value
	KLRC2	Matched_Reactive-enriched	0.677	0.074	2.56485	0	0
	TYROBP	Matched_Reactive-enriched	0.464	0.077	1.82664	0	0
	TRGV2	Matched_Reactive-enriched	0.437	0.103	1.64265	0	0
	FCGR3A	Matched_Reactive-enriched	0.684	0.217	1.28238	0	0
	TRGV8	Matched_Reactive-enriched	0.348	0.063	1.15779	0	0
	KIR2DL3	Matched_Reactive-enriched	0.319	0.021	1.11937	0	0
	HOPX	Matched_Reactive-enriched	0.732	0.314	1.10578	0	0
	KLRF1	Matched_Reactive-enriched	0.498	0.12	1.10437	0	0
	GNLY	Matched_Reactive-enriched	0.931	0.514	1.09249	0	0
	GZMB	Matched_Reactive-enriched	0.857	0.404	1.03119	0	0
	PRF1	Matched_Reactive-enriched	0.91	0.529	0.9986	0	0
	EFHD2	Matched_Reactive-enriched	0.848	0.482	0.912427	0	0
	KLRC3	Matched_Reactive-enriched	0.295	0.031	0.900392	0	0
	KLRD1	Matched_Reactive-enriched	0.802	0.403	0.888273	0	0
	ABHD17A	Matched_Reactive-enriched	0.782	0.489	0.810801	0	0
	IFITM2	Matched_Reactive-enriched	0.913	0.733	0.781847	0	0
	NKG7	Matched_Reactive-enriched	1	0.786	0.778277	0	0
	RHOC	Matched_Reactive-enriched	0.533	0.243	0.774978	3.02645e-285	6.91787e-281
	CD63	Matched_Reactive-enriched	0.657	0.375	0.769093	1.80397e-265	4.12351e-261
	CST7	Matched_Reactive-enriched	0.98	0.739	0.765944	0	0
	IKZF2	Matched_Reactive-enriched	0.262	0.035	0.764244	0	0
	PLAC8	Matched_Reactive-enriched	0.536	0.292	0.755205	1.17151e-211	2.67784e-207
	CTSW	Matched_Reactive-enriched	0.946	0.801	0.74991	0	0
	S1PR5	Matched_Reactive-enriched	0.483	0.201	0.746975	7.52764e-286	1.72067e-281
	GZMH	Matched_Reactive-enriched	0.947	0.56	0.714014	0	0
	TIGIT	Matched_Reactive-enriched	0.438	0.191	0.712974	2.56738e-236	5.86851e-232
	PTGDR	Matched_Reactive-enriched	0.46	0.204	0.711134	2.44629e-241	5.59172e-237
	CX3CR1	Matched_Reactive-enriched	0.502	0.222	0.710178	1.11225e-249	2.54239e-245
	TTC38	Matched_Reactive-enriched	0.407	0.15	0.706903	1.52167e-286	3.47824e-282
	ADGRG1	Matched_Reactive-enriched	0.563	0.252	0.688927	1.74401e-271	3.98647e-267
	CMC1	Matched_Reactive-enriched	0.747	0.415	0.677866	7.83019e-263	1.78982e-258
	TBX21	Matched_Reactive-enriched	0.525	0.255	0.674521	4.03081e-227	9.21362e-223
	CD300A	Matched_Reactive-enriched	0.352	0.126	0.671833	3.74138e-259	8.55204e-255
	ITGB2	Matched_Reactive-enriched	0.93	0.749	0.65419	6.86309e-289	1.56876e-284
	CEP78	Matched_Reactive-enriched	0.386	0.16	0.65379	1.41587e-220	3.2364e-216
	TRDC	Matched_Reactive-enriched	0.095	0.014	0.651107	1.61891e-201	3.7005e-197
	LAIR2	Matched_Reactive-enriched	0.299	0.103	0.646528	2.18603e-220	4.99683e-216
	ZEB2	Matched_Reactive-enriched	0.578	0.301	0.629821	1.80609e-209	4.12837e-205
	FGR	Matched_Reactive-enriched	0.41	0.172	0.627131	2.64274e-218	6.04077e-214
	CYBA	Matched_Reactive-enriched	0.97	0.89	0.624857	0	0
	IL2RB	Matched_Reactive-enriched	0.415	0.206	0.615954	2.39888e-169	5.48335e-165
	AOAH	Matched_Reactive-enriched	0.49	0.242	0.612939	1.91894e-197	4.38631e-193
	CD160	Matched_Reactive-enriched	0.238	0.071	0.608879	9.22089e-225	2.10771e-220
	KLRG1	Matched_Reactive-enriched	0.684	0.422	0.596863	1.41296e-185	3.22975e-181
	FGFBP2	Matched_Reactive-enriched	0.741	0.41	0.595706	2.44569e-212	5.59035e-208
	APMAP	Matched_Reactive-enriched	0.652	0.395	0.589939	1.30104e-184	2.97392e-180
	FCRL6	Matched_Reactive-enriched	0.533	0.272	0.585344	2.6185e-196	5.98537e-192
	XCL2	Matched_Reactive-enriched	0.31	0.12	0.576553	1.62223e-188	3.7081e-184
	TGFB1	Matched_Reactive-enriched	0.819	0.614	0.565612	1.58303e-177	3.61849e-173
	PLEK	Matched_Reactive-enriched	0.7	0.422	0.564846	5.04262e-184	1.15264e-179
	NCR1	Matched_Reactive-enriched	0.194	0.033	0.564058	0	0
	MATK	Matched_Reactive-enriched	0.604	0.359	0.562173	1.26903e-168	2.90074e-164
	SH2D2A	Matched_Reactive-enriched	0.48	0.278	0.550705	6.99593e-133	1.59913e-128
	HLA-DQA2	Matched_Reactive-enriched	0.217	0.057	0.54203	1.66582e-244	3.80774e-240
	NCR3	Matched_Reactive-enriched	0.288	0.122	0.541193	4.27981e-149	9.78279e-145
	GZMA	Matched_Reactive-enriched	0.966	0.699	0.538965	8.15472e-207	1.86401e-202
	CXXC5	Matched_Reactive-enriched	0.185	0.038	0.538548	4.28866e-280	9.80302e-276
	MBP	Matched_Reactive-enriched	0.686	0.474	0.53286	3.57674e-145	8.17572e-141
	CD81	Matched_Reactive-enriched	0.762	0.514	0.524973	2.07379e-164	4.74028e-160
	SLC9A3R1	Matched_Reactive-enriched	0.799	0.578	0.522444	8.63003e-166	1.97265e-161
	RASSF1	Matched_Reactive-enriched	0.548	0.336	0.515003	1.20281e-132	2.74938e-128
	ARPC5L	Matched_Reactive-enriched	0.623	0.415	0.512441	9.66301e-131	2.20877e-126
	CCL5	Matched_Reactive-enriched	0.996	0.822	0.506491	3.0827e-229	7.04643e-225
	CAPNS1	Matched_Reactive-enriched	0.526	0.331	0.504417	3.28615e-122	7.51148e-118
	CTSD	Matched_Reactive-enriched	0.563	0.37	0.496404	1.61952e-119	3.7019e-115
	ARL4C	Matched_Reactive-enriched	0.851	0.653	0.493527	4.47038e-153	1.02184e-148
	CLIC3	Matched_Reactive-enriched	0.337	0.181	0.490844	1.2541e-98	2.86663e-94
	TPST2	Matched_Reactive-enriched	0.57	0.37	0.482722	4.14049e-118	9.46434e-114
	PYHIN1	Matched_Reactive-enriched	0.484	0.275	0.482244	1.0646e-128	2.43346e-124
	GNAI2	Matched_Reactive-enriched	0.768	0.56	0.481394	5.0183e-137	1.14708e-132
	METRNL	Matched_Reactive-enriched	0.228	0.082	0.47976	1.10541e-157	2.52674e-153
	KLRB1	Matched_Reactive-enriched	0.349	0.235	0.471354	2.05739e-45	4.70278e-41
	IFITM3	Matched_Reactive-enriched	0.465	0.297	0.469829	1.06769e-87	2.44054e-83
	CTSC	Matched_Reactive-enriched	0.712	0.477	0.468204	7.91286e-139	1.80872e-134
	CCL3	Matched_Reactive-enriched	0.156	0.046	0.466645	3.11268e-146	7.11497e-142
	HLA-A	Matched_Reactive-enriched	0.998	0.989	0.466137	0	0
	ZBTB7A	Matched_Reactive-enriched	0.425	0.26	0.465665	3.628e-95	8.29289e-91
	C1orf21	Matched_Reactive-enriched	0.396	0.204	0.464695	4.25115e-124	9.71728e-120
	CLIC1	Matched_Reactive-enriched	0.892	0.713	0.462198	2.53267e-161	5.78917e-157
	CD247	Matched_Reactive-enriched	0.648	0.465	0.461614	3.84834e-106	8.79654e-102
	TLN1	Matched_Reactive-enriched	0.596	0.416	0.458961	4.13793e-102	9.45848e-98
	DOK2	Matched_Reactive-enriched	0.521	0.325	0.458798	4.16739e-110	9.52582e-106
	ARHGAP9	Matched_Reactive-enriched	0.513	0.335	0.456314	7.40045e-99	1.6916e-94
	FCER1G	Matched_Reactive-enriched	0.056	0.036	0.454801	1.77495e-09	4.05718e-05
	SPN	Matched_Reactive-enriched	0.522	0.337	0.450243	7.19868e-101	1.64548e-96
	MYO1F	Matched_Reactive-enriched	0.478	0.293	0.445756	3.98854e-100	9.11701e-96
	SEPTIN7	Matched_Reactive-enriched	0.744	0.582	0.445624	7.15601e-108	1.63572e-103
	LITAF	Matched_Reactive-enriched	0.864	0.704	0.445576	3.61672e-134	8.26709e-130
	SRGN	Matched_Reactive-enriched	0.892	0.724	0.445059	7.99718e-135	1.828e-130
	G6PD	Matched_Reactive-enriched	0.341	0.181	0.443511	5.78009e-107	1.32121e-102
	PTPN12	Matched_Reactive-enriched	0.233	0.095	0.440976	7.18789e-125	1.64301e-120
	SSBP4	Matched_Reactive-enriched	0.595	0.399	0.44058	4.41856e-108	1.00999e-103
	ABI3	Matched_Reactive-enriched	0.372	0.208	0.440107	8.18685e-98	1.87135e-93
	PLAAT4	Matched_Reactive-enriched	0.787	0.629	0.439178	4.47383e-113	1.02263e-108
	ADAM8	Matched_Reactive-enriched	0.318	0.163	0.436429	1.12342e-104	2.56791e-100
	IGF2R	Matched_Reactive-enriched	0.34	0.185	0.428785	2.24383e-96	5.12894e-92
	FCRL3	Matched_Reactive-enriched	0.223	0.088	0.422338	5.65163e-125	1.29185e-120
	CAST	Matched_Reactive-enriched	0.621	0.452	0.420205	1.50401e-87	3.43786e-83
	PTPN6	Matched_Reactive-enriched	0.477	0.333	0.420187	9.5822e-68	2.1903e-63
	KIR3DL2	Matched_Reactive-enriched	0.11	0.02	0.420147	2.07976e-192	4.75392e-188
	ARPC2	Matched_Reactive-enriched	0.944	0.846	0.418571	2.67481e-155	6.11407e-151
	IL2RG	Matched_Reactive-enriched	0.862	0.714	0.415185	1.30314e-118	2.97873e-114
	TRGC1	Matched_Reactive-enriched	0.155	0.048	0.409565	3.13066e-136	7.15605e-132
	YPEL3	Matched_Reactive-enriched	0.65	0.482	0.40923	2.59166e-83	5.92401e-79
	CCL4L2	Matched_Reactive-enriched	0.222	0.096	0.407363	6.03078e-101	1.37852e-96
	ANXA6	Matched_Reactive-enriched	0.709	0.558	0.404134	2.13762e-86	4.88617e-82
	MAPK1	Matched_Reactive-enriched	0.366	0.215	0.402215	1.09133e-84	2.49457e-80
	PIP4K2A	Matched_Reactive-enriched	0.485	0.33	0.399706	1.02339e-76	2.33926e-72
	GNPTAB	Matched_Reactive-enriched	0.309	0.173	0.399577	1.34829e-78	3.08193e-74
	UBE2F	Matched_Reactive-enriched	0.32	0.177	0.396687	7.72047e-86	1.76474e-81
	LPCAT1	Matched_Reactive-enriched	0.277	0.14	0.394909	1.19456e-90	2.73053e-86
	MXRA7	Matched_Reactive-enriched	0.275	0.142	0.39323	1.1303e-85	2.58364e-81
	KIR3DL1	Matched_Reactive-enriched	0.093	0.02	0.392368	1.47766e-134	3.37762e-130
	LYST	Matched_Reactive-enriched	0.323	0.187	0.391632	7.95446e-75	1.81823e-70
	SASH3	Matched_Reactive-enriched	0.442	0.285	0.391223	3.25483e-77	7.4399e-73
	SPON2	Matched_Reactive-enriched	0.424	0.266	0.390643	5.10073e-70	1.16592e-65
	APOBEC3G	Matched_Reactive-enriched	0.509	0.334	0.390265	6.33298e-84	1.44759e-79
	PFN1	Matched_Reactive-enriched	0.995	0.985	0.390203	3.78962e-210	8.66231e-206
	TGFBR3	Matched_Reactive-enriched	0.413	0.246	0.38925	4.79961e-82	1.0971e-77
	C5orf56	Matched_Reactive-enriched	0.36	0.213	0.388623	3.79529e-80	8.67528e-76
	SLC15A4	Matched_Reactive-enriched	0.227	0.105	0.388443	2.4557e-91	5.61323e-87
	KLRK1	Matched_Reactive-enriched	0.706	0.557	0.386328	4.51039e-78	1.03098e-73
	CDK2AP2	Matched_Reactive-enriched	0.446	0.292	0.386113	3.78714e-71	8.65665e-67
	ANXA2	Matched_Reactive-enriched	0.584	0.407	0.382448	1.97373e-81	4.51156e-77
	ADGRE5	Matched_Reactive-enriched	0.543	0.388	0.382279	3.70088e-69	8.45947e-65
	CSK	Matched_Reactive-enriched	0.569	0.412	0.380789	1.15255e-74	2.63449e-70
	VASP	Matched_Reactive-enriched	0.4	0.258	0.379813	4.77461e-71	1.09138e-66
	TNFSF12	Matched_Reactive-enriched	0.326	0.195	0.379539	7.42256e-70	1.69665e-65
	IQGAP1	Matched_Reactive-enriched	0.533	0.37	0.378583	1.53529e-77	3.50936e-73
	LGR6	Matched_Reactive-enriched	0.172	0.059	0.377824	2.28855e-125	5.23117e-121
	BIN2	Matched_Reactive-enriched	0.733	0.589	0.370598	7.15004e-78	1.63436e-73
	HLA-DRB5	Matched_Reactive-enriched	0.323	0.181	0.369734	9.43274e-77	2.15614e-72
	TRGC2	Matched_Reactive-enriched	0.208	0.089	0.369132	3.12877e-97	7.15175e-93
	PLAAT3	Matched_Reactive-enriched	0.261	0.133	0.368406	6.44867e-84	1.47404e-79
	ARPC4	Matched_Reactive-enriched	0.557	0.407	0.365036	1.16201e-69	2.65613e-65
	PKN1	Matched_Reactive-enriched	0.415	0.287	0.364744	3.48648e-57	7.96939e-53
	MCTP2	Matched_Reactive-enriched	0.236	0.113	0.363552	1.15686e-87	2.64434e-83
	DHRS7	Matched_Reactive-enriched	0.628	0.461	0.361599	5.92258e-80	1.35378e-75
	HLA-C	Matched_Reactive-enriched	1	0.997	0.3615	1.24415e-233	2.84388e-229
	PPP1CA	Matched_Reactive-enriched	0.776	0.649	0.360009	3.01185e-81	6.88448e-77
	PPP1R18	Matched_Reactive-enriched	0.608	0.435	0.359936	2.09085e-77	4.77926e-73
	CD99	Matched_Reactive-enriched	0.931	0.808	0.359818	2.03986e-118	4.6627e-114
	TAF10	Matched_Reactive-enriched	0.578	0.426	0.359522	8.66327e-64	1.98025e-59
	TRGV9	Matched_Reactive-enriched	0.091	0.056	0.358067	9.80437e-16	2.24108e-11
	JAZF1	Matched_Reactive-enriched	0.236	0.111	0.356424	1.87913e-89	4.29531e-85
	ZAP70	Matched_Reactive-enriched	0.627	0.481	0.356001	1.76175e-65	4.02702e-61
	CD164	Matched_Reactive-enriched	0.488	0.344	0.355875	4.08823e-64	9.34487e-60
	SIPA1	Matched_Reactive-enriched	0.362	0.237	0.355862	2.26035e-58	5.16671e-54
	ITGB7	Matched_Reactive-enriched	0.483	0.347	0.354507	2.78447e-57	6.36473e-53
	EOMES	Matched_Reactive-enriched	0.272	0.149	0.353245	1.10463e-71	2.52495e-67
	GNG2	Matched_Reactive-enriched	0.566	0.398	0.353063	3.60295e-73	8.23563e-69
	FLNA	Matched_Reactive-enriched	0.729	0.577	0.352768	2.27457e-73	5.19922e-69
	TNFRSF1B	Matched_Reactive-enriched	0.363	0.224	0.35132	1.91155e-66	4.36942e-62
	VAV3	Matched_Reactive-enriched	0.218	0.103	0.351038	1.44511e-82	3.30324e-78
	CD53	Matched_Reactive-enriched	0.685	0.542	0.35046	1.38411e-71	3.1638e-67
	RNASEK	Matched_Reactive-enriched	0.747	0.605	0.349964	3.25556e-70	7.44157e-66
	SUN2	Matched_Reactive-enriched	0.685	0.555	0.349791	1.68992e-63	3.86281e-59
	AGTRAP	Matched_Reactive-enriched	0.337	0.202	0.349633	2.29477e-67	5.24538e-63
	LSP1	Matched_Reactive-enriched	0.904	0.8	0.348107	1.02206e-100	2.33622e-96
	RNPEPL1	Matched_Reactive-enriched	0.434	0.305	0.347455	2.00498e-56	4.58298e-52
	MYO1G	Matched_Reactive-enriched	0.527	0.376	0.346902	8.19281e-62	1.87271e-57
	FMNL1	Matched_Reactive-enriched	0.466	0.327	0.344652	4.90409e-59	1.12098e-54
	MFSD10	Matched_Reactive-enriched	0.459	0.321	0.344479	7.96598e-59	1.82086e-54
	PIK3AP1	Matched_Reactive-enriched	0.149	0.044	0.34393	3.21614e-136	7.35145e-132
	CTBP1	Matched_Reactive-enriched	0.353	0.227	0.343773	4.102e-59	9.37635e-55
	MTSS1	Matched_Reactive-enriched	0.225	0.109	0.343692	4.88664e-79	1.11699e-74
	RAC2	Matched_Reactive-enriched	0.927	0.846	0.342099	3.81884e-96	8.72911e-92
	ADRB2	Matched_Reactive-enriched	0.275	0.148	0.341948	1.71814e-71	3.92733e-67
	TSEN54	Matched_Reactive-enriched	0.427	0.283	0.341697	8.05653e-65	1.84156e-60
	ARF6	Matched_Reactive-enriched	0.624	0.475	0.340141	4.08337e-65	9.33377e-61
	OSTF1	Matched_Reactive-enriched	0.511	0.365	0.339832	1.16981e-60	2.67396e-56
	CFL1	Matched_Reactive-enriched	0.988	0.957	0.338415	9.34638e-146	2.1364e-141
	IRF1	Matched_Reactive-enriched	0.575	0.43	0.338002	5.80406e-60	1.32669e-55
	MAP2K2	Matched_Reactive-enriched	0.474	0.337	0.334817	8.78696e-57	2.00852e-52
	CD244	Matched_Reactive-enriched	0.206	0.095	0.334607	3.72619e-82	8.51732e-78
	IQGAP2	Matched_Reactive-enriched	0.423	0.285	0.332293	9.10743e-59	2.08178e-54
	ATP2B4	Matched_Reactive-enriched	0.339	0.212	0.33192	1.9189e-57	4.38623e-53
	PRELID1	Matched_Reactive-enriched	0.591	0.456	0.329707	3.20864e-60	7.33431e-56
	ITGAM	Matched_Reactive-enriched	0.191	0.086	0.329053	4.14751e-78	9.48039e-74
	ACTG1	Matched_Reactive-enriched	0.977	0.941	0.326858	2.55989e-93	5.85141e-89
	WDR1	Matched_Reactive-enriched	0.599	0.456	0.326515	2.68138e-57	6.1291e-53
	ADD1	Matched_Reactive-enriched	0.365	0.244	0.325937	3.73036e-53	8.52685e-49
	FYN	Matched_Reactive-enriched	0.682	0.536	0.323699	2.50014e-59	5.71482e-55
	RASAL3	Matched_Reactive-enriched	0.515	0.389	0.323621	3.18056e-48	7.27013e-44
	ACADVL	Matched_Reactive-enriched	0.383	0.269	0.323156	5.21019e-47	1.19095e-42
	LAT2	Matched_Reactive-enriched	0.091	0.007	0.320506	0	0
	SYNE1	Matched_Reactive-enriched	0.526	0.379	0.32012	4.92999e-57	1.1269e-52
	GZMM	Matched_Reactive-enriched	0.846	0.714	0.319401	2.66956e-82	6.10209e-78
	ACTN4	Matched_Reactive-enriched	0.363	0.232	0.319178	2.11335e-58	4.8307e-54
	MAPRE2	Matched_Reactive-enriched	0.4	0.283	0.318904	1.72242e-45	3.93712e-41
	RAP2A	Matched_Reactive-enriched	0.197	0.095	0.318824	2.41422e-70	5.51843e-66
	SAMD3	Matched_Reactive-enriched	0.524	0.362	0.317526	1.95136e-66	4.46042e-62
	SLAMF7	Matched_Reactive-enriched	0.271	0.151	0.316855	9.41694e-65	2.15252e-60
	PABPN1	Matched_Reactive-enriched	0.522	0.381	0.316454	5.74342e-57	1.31283e-52
	PSMB10	Matched_Reactive-enriched	0.638	0.497	0.315118	5.86136e-59	1.33979e-54
	LCP1	Matched_Reactive-enriched	0.823	0.695	0.314963	2.158e-70	4.93276e-66
	MACF1	Matched_Reactive-enriched	0.452	0.324	0.314245	3.95914e-51	9.0498e-47
	HLA-E	Matched_Reactive-enriched	0.986	0.953	0.314192	1.95516e-130	4.4691e-126
	CCL4	Matched_Reactive-enriched	0.599	0.385	0.313214	8.87796e-82	2.02933e-77
	PDIA3	Matched_Reactive-enriched	0.718	0.595	0.313178	7.23058e-55	1.65277e-50
	OSBPL5	Matched_Reactive-enriched	0.149	0.054	0.312969	2.57728e-97	5.89115e-93
	CD320	Matched_Reactive-enriched	0.323	0.199	0.312796	7.31127e-57	1.67121e-52
	TRGV4	Matched_Reactive-enriched	0.147	0.066	0.3127	8.07177e-60	1.84505e-55
	ARHGAP25	Matched_Reactive-enriched	0.371	0.243	0.311972	1.42227e-54	3.25101e-50
	ARL6IP1	Matched_Reactive-enriched	0.615	0.479	0.311357	2.23623e-54	5.11158e-50
	PTPRC	Matched_Reactive-enriched	0.981	0.925	0.311113	9.0776e-120	2.07496e-115
	AC004687.1	Matched_Reactive-enriched	0.336	0.211	0.309994	5.95869e-55	1.36204e-50
	ACTR3	Matched_Reactive-enriched	0.659	0.519	0.308416	1.04332e-56	2.38481e-52
	RAC1	Matched_Reactive-enriched	0.564	0.437	0.30834	8.90744e-51	2.03606e-46
	HCST	Matched_Reactive-enriched	0.968	0.921	0.308061	1.08244e-93	2.47424e-89
	TPI1	Matched_Reactive-enriched	0.691	0.57	0.307336	4.59834e-53	1.05109e-48
	PTPN18	Matched_Reactive-enriched	0.291	0.18	0.307165	9.09098e-53	2.07802e-48
	SH2D1B	Matched_Reactive-enriched	0.055	0.006	0.307034	2.42431e-147	5.5415e-143
	SYNGR1	Matched_Reactive-enriched	0.187	0.091	0.306687	7.01711e-63	1.60397e-58
	PSMB9	Matched_Reactive-enriched	0.794	0.672	0.305951	4.07662e-63	9.31835e-59
	PTPN22	Matched_Reactive-enriched	0.317	0.2	0.305413	3.30164e-52	7.54689e-48
	SRSF9	Matched_Reactive-enriched	0.574	0.444	0.304707	1.06636e-49	2.43748e-45
	DGKZ	Matched_Reactive-enriched	0.448	0.327	0.304477	8.36512e-47	1.9121e-42
	SKAP1	Matched_Reactive-enriched	0.565	0.444	0.303825	6.06325e-47	1.38594e-42
	ACTB	Matched_Reactive-enriched	1	0.998	0.303268	1.46204e-114	3.34193e-110
	STARD3NL	Matched_Reactive-enriched	0.202	0.114	0.303122	7.40162e-47	1.69186e-42
	SYNE2	Matched_Reactive-enriched	0.69	0.535	0.302973	1.83187e-59	4.18729e-55
	FAM49B	Matched_Reactive-enriched	0.506	0.381	0.302938	2.56701e-46	5.86767e-42
	ITGAL	Matched_Reactive-enriched	0.434	0.295	0.302336	1.38564e-55	3.16729e-51
	CISD3	Matched_Reactive-enriched	0.331	0.217	0.301654	8.77549e-49	2.0059e-44
	BLOC1S1	Matched_Reactive-enriched	0.553	0.425	0.301341	4.14177e-50	9.46726e-46
	ACAA2	Matched_Reactive-enriched	0.325	0.218	0.300042	1.24574e-44	2.8475e-40
	STK10	Matched_Reactive-enriched	0.423	0.314	0.299049	2.07091e-41	4.73368e-37
	PRKCB	Matched_Reactive-enriched	0.43	0.314	0.298881	1.69209e-42	3.86778e-38
	USP28	Matched_Reactive-enriched	0.209	0.108	0.297695	8.75319e-62	2.0008e-57
	TAP1	Matched_Reactive-enriched	0.471	0.351	0.296851	7.29122e-43	1.66663e-38
	TCIRG1	Matched_Reactive-enriched	0.277	0.17	0.296846	2.39056e-50	5.46434e-46
	CDKN2D	Matched_Reactive-enriched	0.452	0.325	0.29591	9.52042e-49	2.17618e-44
	VAMP8	Matched_Reactive-enriched	0.585	0.464	0.295572	1.98527e-47	4.53793e-43
	SYTL1	Matched_Reactive-enriched	0.495	0.372	0.295561	1.11358e-44	2.54543e-40
	TBC1D10C	Matched_Reactive-enriched	0.672	0.551	0.295295	1.08159e-49	2.4723e-45
	RAB8B	Matched_Reactive-enriched	0.244	0.145	0.295112	2.10461e-48	4.81072e-44
	LAIR1	Matched_Reactive-enriched	0.233	0.129	0.294935	7.77521e-57	1.77726e-52
	KLF2	Matched_Reactive-enriched	0.928	0.837	0.293903	2.2099e-74	5.0514e-70
	CYB561D2	Matched_Reactive-enriched	0.299	0.191	0.293608	2.99001e-47	6.83456e-43
	F2R	Matched_Reactive-enriched	0.251	0.142	0.29337	4.1482e-56	9.48196e-52
	LYN	Matched_Reactive-enriched	0.119	0.036	0.293255	5.23807e-103	1.19732e-98
	BTN3A2	Matched_Reactive-enriched	0.437	0.313	0.293108	7.93644e-47	1.81411e-42
	MSN	Matched_Reactive-enriched	0.658	0.538	0.291672	1.34176e-47	3.06698e-43
	PTP4A2	Matched_Reactive-enriched	0.788	0.641	0.291539	2.99241e-66	6.84006e-62
	PRKACB	Matched_Reactive-enriched	0.39	0.282	0.291372	3.59302e-40	8.21292e-36
	MTPN	Matched_Reactive-enriched	0.436	0.323	0.291257	4.82813e-42	1.10361e-37
	PDLIM1	Matched_Reactive-enriched	0.139	0.048	0.291191	1.56557e-96	3.57858e-92
	RPS6KA1	Matched_Reactive-enriched	0.31	0.196	0.2904	4.65777e-50	1.06467e-45
	HLA-B	Matched_Reactive-enriched	1	0.999	0.290355	1.2871e-182	2.94204e-178
	ARPC1B	Matched_Reactive-enriched	0.813	0.702	0.28988	6.42739e-58	1.46917e-53
	DNAJC1	Matched_Reactive-enriched	0.389	0.263	0.289694	4.32886e-48	9.89491e-44
	JAK1	Matched_Reactive-enriched	0.791	0.684	0.287699	1.33974e-54	3.06238e-50
	CTBP2	Matched_Reactive-enriched	0.102	0.026	0.28732	4.69374e-116	1.0729e-111
	PTPN7	Matched_Reactive-enriched	0.262	0.163	0.286387	6.08179e-44	1.39018e-39
	SH3BP2	Matched_Reactive-enriched	0.177	0.09	0.286136	1.38857e-55	3.17398e-51
	CTDNEP1	Matched_Reactive-enriched	0.361	0.266	0.285432	1.01775e-34	2.32637e-30
	IFITM1	Matched_Reactive-enriched	0.985	0.954	0.285315	2.19295e-89	5.01265e-85
	RAB29	Matched_Reactive-enriched	0.351	0.238	0.285078	9.66358e-44	2.2089e-39
	GNAS	Matched_Reactive-enriched	0.753	0.62	0.283549	1.09701e-51	2.50756e-47
	PTPN4	Matched_Reactive-enriched	0.393	0.281	0.28354	3.55212e-42	8.11944e-38
	FBXW5	Matched_Reactive-enriched	0.426	0.313	0.283433	9.5688e-41	2.18724e-36
	PLEKHF1	Matched_Reactive-enriched	0.225	0.129	0.283351	6.48916e-48	1.48329e-43
	CALM1	Matched_Reactive-enriched	0.976	0.943	0.282349	2.72566e-96	6.23032e-92
	STOM	Matched_Reactive-enriched	0.33	0.219	0.2821	3.89851e-44	8.9112e-40
	FHL3	Matched_Reactive-enriched	0.123	0.043	0.282076	2.24334e-84	5.12782e-80
	RAB5IF	Matched_Reactive-enriched	0.41	0.295	0.280627	1.59023e-39	3.63495e-35
	TRAPPC10	Matched_Reactive-enriched	0.281	0.184	0.280432	3.36705e-40	7.6964e-36
	CALR	Matched_Reactive-enriched	0.682	0.591	0.280145	9.03758e-35	2.06581e-30
	YWHAZ	Matched_Reactive-enriched	0.9	0.815	0.279321	6.62993e-69	1.51547e-64
	NDUFB7	Matched_Reactive-enriched	0.587	0.452	0.278939	2.06502e-51	4.72023e-47
	ECH1	Matched_Reactive-enriched	0.436	0.327	0.27776	5.95334e-39	1.36081e-34
	PYCARD	Matched_Reactive-enriched	0.341	0.236	0.27774	6.47919e-40	1.48101e-35
	PXN	Matched_Reactive-enriched	0.341	0.235	0.277355	2.36022e-39	5.39499e-35
	ASCL2	Matched_Reactive-enriched	0.236	0.134	0.277217	7.4948e-49	1.71316e-44
	LGALS1	Matched_Reactive-enriched	0.549	0.388	0.277095	1.53871e-54	3.51718e-50
	PPP6R1	Matched_Reactive-enriched	0.287	0.199	0.277088	7.9635e-34	1.8203e-29
	CDC42	Matched_Reactive-enriched	0.751	0.648	0.277047	5.9911e-49	1.36945e-44
	PTMS	Matched_Reactive-enriched	0.234	0.134	0.276646	6.03866e-49	1.38032e-44
	FERMT3	Matched_Reactive-enriched	0.408	0.298	0.276642	5.71565e-39	1.30648e-34
	SKAP2	Matched_Reactive-enriched	0.167	0.077	0.276084	1.16709e-64	2.66774e-60
	KIAA2013	Matched_Reactive-enriched	0.204	0.114	0.275995	1.22387e-48	2.79753e-44
	PPP2R5C	Matched_Reactive-enriched	0.631	0.493	0.275771	2.4313e-51	5.55747e-47
	PDCD7	Matched_Reactive-enriched	0.24	0.152	0.275724	3.08062e-40	7.04167e-36
	RAB1B	Matched_Reactive-enriched	0.398	0.284	0.275213	4.07956e-42	9.32505e-38
	MIDN	Matched_Reactive-enriched	0.237	0.141	0.27456	9.2866e-47	2.12273e-42
	CRIP1	Matched_Reactive-enriched	0.825	0.714	0.27407	6.89114e-56	1.57518e-51
	PSAP	Matched_Reactive-enriched	0.512	0.396	0.273836	9.62713e-41	2.20057e-36
	LILRB1	Matched_Reactive-enriched	0.173	0.082	0.27306	4.16538e-62	9.52123e-58
	LMAN2	Matched_Reactive-enriched	0.483	0.363	0.272878	2.6958e-42	6.16207e-38
	PPP2R5A	Matched_Reactive-enriched	0.261	0.164	0.27285	1.62e-43	3.70299e-39
	ITM2A	Matched_Reactive-enriched	0.458	0.341	0.272468	5.92221e-41	1.3537e-36
	SERPINB6	Matched_Reactive-enriched	0.272	0.171	0.272193	5.8528e-45	1.33783e-40
	LCK	Matched_Reactive-enriched	0.807	0.717	0.271955	1.0793e-48	2.46705e-44
	BSG	Matched_Reactive-enriched	0.567	0.442	0.271904	9.77378e-45	2.23409e-40
	HLA-DPB1	Matched_Reactive-enriched	0.703	0.548	0.271672	8.76632e-54	2.00381e-49
	HIST1H1E	Matched_Reactive-enriched	0.689	0.565	0.271452	8.87692e-34	2.02909e-29
	MT2A	Matched_Reactive-enriched	0.702	0.568	0.270742	6.39732e-46	1.4623e-41
	FUT11	Matched_Reactive-enriched	0.19	0.1	0.270723	4.12211e-52	9.42232e-48
	RGS19	Matched_Reactive-enriched	0.398	0.28	0.270589	3.73643e-42	8.54073e-38
	LAMP1	Matched_Reactive-enriched	0.465	0.35	0.270485	1.1482e-39	2.62455e-35
	AHNAK	Matched_Reactive-enriched	0.743	0.598	0.270322	2.72116e-51	6.22003e-47
	DYRK1B	Matched_Reactive-enriched	0.135	0.051	0.269896	1.47247e-80	3.36578e-76
	FAM117A	Matched_Reactive-enriched	0.313	0.218	0.26974	1.12647e-35	2.57488e-31
	BZW1	Matched_Reactive-enriched	0.546	0.437	0.269198	9.78685e-35	2.23708e-30
	CXCR2	Matched_Reactive-enriched	0.085	0.015	0.26842	6.62495e-149	1.51433e-144
	ANXA4	Matched_Reactive-enriched	0.188	0.096	0.267608	1.82309e-56	4.16722e-52
	CASP1	Matched_Reactive-enriched	0.338	0.233	0.267461	1.05671e-39	2.41542e-35
	LRP10	Matched_Reactive-enriched	0.34	0.247	0.267339	1.54896e-32	3.54061e-28
	DDOST	Matched_Reactive-enriched	0.54	0.425	0.266916	2.01371e-40	4.60295e-36
	ARHGAP30	Matched_Reactive-enriched	0.432	0.331	0.266817	1.22189e-32	2.79299e-28
	MXD4	Matched_Reactive-enriched	0.263	0.166	0.266721	1.64994e-41	3.77144e-37
	CDC34	Matched_Reactive-enriched	0.179	0.095	0.265828	1.01389e-50	2.31755e-46
	SIGIRR	Matched_Reactive-enriched	0.513	0.408	0.265497	3.77652e-35	8.63237e-31
	TOX	Matched_Reactive-enriched	0.205	0.108	0.26527	1.74838e-54	3.99644e-50
	ARL6IP5	Matched_Reactive-enriched	0.803	0.688	0.264788	2.65876e-53	6.0774e-49
	CAP1	Matched_Reactive-enriched	0.683	0.567	0.26454	4.21985e-44	9.64573e-40
	SYTL3	Matched_Reactive-enriched	0.362	0.253	0.264485	6.6927e-38	1.52982e-33
	PURA	Matched_Reactive-enriched	0.266	0.181	0.264452	1.21237e-33	2.77124e-29
	PAXX	Matched_Reactive-enriched	0.708	0.584	0.264014	2.13981e-45	4.89118e-41
	MAP3K8	Matched_Reactive-enriched	0.27	0.167	0.263895	2.25529e-44	5.15515e-40
	PRSS23	Matched_Reactive-enriched	0.359	0.205	0.263801	1.18585e-68	2.71062e-64
	TSPAN32	Matched_Reactive-enriched	0.267	0.18	0.262114	1.68334e-34	3.84778e-30
	RAP1B	Matched_Reactive-enriched	0.792	0.672	0.262	2.78071e-56	6.35616e-52
	TMBIM4	Matched_Reactive-enriched	0.413	0.317	0.261996	1.15493e-31	2.63993e-27
	BOD1L1	Matched_Reactive-enriched	0.34	0.25	0.260882	1.44579e-30	3.30479e-26
	P4HB	Matched_Reactive-enriched	0.519	0.418	0.260093	1.57924e-33	3.60983e-29
	HMOX2	Matched_Reactive-enriched	0.413	0.302	0.259918	1.94694e-38	4.45032e-34
	PRR5	Matched_Reactive-enriched	0.291	0.198	0.259712	1.50999e-35	3.45154e-31
	HNRNPD	Matched_Reactive-enriched	0.487	0.379	0.259005	5.40397e-36	1.23524e-31
	ICAM3	Matched_Reactive-enriched	0.675	0.581	0.258526	3.47601e-36	7.94546e-32
	ZNF600	Matched_Reactive-enriched	0.157	0.074	0.25828	1.91073e-58	4.36755e-54
	TPM3	Matched_Reactive-enriched	0.868	0.78	0.257464	2.45438e-58	5.61021e-54
	IDH2	Matched_Reactive-enriched	0.396	0.283	0.257321	1.08923e-38	2.48976e-34
	ADAM10	Matched_Reactive-enriched	0.286	0.188	0.257053	4.8897e-40	1.11769e-35
	MYL6	Matched_Reactive-enriched	0.961	0.912	0.256654	3.06237e-78	6.99997e-74
	XBP1	Matched_Reactive-enriched	0.484	0.395	0.256564	4.81832e-27	1.10137e-22
	TMEM50A	Matched_Reactive-enriched	0.589	0.47	0.256358	1.32472e-39	3.02805e-35
	NEAT1	Matched_Reactive-enriched	0.449	0.346	0.256102	2.87715e-31	6.57659e-27
	TSR3	Matched_Reactive-enriched	0.277	0.183	0.255886	9.50581e-40	2.17284e-35
	DBI	Matched_Reactive-enriched	0.64	0.516	0.255021	2.07893e-45	4.75202e-41
	FEZ1	Matched_Reactive-enriched	0.103	0.03	0.254566	2.90549e-96	6.64138e-92
	PATL2	Matched_Reactive-enriched	0.239	0.147	0.254519	1.96022e-40	4.48067e-36
	DAXX	Matched_Reactive-enriched	0.253	0.168	0.254478	1.18459e-34	2.70774e-30
	CHST12	Matched_Reactive-enriched	0.361	0.246	0.254449	1.70835e-40	3.90495e-36
	RASSF4	Matched_Reactive-enriched	0.098	0.027	0.254434	9.77757e-100	2.23496e-95
	SIRT2	Matched_Reactive-enriched	0.233	0.141	0.254395	3.89495e-42	8.90307e-38
	SRRM2	Matched_Reactive-enriched	0.655	0.539	0.253849	4.46546e-39	1.02071e-34
	GRK2	Matched_Reactive-enriched	0.372	0.277	0.253773	6.55738e-31	1.49889e-26
	TADA3	Matched_Reactive-enriched	0.315	0.23	0.253166	6.35163e-29	1.45186e-24
	GLIPR1	Matched_Reactive-enriched	0.382	0.268	0.25298	3.92367e-40	8.96873e-36
	ARPC5	Matched_Reactive-enriched	0.637	0.522	0.252775	1.48518e-39	3.39482e-35
	HSH2D	Matched_Reactive-enriched	0.128	0.055	0.252759	8.3757e-60	1.91452e-55
	IDS	Matched_Reactive-enriched	0.51	0.395	0.25261	1.70017e-36	3.88626e-32
	RALGDS	Matched_Reactive-enriched	0.245	0.157	0.252078	8.80192e-36	2.01194e-31
	HNRNPUL2	Matched_Reactive-enriched	0.286	0.2	0.252069	1.24384e-31	2.84316e-27
	KLF13	Matched_Reactive-enriched	0.458	0.357	0.251906	4.54606e-32	1.03914e-27
	DIAPH1	Matched_Reactive-enriched	0.384	0.279	0.251307	1.30638e-35	2.98612e-31
	LLGL2	Matched_Reactive-enriched	0.191	0.107	0.250589	6.94058e-45	1.58648e-40
	CSNK1G2	Matched_Reactive-enriched	0.273	0.184	0.25039	9.49836e-35	2.17114e-30
	FCMR	Matched_Reactive-enriched	0.518	0.423	0.250244	1.14409e-27	2.61517e-23
	CAPN2	Matched_Reactive-enriched	0.471	0.357	0.250083	3.70596e-37	8.47109e-33
	MTRNR2L8	Matched_Unreactive-enriched	0.406	0.166	1.66044	0	0
	ZNF683	Matched_Unreactive-enriched	0.416	0.092	1.49773	0	0
	PRSS23	Matched_Unreactive-enriched	0.483	0.182	1.0726	0	0
	ITGB1	Matched_Unreactive-enriched	0.681	0.393	0.982253	0	0
	FGFBP2	Matched_Unreactive-enriched	0.666	0.407	0.979393	0	0
	SPON2	Matched_Unreactive-enriched	0.476	0.253	0.869873	1.20976e-260	2.76528e-256
	ADGRG1	Matched_Unreactive-enriched	0.464	0.252	0.716758	5.10337e-230	1.16653e-225
	EFHD2	Matched_Unreactive-enriched	0.718	0.484	0.70443	1.1845e-267	2.70752e-263
	ASCL2	Matched_Unreactive-enriched	0.31	0.12	0.656336	1.28646e-265	2.9406e-261
	PRF1	Matched_Unreactive-enriched	0.736	0.536	0.630027	5.23965e-206	1.19768e-201
	GZMH	Matched_Unreactive-enriched	0.722	0.573	0.619127	7.08286e-173	1.619e-168
	ZEB2	Matched_Unreactive-enriched	0.496	0.301	0.615475	3.8646e-180	8.83371e-176
	PROK2	Matched_Unreactive-enriched	0.174	0.029	0.590557	0	0
	GZMB	Matched_Unreactive-enriched	0.614	0.416	0.585599	1.49072e-154	3.40749e-150
	TBX21	Matched_Unreactive-enriched	0.44	0.255	0.569223	7.17332e-171	1.63968e-166
	SYNGR1	Matched_Unreactive-enriched	0.206	0.085	0.515254	8.46424e-154	1.93476e-149
	TLE5	Matched_Unreactive-enriched	0.865	0.734	0.487256	7.99357e-178	1.82717e-173
	KLRC4	Matched_Unreactive-enriched	0.404	0.269	0.483228	5.66155e-103	1.29412e-98
	CD81	Matched_Unreactive-enriched	0.721	0.509	0.482653	6.97864e-177	1.59518e-172
	LGALS1	Matched_Unreactive-enriched	0.554	0.381	0.47988	1.93774e-120	4.42928e-116
	KLF2	Matched_Unreactive-enriched	0.921	0.834	0.472647	1.9718e-204	4.50714e-200
	ITGA4	Matched_Unreactive-enriched	0.674	0.52	0.456413	3.60195e-137	8.23334e-133
	TGFB1	Matched_Unreactive-enriched	0.776	0.612	0.452677	1.2586e-147	2.87692e-143
	YPEL3	Matched_Unreactive-enriched	0.632	0.477	0.441449	3.05435e-121	6.98164e-117
	AHNAK	Matched_Unreactive-enriched	0.749	0.591	0.441384	6.41723e-131	1.46685e-126
	MYBL1	Matched_Unreactive-enriched	0.376	0.232	0.440353	2.42267e-109	5.53773e-105
	ABHD17A	Matched_Unreactive-enriched	0.66	0.492	0.434184	1.17882e-124	2.69454e-120
	NKG7	Matched_Unreactive-enriched	0.96	0.783	0.432148	2.95317e-169	6.75035e-165
	TNFRSF1B	Matched_Unreactive-enriched	0.347	0.22	0.42639	4.54052e-95	1.03787e-90
	MXRA7	Matched_Unreactive-enriched	0.256	0.139	0.414269	4.68044e-102	1.06985e-97
	SSBP4	Matched_Unreactive-enriched	0.528	0.4	0.414169	1.30726e-93	2.98813e-89
	HIST1H1E	Matched_Unreactive-enriched	0.699	0.558	0.413658	5.47582e-98	1.25166e-93
	CX3CR1	Matched_Unreactive-enriched	0.363	0.229	0.408312	3.49658e-92	7.99249e-88
	ARL4C	Matched_Unreactive-enriched	0.815	0.65	0.406958	1.44208e-146	3.29632e-142
	FCGR3A	Matched_Unreactive-enriched	0.371	0.239	0.396583	2.35928e-81	5.39285e-77
	KLRC1	Matched_Unreactive-enriched	0.109	0.039	0.392612	2.27653e-98	5.20369e-94
	LINC01578	Matched_Unreactive-enriched	0.66	0.502	0.388387	1.37569e-108	3.14455e-104
	MTSS1	Matched_Unreactive-enriched	0.21	0.106	0.385399	2.12711e-96	4.86216e-92
	CRIP1	Matched_Unreactive-enriched	0.834	0.709	0.380119	3.24757e-114	7.4233e-110
	TGFBR3	Matched_Unreactive-enriched	0.371	0.244	0.378328	1.24719e-84	2.85083e-80
	CST7	Matched_Unreactive-enriched	0.941	0.734	0.375355	3.53164e-137	8.07262e-133
	MXD4	Matched_Unreactive-enriched	0.269	0.162	0.3749	3.21074e-83	7.33911e-79
	GNAI2	Matched_Unreactive-enriched	0.695	0.561	0.373855	6.77613e-100	1.54889e-95
	SLC9A3R1	Matched_Unreactive-enriched	0.715	0.58	0.37283	7.50747e-100	1.71606e-95
	FLNA	Matched_Unreactive-enriched	0.707	0.574	0.372152	1.95709e-92	4.47353e-88
	LSP1	Matched_Unreactive-enriched	0.874	0.8	0.36674	4.14637e-110	9.47777e-106
	SSBP3	Matched_Unreactive-enriched	0.243	0.145	0.363951	1.34621e-75	3.07716e-71
	TRG-AS1	Matched_Unreactive-enriched	0.346	0.242	0.354859	7.9484e-63	1.81684e-58
	H1FX	Matched_Unreactive-enriched	0.505	0.416	0.353656	1.43571e-41	3.28174e-37
	IL2RG	Matched_Unreactive-enriched	0.833	0.711	0.352431	1.89435e-101	4.3301e-97
	IGF2R	Matched_Unreactive-enriched	0.289	0.186	0.352097	1.0753e-71	2.45792e-67
	FCRL6	Matched_Unreactive-enriched	0.404	0.278	0.35159	1.67508e-74	3.82889e-70
	VCL	Matched_Unreactive-enriched	0.218	0.12	0.348394	3.41788e-79	7.81259e-75
	DDX5	Matched_Unreactive-enriched	0.958	0.907	0.346026	3.29323e-144	7.52767e-140
	JUND	Matched_Unreactive-enriched	0.748	0.568	0.343093	6.60239e-101	1.50918e-96
	RASSF1	Matched_Unreactive-enriched	0.448	0.34	0.341322	2.60205e-64	5.94776e-60
	C1orf21	Matched_Unreactive-enriched	0.319	0.206	0.339917	1.29329e-73	2.95621e-69
	BHLHE40	Matched_Unreactive-enriched	0.286	0.184	0.339464	6.46912e-67	1.47871e-62
	KLRK1	Matched_Unreactive-enriched	0.666	0.556	0.338279	6.82719e-74	1.56056e-69
	MYO1F	Matched_Unreactive-enriched	0.409	0.295	0.33761	3.0771e-67	7.03363e-63
	SUN2	Matched_Unreactive-enriched	0.671	0.551	0.333266	1.88232e-79	4.3026e-75
	CD8A	Matched_Unreactive-enriched	0.87	0.798	0.331992	1.71012e-93	3.909e-89
	SELPLG	Matched_Unreactive-enriched	0.567	0.457	0.331521	2.19028e-72	5.00653e-68
	RAP1B	Matched_Unreactive-enriched	0.744	0.673	0.331456	4.18569e-75	9.56764e-71
	SRRT	Matched_Unreactive-enriched	0.314	0.225	0.327803	1.68338e-53	3.84786e-49
	FAM117A	Matched_Unreactive-enriched	0.309	0.215	0.32637	2.42059e-59	5.53298e-55
	CD247	Matched_Unreactive-enriched	0.569	0.467	0.322966	2.16183e-64	4.94151e-60
	ITGB2	Matched_Unreactive-enriched	0.86	0.75	0.321878	1.88368e-92	4.30572e-88
	PLEK	Matched_Unreactive-enriched	0.568	0.428	0.319997	1.30918e-71	2.99252e-67
	RAP2A	Matched_Unreactive-enriched	0.174	0.094	0.316272	1.74849e-68	3.99671e-64
	S100A4	Matched_Unreactive-enriched	0.981	0.903	0.314486	5.74398e-138	1.31296e-133
	SRRM2	Matched_Unreactive-enriched	0.64	0.536	0.313967	9.40078e-66	2.14883e-61
	CEP78	Matched_Unreactive-enriched	0.256	0.167	0.31393	2.99265e-54	6.84059e-50
	CHST12	Matched_Unreactive-enriched	0.339	0.244	0.309714	7.47067e-53	1.70765e-48
	PLAAT4	Matched_Unreactive-enriched	0.742	0.628	0.308296	3.44421e-77	7.87278e-73
	MAZ	Matched_Unreactive-enriched	0.38	0.301	0.305122	6.46244e-44	1.47718e-39
	RESF1	Matched_Unreactive-enriched	0.546	0.443	0.304479	1.51626e-55	3.46587e-51
	TNFSF12	Matched_Unreactive-enriched	0.281	0.196	0.304152	4.52105e-51	1.03342e-46
	S1PR5	Matched_Unreactive-enriched	0.304	0.213	0.303945	1.55057e-49	3.54429e-45
	PRR5	Matched_Unreactive-enriched	0.274	0.197	0.302257	7.43689e-45	1.69993e-40
	HLA-C	Matched_Unreactive-enriched	0.999	0.996	0.302068	9.09868e-219	2.07978e-214
	DIP2A	Matched_Unreactive-enriched	0.253	0.17	0.299811	4.9348e-51	1.128e-46
	ARL6IP1	Matched_Unreactive-enriched	0.576	0.479	0.298315	2.50753e-60	5.73171e-56
	ADRB2	Matched_Unreactive-enriched	0.237	0.148	0.297794	7.3108e-57	1.6711e-52
	SPOCK2	Matched_Unreactive-enriched	0.575	0.483	0.297637	2.01674e-52	4.60985e-48
	ANXA1	Matched_Unreactive-enriched	0.819	0.683	0.297339	1.85386e-92	4.23755e-88
	YWHAQ	Matched_Unreactive-enriched	0.565	0.474	0.296902	6.15983e-53	1.40801e-48
	IL10RA	Matched_Unreactive-enriched	0.519	0.416	0.294281	6.17855e-57	1.41229e-52
	OASL	Matched_Unreactive-enriched	0.15	0.077	0.293449	3.87553e-64	8.85868e-60
	SPSB3	Matched_Unreactive-enriched	0.392	0.312	0.292999	3.67857e-45	8.40847e-41
	GNAS	Matched_Unreactive-enriched	0.749	0.615	0.292328	3.94021e-75	9.00652e-71
	PABPN1	Matched_Unreactive-enriched	0.479	0.381	0.290971	1.3797e-52	3.15373e-48
	GRK2	Matched_Unreactive-enriched	0.361	0.275	0.290943	1.27177e-46	2.90702e-42
	HLA-A	Matched_Unreactive-enriched	0.996	0.989	0.290008	5.50961e-174	1.25939e-169
	UBC	Matched_Unreactive-enriched	0.961	0.915	0.289714	2.40205e-122	5.49061e-118
	C5orf56	Matched_Unreactive-enriched	0.287	0.216	0.28922	1.19703e-37	2.73616e-33
	CD3G	Matched_Unreactive-enriched	0.786	0.712	0.288644	2.63569e-64	6.02466e-60
	CD8B	Matched_Unreactive-enriched	0.864	0.812	0.288628	1.4563e-64	3.3288e-60
	SH3BGRL3	Matched_Unreactive-enriched	0.988	0.974	0.288273	5.26781e-128	1.20412e-123
	IQGAP2	Matched_Unreactive-enriched	0.366	0.286	0.288104	2.27948e-40	5.21044e-36
	SEPTIN7	Matched_Unreactive-enriched	0.688	0.583	0.287012	4.06802e-64	9.29868e-60
	CAPNS1	Matched_Unreactive-enriched	0.424	0.336	0.283939	7.03983e-46	1.60916e-41
	KLF3	Matched_Unreactive-enriched	0.47	0.38	0.283609	8.26297e-47	1.88875e-42
	CDC25B	Matched_Unreactive-enriched	0.414	0.334	0.281618	6.51513e-40	1.48923e-35
	TRAPPC10	Matched_Unreactive-enriched	0.261	0.182	0.280943	1.33134e-45	3.04317e-41
	SYNE2	Matched_Unreactive-enriched	0.647	0.534	0.280547	1.12881e-63	2.58024e-59
	PTPN18	Matched_Unreactive-enriched	0.257	0.179	0.280381	4.70145e-43	1.07466e-38
	CD99	Matched_Unreactive-enriched	0.914	0.805	0.280158	4.20081e-95	9.60222e-91
	DSTN	Matched_Unreactive-enriched	0.449	0.356	0.276759	7.96405e-49	1.82042e-44
	CD226	Matched_Unreactive-enriched	0.159	0.084	0.274852	5.03591e-64	1.15111e-59
	BIN2	Matched_Unreactive-enriched	0.674	0.591	0.27394	5.07929e-55	1.16102e-50
	RALGDS	Matched_Unreactive-enriched	0.229	0.156	0.271939	1.05429e-42	2.40989e-38
	PTP4A2	Matched_Unreactive-enriched	0.754	0.64	0.271271	3.64855e-75	8.33986e-71
	GLUL	Matched_Unreactive-enriched	0.189	0.116	0.270432	5.30227e-48	1.21199e-43
	KIF19	Matched_Unreactive-enriched	0.087	0.025	0.269735	1.00644e-111	2.30052e-107
	RNPEPL1	Matched_Unreactive-enriched	0.386	0.306	0.269557	8.84473e-41	2.02173e-36
	PREX1	Matched_Unreactive-enriched	0.285	0.218	0.269365	2.28847e-33	5.23098e-29
	APLP2	Matched_Unreactive-enriched	0.178	0.108	0.268973	1.19755e-47	2.73735e-43
	TMEM8A	Matched_Unreactive-enriched	0.167	0.106	0.268307	1.18321e-39	2.70459e-35
	GBP5	Matched_Unreactive-enriched	0.351	0.265	0.266542	2.61787e-40	5.98392e-36
	CTSD	Matched_Unreactive-enriched	0.452	0.377	0.265753	1.04086e-37	2.3792e-33
	PKN1	Matched_Unreactive-enriched	0.359	0.289	0.265038	1.35466e-34	3.09648e-30
	TSC22D3	Matched_Unreactive-enriched	0.862	0.789	0.2641	7.71962e-64	1.76455e-59
	CYTH1	Matched_Unreactive-enriched	0.452	0.375	0.261831	4.441e-39	1.01512e-34
	LITAF	Matched_Unreactive-enriched	0.787	0.708	0.261232	6.74057e-60	1.54076e-55
	PIP4K2A	Matched_Unreactive-enriched	0.421	0.332	0.261046	8.68647e-44	1.98555e-39
	LINC02384	Matched_Unreactive-enriched	0.122	0.052	0.260926	8.63215e-76	1.97314e-71
	PPDPF	Matched_Unreactive-enriched	0.92	0.874	0.260571	7.40192e-74	1.69193e-69
	SYTL2	Matched_Unreactive-enriched	0.199	0.13	0.260352	7.76902e-41	1.77584e-36
	LY6E	Matched_Unreactive-enriched	0.739	0.661	0.259269	4.52753e-51	1.0349e-46
	CCL5	Matched_Unreactive-enriched	0.995	0.815	0.256828	6.59012e-80	1.50637e-75
	ORAI1	Matched_Unreactive-enriched	0.388	0.303	0.25663	9.56842e-43	2.18715e-38
	RAPGEF1	Matched_Unreactive-enriched	0.183	0.117	0.255124	3.15273e-41	7.20651e-37
	MKNK2	Matched_Unreactive-enriched	0.274	0.208	0.254203	4.5703e-33	1.04468e-28
	ZAP70	Matched_Unreactive-enriched	0.559	0.484	0.253223	2.92442e-41	6.68464e-37
	PPP2R5C	Matched_Unreactive-enriched	0.588	0.492	0.253037	1.81214e-49	4.14219e-45
	AC092821.3	Matched_Unreactive-enriched	0.103	0.061	0.25301	4.98632e-28	1.13977e-23
	KLRB1	Matched_Unreactive-enriched	0.333	0.233	0.252359	1.63435e-45	3.73579e-41
	UBE2F	Matched_Unreactive-enriched	0.25	0.18	0.252198	3.06123e-36	6.99736e-32
	HNRNPUL2	Matched_Unreactive-enriched	0.268	0.199	0.252015	9.58153e-35	2.19015e-30
	SYNE1	Matched_Unreactive-enriched	0.477	0.379	0.251173	3.36601e-47	7.69402e-43
	HLA-E	Matched_Unreactive-enriched	0.979	0.953	0.250872	1.17051e-113	2.67556e-109
	BATF	Matched_Unreactive-enriched	0.234	0.166	0.250664	1.22624e-35	2.80295e-31
	GZMA	Not enriched	0.919	0.617	0.739649	0	0
	CMC1	Not enriched	0.587	0.365	0.696015	0	0
	KLRD1	Not enriched	0.556	0.372	0.633769	3.75022e-277	8.57225e-273
	CCL4	Not enriched	0.552	0.324	0.617042	0	0
	NKG7	Not enriched	0.982	0.711	0.590651	0	0
	CD81	Not enriched	0.667	0.464	0.587891	0	0
	GZMH	Not enriched	0.794	0.485	0.574767	0	0
	PLEK	Not enriched	0.59	0.368	0.533907	0	0
	EFHD2	Not enriched	0.657	0.435	0.52309	0	0
	HLA-DRB1	Not enriched	0.502	0.312	0.519451	1.80196e-287	4.11891e-283
	DUSP2	Not enriched	0.678	0.519	0.513168	2.80745e-253	6.41726e-249
	KLRG1	Not enriched	0.567	0.378	0.496537	9.17088e-275	2.09628e-270
	CTSC	Not enriched	0.616	0.433	0.491868	3.14588e-292	7.19086e-288
	LCP1	Not enriched	0.783	0.664	0.483753	1.45426e-289	3.32414e-285
	ARL4C	Not enriched	0.772	0.615	0.476293	0	0
	CD74	Not enriched	0.848	0.783	0.469723	1.4043e-225	3.20995e-221
	CST7	Not enriched	0.928	0.67	0.463532	0	0
	ABHD17A	Not enriched	0.624	0.454	0.455738	2.33698e-270	5.34186e-266
	C12orf75	Not enriched	0.596	0.425	0.452815	5.67013e-228	1.29608e-223
	SRGN	Not enriched	0.843	0.682	0.446504	0	0
	PRF1	Not enriched	0.707	0.482	0.443889	0	0
	HLA-DPA1	Not enriched	0.637	0.456	0.442753	8.71731e-271	1.9926e-266
	HLA-DPB1	Not enriched	0.671	0.503	0.442367	9.3847e-266	2.14515e-261
	TGFB1	Not enriched	0.724	0.582	0.44214	1.24796e-272	2.85259e-268
	CCL5	Not enriched	0.987	0.758	0.440737	0	0
	PTPRC	Not enriched	0.965	0.911	0.427987	0	0
	SPON2	Not enriched	0.359	0.237	0.425811	5.70881e-141	1.30492e-136
	CLIC1	Not enriched	0.82	0.68	0.418247	1.00669e-307	2.3011e-303
	SYNE1	Not enriched	0.483	0.342	0.413677	4.88608e-177	1.11686e-172
	PTP4A2	Not enriched	0.733	0.611	0.400654	1.46927e-212	3.35845e-208
	GNG2	Not enriched	0.496	0.368	0.397834	2.00137e-153	4.57473e-149
	ACTB	Not enriched	0.999	0.998	0.395349	0	0
	AHNAK	Not enriched	0.716	0.554	0.392538	8.21328e-218	1.87739e-213
	KLRB1	Not enriched	0.285	0.223	0.391977	1.53278e-44	3.50363e-40
	CX3CR1	Not enriched	0.317	0.207	0.389999	4.82239e-122	1.1023e-117
	ZEB2	Not enriched	0.422	0.272	0.389855	4.76589e-176	1.08939e-171
	FGFBP2	Not enriched	0.569	0.368	0.388261	3.02914e-233	6.924e-229
	TGFBR3	Not enriched	0.336	0.219	0.384626	1.43834e-135	3.28776e-131
	APOBEC3G	Not enriched	0.436	0.301	0.38339	3.76298e-162	8.60143e-158
	SAMD3	Not enriched	0.462	0.329	0.377857	1.51526e-144	3.46357e-140
	ANXA2	Not enriched	0.523	0.368	0.376117	1.90823e-185	4.36184e-181
	TRGV10	Not enriched	0.168	0.115	0.372597	4.19102e-53	9.57984e-49
	GNAI2	Not enriched	0.66	0.533	0.371254	9.91881e-190	2.26724e-185
	MATK	Not enriched	0.473	0.33	0.369122	2.46072e-171	5.6247e-167
	AOAH	Not enriched	0.336	0.224	0.367479	3.75597e-123	8.5854e-119
	ITGB2	Not enriched	0.837	0.725	0.364864	7.67504e-253	1.75436e-248
	SPN	Not enriched	0.425	0.314	0.363879	7.85994e-121	1.79663e-116
	GZMM	Not enriched	0.787	0.693	0.363471	1.16246e-226	2.65715e-222
	FLNA	Not enriched	0.672	0.546	0.362611	5.30247e-179	1.21204e-174
	CAP1	Not enriched	0.632	0.547	0.355174	2.42413e-114	5.54108e-110
	PPP2R5C	Not enriched	0.584	0.462	0.354378	1.13016e-138	2.58333e-134
	S100A4	Not enriched	0.948	0.893	0.353749	1.73161e-287	3.95812e-283
	SLC9A3R1	Not enriched	0.681	0.551	0.353552	8.55553e-183	1.95562e-178
	TLN1	Not enriched	0.504	0.392	0.34913	1.54156e-125	3.52371e-121
	GZMK	Not enriched	0.437	0.322	0.349051	1.4339e-101	3.27761e-97
	MSN	Not enriched	0.612	0.515	0.348781	3.128e-123	7.14999e-119
	KLF6	Not enriched	0.708	0.598	0.33959	5.09324e-142	1.16421e-137
	MTRNR2L8	Not enriched	0.218	0.182	0.339577	6.32619e-20	1.44604e-15
	CD99	Not enriched	0.877	0.787	0.339519	3.05966e-266	6.99377e-262
	HLA-DRA	Not enriched	0.18	0.102	0.336676	6.50069e-104	1.48593e-99
	PFN1	Not enriched	0.986	0.986	0.334411	0	0
	FCRL6	Not enriched	0.381	0.246	0.333832	3.32359e-146	7.59706e-142
	ACTR3	Not enriched	0.573	0.508	0.333377	2.08957e-71	4.77634e-67
	GNLY	Not enriched	0.701	0.467	0.332779	1.65196e-252	3.77604e-248
	CYBA	Not enriched	0.921	0.883	0.331842	1.06667e-298	2.4382e-294
	SSBP4	Not enriched	0.489	0.376	0.330098	1.03105e-125	2.35677e-121
	FYN	Not enriched	0.624	0.509	0.329692	1.92483e-138	4.39977e-134
	CD2	Not enriched	0.674	0.582	0.329123	2.71013e-122	6.19481e-118
	HIST1H1E	Not enriched	0.634	0.544	0.3291	3.86148e-97	8.82657e-93
	PYHIN1	Not enriched	0.361	0.255	0.328181	9.84357e-101	2.25004e-96
	SH2D1A	Not enriched	0.312	0.217	0.327376	2.17459e-98	4.97068e-94
	SYNE2	Not enriched	0.618	0.51	0.324969	1.50358e-120	3.43689e-116
	EOMES	Not enriched	0.218	0.128	0.324294	1.18692e-114	2.71306e-110
	ADGRE5	Not enriched	0.461	0.369	0.321499	7.97821e-94	1.82366e-89
	CLEC2B	Not enriched	0.615	0.521	0.32137	2.40553e-108	5.49855e-104
	CYTOR	Not enriched	0.356	0.233	0.319108	1.45359e-133	3.32261e-129
	IQGAP1	Not enriched	0.445	0.35	0.318674	5.84339e-90	1.33568e-85
	HSPA5	Not enriched	0.587	0.502	0.317344	9.7499e-100	2.22863e-95
	ZBTB38	Not enriched	0.36	0.278	0.316113	4e-70	9.1432e-66
	YWHAZ	Not enriched	0.859	0.803	0.315617	1.00034e-168	2.28657e-164
	ARF6	Not enriched	0.544	0.457	0.315553	5.40242e-92	1.23488e-87
	EMP3	Not enriched	0.862	0.799	0.315279	1.00536e-203	2.29806e-199
	HLA-A	Not enriched	0.993	0.988	0.314293	0	0
	CALM1	Not enriched	0.956	0.94	0.313778	0	0
	GZMB	Not enriched	0.549	0.382	0.31362	1.36031e-158	3.1094e-154
	MAP3K8	Not enriched	0.236	0.144	0.312955	2.11443e-113	4.83317e-109
	ACTR2	Not enriched	0.487	0.407	0.309196	1.77091e-75	4.04795e-71
	CD8A	Not enriched	0.842	0.788	0.308502	3.90041e-176	8.91555e-172
	HSP90AA1	Not enriched	0.827	0.778	0.30787	8.98352e-134	2.05345e-129
	HLA-DRB5	Not enriched	0.253	0.161	0.307018	1.29808e-101	2.96714e-97
	CAPNS1	Not enriched	0.415	0.31	0.304579	2.05707e-108	4.70206e-104
	APMAP	Not enriched	0.499	0.372	0.301377	3.83911e-125	8.77543e-121
	PPP1R18	Not enriched	0.514	0.414	0.301218	2.11273e-96	4.82928e-92
	MYO1F	Not enriched	0.385	0.268	0.301021	1.19451e-120	2.73041e-116
	DOK2	Not enriched	0.415	0.302	0.300803	4.12473e-108	9.4283e-104
	ARPC5L	Not enriched	0.507	0.392	0.299183	4.2325e-117	9.67466e-113
	ANXA1	Not enriched	0.777	0.658	0.298844	1.42887e-145	3.26612e-141
	MYBL1	Not enriched	0.311	0.217	0.298005	9.85032e-92	2.25159e-87
	SH3BGRL3	Not enriched	0.976	0.976	0.296548	0	0
	YWHAQ	Not enriched	0.543	0.454	0.296223	5.70919e-89	1.30501e-84
	GPR65	Not enriched	0.293	0.223	0.29566	2.29998e-57	5.2573e-53
	IL2RG	Not enriched	0.762	0.706	0.295225	6.68201e-129	1.52737e-124
	JUND	Not enriched	0.678	0.543	0.293839	9.05499e-129	2.06979e-124
	HERPUD1	Not enriched	0.425	0.34	0.2936	2.91656e-77	6.66668e-73
	MACF1	Not enriched	0.386	0.307	0.292836	3.20593e-67	7.32812e-63
	PIP4K2A	Not enriched	0.403	0.31	0.291534	5.80759e-89	1.3275e-84
	RAP1B	Not enriched	0.723	0.66	0.291375	3.28534e-94	7.50962e-90
	ABI3	Not enriched	0.284	0.188	0.290783	1.36007e-103	3.10884e-99
	ARPC2	Not enriched	0.884	0.839	0.290771	2.06174e-174	4.71272e-170
	CAPZA1	Not enriched	0.348	0.281	0.290394	2.32996e-56	5.32583e-52
	PPP1CA	Not enriched	0.715	0.63	0.289521	1.28457e-133	2.93626e-129
	CALR	Not enriched	0.641	0.576	0.288926	5.13225e-81	1.17313e-76
	GSTP1	Not enriched	0.657	0.56	0.288891	3.58745e-122	8.20019e-118
	CD53	Not enriched	0.601	0.529	0.28879	8.57699e-77	1.96053e-72
	LITAF	Not enriched	0.777	0.686	0.286878	6.635e-132	1.51663e-127
	CDC42	Not enriched	0.696	0.635	0.286274	4.005e-90	9.15464e-86
	PDIA3	Not enriched	0.658	0.578	0.285438	1.26723e-101	2.89662e-97
	ACTN4	Not enriched	0.303	0.21	0.285191	3.76577e-91	8.60781e-87
	B2M	Not enriched	1	1	0.282546	0	0
	HCST	Not enriched	0.937	0.919	0.282493	5.1724e-240	1.18231e-235
	ORAI1	Not enriched	0.373	0.282	0.28234	1.18469e-88	2.70797e-84
	SYTL3	Not enriched	0.319	0.232	0.280903	7.49519e-79	1.71325e-74
	MYO1G	Not enriched	0.451	0.356	0.280416	1.85034e-85	4.22951e-81
	IRF1	Not enriched	0.489	0.417	0.28023	5.38351e-54	1.23056e-49
	ID2	Not enriched	0.432	0.361	0.279178	7.88462e-55	1.80227e-50
	IL32	Not enriched	0.969	0.96	0.278679	1.01702e-271	2.32471e-267
	THEMIS	Not enriched	0.341	0.272	0.27777	1.64924e-55	3.76983e-51
	TPM4	Not enriched	0.214	0.153	0.277306	4.39166e-57	1.00385e-52
	IQGAP2	Not enriched	0.349	0.268	0.276893	8.31344e-70	1.90029e-65
	ACTG1	Not enriched	0.946	0.942	0.27528	2.83126e-113	6.47169e-109
	HLA-B	Not enriched	0.999	0.999	0.275022	0	0
	ITGAL	Not enriched	0.361	0.278	0.274955	3.06686e-72	7.01022e-68
	UBC	Not enriched	0.928	0.917	0.273933	1.51225e-218	3.4567e-214
	AGTRAP	Not enriched	0.267	0.184	0.273643	8.66532e-85	1.98072e-80
	CFL1	Not enriched	0.962	0.958	0.2736	2.05137e-243	4.68902e-239
	ALOX5AP	Not enriched	0.364	0.308	0.273523	9.37514e-41	2.14297e-36
	SLAMF7	Not enriched	0.212	0.134	0.272742	2.18242e-84	4.98858e-80
	ARPC1B	Not enriched	0.738	0.696	0.271214	6.47524e-97	1.48011e-92
	ARAP2	Not enriched	0.282	0.208	0.270816	1.45477e-65	3.32531e-61
	MYL12B	Not enriched	0.877	0.829	0.270725	8.80462e-157	2.01256e-152
	RHOC	Not enriched	0.335	0.23	0.268146	4.68687e-103	1.07133e-98
	PIK3R1	Not enriched	0.494	0.431	0.266593	1.77324e-51	4.05327e-47
	MXRA7	Not enriched	0.206	0.124	0.266466	3.57781e-100	8.17816e-96
	PTPN22	Not enriched	0.25	0.188	0.26544	7.98014e-49	1.8241e-44
	PABPN1	Not enriched	0.448	0.363	0.265374	5.02493e-74	1.1486e-69
	TPST2	Not enriched	0.447	0.354	0.264943	2.69673e-77	6.16419e-73
	MAPK1	Not enriched	0.27	0.205	0.264783	1.01908e-51	2.32942e-47
	WDR1	Not enriched	0.514	0.443	0.261895	5.87282e-62	1.34241e-57
	MT-ND6	Not enriched	0.559	0.511	0.261618	7.0744e-33	1.61707e-28
	GLIPR1	Not enriched	0.322	0.253	0.261444	2.23376e-52	5.10592e-48
	ATP2B4	Not enriched	0.268	0.198	0.259433	2.90873e-57	6.64877e-53
	UTRN	Not enriched	0.363	0.296	0.259174	3.4487e-50	7.88304e-46
	RNF213	Not enriched	0.599	0.526	0.258829	7.59804e-72	1.73676e-67
	PTGDR	Not enriched	0.283	0.194	0.258801	2.18994e-83	5.00576e-79
	CD63	Not enriched	0.462	0.364	0.25868	1.79822e-84	4.11037e-80
	MYL6	Not enriched	0.931	0.908	0.257816	4.44938e-202	1.01704e-197
	TBX21	Not enriched	0.346	0.241	0.257364	3.30725e-95	7.55971e-91
	RASAL3	Not enriched	0.453	0.372	0.256047	9.7228e-71	2.22244e-66
	ANXA6	Not enriched	0.621	0.544	0.25429	1.57005e-81	3.58883e-77
	ADGRG1	Not enriched	0.342	0.243	0.252443	5.75922e-83	1.31644e-78
	GNAS	Not enriched	0.686	0.601	0.252323	7.56534e-92	1.72928e-87
	EZR	Not enriched	0.514	0.442	0.252288	4.73671e-62	1.08272e-57
	TAF10	Not enriched	0.497	0.407	0.251914	3.68431e-80	8.4216e-76
	IFNG	Not enriched	0.109	0.051	0.250809	9.71726e-97	2.22117e-92
	RAB29	Not enriched	0.289	0.225	0.250658	8.36431e-48	1.91191e-43
	LTB	Unmatched	0.663	0.299	1.57377	0	0
	CCR7	Unmatched	0.319	0.034	1.18682	0	0
	LINC02446	Unmatched	0.361	0.123	1.11827	0	0
	NOSIP	Unmatched	0.535	0.297	1.04283	0	0
	LEF1	Unmatched	0.349	0.091	0.991297	0	0
	TCF7	Unmatched	0.493	0.237	0.932476	0	0
	MAL	Unmatched	0.252	0.016	0.913179	0	0
	LDHB	Unmatched	0.788	0.621	0.869001	0	0
	SELL	Unmatched	0.461	0.21	0.853792	0	0
	IL7R	Unmatched	0.668	0.378	0.780669	0	0
	NELL2	Unmatched	0.311	0.081	0.767472	0	0
	RCAN3	Unmatched	0.264	0.048	0.725376	0	0
	RPS13	Unmatched	0.998	0.993	0.724103	0	0
	MYC	Unmatched	0.223	0.042	0.723134	0	0
	RPL22	Unmatched	0.982	0.955	0.711445	0	0
	RPLP1	Unmatched	1	0.998	0.682711	0	0
	RPS5	Unmatched	0.991	0.973	0.659835	0	0
	AIF1	Unmatched	0.196	0.026	0.658907	0	0
	RPL32	Unmatched	1	0.997	0.657989	0	0
	EEF1B2	Unmatched	0.971	0.939	0.655809	0	0
	SNHG29	Unmatched	0.67	0.609	0.655785	1.38885e-302	3.17463e-298
	PCBP2	Unmatched	0.77	0.593	0.650421	0	0
	SNHG8	Unmatched	0.587	0.393	0.620432	0	0
	RPS28	Unmatched	0.999	0.998	0.618946	0	0
	RPS12	Unmatched	1	1	0.618072	0	0
	RPS8	Unmatched	0.999	0.996	0.615152	0	0
	PRKCQ-AS1	Unmatched	0.311	0.154	0.608291	0	0
	RPL5	Unmatched	0.995	0.981	0.596676	0	0
	LEPROTL1	Unmatched	0.597	0.407	0.594542	0	0
	GAS5	Unmatched	0.554	0.409	0.588872	8.94499e-299	2.04465e-294
	CD27	Unmatched	0.476	0.251	0.586757	0	0
	PIK3IP1	Unmatched	0.373	0.192	0.58392	0	0
	RPS21	Unmatched	0.998	0.991	0.583148	0	0
	RPL39	Unmatched	1	1	0.583087	0	0
	PASK	Unmatched	0.199	0.045	0.581616	0	0
	RPL36	Unmatched	0.996	0.982	0.580033	0	0
	RPLP0	Unmatched	0.992	0.977	0.571955	0	0
	CAMK4	Unmatched	0.353	0.158	0.56695	0	0
	RGS10	Unmatched	0.529	0.346	0.564582	0	0
	FOS	Unmatched	0.497	0.446	0.562846	5.11014e-70	1.16808e-65
	RPL11	Unmatched	0.999	0.996	0.555212	0	0
	ARMH1	Unmatched	0.173	0.024	0.550384	0	0
	FLT3LG	Unmatched	0.457	0.28	0.550219	0	0
	RPL12	Unmatched	0.997	0.989	0.547873	0	0
	RPL37	Unmatched	0.998	0.994	0.544367	0	0
	RPL9	Unmatched	0.992	0.986	0.536825	0	0
	RPL13	Unmatched	1	0.997	0.535324	0	0
	RPS23	Unmatched	0.999	0.997	0.533998	0	0
	SARAF	Unmatched	0.909	0.852	0.530682	0	0
	RPL34	Unmatched	1	1	0.527998	0	0
	RPL30	Unmatched	1	0.999	0.507623	0	0
	ACTN1	Unmatched	0.156	0.018	0.502484	0	0
	RPL18	Unmatched	0.996	0.988	0.495886	0	0
	NPM1	Unmatched	0.902	0.846	0.492627	0	0
	TPT1	Unmatched	0.999	0.998	0.49044	0	0
	AQP3	Unmatched	0.201	0.062	0.487113	0	0
	SPINT2	Unmatched	0.163	0.019	0.481659	0	0
	RPL35A	Unmatched	0.998	0.993	0.479746	0	0
	RPL10A	Unmatched	0.98	0.965	0.475044	0	0
	RPS25	Unmatched	0.997	0.989	0.468085	0	0
	RPS3A	Unmatched	1	0.999	0.464639	0	0
	RPL19	Unmatched	0.999	0.995	0.464114	0	0
	RPS6	Unmatched	0.998	0.994	0.455333	0	0
	LDLRAP1	Unmatched	0.25	0.105	0.45378	3.35957e-306	7.67931e-302
	TRABD2A	Unmatched	0.174	0.04	0.452037	0	0
	RPL36A	Unmatched	0.965	0.933	0.45096	0	0
	SERINC5	Unmatched	0.161	0.029	0.44626	0	0
	RPL18A	Unmatched	0.999	0.992	0.445473	0	0
	EEF1G	Unmatched	0.767	0.802	0.445387	2.03239e-220	4.64564e-216
	RPL8	Unmatched	0.992	0.975	0.438053	0	0
	EIF3E	Unmatched	0.656	0.517	0.437877	3.9468e-283	9.0216e-279
	RPL4	Unmatched	0.937	0.901	0.435169	0	0
	RPL10	Unmatched	1	0.999	0.432884	0	0
	RPS29	Unmatched	0.989	0.965	0.431218	0	0
	PABPC1	Unmatched	0.875	0.854	0.428764	1.62921e-297	3.72406e-293
	AES	Unmatched	0.141	0.067	0.423082	4.75792e-125	1.08757e-120
	MTRNR2L12	Unmatched	0.933	0.957	0.422313	6.42352e-60	1.46829e-55
	S100B	Unmatched	0.089	0.026	0.420471	3.08315e-162	7.04747e-158
	RPL38	Unmatched	0.946	0.897	0.415205	0	0
	RPLP2	Unmatched	0.995	0.987	0.414017	0	0
	OXNAD1	Unmatched	0.316	0.174	0.41187	3.7491e-234	8.56968e-230
	MT-ND3	Unmatched	0.996	0.991	0.411535	0	0
	EEF1A1	Unmatched	1	1	0.40945	0	0
	RPS16	Unmatched	0.975	0.965	0.405964	0	0
	RPS15A	Unmatched	1	0.999	0.403147	0	0
	TMEM123	Unmatched	0.415	0.274	0.399638	6.62086e-201	1.5134e-196
	SH3YL1	Unmatched	0.158	0.047	0.399457	2.26201e-293	5.17049e-289
	RPSA	Unmatched	0.987	0.977	0.396484	0	0
	SMDT1	Unmatched	0.557	0.418	0.393544	2.83804e-193	6.4872e-189
	ABLIM1	Unmatched	0.283	0.153	0.392678	2.37133e-208	5.42039e-204
	RPL24	Unmatched	0.987	0.968	0.385948	0	0
	RPS4X	Unmatched	0.999	0.993	0.383229	0	0
	RPS27	Unmatched	1	1	0.378132	0	0
	ZFAS1	Unmatched	0.637	0.506	0.373823	4.17262e-204	9.53778e-200
	SOCS3	Unmatched	0.154	0.057	0.372477	6.56805e-216	1.50132e-211
	FOXP1	Unmatched	0.437	0.306	0.370791	5.67101e-168	1.29628e-163
	RPL28	Unmatched	0.999	0.997	0.367334	0	0
	CD7	Unmatched	0.706	0.605	0.367127	2.56799e-175	5.86992e-171
	ST13	Unmatched	0.51	0.379	0.363553	8.50771e-167	1.94469e-162
	RPS9	Unmatched	0.987	0.973	0.363538	0	0
	RPS27A	Unmatched	1	1	0.363133	0	0
	PIM2	Unmatched	0.241	0.123	0.361204	1.7295e-196	3.9533e-192
	RACK1	Unmatched	0.984	0.969	0.360487	0	0
	NACA	Unmatched	0.99	0.976	0.360361	0	0
	RPL29	Unmatched	0.996	0.985	0.35913	0	0
	HSPB1	Unmatched	0.409	0.286	0.358137	7.1019e-145	1.62335e-140
	RPS15	Unmatched	0.998	0.99	0.357151	0	0
	RPL41	Unmatched	1	1	0.356797	0	0
	PPA1	Unmatched	0.348	0.218	0.352848	2.21747e-175	5.06869e-171
	CD55	Unmatched	0.28	0.163	0.351854	3.29965e-166	7.54235e-162
	COX7C	Unmatched	0.913	0.847	0.350268	0	0
	SATB1	Unmatched	0.198	0.084	0.350199	5.3211e-227	1.2163e-222
	BEX3	Unmatched	0.116	0.019	0.347897	0	0
	TXK	Unmatched	0.15	0.042	0.345531	1.92242e-288	4.39428e-284
	DGKA	Unmatched	0.241	0.122	0.34426	3.80082e-196	8.68791e-192
	RPS14	Unmatched	1	0.998	0.344248	0	0
	HINT1	Unmatched	0.899	0.834	0.342742	1.12497e-287	2.57145e-283
	RGCC	Unmatched	0.17	0.077	0.338602	5.19527e-168	1.18754e-163
	NDFIP1	Unmatched	0.491	0.379	0.333127	4.77118e-127	1.0906e-122
	RPS18	Unmatched	0.999	0.997	0.332684	0	0
	ITM2C	Unmatched	0.121	0.029	0.330498	6.18899e-267	1.41468e-262
	RPL14	Unmatched	0.998	0.991	0.328451	0	0
	NCF1	Unmatched	0.157	0.062	0.326999	7.9269e-199	1.81193e-194
	PLP2	Unmatched	0.354	0.246	0.326257	7.57913e-121	1.73244e-116
	MCUB	Unmatched	0.457	0.326	0.320739	1.45835e-145	3.33349e-141
	RPL6	Unmatched	0.997	0.99	0.319928	0	0
	EIF3H	Unmatched	0.665	0.56	0.313164	3.37498e-158	7.71453e-154
	BACH2	Unmatched	0.11	0.016	0.313104	0	0
	RARRES3	Unmatched	0.14	0.078	0.312155	1.02979e-81	2.3539e-77
	MAML2	Unmatched	0.187	0.086	0.309688	5.98395e-180	1.36781e-175
	ALKBH7	Unmatched	0.391	0.278	0.307765	1.32204e-117	3.02192e-113
	MGAT4A	Unmatched	0.475	0.365	0.305242	1.45908e-116	3.33516e-112
	TMEM14C	Unmatched	0.145	0.051	0.304612	4.34346e-215	9.92827e-211
	RPL7	Unmatched	0.892	0.84	0.303425	0	0
	SNX9	Unmatched	0.116	0.029	0.302575	1.02034e-248	2.33229e-244
	RPL15	Unmatched	0.988	0.979	0.302449	0	0
	A1BG	Unmatched	0.191	0.094	0.301701	6.35936e-161	1.45362e-156
	PCSK1N	Unmatched	0.105	0.025	0.294955	1.13922e-233	2.60403e-229
	FXYD2	Unmatched	0.074	0.016	0.293069	3.29151e-177	7.52373e-173
	RPL37A	Unmatched	0.969	0.959	0.29254	2.43825e-301	5.57335e-297
	SNHG5	Unmatched	0.368	0.278	0.291527	1.05757e-83	2.41739e-79
	PCED1B	Unmatched	0.231	0.137	0.288243	1.18862e-122	2.71695e-118
	TMIGD2	Unmatched	0.09	0.006	0.287989	0	0
	COTL1	Unmatched	0.483	0.346	0.285645	3.85156e-126	8.8039e-122
	SERP1	Unmatched	0.612	0.513	0.284853	4.53398e-117	1.03638e-112
	COMMD6	Unmatched	0.883	0.814	0.28338	6.17886e-164	1.41236e-159
	FAU	Unmatched	0.997	0.989	0.280691	0	0
	NFKBIZ	Unmatched	0.2	0.109	0.279918	5.58282e-133	1.27612e-128
	RIC3	Unmatched	0.129	0.046	0.27888	3.69616e-186	8.44869e-182
	BTF3	Unmatched	0.953	0.93	0.276521	9.66319e-265	2.20881e-260
	RSL1D1	Unmatched	0.45	0.344	0.273751	2.33512e-103	5.33762e-99
	RPL21	Unmatched	0.997	0.996	0.270866	0	0
	RPL31	Unmatched	0.927	0.894	0.269624	7.12379e-220	1.62836e-215
	PDE3B	Unmatched	0.269	0.17	0.268375	8.86782e-115	2.02701e-110
	PIM1	Unmatched	0.343	0.254	0.268174	1.40897e-80	3.22062e-76
	RPS24	Unmatched	1	0.997	0.267525	0	0
	MT-ND4L	Unmatched	0.971	0.971	0.267017	1.31296e-140	3.00117e-136
	BEX2	Unmatched	0.167	0.082	0.266923	1.59584e-139	3.64777e-135
	CHRM3-AS2	Unmatched	0.086	0.012	0.264453	1.81976e-260	4.15962e-256
	C12orf57	Unmatched	0.817	0.746	0.263443	1.25579e-129	2.87048e-125
	AL138963.3	Unmatched	0.059	0.031	0.259063	4.41872e-42	1.01003e-37
	TOMM7	Unmatched	0.923	0.875	0.258612	6.03731e-188	1.38001e-183
	EIF3L	Unmatched	0.619	0.529	0.257574	3.1664e-103	7.23775e-99
	RPL27	Unmatched	0.965	0.942	0.257371	1.8942e-247	4.32977e-243
	LSM5	Unmatched	0.309	0.217	0.256585	4.37425e-90	9.99866e-86
	LRRN3	Unmatched	0.067	0.001	0.254758	8.75253e-302	2.00065e-297
	SIRPG	Unmatched	0.172	0.088	0.253072	2.03491e-129	4.6514e-125
	NSA2	Unmatched	0.533	0.435	0.251986	5.15176e-89	1.17759e-84
	GPX4	Unmatched	0.557	0.461	0.251254	1.47389e-84	3.36901e-80
	RPS2	Unmatched	0.99	0.987	0.250675	0	0
	EPHX2	Unmatched	0.095	0.021	0.25059	5.70153e-216	1.30325e-211

## Sheet: Table S7 - Pseudotime pattern
Table S7: Differentially associated genes along pseudotime for Lineage 1 and Lineage 2 (corresponding to Figure 3B)
	Gene	Wald Statistic (Lineage 1 vs. Lineage 2)	Degrees of freedoming (Lineage 1 vs. Lineage 2)	p-value (Lineage 1 vs. Lineage 2)	Median fold-change
	ZNF683	3184.78	9	0	1.63235
	CMC1	3171.23	9	0	0.326622
	FGFBP2	2785.47	9	0	0.77185
	ITGB1	2401.48	9	0	0.360312
	GZMK	2239.38	9	0	0.537437
	ACTB	2112.6	9	0	0.267511
	KLRC2	1937.66	9	0	0.861217
	PRSS23	1590.92	9	0	1.01409
	SPON2	1489.38	9	0	0.867368
	KLRF1	1149.36	9	0	0.61087
	GZMH	1125.68	9	0	0.404162
	CD74	1066.36	9	0	0.365437
	ACTG1	1033.13	9	0	0.32353
	KLRC3	990.502	9	0	1.16591
	GZMB	884.84	9	0	0.268958
	CD52	878.902	9	0	0.252872
	ASCL2	845.405	9	0	0.75317
	XCL2	803.595	9	0	0.945216
	KLRG1	714.402	9	0	0.276971
	PROK2	672.437	9	0	0.839456
	CD160	634.921	9	0	1.3391
	THEMIS	632.855	9	0	0.33781
	TCF7	631.113	9	0	0.749338
	ADGRG1	622.956	9	0	0.663885
	IKZF2	622.9	9	0	1.38558
	PLAC8	602.166	9	0	0.563855
	FCGR3A	561.778	9	0	0.885558
	TRGV8	545.242	9	0	1.18013
	TIGIT	497.587	9	0	0.499509
	TYROBP	493.297	9	0	0.666803
	TRGV2	477.953	9	0	0.825266
	FCRL3	470.312	9	0	0.714983
	KIR2DL3	447.645	9	0	0.608073
	CORO1A	406.83	9	0	0.281212
	LTB	397.465	9	0	0.766394
	CX3CR1	390.702	9	0	0.785549
	XCL1	378.652	9	0	0.573235
	CCL4L2	362.573	9	0	0.644048
	RHOC	362.527	9	0	0.367651
	MTRNR2L8	350.558	9	0	0.600217
	LYST	338.333	9	0	0.301619
	EOMES	330.495	9	0	0.522702
	NCR3	301.506	9	0	0.400275
	STK17A	295.982	9	0	0.272058
	KLRC4	294.291	9	0	0.307909
	CXXC5	293.685	9	0	0.341497
	TPM4	289.88	9	0	0.504424
	CD226	278.346	9	0	0.380699
	TNFAIP3	272.69	9	0	0.308803
	COTL1	269.221	9	0	0.422879
	CES1	254.106	9	0	1.5651
	CAP1	253.393	9	0	0.340558
	SEPT7	249.303	9	0	0.705343
	GNLY	245.787	9	0	0.272782
	LCP1	239.251	9	0	0.362207
	NFKBIA	235.329	9	0	0.373306
	CD300A	235.177	9	0	0.260174
	GZMM	235.044	9	0	0.268717
	DUSP1	230.995	9	0	0.33006
	ARPC5L	230.14	9	0	0.286653
	TTC38	229.561	9	0	0.92265
	TRDC	219.986	9	0	2.92011
	PHACTR2	218.884	9	0	0.394934
	RARRES3	215.445	9	0	0.505714
	CTSC	214.941	9	0	0.277852
	HLA-DRA	212.794	9	0	0.78596
	PDCD4	212.274	9	0	0.263279
	AOAH	209.02	9	0	0.360677
	MCUB	206.394	9	0	0.345621
	STMN3	199.901	9	0	0.419752
	CD6	196.658	9	0	0.379875
	SSBP3	196.207	9	0	0.438995
	KLRC1	195.68	9	0	0.487535
	SRRT	194.147	9	0	0.254844
	TRAT1	192.153	9	0	0.47663
	ANXA5	190.392	9	0	0.441438
	IL7R	188.594	9	0	0.680731
	ITM2A	182.819	9	0	0.388546
	OASL	182.549	9	0	0.353334
	HLA-DQA2	178.477	9	0	0.28829
	SELL	178.4	9	0	0.480458
	ZEB2	178.212	9	0	0.370391
	TBX21	176.011	9	0	0.362387
	XBP1	171.158	9	0	0.257959
	ZYX	170.265	9	0	0.278211
	IFITM3	169.383	9	0	0.396149
	PTGDR	167.078	9	0	0.300575
	CCL3	166.509	9	0	0.566881
	AKR1C3	163.866	9	0	0.830916
	PDE3B	150.601	9	0	0.261029
	HLA-DQB1	149.015	9	0	0.334846
	FCER1G	148.6	9	0	3.12131
	MTSS1	146.702	9	0	0.598309
	CRTAM	145.621	9	0	0.442592
	IFNGR1	144.809	9	0	0.301396
	SDF2L1	144.224	9	0	0.433189
	HLA-DQA1	143.848	9	0	1.17609
	GPR141	143.243	9	0	0.632513
	TC2N	143.045	9	0	0.28881
	LINC02384	142.51	9	0	0.763343
	WDR1	141.958	9	0	0.368372
	CISD3	141.704	9	0	0.313957
	SKAP2	141.442	9	0	0.471784
	SEC61G	140.918	9	0	0.316507
	AES	135.214	9	0	0.49434
	HLA-DMA	134.724	9	0	0.343042
	HSPA5	134.511	9	0	0.462194
	CDC25B	133.852	9	0	0.270795
	ALOX5AP	130.694	9	0	0.358677
	SPN	124.905	9	0	0.308573
	MXD4	122.739	9	0	0.324421
	AGTRAP	121.585	9	0	0.325198
	CD53	121.072	9	0	0.259763
	SEPT6	120.424	9	0	0.429994
	KIR3DL2	118.304	9	0	1.10146
	G6PD	117.992	9	0	0.385671
	YBX3	116.833	9	0	0.41749
	STMN1	116.202	9	0	0.329516
	LILRB1	115.381	9	0	0.385524
	ARID5B	114.034	9	0	0.352569
	NPDC1	113.815	9	0	0.698269
	BCL2	113.141	9	0	0.365751
	S100B	112.722	9	0	0.609926
	PECAM1	111.886	9	0	0.543161
	APOBEC3G	108.715	9	0	0.269328
	GNG2	108.268	9	0	0.344513
	MXRA7	107.616	9	0	0.285356
	TRGV9	106.904	9	0	1.38485
	GBP5	105.246	9	0	0.42821
	CYTOR	105.091	9	0	0.257614
	KIAA1551	102.563	9	0	0.640833
	ITGAM	100.921	9	0	0.509352
	AL138963.3	100.633	9	0	0.820041
	TGFBR3	100.129	9	0	0.280125
	SIT1	98.6075	9	0	0.31441
	ADGRE5	98.436	9	0	0.280121
	DBN1	96.9358	9	1.11022e-16	0.322834
	ARPC4	96.6972	9	1.11022e-16	0.318026
	DBI	94.2912	9	2.22045e-16	0.270173
	CD320	92.5113	9	5.55112e-16	0.399225
	LFNG	91.5801	9	7.77156e-16	0.266642
	CAMK4	90.675	9	1.22125e-15	0.56348
	C1orf162	90.575	9	1.22125e-15	0.394045
	HLA-DRB5	89.5122	9	1.9984e-15	0.381114
	PEPD	85.8049	9	1.12133e-14	0.364744
	GAS5	84.2593	9	2.29816e-14	0.272825
	PDE4D	84.0522	9	2.52021e-14	0.261256
	LAIR2	84.0032	9	2.57572e-14	1.06118
	PRR5	82.9707	9	4.14113e-14	0.299203
	INPP4B	81.5915	9	7.79377e-14	0.45367
	VPS26B	81.4732	9	8.23785e-14	0.348679
	PLEKHF1	80.611	9	1.22236e-13	0.411731
	BTG2	80.1259	9	1.52545e-13	0.271192
	ALDOA	79.3516	9	2.17382e-13	0.258203
	PITPNC1	78.3543	9	3.42837e-13	0.263983
	UBL3	78.3513	9	3.43281e-13	0.37054
	BANF1	75.311	9	1.3719e-12	0.259463
	RHOB	73.5704	9	3.02502e-12	0.519974
	SNHG7	73.4064	9	3.25873e-12	0.373472
	APLP2	72.7775	9	4.3342e-12	0.260663
	FCRL6	71.9674	9	6.25611e-12	0.397609
	MIR4435-2HG	70.7632	9	1.07867e-11	0.351754
	GLUL	70.5501	9	1.18769e-11	0.35805
	GADD45B	69.7068	9	1.73812e-11	0.253966
	TRGV4	69.1925	9	2.19208e-11	0.382218
	ANTKMT	67.5845	9	4.52237e-11	0.287588
	PMAIP1	67.3027	9	5.13338e-11	0.459805
	OSTF1	67.0982	9	5.62778e-11	0.258891
	ARHGDIA	66.5935	9	7.06e-11	0.376518
	MDFIC	66.422	9	7.62503e-11	0.312925
	ICAM2	65.8312	9	9.93993e-11	0.381039
	RAB8B	64.5978	9	1.72739e-10	0.568353
	CDK2AP2	63.7721	9	2.49906e-10	0.348057
	EPB41	62.7757	9	3.89931e-10	0.296905
	PDIA6	62.7482	9	3.94735e-10	0.354987
	AC092821.3	62.4904	9	4.42842e-10	0.66161
	CD244	59.8173	9	1.45385e-09	0.393519
	S1PR5	58.1906	9	2.98773e-09	0.374541
	EIF4E3	56.904	9	5.27199e-09	0.304478
	MRPL20	55.9042	9	8.18705e-09	0.252953
	TSPYL2	55.5747	9	9.46312e-09	0.328547
	CSK	55.5414	9	9.60273e-09	0.308961
	TIMP1	54.9468	9	1.24672e-08	0.286718
	KIAA2013	53.846	9	2.01947e-08	0.317777
	RGS19	52.9072	9	3.0437e-08	0.27976
	MANF	52.0882	9	4.34995e-08	0.524046
	IFNG	51.3673	9	5.95268e-08	0.610482
	CTDSP1	50.7922	9	7.64154e-08	0.327854
	PXN	50.6732	9	8.04663e-08	0.252949
	GLIPR2	50.3219	9	9.37054e-08	0.285612
	NCK2	50.1857	9	9.93986e-08	0.330813
	NAAA	49.6688	9	1.24327e-07	0.318575
	LAIR1	49.3	9	1.4581e-07	0.374235
	PLP2	48.7726	9	1.83097e-07	0.281973
	RASAL3	48.6227	9	1.95322e-07	0.258368
	LGR6	47.2586	9	3.51241e-07	0.648838
	CLIC3	47.0509	9	3.83992e-07	0.280197
	STARD3NL	46.9171	9	4.06669e-07	0.385765
	KIR3DL1	46.9141	9	4.07184e-07	0.674395
	PTPRJ	46.7178	9	4.42942e-07	0.282694
	LLGL2	46.0298	9	5.94588e-07	0.289422
	CASP1	45.5959	9	7.15651e-07	0.251065
	TRAPPC5	45.5006	9	7.45357e-07	0.252158
	NFKBIZ	45.1317	9	8.72331e-07	0.397189
	FAM53B	43.4764	9	1.76214e-06	0.315311
	RALGDS	42.7864	9	2.35913e-06	0.335707
	KIF22	42.2083	9	3.01058e-06	0.382829
	CORO1B	42.1251	9	3.11789e-06	0.366799
	PTMS	42.1231	9	3.12061e-06	0.267448
	ABLIM1	41.7788	9	3.60701e-06	0.323455
	IGLV2-14	41.009	9	4.98304e-06	0.416266
	MYO1G	40.8177	9	5.39898e-06	0.310894
	YARS	40.4027	9	6.42248e-06	0.288398
	CBX4	39.747	9	8.44386e-06	0.273688
	MAD2L2	39.2815	9	1.02488e-05	0.373493
	FOXP1	38.7849	9	1.25959e-05	0.322701
	TRIM8	37.9255	9	1.79764e-05	0.359266
	TRGV3	37.7589	9	1.92559e-05	0.322646
	MCTP2	37.6054	9	2.05143e-05	0.278276
	SASH3	37.1836	9	2.44049e-05	0.298465
	TMCO1	36.5218	9	3.20242e-05	0.261103
	H1FX	35.2915	9	5.29254e-05	0.259366
	SVIP	34.398	9	7.60523e-05	0.272452
	HNRNPLL	34.1018	9	8.57253e-05	0.277838
	POP4	33.5638	9	0.000106488	0.298021
	YWHAH	33.521	9	0.00010834	0.314288
	CTBP1	33.4562	9	0.000111201	0.281212
	IDI1	33.2752	9	0.00011959	0.2536
	PYCARD	33.0244	9	0.000132255	0.352766
	FGR	32.8371	9	0.00014256	0.315831
	GK5	31.8718	9	0.00020955	0.46083
	CISH	30.6253	9	0.00034318	0.481518
	RCBTB2	30.4789	9	0.000363533	0.433745
	RAP1GAP2	30.3432	9	0.000383459	0.352139
	ORMDL2	30.2758	9	0.000393741	0.554169
	RIN3	30.1584	9	0.000412303	0.355377
	ISG15	29.2014	9	0.000599236	0.504119
	RPAP2	28.8724	9	0.000680938	0.292133
	TES	28.686	9	0.000731948	0.291832
	GATA3	28.6021	9	0.00075613	0.277458
	PARP15	28.5584	9	0.000769008	0.265498
	CALCOCO1	28.4354	9	0.000806478	0.273226
	LINC02084	28.1095	9	0.000914501	0.307606
	CST3	27.9533	9	0.000971153	0.822394
	LRIF1	27.6303	9	0.00109938	0.366147
	C7orf50	27.5662	9	0.00112671	0.253024
	NBEAL2	27.5634	9	0.00112794	0.348117
	THYN1	27.3667	9	0.00121611	0.259704
	MPC1	26.991	9	0.00140359	0.255357
	ITGAL	26.979	9	0.00141	0.313804
	KIF21A	26.9706	9	0.00141451	0.251605
	PARVG	26.5625	7	0.000399419	0.308399
	EIF2S1	26.3545	9	0.00178713	0.51026
	NPC2	25.9727	7	0.000509361	0.296562
	CMTM6	25.8561	9	0.00215667	0.333495
	EIF3J	24.4264	9	0.00367575	0.318895
	NUDT1	24.3615	9	0.00376499	0.267081
	CDK6	23.9362	9	0.00440337	0.4387
	CIAO1	23.7899	9	0.00464616	0.412789
	PCNX1	23.6121	9	0.00495852	0.263983
	NAA38	23.3394	9	0.00547736	0.348643
	RNPS1	23.3355	9	0.00548521	0.278961
	BNIP3L	23.2358	9	0.00568786	0.324699
	PTPRE	23.0174	9	0.00615741	0.260454
	NAXE	22.904	9	0.0064156	0.40506
	ANXA4	22.8535	9	0.00653393	0.458549
	KPNA3	22.5591	9	0.00726619	0.448843
	IFI27L2	22.44	9	0.00758433	0.292126
	SUMO3	22.4279	9	0.00761734	0.250012
	ZNF276	22.2492	7	0.00230086	0.251568
	SPCS3	22.2235	9	0.00819686	0.26935
	HECA	21.863	7	0.00268225	0.272705
	TMEM134	21.7397	9	0.00974164	0.268721
	PPM1M	21.6344	7	0.00293632	0.407252
	B3GNT2	21.0058	8	0.00713208	0.331899

## Sheet: Table S8 - Conserved Markers
Table S8: Conserved signature between KIR+CD8+ T cells in the blood (PBMC) and tumor (TIL)
	gene	avg_fc	TIL_p_val	TIL_avg_log2FC	TIL_pct.1	TIL_pct.2	TIL_p_val_adj	PBMC_p_val	PBMC_avg_log2FC	PBMC_pct.1	PBMC_pct.2	PBMC_p_val_adj	max_pval	minimump_p_val
	GNLY	1.06174	0	1.03885	0.57	0.234	0	0	1.08462	0.932	0.532	0	0	0
	KLRC2	0.749926	4.56794923921071e-18	-0.165103	0.144	0.212	8.70697e-14	0	1.66495	0.676	0.073	0	4.56795e-18	0
	FGFBP2	0.70375	0	0.90596	0.329	0.022	0	1.27385e-227	0.50154	0.739	0.408	2.42809e-223	1.27385e-227	0
	GZMH	0.684143	4.3878563725375e-278	0.709077	0.822	0.541	8.36369e-274	0	0.659209	0.959	0.583	0	4.38786e-278	0
	TYROBP	0.659277	1.78615461976374e-54	0.182834	0.077	0.025	3.40459e-50	0	1.13572	0.464	0.077	0	1.78615e-54	0
	FCGR3A	0.655461	0	0.46082	0.223	0.033	0	0	0.850101	0.683	0.216	0	0	0
	HOPX	0.632235	6.52444217772868e-208	0.484604	0.432	0.194	1.24362e-203	0	0.779866	0.729	0.311	0	6.52444e-208	0
	EFHD2	0.631317	5.62734977285059e-173	0.548485	0.533	0.32	1.07263e-168	0	0.714149	0.847	0.474	0	5.62735e-173	0
	NKG7	0.582886	1.26146122905279e-150	0.396245	0.994	0.904	2.40447e-146	0	0.769528	1	0.798	0	1.26146e-150	0
	KLRD1	0.545181	2.67773590654159e-105	0.397156	0.599	0.409	5.10403e-101	0	0.693207	0.798	0.399	0	2.67774e-105	0
	PRF1	0.522716	9.01910321644808e-22	0.218486	0.705	0.634	1.71913e-17	0	0.826947	0.913	0.538	0	9.0191e-22	0
	KLF2	0.497328	0	0.744774	0.624	0.297	0	3.49553e-75	0.249882	0.938	0.859	6.66283e-71	3.49553e-75	0
	TXNIP	0.469863	7.38189876713209e-249	0.905929	0.758	0.532	1.40706e-244	1.34363e-06	0.0337972	0.966	0.948	0.0256109	1.34363e-06	1.47638e-248
	TGFB1	0.452389	1.38335152172424e-121	0.466077	0.608	0.44	2.63681e-117	1.85965e-183	0.438702	0.815	0.607	3.54468e-179	1.38335e-121	3.7193e-183
	IFITM2	0.438259	6.42844723346325e-31	0.219222	0.829	0.789	1.22533e-26	0	0.657296	0.918	0.75	0	6.42845e-31	0
	CMC1	0.435314	1.35644057738522e-48	0.327941	0.434	0.318	2.58551e-44	7.72091e-277	0.542688	0.74	0.408	1.47168e-272	1.35644e-48	1.54418e-276
	KLRG1	0.433096	1.78278924723827e-169	0.430172	0.439	0.222	3.39817e-165	2.01152e-199	0.43602	0.68	0.416	3.83415e-195	1.78279e-169	4.02303e-199
	GZMB	0.429199	4.28101073900995e-56	0.0100733	0.705	0.509	8.16003e-52	0	0.848324	0.857	0.42	0	4.28101e-56	0
	KLRF1	0.428539	0	0.228524	0.119	0.009	0	0	0.628555	0.498	0.12	0	0	0
	ABHD17A	0.424408	1.65706011273005e-41	0.261529	0.528	0.432	3.15852e-37	0	0.587287	0.778	0.48	0	1.65706e-41	0
	ARL4C	0.42283	1.70737711679407e-125	0.452704	0.708	0.542	3.25443e-121	3.23325e-161	0.392957	0.853	0.651	6.1629e-157	1.70738e-125	6.4665e-161
	CST7	0.409803	7.41668919602425e-23	0.118905	0.971	0.887	1.4137e-18	0	0.7007	0.995	0.77	0	7.41669e-23	0
	PLEK	0.409701	1.49822350126033e-176	0.402278	0.38	0.175	2.85576e-172	3.45339e-200	0.417123	0.696	0.419	6.58251e-196	1.49822e-176	6.90678e-200
	CYBA	0.406686	6.24413760205048e-60	0.252854	0.969	0.942	1.1902e-55	0	0.560519	0.991	0.915	0	6.24414e-60	0
	CX3CR1	0.373635	0	0.291581	0.145	0.007	0	2.30108e-267	0.45569	0.501	0.221	4.3861e-263	2.30108e-267	0
	ITGB2	0.363121	6.2314635952698e-17	0.179207	0.722	0.686	1.18778e-12	2.47532e-297	0.547036	0.94	0.759	4.71822e-293	6.23146e-17	4.95065e-297
	CCL4	0.350857	2.84279752207162e-102	0.471147	0.84	0.686	5.41866e-98	3.56096e-79	0.230567	0.598	0.399	6.78755e-75	3.56096e-79	5.6856e-102
	GZMA	0.345167	1.96659664963591e-45	0.207156	0.934	0.817	3.74853e-41	1.53344e-218	0.483179	0.971	0.72	2.9229e-214	1.9666e-45	3.06689e-218
	S1PR5	0.345032	0	0.24931	0.159	0.015	0	1.33994e-301	0.440755	0.483	0.2	2.55405e-297	1.33994e-301	0
	PLAC8	0.341322	3.83019415278679e-117	0.22061	0.158	0.052	7.30073e-113	1.35785e-213	0.462034	0.534	0.29	2.5882e-209	3.83019e-117	2.7157e-213
	EMP3	0.335806	1.11387285153846e-152	0.46668	0.763	0.574	2.12315e-148	1.83601e-57	0.204931	0.914	0.821	3.49963e-53	1.83601e-57	2.22775e-152
	SPON2	0.32602	4.56574938645864e-215	0.3917	0.249	0.077	8.70277e-211	6.20175e-74	0.26034	0.421	0.265	1.18211e-69	6.20175e-74	9.1315e-215
	AOAH	0.324141	1.76115864563891e-94	0.271667	0.36	0.201	3.35694e-90	2.02767e-207	0.376616	0.487	0.24	3.86494e-203	1.76116e-94	4.05534e-207
	FCRL6	0.320389	1.50443053535654e-159	0.261931	0.217	0.072	2.8676e-155	1.00607e-210	0.378846	0.532	0.27	1.91768e-206	1.50443e-159	2.01215e-210
	KLRB1	0.32003	9.68195211837607e-68	0.314473	0.188	0.09	1.84548e-63	9.8973e-48	0.325587	0.349	0.234	1.88653e-43	9.8973e-48	1.93639e-67
	MATK	0.319987	9.3912934850961e-118	0.267051	0.315	0.152	1.79007e-113	1.11468e-175	0.372924	0.599	0.355	2.12469e-171	9.39129e-118	2.22936e-175
	GZMM	0.319729	2.00865544249638e-113	0.375289	0.621	0.433	3.8287e-109	5.81198e-87	0.264169	0.846	0.71	1.10782e-82	5.81198e-87	4.01731e-113
	ZEB2	0.317356	7.98065243625331e-44	0.206474	0.347	0.238	1.52119e-39	4.89282e-223	0.428238	0.574	0.298	9.3262e-219	7.98065e-44	9.78563e-223
	FLNA	0.317245	6.62476884799246e-82	0.357596	0.509	0.36	1.26275e-77	6.59285e-78	0.276894	0.724	0.566	1.25666e-73	6.59285e-78	1.32495e-81
	CALM1	0.317072	6.02919075026369e-118	0.376035	0.957	0.926	1.14922e-113	5.81117e-100	0.258109	0.99	0.966	1.10767e-95	5.81117e-100	1.20584e-117
	TBX21	0.313655	4.49437229514564e-67	0.208446	0.263	0.146	8.56672e-63	2.64401e-243	0.418863	0.524	0.252	5.03975e-239	4.49437e-67	5.28802e-243
	AHNAK	0.310629	1.10769919172146e-83	0.39264	0.547	0.391	2.11139e-79	5.09239e-58	0.228617	0.738	0.588	9.70661e-54	5.09239e-58	2.2154e-83
	S100A4	0.305616	5.26753810077553e-93	0.432796	0.935	0.884	1.00405e-88	5.62567e-52	0.178436	0.991	0.909	1.07231e-47	5.62567e-52	1.05351e-92
	PTGDR	0.301262	2.91511518354224e-113	0.194324	0.178	0.064	5.5565e-109	2.09683e-251	0.4082	0.46	0.203	3.99677e-247	2.91512e-113	4.19366e-251
	KIR2DL3	0.297832	7.8954792433183e-55	0.0755364	0.046	0.01	1.50496e-50	0	0.520128	0.319	0.021	0	7.89548e-55	0
	MBP	0.292038	2.92897957842792e-49	0.213608	0.425	0.303	5.58293e-45	2.42819e-152	0.370468	0.68	0.465	4.62837e-148	2.92898e-49	4.85638e-152
	ANXA1	0.287719	7.2268241624892e-174	0.505424	0.69	0.453	1.3775e-169	1.15728e-13	0.070013	0.785	0.691	2.20588e-09	1.15728e-13	1.44536e-173
	S100A10	0.287494	1.82067184570629e-186	0.512172	0.741	0.523	3.47038e-182	3.78202e-12	0.0628154	0.882	0.824	7.20891e-08	3.78202e-12	3.64134e-186
	IFITM3	0.286833	4.16617530086065e-26	0.284704	0.362	0.29	7.94115e-22	8.60671e-89	0.288961	0.461	0.291	1.64053e-84	4.16618e-26	1.72134e-88
	IER2	0.283764	1.94607085642484e-97	0.501855	0.741	0.624	3.70941e-93	4.08025e-21	0.065673	0.735	0.624	7.77737e-17	4.08025e-21	3.89214e-97
	MYL12A	0.279717	1.32832077577141e-121	0.367193	0.974	0.937	2.53191e-117	2.3791e-61	0.192242	0.992	0.974	4.5348e-57	2.3791e-61	2.65664e-121
	BIN2	0.276807	2.96858470617251e-78	0.276279	0.425	0.276	5.65842e-74	7.48556e-84	0.277336	0.728	0.58	1.42682e-79	2.96858e-78	1.49711e-83
	FGR	0.27212	9.11942327242832e-266	0.192865	0.133	0.018	1.73825e-261	9.03888e-233	0.351376	0.409	0.171	1.7229e-228	9.03888e-233	1.82388e-265
	SLC9A3R1	0.268522	4.66010066994562e-15	0.13691	0.546	0.488	8.88262e-11	3.80426e-174	0.400135	0.793	0.567	7.2513e-170	4.6601e-15	7.60852e-174
	LITAF	0.263632	4.48252370517875e-21	0.164429	0.594	0.524	8.54414e-17	7.06558e-146	0.362835	0.864	0.699	1.34677e-141	4.48252e-21	1.41312e-145
	CD300A	0.261452	3.64368527105319e-105	0.167543	0.141	0.046	6.94523e-101	8.72933e-267	0.355362	0.352	0.125	1.6639e-262	3.64369e-105	1.74587e-266
	TGFBR3	0.260973	3.08436406231239e-209	0.278507	0.194	0.05	5.87911e-205	1.5622e-92	0.24344	0.411	0.243	2.97772e-88	1.5622e-92	6.16873e-209
	TTC38	0.26035	6.90020228562276e-43	0.13283	0.145	0.074	1.31525e-38	1.20111e-298	0.38787	0.407	0.149	2.28943e-294	6.9002e-43	2.40221e-298
	PTP4A2	0.259246	4.71149154498819e-54	0.278931	0.617	0.509	8.98057e-50	1.64419e-74	0.239561	0.784	0.631	3.13399e-70	4.71149e-54	3.28838e-74
	TPST2	0.257276	1.66238448945157e-35	0.194818	0.346	0.253	3.16867e-31	1.75391e-123	0.319733	0.564	0.364	3.34313e-119	1.66238e-35	3.50782e-123
	CD99	0.249609	6.41968578485685e-33	0.186552	0.885	0.843	1.22366e-28	6.4539e-129	0.312665	0.954	0.829	1.23018e-124	6.41969e-33	1.29078e-128
	APMAP	0.248375	4.94342979999237e-10	0.0980959	0.384	0.335	9.42267e-06	9.30053e-197	0.398653	0.647	0.389	1.77277e-192	4.94343e-10	1.86011e-196
	PTPRC	0.245854	2.38399012894815e-37	0.207782	0.956	0.949	4.54412e-33	2.9987e-122	0.283926	0.988	0.945	5.71582e-118	2.38399e-37	5.9974e-122
	CTSC	0.244887	4.90717774561529e-16	0.140139	0.6	0.537	9.35357e-12	1.85484e-151	0.349636	0.705	0.465	3.53551e-147	4.90718e-16	3.70968e-151
	C1orf21	0.242476	1.85233635373129e-177	0.217084	0.173	0.045	3.53074e-173	1.08832e-134	0.267869	0.395	0.203	2.07445e-130	1.08832e-134	3.70467e-177
	LCP1	0.24208	5.50442761551512e-38	0.225096	0.777	0.709	1.0492e-33	4.61803e-75	0.259065	0.824	0.693	8.80243e-71	5.50443e-38	9.23606e-75
	RAP1B	0.239967	5.80937395284336e-44	0.26213	0.562	0.469	1.10732e-39	1.37852e-61	0.217803	0.785	0.66	2.6276e-57	5.80937e-44	2.75704e-61
	HCST	0.239917	6.11160906592326e-45	0.191199	0.961	0.929	1.16493e-40	3.05519e-102	0.288636	0.983	0.94	5.82349e-98	6.11161e-45	6.11037e-102
	PFN1	0.238082	2.92159946939737e-16	0.0968099	0.997	0.996	5.56886e-12	2.14484e-219	0.379353	1	0.994	4.08828e-215	2.9216e-16	4.28968e-219
	C12orf75	0.236994	1.47619492403055e-81	0.28862	0.475	0.314	2.81378e-77	3.68871e-53	0.185367	0.618	0.465	7.03105e-49	3.68871e-53	2.95239e-81
	ADGRG1	0.236146	0.000384247965881325	0.0283647	0.227	0.198	1	2.48621e-288	0.443927	0.561	0.251	4.73897e-284	0.000384248	4.97242e-288
	IGLV2-14	0.234743	4.44847188497938e-50	0.449479	0.072	0.024	8.47923e-46	4.69665e-05	0.0200068	0.144	0.118	0.895228	4.69665e-05	8.89694e-50
	SYNE1	0.23247	3.6356664885148e-56	0.248661	0.337	0.221	6.92994e-52	6.43971e-60	0.216278	0.518	0.373	1.22747e-55	3.63567e-56	1.28794e-59
	XBP1	0.229938	5.60632531072139e-58	0.287852	0.367	0.247	1.06862e-53	7.89862e-29	0.172025	0.478	0.388	1.50556e-24	7.89862e-29	1.12127e-57
	ANXA2	0.226879	8.39823009881716e-39	0.198632	0.477	0.365	1.60079e-34	8.58755e-85	0.255125	0.578	0.402	1.63687e-80	8.39823e-39	1.71751e-84
	SSBP4	0.223456	1.32434466458949e-26	0.160921	0.364	0.281	2.52433e-22	1.31231e-106	0.28599	0.587	0.392	2.5014e-102	1.32434e-26	2.62462e-106
	CEP78	0.220832	2.73063387623517e-18	0.0838915	0.107	0.065	5.20486e-14	1.37405e-230	0.357773	0.386	0.158	2.61908e-226	2.73063e-18	2.7481e-230
	GNG2	0.220406	7.44627464784182e-34	0.201441	0.522	0.428	1.41933e-29	1.80625e-75	0.239371	0.557	0.389	3.44289e-71	7.44627e-34	3.6125e-75
	GADD45B	0.218774	6.57958111347121e-57	0.387392	0.558	0.439	1.25413e-52	1.99261e-15	0.0501562	0.538	0.445	3.79812e-11	1.99261e-15	1.31592e-56
	SAMD3	0.217845	1.25609600070151e-46	0.21117	0.38	0.265	2.39424e-42	1.37798e-72	0.224519	0.518	0.356	2.62657e-68	1.2561e-46	2.75596e-72
	IFITM1	0.216796	7.29717697303546e-29	0.170451	0.963	0.935	1.39091e-24	5.16113e-93	0.263141	0.988	0.976	9.83762e-89	7.29718e-29	1.03223e-92
	ZFP36	0.216459	4.26363890116311e-42	0.364122	0.856	0.796	8.12692e-38	6.00564e-10	0.0687949	0.77	0.713	1.14473e-05	6.00564e-10	8.52728e-42
	MYL12B	0.213304	6.12982112133298e-49	0.214236	0.884	0.841	1.16841e-44	2.97564e-71	0.212372	0.917	0.849	5.67187e-67	6.12982e-49	5.95128e-71
	RHOC	0.212801	0.00101695862052739	-0.0415572	0.293	0.322	1	7.0789e-292	0.467159	0.528	0.239	1.34931e-287	0.00101696	1.41578e-291
	TLE5	0.208976	6.19986039763011e-28	0.236735	0.666	0.614	1.18176e-23	9.40284e-42	0.181217	0.881	0.784	1.79228e-37	6.19986e-28	1.88057e-41
	CD81	0.207324	6.24321339608334e-05	0.0317289	0.644	0.598	1	3.33347e-163	0.382919	0.761	0.512	6.35393e-159	6.24321e-05	6.66694e-163
	GNAI2	0.206655	0.000520982983968011	0.0608479	0.614	0.594	1	2.08345e-139	0.352462	0.764	0.556	3.97126e-135	0.000520983	4.1669e-139
	CAST	0.206235	3.98991438599647e-16	0.119769	0.39	0.324	7.60518e-12	1.07904e-92	0.2927	0.613	0.443	2.05675e-88	3.98991e-16	2.15808e-92
	CD63	0.202216	3.26248417209118e-08	-0.106052	0.483	0.527	0.000621862	1.33095e-273	0.510484	0.651	0.365	2.53692e-269	3.26248e-08	2.6619e-273
	ADRB2	0.202013	9.91538062326011e-173	0.225908	0.19	0.055	1.88997e-168	3.93493e-75	0.178119	0.274	0.148	7.50038e-71	3.93493e-75	1.98308e-172
	PPP2R5C	0.200662	3.9101228830233e-31	0.186846	0.53	0.434	7.45309e-27	8.45571e-58	0.214478	0.625	0.483	1.61174e-53	3.91012e-31	1.69114e-57
	PIP4K2A	0.197281	1.39073072779174e-28	0.157182	0.351	0.263	2.65087e-24	4.65205e-76	0.237379	0.48	0.324	8.86728e-72	1.39073e-28	9.3041e-76
	MAPK1	0.195906	1.49067079838919e-44	0.166608	0.274	0.174	2.84137e-40	9.71892e-88	0.225205	0.364	0.211	1.85252e-83	1.49067e-44	1.94378e-87
	MYBL1	0.193547	3.54327217622111e-222	0.280485	0.203	0.051	6.75383e-218	1.17338e-27	0.106609	0.334	0.24	2.23658e-23	1.17338e-27	7.08654e-222
	CD53	0.192957	3.80564477155335e-12	0.121454	0.645	0.61	7.25394e-08	2.56527e-79	0.26446	0.677	0.528	4.88966e-75	3.80564e-12	5.13054e-79
	RASSF1	0.191857	0.000240132434178402	0.0544819	0.277	0.249	1	3.99611e-142	0.329232	0.545	0.33	7.61699e-138	0.000240132	7.99222e-142
	HIST1H1E	0.191207	2.00134620487297e-27	0.172352	0.505	0.416	3.81477e-23	6.294e-35	0.210062	0.684	0.563	1.1997e-30	2.00135e-27	1.2588e-34
	MYO1F	0.190514	3.37343716089885e-17	0.114664	0.258	0.197	6.43011e-13	4.9544e-107	0.266364	0.474	0.289	9.44358e-103	3.37344e-17	9.9088e-107
	CD160	0.188842	2.28430504348779e-95	0.102096	0.077	0.017	4.35411e-91	3.01749e-227	0.275589	0.238	0.071	5.75164e-223	2.28431e-95	6.03499e-227
	NCR3	0.188823	2.21170017313487e-27	0.104101	0.118	0.065	4.21572e-23	6.27877e-152	0.273546	0.288	0.121	1.1968e-147	2.2117e-27	1.25575e-151
	SYNE2	0.187059	2.06124185236407e-13	0.142473	0.488	0.433	3.92893e-09	1.38587e-64	0.231645	0.682	0.524	2.64161e-60	2.06124e-13	2.77174e-64
	DHRS7	0.186752	9.18745925541917e-12	0.120629	0.458	0.406	1.75122e-07	3.11174e-85	0.252875	0.621	0.451	5.93129e-81	9.18746e-12	6.22348e-85
	SPN	0.185792	6.2268739644365e-06	0.0825507	0.337	0.303	0.11869	9.75808e-105	0.289033	0.517	0.331	1.85999e-100	6.22687e-06	1.95162e-104
	TLN1	0.182006	0.00582048210772481	0.060007	0.451	0.434	1	5.38941e-103	0.304005	0.589	0.408	1.02728e-98	0.00582048	1.07788e-102
	S100A6	0.181552	9.65711115743063e-82	0.314332	0.922	0.867	1.84074e-77	9.56348e-09	0.0487715	0.963	0.942	0.00018229	9.56348e-09	1.93142e-81
	PRSS23	0.181468	3.33651602134047e-166	0.192218	0.134	0.03	6.35973e-162	4.47295e-77	0.170717	0.358	0.204	8.52588e-73	4.47295e-77	6.67303e-166
	DOK2	0.180454	0.000309581929484449	0.0667447	0.324	0.299	1	3.28199e-116	0.294163	0.516	0.319	6.25581e-112	0.000309582	6.56399e-116
	MXRA7	0.176357	4.81309239736536e-40	0.152516	0.212	0.127	9.17424e-36	6.70421e-89	0.200197	0.275	0.141	1.27789e-84	4.81309e-40	1.34084e-88
	CCND3	0.1721	7.86500585803129e-30	0.227288	0.557	0.482	1.49915e-25	5.49154e-15	0.116912	0.713	0.651	1.04674e-10	5.49154e-15	1.573e-29
	YPEL3	0.170663	0.00117515920823939	0.0543842	0.446	0.42	1	6.14042e-89	0.286942	0.641	0.472	1.17043e-84	0.00117516	1.22808e-88
	CFL1	0.170544	0.00144041605389881	0.0329312	0.99	0.989	1	2.10226e-149	0.308156	0.997	0.979	4.00712e-145	0.00144042	4.20452e-149
	HLA-B	0.168484	0.00130453045898809	0.0492818	0.999	1	1	8.77345e-190	0.287687	1	1	1.67231e-185	0.00130453	1.75469e-189
	SELPLG	0.166956	3.27883541330083e-26	0.18023	0.516	0.429	6.24979e-22	7.9243e-28	0.153683	0.543	0.452	1.51045e-23	3.27884e-26	1.58486e-27
	KLRC3	0.166876	4.59895799991963e-16	-0.079316	0.042	0.084	8.76607e-12	0	0.413068	0.295	0.031	0	4.59896e-16	0
	DSTN	0.165152	1.39383752409693e-69	0.246826	0.271	0.153	2.65679e-65	1.11445e-11	0.0834782	0.419	0.356	2.12425e-07	1.11445e-11	2.78768e-69
	IQGAP2	0.165004	1.01273082288204e-21	0.127285	0.309	0.234	1.93037e-17	1.43469e-62	0.202724	0.42	0.28	2.73466e-58	1.01273e-21	2.86938e-62
	ZBTB7A	0.162597	1.18989112400641e-06	0.0630545	0.252	0.215	0.0226805	3.67183e-97	0.262139	0.422	0.255	6.99888e-93	1.18989e-06	7.34366e-97
	CDC42	0.162413	6.08923199190658e-08	0.106507	0.589	0.561	0.00116067	8.53254e-54	0.218319	0.746	0.64	1.62639e-49	6.08923e-08	1.70651e-53
	AGTRAP	0.161757	4.21013445089376e-27	0.127462	0.233	0.158	8.02494e-23	2.86478e-72	0.196052	0.336	0.199	5.46057e-68	4.21013e-27	5.72957e-72
	CDKN2D	0.161297	1.52067978545082e-44	0.141928	0.206	0.117	2.89857e-40	2.92834e-50	0.180666	0.448	0.319	5.5817e-46	1.52068e-44	5.85667e-50
	IKZF2	0.159234	9.9458777163413e-06	-0.0320919	0.038	0.057	0.189578	0	0.350559	0.262	0.034	0	9.94588e-06	0
	MYO1G	0.158509	5.4621809040845e-09	0.0936463	0.291	0.248	0.000104115	3.02967e-66	0.223372	0.523	0.37	5.77485e-62	5.46218e-09	6.05933e-66
	OSTF1	0.158334	5.73995960981609e-09	0.104815	0.381	0.339	0.000109409	4.76248e-62	0.211854	0.501	0.358	9.07776e-58	5.73996e-09	9.52496e-62
	YWHAZ	0.15779	3.08162510472081e-06	0.0801643	0.843	0.827	0.0587389	8.54496e-75	0.235416	0.906	0.827	1.62876e-70	3.08163e-06	1.70899e-74
	KLF13	0.157677	8.45500143528399e-36	0.174114	0.345	0.247	1.61161e-31	5.26078e-30	0.14124	0.452	0.351	1.00276e-25	5.26078e-30	1.691e-35
	SYTL1	0.156153	1.80998687946977e-21	0.121758	0.264	0.194	3.45002e-17	6.63564e-48	0.190547	0.49	0.366	1.26482e-43	1.80999e-21	1.32713e-47
	ABI3	0.155904	1.70546814769471e-05	0.0656691	0.348	0.313	0.325079	1.19314e-102	0.246139	0.368	0.204	2.27424e-98	1.70547e-05	2.38627e-102
	CD320	0.154678	2.31854816198534e-17	0.132949	0.177	0.127	4.41938e-13	1.69381e-60	0.176407	0.322	0.197	3.22857e-56	2.31855e-17	3.38762e-60
	PXN	0.153233	7.80382795024649e-80	0.150298	0.141	0.054	1.48749e-75	7.4492e-42	0.156169	0.34	0.232	1.41989e-37	7.4492e-42	1.56077e-79
	GLUL	0.152701	8.97614127360313e-119	0.202095	0.174	0.06	1.71094e-114	7.9266e-28	0.103306	0.186	0.119	1.51089e-23	7.9266e-28	1.79523e-118
	NFKBIA	0.152419	2.40219136952231e-65	0.549676	0.669	0.568	4.57882e-61	8.85794e-24	-0.244837	0.51	0.58	1.68841e-19	8.85794e-24	4.80438e-65
	PTGER2	0.150893	2.41576537870008e-101	0.214309	0.194	0.078	4.60469e-97	1.58254e-17	0.0874764	0.345	0.269	3.01647e-13	1.58254e-17	4.83153e-101

## Sheet: Table S9 - RNA-ADT correlation
Table S9: Spearman correlation coefficient between RNA and CITEseq expression
	gene	rho	p-value
	CD8A	0.428193	0
	KLRK1	0.414901	0
	ADGRG1	0.305657	0
	SELL	0.301574	0
	KLRB1	0.279995	0
	KLRG1	0.271156	0
	CD27	0.248352	0
	ICOS	0.24373	0
	KLRD1	0.240927	0
	HLA-A	0.236287	0
	CD69	0.235088	0
	ITGA4	0.234988	0
	CD81	0.225955	0
	IL7R	0.221562	0
	CD4	0.200195	0
	CD5	0.199583	0
	ITGB1	0.197677	0
	CD2	0.19309	0
	CD7	0.186882	0
	CD82	0.184704	0
	CCR6	0.179455	0
	CD28	0.176692	0
	TIGIT	0.175136	0
	NT5E	0.166319	0
	CD48	0.166265	0
	DPP4	0.163528	0
	CD226	0.158703	0
	CD44	0.15441	0
	CXCR3	0.152854	0
	CCR4	0.148221	0
	ITGAL	0.145449	0
	PECAM1	0.14458	0
	CD52	0.138025	0
	KIR2DL3	0.137946	0
	IL2RA	0.136295	0
	CD99	0.13296	0
	TNFRSF4	0.131319	0
	CX3CR1	0.12537	1.97626258336499e-323
	FAS	0.121918	8.08079e-306
	SLAMF7	0.104452	1.34522e-224
	LAG3	0.0986563	1.7833e-200
	ITGAM	0.0958962	1.76807e-189
	SLAMF6	0.094038	2.96422e-182
	CD3D	0.092969	3.65859e-178
	CD83	0.0795872	5.88103e-131
	TNFRSF14	0.077636	1.08224e-124
	CD58	0.0757416	9.26707e-119
	CD244	0.0706532	1.48404e-103
	KIR3DL1	0.0684103	3.43451e-97
	ITGA6	0.067987	5.17228e-96
	ITGB2	0.0665741	3.91258e-92
	TFRC	0.0663843	1.28048e-91
	B3GAT1	0.0662487	2.98039e-91
	CD101	0.0660223	1.21629e-90
	CTLA4	0.065348	7.79841e-89
	CXCR5	0.0633845	1.11672e-83
	MS4A1	0.0583929	2.78872e-71
	CD40LG	0.0574621	4.41206e-69
	ENTPD1	0.0529047	7.99144e-59
	ITGA1	0.0520489	5.42824e-57
	NCAM1	0.0518219	1.64208e-56
	FCGR3A	0.0508789	1.55164e-54
	IL4R	0.0455959	3.88152e-44
	IL2RB	0.0453107	1.312e-43
	KIR2DL1	0.0437069	1.07627e-40
	CR1	0.0413325	1.42716e-36
	BTLA	0.0395511	1.25162e-33
	CCR5	0.0390694	7.43315e-33
	CD274	0.0367599	2.82314e-29
	CR2	0.0366668	3.8946e-29
	ITGB7	0.0361555	2.2485e-28
	ENG	0.0309191	3.49209e-21
	PDCD1	0.0305955	8.93932e-21
	ITGAE	0.0258842	2.6169e-15
	TNFRSF13C	0.0248199	3.3846e-14
	MCAM	0.0235173	6.73935e-13
	TNFRSF9	0.0233269	1.02995e-12
	CD47	0.0214557	5.57781e-11
	CD79B	0.0173297	1.19703e-07
	ICAM1	0.0164425	5.09032e-07
	IL3RA	0.0162085	7.36817e-07
	CD38	0.015444	2.38388e-06
	LAMP1	0.013379	4.37095e-05
	ITGA2	0.00831359	0.0111004
	IFNGR1	0.00673566	0.0396377
	LILRB1	0.00468116	0.15274
	SELP	0.00304852	0.351747
	C5AR1	-0.14579	0
	CD14	-0.121894	1.05782e-305
	CLEC12A	-0.116108	2.23225e-277
	FCGR2A	-0.101767	3.01479e-213
	CD163	-0.0861505	3.48682e-153
	ANPEP	-0.085508	6.26186e-151
	CD1D	-0.0751705	5.32592e-117
	CD36	-0.0751096	8.18947e-117
	HLA-DRA	-0.0639599	3.57641e-85
	PTPRC	-0.0562695	2.57564e-66
	CD86	-0.0526293	3.13005e-58
	NECTIN2	-0.0510578	6.5913e-55
	FCER2	-0.0474279	1.29291e-47
	IGKC	-0.0468614	1.5903e-46
	FCGR1A	-0.0425671	1.09487e-38
	PTPRC	-0.0420845	7.47379e-38
	CD33	-0.0415627	5.81802e-37
	GGT1	-0.0401947	1.11954e-34
	GP1BB	-0.0383648	9.68424e-32
	CD24	-0.0366916	3.57542e-29
	THBD	-0.0359567	4.41639e-28
	FCER1A	-0.0345958	4.06804e-26
	CD19	-0.0325976	2.28214e-23
	CD1C	-0.0315726	5.0814e-22
	IGHM	-0.0299156	6.23902e-20
	SIGLEC1	-0.0298049	8.52741e-20
	ITGAX	-0.028741	1.61909e-18
	TNFRSF13B	-0.0259919	2.00797e-15
	PVR	-0.0243143	1.10097e-13
	NCR1	-0.0199156	1.1718e-09
	PTPRC	-0.0199135	1.17653e-09
	ITGA2B	-0.0190877	5.50691e-09
	CD22	-0.0150788	4.09975e-06
	IGHD	-0.0148665	5.58871e-06
	HLA-E	-0.0132788	4.9851e-05
	CLEC4C	-0.011145	0.000662945
	HAVCR2	-0.00981807	0.00270768
	CD40	-0.00732097	0.025332
	SIGLEC7	-0.00336186	0.304458

[truncated: 2 more sheets: Table S10 - Flow cytometry, Table S11 - scRNAseq outcomes]
